# Supplementary material for: Outdoor green space exposure and brain health measures related to Alzheimer’s disease: a rapid review
Source: PubMed Central journal article supplement — BMJ Open. 2021 May 3;11(5):e043456. doi: 10.1136/bmjopen-2020-043456 (PMC8098949; doi:10.1136/bmjopen-2020-043456), 2021-05-03
Supplement: bmjopen-2020-043456.draft_revisions.pdf [file bmjopen-2020-043456.draft_revisions.pdf]

# BMJ Open

BMJ Open is committed to open peer review. As part of this commitment we make the peer review history of every article we publish publicly available.

When an article is published we post the peer reviewers' comments and the authors' responses online. We also post the versions of the paper that were used during peer review. These are the versions that the peer review comments apply to.

The versions of the paper that follow are the versions that were submitted during the peer review process. They are not the versions of record or the final published versions. They should not be cited or distributed as the published version of this manuscript.

BMJ Open is an open access journal and the full, final, typeset and author-corrected version of record of the manuscript is available on our site with no access controls, subscription charges or pay-per-view fees (<http://bmjopen.bmj.com>).

If you have any questions on BMJ Open's open peer review process please email [info.bmjopen@bmj.com](mailto:info.bmjopen@bmj.com)

# BMJ Open

## Outdoor green space exposure and brain health measures related to Alzheimer's disease: A rapid scoping review

|                               |                                                                                                                                        |
|-------------------------------|----------------------------------------------------------------------------------------------------------------------------------------|
| Journal:                      | <i>BMJ Open</i>                                                                                                                        |
| Manuscript ID                 | bmjopen-2020-043456                                                                                                                    |
| Article Type:                 | Original research                                                                                                                      |
| Date Submitted by the Author: | 04-Aug-2020                                                                                                                            |
| Complete List of Authors:     | Besser, Lilah ; Florida Atlantic University, Institute for Human Health and Disease Intervention                                       |
| Keywords:                     | Dementia < NEUROLOGY, Delirium & cognitive disorders < PSYCHIATRY, Old age psychiatry < PSYCHIATRY, PUBLIC HEALTH, PREVENTIVE MEDICINE |
|                               |                                                                                                                                        |

SCHOLARONE™  
Manuscripts

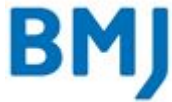

I, the Submitting Author has the right to grant and does grant on behalf of all authors of the Work (as defined in the below author licence), an exclusive licence and/or a non-exclusive licence for contributions from authors who are: i) UK Crown employees; ii) where BMJ has agreed a CC-BY licence shall apply, and/or iii) in accordance with the terms applicable for US Federal Government officers or employees acting as part of their official duties; on a worldwide, perpetual, irrevocable, royalty-free basis to BMJ Publishing Group Ltd ("BMJ") its licensees and where the relevant Journal is co-owned by BMJ to the co-owners of the Journal, to publish the Work in this journal and any other BMJ products and to exploit all rights, as set out in our [licence](#).

The Submitting Author accepts and understands that any supply made under these terms is made by BMJ to the Submitting Author unless you are acting as an employee on behalf of your employer or a postgraduate student of an affiliated institution which is paying any applicable article publishing charge ("APC") for Open Access articles. Where the Submitting Author wishes to make the Work available on an Open Access basis (and intends to pay the relevant APC), the terms of reuse of such Open Access shall be governed by a Creative Commons licence – details of these licences and which [Creative Commons](#) licence will apply to this Work are set out in our licence referred to above.

Other than as permitted in any relevant BMJ Author's Self Archiving Policies, I confirm this Work has not been accepted for publication elsewhere, is not being considered for publication elsewhere and does not duplicate material already published. I confirm all authors consent to publication of this Work and authorise the granting of this licence.

1  
2  
3 **Outdoor green space exposure and brain health measures related to Alzheimer's**  
4 **disease: A rapid scoping review**  
5

6 Lilah M. Besser, PhD MSPH<sup>a</sup>  
7

8 <sup>a</sup> Institute for Human Health and Disease Intervention (I-HEALTH), Department of Urban and  
9 Regional Planning, Florida Atlantic University, Boca Raton, Florida, US, [lbesser@fau.edu](mailto:lbesser@fau.edu)  
10

11 **Corresponding author:**

12 Lilah Besser  
13 777 Glades Road, SO-284H  
14 Institute for Human Health and Disease Intervention  
15 Department of Urban and Regional Planning  
16 Florida Atlantic University  
17 Boca Raton, FL 33431  
18 1-561-297-0614  
19 [lbesser@fau.edu](mailto:lbesser@fau.edu)  
20  
21  
22

23 Abstract: 300

24 Text: 4540

25 References: 66

26 Tables: 3

27 Figures: 1

28 Supplemental data: 1 figure, 1 text, 4 tables  
29  
30  
31  
32  
33  
34  
35  
36  
37  
38  
39  
40  
41  
42  
43  
44  
45  
46  
47  
48  
49  
50  
51  
52  
53  
54  
55  
56  
57  
58  
59  
60

## Abstract

**Objectives:** Summarize studies of outdoor green space exposure and brain health measures related to Alzheimer's disease and associated disorders (ADAD), and determine scientific gaps for future research.

**Design:** Rapid scoping review of primary research studies.

**Methods and outcomes:** PubMed, Embase, and Web of Science Core Collection were systematically searched for articles meeting the criteria published on/before February 13, 2020. The review excluded papers not in English, focused on transient states (e.g., mental fatigue), or not using individual-level measures of brain health (e.g., average school test scores). Brain health measures of interest included cognitive function, clinical diagnosis of cognitive impairment/dementia/ADAD, and brain biomarkers such as those from magnetic resonance imaging (MRI), measures typically associated with ADAD risk and disease progression.

**Results:** Twenty-two papers were published from 2012-2020, eight on <18 year-olds, seven on 18-64 year-olds, and thirteen on ≥65 year-olds. Sixty-four percent defined green space based on the normalized difference vegetation index ("greenness"/healthy vegetation) and 68% focused on cognitive measures of brain health (e.g., memory). Seventeen studies found green space-brain health associations (14 positive, four inverse). Greater green space/greenness was positively associated multiple cognitive domains in 10 studies and with MRI outcomes (regional brain volumes, cortical thickness, integrity) in three studies. Greater neighborhood greenness was associated with lower risk of cognitive impairment/ADAD diagnosis in some studies but increased risk in others (n=4 studies). Physical activity and air pollution exposure (elemental carbon) mediated green space-brain health associations in two studies.

**Conclusions:** Published studies suggest positive green space-brain health associations across the life course, but the methods and cohorts were limited and heterogeneous. Future research using racially/ethnically and geographically diverse cohorts, life course methods, and new green space and brain health measures (e.g., time spent in green spaces, brain biomarkers) will strengthen evidence for causal associations between green space and brain health.

**Keywords:** green space, park, greenness, cognition, Alzheimer, dementia, MRI

### Strengths and limitations of this study

- Three major databases covering biomedical, psychological, environmental, and social science topics and a range of keywords were searched to find pertinent studies regarding associations between green space exposure and Alzheimer's disease and related disorders brain health measures.
- A search of additional databases may have resulted in additional papers.
- Published literature reviews on green space and health and reference lists from the final sample of papers were reviewed to help ensure pertinent papers were not excluded.
- This study was limited to a single reviewer and thus, the methods used to search, screen, select, and chart the final sample of papers could not be duplicated/adjudicated by additional reviewers.
- As a scoping review, this study was not aimed at providing a quantitative evaluation of the evidence or risk for bias.

## Introduction

Nature contact involves time spent in green spaces (e.g., gardens, parks, forests) and blue spaces (e.g., lakes, rivers) where people, live, work, and play. Preliminary studies suggest associations between nature contact and health including reductions in depression, anxiety, and cardiovascular risk factors; improved attention and mood, and increased physical activity.<sup>1</sup> Studies also suggest associations with brain health across the life course.<sup>2-8</sup> For instance, greater neighborhood greenness (i.e., healthy vegetation) has been associated with lower odds of Alzheimer's disease (AD) in older adults.<sup>9</sup>

AD and associated disorders (ADAD) affect approximately 50 million people worldwide, and 15% of older adults have mild cognitive impairment, a frequent antecedent to dementia.<sup>10 11</sup> Older age, lower educational attainment, and genetics (e.g., apolipoprotein E  $\epsilon$ 4 allele carriers) are some of the strongest predictors of AD risk and late-life cognitive decline.<sup>12</sup> Clinicians diagnose AD using cognitive assessments and/or cerebrospinal fluid (CSF) or positron emission (PET) scan biomarkers measuring brain amyloid beta and phosphorylated tau (p-tau), the proteins responsible for AD neuropathology (i.e., plaques and tangles).<sup>13 14</sup> In addition, magnetic resonance imaging (MRI) brain biomarkers such as hippocampal atrophy have been used to support AD diagnosis and to predict AD incidence and disease progression.<sup>15</sup>

The psychological and financial burden of ADAD on patients and families is substantial.<sup>16 17</sup> Health care systems are ill prepared to deal with the increase in ADAD prevalence accompanying the rapidly rising population of older adults<sup>18</sup>, and no effective treatments are currently available. Therefore, an accumulating body of research has focused on individual- and community-level interventions that may help prevent or delay ADAD. Neighborhood green space is one such community-level feature that may be promoted to improve lifelong brain

1  
2  
3 health. Healthy brain development during childhood and maintenance of brain health throughout  
4 adulthood, assisted by living near health-enhancing green spaces, may help reduce ADAD risk.  
5  
6  
7

8  
9 Green space exposure may benefit brain health through a number of pathways: 1) improving  
10 psychological states; 2) improving immune function; 3) increasing physical activity levels; 4)  
11 increasing social engagement/cohesion; and 5) improving air quality.<sup>1</sup> Green space exposure  
12 may reduce stress and mental fatigue and improve attention, consistent with the Stress  
13 Recovery Theory and Attention Restoration Theory.<sup>19-21</sup> These psychological benefits over the  
14 long term may additionally benefit mental health (e.g., anxiety, depression), factors associated  
15 with brain health including ADAD risk.<sup>22</sup> Microbial and antigenic exposures from nature  
16 contact<sup>23</sup>, especially during childhood, may affect lifelong immune function and contribute to  
17 healthy microbiomes, which have been associated with AD.<sup>24</sup> Green spaces provide areas for  
18 recreational exercise. Exposure and access to natural places has been associated with greater  
19 physical activity in children through older adults<sup>25 26</sup>, and obtaining greater physical activity has  
20 been associated with reduced brain atrophy, cognitive decline, and ADAD risk.<sup>27 28</sup> Natural  
21 areas provide spaces for social gathering and engagement.<sup>29</sup> Higher levels of social  
22 engagement has been associated with better cognitive function and reduced AD risk.<sup>30 31</sup> Lastly,  
23 natural areas and parks have been associated with lower levels of harmful air pollutants,  
24 including PM<sub>10</sub> and NO<sub>2</sub><sup>32 33</sup>, which have been associated with cognition and ADAD.<sup>34</sup>  
25  
26  
27  
28  
29  
30  
31  
32  
33  
34  
35  
36  
37  
38  
39  
40  
41  
42  
43  
44

45 Based on the nascent state of green space and ADAD-related brain health research and the  
46 lack of published literature reviews focused on the topic, a scoping review was undertaken.  
47 Consistent with the major goals of a scoping review<sup>35</sup>, this study aimed to: 1) summarize the  
48 extant literature on green space-brain health associations across the life course, and 2) identify  
49 knowledge gaps to inform future research. The primary intent was to identify and describe  
50 current evidence for potential brain health benefits to cognition and brain structure/function due  
51  
52  
53  
54  
55  
56  
57  
58  
59  
60



1  
2  
3 to green space exposure, benefits that may develop and persist in early- and mid-life to reduce  
4  
5 ADAD risk in late-life.  
6  
7  
8

## 9 **Methods**

10  
11 On February 13, 2020, Pubmed, Web of Science Core Collection, and Embase were queried for  
12  
13 the following keywords: “greenspace or green space or greenness or parks or park or park  
14  
15 space or parkspace” and “cognition or cognitive or memory or brain aging or Alzheimer or  
16  
17 Alzheimer’s or dementia or cognitive impairment”. To help ensure the February 13 review did  
18  
19 not miss pertinent papers, a second search of the three databases was performed on July 18,  
20  
21 2020, for the following keywords: “neighborhood environment or wilderness or greenery or  
22  
23 natural space or natural environment or public garden or recreational resource or NDVI or  
24  
25 normalized difference vegetation index or built environment or open space or woodland” and  
26  
27 “brain volume or brain atrophy or neurodegenerative disease or Alzheimer biomarker or  
28  
29 cognition or cognitive or memory or brain aging or Alzheimer or Alzheimer’s or dementia or  
30  
31 cognitive impairment”. The keywords searched reflected the brain health measures of interest  
32  
33 that are typically associated with ADAD risk/disease progression, including cognitive function,  
34  
35 clinical diagnosis of cognitive impairment/dementia/ADAD, and biomarkers such as those from  
36  
37 brain imaging (e.g., MRI). Articles published on/before February 13, 2020, were included in this  
38  
39 review. A detailed description of the search strategy is provided in Supplemental Figure 1.  
40  
41  
42  
43  
44

45 A single reviewer was available for this study. Titles were screened for topics definitely or  
46  
47 possibly related to green space and ADAD-related brain health. Titles potentially related were  
48  
49 included in the abstract review (e.g., green space and child development, neighborhood  
50  
51 environment and Alzheimer’s disease, built environments and aging, outdoors and mental  
52  
53 health). After review, abstracts that moved on to full text review had exposures/outcomes  
54  
55 directly pertinent to this study, focused on associations between green space and other  
56  
57  
58  
59  
60

1  
2  
3 measures but mentioned brain health measures as covariates, or seemed possibly relevant by  
4 including closely related exposures or outcomes (e.g., mental health, frailty, built environment,  
5 nature contact). Full texts included in the final sample reported associations between green  
6 space exposure and brain health outcomes in the main text or supplement. Articles were  
7 excluded if they: 1) were not in English; 2) were not primary research studies; 3) were focused  
8 on indoor green space/views; 4) used virtual reality to simulate green spaces; 5) were ecological  
9 studies (e.g., average school test scores); 6) were focused on mental states (e.g., attention  
10 restoration, mental fatigue); or 7) centered on green space activities such as gardening without  
11 an adequate control/comparison group to sufficiently capture green space as the main  
12 exposure. Reference lists from the final sample and published green space-health reviews were  
13 reviewed to identify other studies meeting the eligibility criteria.<sup>1-8</sup>

14  
15  
16  
17  
18  
19  
20  
21  
22  
23  
24  
25  
26  
27  
28 Papers were described by study design, location, study sample ages, green space and brain  
29 health measures and definitions, statistical methods, and main findings (data were charted into  
30 the Supplemental tables). Key elements were tabulated separately for three major age groups:  
31 children (0-17 years), adults (18-64 years), and older adults ( $\geq 65$  years). The findings were  
32 stratified by age because while studies of children focus on the critical period of childhood  
33 development, studies of 18-64 year olds focus on working adults and studies of  $\geq 65$  year olds  
34 focus on retired-age individuals. Green space exposures and brain health can differ  
35 substantially during these life stages. Results (positive, inverse, null associations) were  
36 summarized according to age group, green space measure, and brain health measure, to  
37 provide compact reference on the scope of the evidence to date.

38  
39  
40  
41  
42  
43  
44  
45  
46  
47  
48  
49  
50  
51 *Patient and Public Involvement.* As strictly a literature review, this study included no patient or  
52 public involvement.  
53  
54  
55  
56  
57  
58  
59  
60

## Results

This results section addresses the first aim of this scoping review: to summarize the literature on the topic of green space exposure and brain health across the life course.

### *Overall study characteristics*

The final sample included 22 papers (Figure 1, Tables 1-3, Supplemental Tables 1-3).<sup>9 36-56</sup>

Posthoc additions to the final sample included one paper previously known by the author<sup>36</sup> and one paper identified from the final sample reference lists.<sup>56</sup>

The large majority (82%) of studies were published on/after 2017 (range: 2012-2020). Eight studies were in the United Kingdom, with the remaining conducted in the US (2), Spain (4), China (4), New Zealand (1), Canada (2), Bulgaria (1), the Netherlands (1), and Germany (1) (one of the studies was conducted in Spain, UK, and the Netherlands). Eight studies focused on <18 year olds (childhood), seven studies focused on 18-64 year olds (adulthood), and 13 studies focused on ≥65 year olds (older adulthood).

### *Study designs and definitions*

Fourteen studies (64%) were based on population-based cohorts or random sampling strategies. Two studies examined life course associations, both investigating childhood and mid-life park space exposures and cognitive change in late-life.<sup>46 47</sup>

The green space measures included: 1) greenness measured using the normalized difference vegetation index (NDVI) or enhanced vegetation index (EVI); 2) tree canopy/cover measured using vegetation continuous fields (VCF); 3) neighborhood percentage park space or park area; 4) time spent in green space (objective or self-reported); 5) neighborhood percentage green space based on green land uses; 6) self-reported amount of natural environment near residence; and 7) distance from residence to natural outdoor environment. Most studies

1  
2  
3 measured green space in the residential neighborhood, although a few additionally measured  
4 green space surrounding schools and school routes.<sup>47 48</sup> No studies examined work area green  
5 spaces. NDVI was the most commonly used measure. The boundaries used to define green  
6 space exposures varied greatly (e.g., 100 to 1,500m radial buffers around residences, 1000m  
7 buffers around postcode centroids, US Census tracts, 50m buffers around school route).

8  
9  
10  
11  
12  
13  
14  
15  
16 The majority of studies (68%) examined cognitive function. A range of cognitive domains were  
17 assessed, including but not limited to global cognition, working memory, attention, reasoning,  
18 verbal fluency, and executive function. Five studies used the Mini Mental State Exam (MMSE),  
19 a global cognition screening test, while the remaining used a variety of other instruments. Four  
20 studies examined diagnosis of cognitive impairment or dementia (including Alzheimer's and  
21 Parkinson disease) and three focused on brain MRI. Eight studies used longitudinal data on  
22 brain health, but only five actually examined longitudinal changes in brain health (i.e., cognitive  
23 decline or dementia risk).

24  
25  
26  
27  
28  
29  
30  
31  
32  
33  
34  
35 Seventeen studies found associations (14 positive, four inverse) and five found no associations  
36 (Tables 1-3, Supplemental Tables 1-3). Twelve studies reported a combination of positive,  
37 inverse, and/or null associations. Almost all studies (95%) employed multivariable linear or  
38 logistic regression accounting for key confounders (i.e., age, sex, socioeconomic status [SES])  
39 and 59% used regression methods accounting for data clustering/multi-level data.

#### 40 41 42 43 44 45 46 47 *Findings by age group*

48  
49 *Children.* Five of the eight studies found associations (five positive, zero inverse) (Table 1,  
50 Supplemental Tables 1-3). Greater neighborhood greenness/green space was associated with  
51 working memory, attention, and intellectual development<sup>37 39 48 50</sup> and with specific brain  
52 regions<sup>49</sup>. Null associations were found between greater greenness/green space and  
53  
54  
55  
56  
57  
58  
59  
60

1  
2  
3 intelligence, alerting, orienting, executive processing/function, fluid ability, crystallized ability,  
4 working memory, and attention.<sup>46 48 51</sup> Time spent in green space measured via global  
5 positioning system (GPS) tracking was not associated with cognition.<sup>53</sup>  
6  
7

8  
9 *Adults (18-64 years)*. Five of the seven studies found associations (five positive, two inverse)  
10 (Table 2). Increased residential distance to natural outdoor environments was associated with  
11 longer cognitive test completion times<sup>45</sup>, and greater neighborhood greenness was positively  
12 and inversely associated with dementia diagnoses (detailed in “Older adults” section below).<sup>43</sup>  
13 Greater neighborhood greenness was cross-sectionally associated with better global cognition  
14 <sup>55</sup> and was associated with slower longitudinal decline on global cognition, reasoning, and  
15 verbal fluency.<sup>38</sup> Additionally, greater neighborhood green space was associated with greater  
16 cortical thickness in the prefrontal cortex, bilateral fusiform gyrus, left precuneus and insula, and  
17 right cuneus as measured via MRI.<sup>55</sup> Null associations were found between greater  
18 neighborhood greenness/green space and five-year change in greenness and measures of  
19 global cognition, intelligence, reaction time, reasoning, visual memory, and visual  
20 attention/executive processing.<sup>36 40 45 46</sup> No associations were found between self-reported visits  
21 to and time spent in natural environments and visual attention/executive processing<sup>45</sup>, and no  
22 associations were observed between greater greenness and cortical thickness on other brain  
23 MRI regions (e.g., right cuneus and insula).<sup>55</sup> Lastly, inverse associations were found between  
24 five-year change in neighborhood greenness and reasoning.<sup>40</sup>  
25  
26  
27  
28  
29  
30  
31  
32  
33  
34  
35  
36  
37  
38  
39  
40  
41  
42  
43  
44

45 *Older adults (≥65 years)*. Ten of 13 studies found associations (eight positive, three inverse)  
46 (Table 3). Greater neighborhood greenness was associated with lower risk of Alzheimer’s  
47 disease, non-Alzheimer’s disease and Parkinson’s disease diagnoses in some studies<sup>9 43</sup>, but  
48 increased risk of cognitive impairment and Alzheimer’s disease diagnoses in others<sup>41-43</sup>. Greater  
49 neighborhood greenness/green space was positively associated with intelligence, global  
50 cognition, reasoning, verbal fluency, and visual attention/executive processing<sup>5 45-47</sup>. In addition,  
51  
52  
53  
54  
55  
56  
57  
58  
59  
60

1  
2  
3 greater green space (i.e., forests) was associated with greater better amygdala integrity  
4 measured via MRI.<sup>56</sup> Null associations were found between neighborhood greenness/green  
5 space and intelligence, global cognition, short-term memory or visual attention/executive  
6 processing<sup>5 36 45-47 52 54</sup>. Time spent in natural environments was not associated with visual  
7 attention/executive processing<sup>45</sup>. Lastly, urban green space was not associated with brain  
8 integrity measured via MRI.<sup>56</sup>  
9  
10  
11  
12  
13  
14  
15

### 16 17 18 *Findings by green space measure*

19  
20 *NDVI*. Ten of 14 studies using NDVI found associations (ten positive, two inverse) (Table 2,  
21 Supplemental Tables 1-3). Of the studies with positive findings, two examined MRI brain  
22 measures and two examined risk/odds of cognitive impairment/dementia. The remaining studies  
23 with positive findings focused on various cognitive domain outcomes. In the studies with inverse  
24 associations, five-year NDVI increase was associated with worse reasoning in 40-69 year  
25 olds.<sup>40</sup>  
26  
27  
28  
29  
30  
31  
32  
33

34  
35 *Park space*. Two of three studies focused on percent/amount of residential park space found  
36 positive associations with change in cognition in late-life.<sup>46 47</sup> These positive associations were  
37 restricted to childhood and mid-life park space exposures and cognitive changes from ages 70  
38 to 76, with no associations observed between early- and mid-life exposures and cognitive  
39 changes from ages 11 to 76 or between late-life park space exposure and cognitive changes at  
40 any age (11-76 years). The third study found no associations between neighborhood park area  
41 and cognition.<sup>36</sup>  
42  
43  
44  
45  
46  
47  
48  
49

50  
51 *Other measures*. Measures of time spent in green space, based on objective GPS tracking<sup>53</sup> or  
52 self-reported<sup>45</sup>, were not associated with cognition. Positive associations were observed  
53 between percentage residential green space derived from land use data and spatial working  
54  
55  
56  
57  
58  
59  
60

1  
2  
3 memory<sup>39</sup>, and between distance to the nearest natural outdoor environment and visual  
4 attention/executive processing.<sup>45</sup> Greater amounts of forest surrounding the residence was  
5 associated with greater amygdala integrity, whereas amount of neighborhood urban green  
6 space was not associated with measures of brain integrity from MRI.<sup>56</sup> Percentage green space  
7 and private gardens based on land use data was inversely associated with cognitive  
8 impairment/dementia.<sup>41 42</sup> Tree canopy/cover (VCF) was not associated with attention in  
9 children.<sup>37</sup> Lastly, a self-reported measure of amount of residential natural environment was not  
10 associated with visual attention/executive processing.<sup>45</sup>  
11  
12  
13  
14  
15  
16  
17  
18  
19  
20  
21

### 22 *Findings by brain health measure*

23  
24 Ten studies found associations with cognition (10 positive, 1 inverse) (Table 3, Supplemental  
25 Tables 1-3). Greater greenness/green space was associated with global cognition, working  
26 memory, spatial working memory attention, visual attention, reasoning, fluency, and measures  
27 of intelligence and childhood intellectual development. The two studies using brain MRI found  
28 positive associations between greenness and multiple measures of regional brain  
29 volume/cortical thickness.<sup>49 56</sup> Two studies found positive associations between  
30 greenness/green space and Alzheimer's disease, non-Alzheimer's dementia, and Parkinson's  
31 disease diagnoses<sup>9 43</sup>, whereas three found inverse associations with Alzheimer's disease or  
32 dementia diagnoses<sup>41-43</sup>.  
33  
34  
35  
36  
37  
38  
39  
40  
41  
42  
43  
44

### 45 *Effect modification*

46  
47 Six of 11 studies found effect modification by age, sex, education, APOE genotype, adulthood  
48 occupation, neighborhood traffic accident density, area level deprivation, body mass index  
49 (BMI), and urbanicity (Supplemental Table 1).<sup>38 40 41 44 46 47 50</sup> Green space-brain health  
50 associations were stronger in/limited to women, APOE ε4 non-carriers, and those with lower  
51 occupational class, higher education levels, lower BMI, and younger age (in study of older  
52  
53  
54  
55  
56  
57  
58  
59  
60

adults). Associations also were stronger among residents of conurbations (urbanized area composed of multiple cities/towns), areas with lower traffic accident densities, and areas of higher deprivation. Other studies found no effect modification by neighborhood SES, sex, maternal education, residential stability/years in residence, race, marital status, city, or household income.<sup>9 37 39 40 47 48 50</sup>

### *Mediation*

Seven studies investigated mediation. Traffic-related air pollution (elemental carbon in residence) mediated associations between school greenness and working memory and attentiveness in children<sup>48</sup> and self-reported physical activity mediated associations between greater residential greenness and global cognition in older adults<sup>54</sup> (Supplemental Table 1). Associations between greater neighborhood greenness and better global cognition among middle-aged adults were mediated by lower waist circumference but not by systolic blood pressure, total cholesterol, glucose, air pollution (NO<sub>2</sub>), or traffic-related noise.<sup>55</sup> The other four studies found no mediation of green space-brain health associations by physical activity, social measures (e.g., interaction, loneliness), perceived mental health, traffic noise annoyance, worry about air pollution, or air pollution levels (i.e., PM<sub>2.5</sub>).<sup>36 38 45 50</sup>

### **Discussion**

Evidence was found for associations between green space exposure at various life stages and brain health. Seventy-one percent of NDVI studies (greenness) found positive associations. Greater neighborhood greenness/green space had positive associations with multiple cognitive domains, brain regions, and lower AD and non-Alzheimer's disease dementia risk. However, some studies found inverse or null associations, few studies were conducted within each major age group, and the studies employed limited and heterogeneous methods and definitions. The



1  
2  
3 remainder of this discussion section addresses the second aim of the scoping review, to identify  
4 scientific gaps for future research.  
5  
6  
7  
8  
9

### 10 11 *Brain health measures*

12  
13 The variety of brain health measures limits study comparisons. A diverse range of cognitive  
14 instruments were used and they assessed a range of cognitive domains. Measures of attention  
15 were associated with green space in more than one study<sup>37 45 48</sup>, but additional research is  
16 needed to confirm these associations. The studies more frequently assessed executive function,  
17 attention, and working memory, and less often examined short- or long-term memory,  
18 language/fluency, processing speed, or visuospatial function. The focus on the former cognitive  
19 domains may be due to data availability, but also potential hypothesized underlying  
20 mechanisms relating green space and brain health, in which green space exposure restores  
21 attention and reduces mental fatigue/stress. Green space exposures may be associated with  
22 other cognitive measures reflecting brain regions susceptible to green space-related  
23 behaviors/exposures. Episodic memory (e.g., memory of personal events) is the hallmark  
24 cognitive domain affected in those with AD, although other domains such as language/verbal  
25 fluency and visuospatial function may also be involved. These domains have been associated  
26 with AD risk factors such as physical activity, social engagement, and air pollution exposure in  
27 previous studies.<sup>57-59</sup> New studies are needed to assess green space associations with  
28 maintained or improved cognition in these domains.  
29  
30  
31  
32  
33  
34  
35  
36  
37  
38  
39  
40  
41  
42  
43  
44  
45  
46  
47  
48  
49

50 Greater greenness/green space displayed mixed associations (positive/inverse) with diagnoses  
51 of cognitive impairment or dementia. The mixed findings may be explained by the employed  
52 study methods, as three of the four studies were cross-sectional and none examined or  
53 controlled for early- and mid-life factors beyond educational attainment. Clinical diagnoses may  
54  
55  
56  
57  
58  
59  
60

1  
2  
3 be biased by cultural or education factors that may increase or decrease the chance of receiving  
4 a diagnosis irrespective of disease presence. For instance, minorities may be more likely to  
5 receive dementia diagnoses if educational and cultural differences are unaccounted for in  
6 cognitive testing or if a higher prevalence of comorbidities increases ADAD risk.<sup>60</sup> Nevertheless,  
7 diagnoses are clinically significant measures of brain health, particularly when made by  
8 specialists with expertise in discerning the presence and etiology of dementia, and thus are  
9 useful measures for future green space-brain health research in older adults.  
10  
11  
12  
13  
14  
15  
16  
17  
18  
19

20 To date, three studies investigated associations between green space and MRI biomarkers,  
21 specifically regional brain volumes, measures of integrity, and measures of cortical thickness  
22 obtained from structural MRI. Controlling for parent SES and neighborhood SES (separately),  
23 one study found green space associations with certain brain regions in school-age children.  
24 However, the study used an intensive method of analysis (examining associations for each 3-D  
25 pixel [voxel] of brain image) that significantly limited the number of confounders included in the  
26 multivariable analyses. An alternative to this voxel-wise analysis, which would allow for the  
27 control of multiple important confounders, is to measure brain health/atrophy using regional  
28 brain volumes (mm<sup>3</sup>) and cortical thickness determined through standardized segmentation  
29 techniques.<sup>61</sup> The findings for associations between greater greenness/green space and  
30 greater amygdala integrity and cortical thickness will need to be replicated. Measures of global  
31 brain atrophy from MRI, such as total grey matter volume or ventricular volume, may be a useful  
32 addition for future studies under the presumption that green space exposures result in overall  
33 healthier brain development and aging.  
34  
35  
36  
37  
38  
39  
40  
41  
42  
43  
44  
45  
46  
47  
48  
49  
50

### 51 *Green space measures*

52  
53 The reviewed studies suggest that NDVI is a valuable measure for future studies of green space  
54 and brain health. However, NDVI does not assess tree canopy/cover or other qualities of green  
55  
56  
57  
58  
59  
60

1  
2  
3 spaces (e.g., park amenities). A single study included a measure of tree canopy/cover and  
4  
5 found no association with brain health. Future work will need to consistently incorporate quality  
6  
7 measures such as tree canopy/cover, availability of park amenities (e.g., walking trails), and  
8  
9 safe walking routes/sidewalks, which will help identify types of green space environments most  
10  
11 effective at promoting brain health.  
12  
13

14  
15  
16 Studies measuring percentage of the neighborhood composed of green space (i.e., parks)  
17  
18 found positive, inverse, and null associations, warranting additional studies. Compared to NDVI  
19  
20 (greenness), percentage green space may better capture access to green spaces. Access may  
21  
22 be a stronger predictor of healthy behaviors such as physical activity, particularly among  
23  
24 socioeconomically disadvantaged individuals with limited resources and opportunities for  
25  
26 exercise. Other measures of access to green spaces should be developed and used (e.g.,  
27  
28 number of neighborhood parks) to determine the strongest predictors of both healthy behaviors  
29  
30 and better brain health.  
31  
32

33  
34  
35 The few studies incorporating self-reported measures of green space exposure found no  
36  
37 associations. Objective green space measures are necessary to suggest target amounts and  
38  
39 qualities of green space for interventions, plans, and policies. However, self-reported and  
40  
41 perceived measures may be useful in tandem with objective measures. Valid and reliable green  
42  
43 space questionnaires would minimize burden and data security concerns in attempting to derive  
44  
45 objective measures from residential addresses across the life span.  
46  
47

48  
49  
50 The majority of studies did not measure actual exposure to green spaces (i.e., time spent in  
51  
52 green spaces). Two studies measured time spent in green space via global position system  
53  
54 (GPS) tracking<sup>53</sup> or a few questions asked of participants.<sup>45</sup> Travel diaries for a given day/week  
55  
56 is an alternative not employed in the reviewed studies. Although studies have successfully  
57  
58  
59  
60

1  
2  
3 incorporated GPS to investigate neighborhood environmental exposures and outcomes  
4 including physical activity, the costs, difficulty in recruiting, participant time required, and non-  
5 compliance can be a hurdle. Despite these limitations, measures of time spent in green space  
6 provide the specificity of exposure needed to make informed decisions about green space-brain  
7 health associations.  
8  
9  
10  
11  
12

13  
14  
15  
16 Places for estimating green space exposures may depend on the age group under study.  
17  
18 Primary green space exposure may occur in residential and school environments among  
19 children; residential, working, and recreational environments among working adults; and  
20 residential and recreational environments among older adults. Two studies went beyond  
21 residential exposures to measure school and school route exposures.<sup>47 48</sup> Future studies will  
22 benefit from a more comprehensive view of places for green space exposures, and longitudinal  
23 studies following individuals progressing through these life stages should keep age-based  
24 differences in activity spaces in mind.  
25  
26  
27  
28  
29  
30  
31  
32  
33  
34

### 35 *Life course exposures*

36  
37 Many of the studies of middle- and older-aged adults were cross-sectional and lacked  
38 consideration of earlier life green space exposures. Childhood exposures may be most critical  
39 for determining late-life brain health by influencing healthy brain development. These  
40 neurodevelopmental benefits may impart cognitive reserve and resilience through older ages,  
41 which protects against ADAD neuropathology and resists symptoms despite neuropathology.  
42  
43 Green space exposure patterns during childhood may also establish healthy habits including  
44 physical activity that continue through adulthood to boost and maintain brain health. The  
45 importance of including childhood measures in future studies also applies to confounders such  
46 as early-life personal and neighborhood SES, which have been found to be associated with late-  
47 life cognitive health.<sup>62</sup>  
48  
49  
50  
51  
52  
53  
54  
55  
56  
57  
58  
59  
60

1  
2  
3  
4  
5 Some evidence suggests that mid-life behaviors may be stronger predictors of late-life cognitive  
6 decline and dementia risk than late-life behaviors.<sup>63 64</sup> In a similar fashion, green space  
7 exposures in mid-life versus late-life may be more strongly associated with late-life brain health.  
8  
9 Mid-life exposures are of particular interest because the neuropathology associated with ADAD  
10 often starts decades prior to symptom development (i.e., in mid-life).<sup>65</sup> During mid-life, green  
11 space-related behaviors/exposures such as physical activity may help resist the development of  
12 ADAD neuropathology or decrease the neuropathological burden.<sup>66</sup> Yet, even late-life green  
13 space exposures may help maintain brain health in older age, by providing accessible places  
14 that encourage exercise, relaxation, and socializing. Life course studies are needed to  
15 determine the critical periods of green space exposure related to late-life brain health and ADAD  
16 risk.  
17  
18  
19  
20  
21  
22  
23  
24  
25  
26  
27  
28  
29

### 30 *Causal mechanisms*

31  
32 In the reviewed papers, traffic-related air pollution and self-reported physical activity were found  
33 to be mediators, providing preliminary evidence for these two causal mechanisms. Future  
34 evaluation of mediation by physical activity should use rigorous, objective measures such as  
35 those obtained from accelerometers. Social engagement and related measures were not found  
36 to be mediators, and mental health (e.g., anxiety, depression) and immune function were not  
37 examined in any study. Altogether, few studies examined mediation and more work is needed to  
38 determine causal pathways for green space-brain health associations.  
39  
40  
41  
42  
43  
44  
45  
46  
47  
48

### 49 *New research directions*

50  
51 New studies will need to incorporate longitudinal measures of green space (accumulation of  
52 exposures and changes over time) and brain health. GPS-based measures of green activity  
53 spaces and time spent in green spaces will improve the quantification of green space  
54  
55  
56  
57  
58  
59  
60

1  
2  
3 exposures. Use of brain biomarkers such as MRI, positron emission tomography (PET) scans,  
4 and cerebrospinal fluid biomarkers to detect brain neurodegeneration/ADAD may provide  
5 biological evidence for associations. Green space exposures should temporally precede the  
6 brain health measures, and the validity and reliability of green space measures need to be  
7 established. Causal mechanisms need to be delineated through the investigation of potential  
8 mediators. In addition, taking advantage of natural experiments such as planned green space  
9 additions will strengthen the evidence base.  
10  
11  
12  
13  
14  
15  
16  
17  
18  
19

20 Future studies will need to consider other factors insufficiently examined to date, including the  
21 potential impact of residential moves, seasonality of exposure/regional climate, bias due to self-  
22 selection into greener neighborhoods, and neighborhood-level confounders (e.g., crime,  
23 population density). Research is needed on the pertinent places (e.g., neighborhood, work,  
24 recreational) and boundaries (e.g., 1,000m buffer) for green space exposures. Future studies  
25 need to determine if positive associations are present irrespective of race/ethnicity and culture,  
26 by demonstrating associations in multiple international contexts and within multiple regions of  
27 diverse countries such as the US.  
28  
29  
30  
31  
32  
33  
34  
35  
36  
37  
38

### 39 *Limitations*

40  
41 This review may be limited by positive publication bias. Additional papers may have been  
42 obtained if different databases were searched, although the review of reference lists and  
43 systematic green space-health reviews reduced the possibility. Many of the studies lacked  
44 consideration of early-life green space exposures and few examined actual time spent in green  
45 spaces, and thus, most were likely affected by misclassification/information bias. Selection bias  
46 was likely also at play in many of the studies, which were frequently restricted to a reduced  
47 sample size based on those with available data on exposures/outcomes. As this was a scoping  
48  
49  
50  
51  
52  
53  
54  
55  
56  
57  
58  
59  
60

1  
2  
3 review, it was never intended to systematically evaluate the evidence for risk for bias, which will  
4  
5 be reserved for quantitative systematic reviews.  
6  
7  
8  
9

### 10 11 *Conclusion*

12  
13 This rapid scoping review identified twenty-two studies of green space and brain health. The  
14 majority of studies were cross-sectional and the green space and brain health measures were  
15 heterogeneous. Despite these limitations, multiple studies investigating neighborhood  
16 greenness found positive associations with brain health outcomes at various life course stages.  
17  
18 Thus, the evidence is suggestive that green space is associated with brain health, and  
19 additional research is warranted based on these preliminary studies. The observed positive  
20 associations need to be replicated in longitudinal and life course studies of diverse cohorts and  
21 studies will need to expand upon and strengthen the methods employed in the extant literature,  
22 to build the case for community-level green space interventions that may help maintain/improve  
23 cognition, impart brain resilience, and reduce ADAD risk in late-life.  
24  
25  
26  
27  
28  
29  
30  
31  
32  
33  
34  
35  
36  
37  
38  
39  
40  
41  
42  
43  
44  
45  
46  
47  
48  
49  
50  
51  
52  
53  
54  
55  
56  
57  
58  
59  
60

**Contributor statement**

Dr. Besser is the sole author of this study and conducted all aspects of the study and writing.

**Competing Interests**

The author has no competing interests to declare.

**Funding**

Dr. Besser is supported by National Institutes of Health/National Institute on Aging award K01AG063895.

**Data sharing statement:**

No data sets were used/analyzed in this study.



## References

1. Frumkin H, Bratman GN, Breslow SJ, et al. Nature Contact and Human Health: A Research Agenda. *Environ Health Perspect* 2017;125(7):075001. doi: 10.1289/EHP1663 [published Online First: 2017/08/11]
2. Hartig T, Mitchell R, de Vries S, et al. Nature and health. *Annu Rev Public Health* 2014;35:207-28. doi: 10.1146/annurev-publhealth-032013-182443 [published Online First: 2014/01/07]
3. Twohig-Bennett C, Jones A. The health benefits of the great outdoors: A systematic review and meta-analysis of greenspace exposure and health outcomes. *Environ Res* 2018;166:628-37. doi: 10.1016/j.envres.2018.06.030 [published Online First: 2018/07/10]
4. Gascon M, Triguero-Mas M, Martinez D, et al. Residential green spaces and mortality: A systematic review. *Environ Int* 2016;86:60-7. doi: 10.1016/j.envint.2015.10.013 [published Online First: 2015/11/06]
5. de Keijzer C, Gascon M, Nieuwenhuijsen MJ, et al. Long-Term Green Space Exposure and Cognition Across the Life Course: a Systematic Review. *Current environmental health reports* 2016;3(4):468-77. doi: 10.1007/s40572-016-0116-x [published Online First: 2016/10/13]
6. Fong KC, Hart JE, James P. A Review of Epidemiologic Studies on Greenness and Health: Updated Literature Through 2017. *Curr Environ Health Rep* 2018;5(1):77-87. doi: 10.1007/s40572-018-0179-y [published Online First: 2018/02/03]
7. Vanaken GJ, Danckaerts M. Impact of Green Space Exposure on Children's and Adolescents' Mental Health: A Systematic Review. *Int J Environ Res Public Health* 2018;15(12) doi: 10.3390/ijerph15122668 [published Online First: 2018/11/30]
8. Hankey S, Marshall JD. Urban Form, Air Pollution, and Health. *Curr Environ Health Rep* 2017;4(4):491-503. doi: 10.1007/s40572-017-0167-7 [published Online First: 2017/10/21]

- 1  
2  
3 9. Brown SC, Perrino T, Lombard J, et al. Health Disparities in the Relationship of Neighborhood  
4  
5 Greenness to Mental Health Outcomes in 249,405 U.S. Medicare Beneficiaries. *Int J Environ Res*  
6  
7 *Public Health* 2018;15(3) doi: 10.3390/ijerph15030430 [published Online First: 2018/03/02]  
8  
9
- 10 10. Roberts R, Knopman DS. Classification and epidemiology of MCI. *Clin Geriatr Med* 2013;29(4):753-72.  
11  
12 doi: 10.1016/j.cger.2013.07.003 [published Online First: 2013/10/08]  
13
- 14 11. World Health Organization. Dementia [Available from: [https://www.who.int/news-room/fact-](https://www.who.int/news-room/fact-sheets/detail/dementia)  
15  
16 [sheets/detail/dementia](https://www.who.int/news-room/fact-sheets/detail/dementia) accessed 2/10/2020.  
17
- 18 12. Baumgart M, Snyder HM, Carrillo MC, et al. Summary of the evidence on modifiable risk factors for  
19  
20 cognitive decline and dementia: A population-based perspective. *Alzheimers Dement*  
21  
22 2015;11(6):718-26. doi: 10.1016/j.jalz.2015.05.016 [published Online First: 2015/06/06]  
23  
24
- 25 13. Jack CR, Jr., Bennett DA, Blennow K, et al. NIA-AA Research Framework: Toward a biological  
26  
27 definition of Alzheimer's disease. *Alzheimers Dement* 2018;14(4):535-62. doi:  
28  
29 10.1016/j.jalz.2018.02.018 [published Online First: 2018/04/15]  
30  
31
- 32 14. Montine TJ, Monsell SE, Beach TG, et al. Multisite assessment of NIA-AA guidelines for the  
33  
34 neuropathologic evaluation of Alzheimer's disease. *Alzheimers Dement* 2016;12(2):164-69. doi:  
35  
36 10.1016/j.jalz.2015.07.492 [published Online First: 2015/08/29]  
37  
38
- 39 15. Apostolova LG, Green AE, Babakchanian S, et al. Hippocampal atrophy and ventricular enlargement  
40  
41 in normal aging, mild cognitive impairment (MCI), and Alzheimer Disease. *Alzheimer Dis Assoc*  
42  
43 *Disord* 2012;26(1):17-27. doi: 10.1097/WAD.0b013e3182163b62 [published Online First:  
44  
45 2012/02/22]  
46  
47
- 48 16. Liu S, Liu J, Wang XD, et al. Caregiver burden, sleep quality, depression, and anxiety in dementia  
49  
50 caregivers: a comparison of frontotemporal lobar degeneration, dementia with Lewy bodies,  
51  
52 and Alzheimer's disease. *Int Psychogeriatr* 2017:1-8. doi: 10.1017/S1041610217002630  
53  
54 [published Online First: 2017/12/11]  
55  
56  
57  
58  
59  
60

- 1  
2  
3 17. Galvin JE, Howard DH, Denny SS, et al. The social and economic burden of frontotemporal  
4 degeneration. *Neurology* 2017;89(20):2049-56. doi: 10.1212/WNL.0000000000004614  
5  
6 [published Online First: 2017/10/06]  
7  
8  
9  
10 18. Alzheimer's Association. 2020 Alzheimer's Disease Facts and Figures 2020 [Available from:  
11  
12 <https://www.alz.org/media/Documents/alzheimers-facts-and-figures.pdf> accessed 05/08/2020.  
13  
14 19. Berto R. The role of nature in coping with psycho-physiological stress: a literature review on  
15  
16 restorativeness. *Behav Sci (Basel)* 2014;4(4):394-409. doi: 10.3390/bs4040394 [published Online  
17  
18 First: 2014/11/29]  
19  
20  
21 20. Stevenson MP, Schilhab T, Bentsen P. Attention Restoration Theory II: a systematic review to clarify  
22  
23 attention processes affected by exposure to natural environments. *Journal of toxicology and*  
24  
25 *environmental health Part B, Critical reviews* 2018;21(4):227-68. doi:  
26  
27 10.1080/10937404.2018.1505571 [published Online First: 2018/08/22]  
28  
29  
30 21. Pasanen T, Johnson K, Lee K, et al. Can Nature Walks With Psychological Tasks Improve Mood, Self-  
31  
32 Reported Restoration, and Sustained Attention? Results From Two Experimental Field Studies.  
33  
34 *Front Psychol* 2018;9:2057. doi: 10.3389/fpsyg.2018.02057 [published Online First: 2018/11/15]  
35  
36  
37 22. Kessing LV. Depression and the risk for dementia. *Curr Opin Psychiatry* 2012;25(6):457-61. doi:  
38  
39 10.1097/YCO.0b013e328356c368 [published Online First: 2012/07/18]  
40  
41  
42 23. Ruokolainen L, von Hertzen L, Fyhrquist N, et al. Green areas around homes reduce atopic  
43  
44 sensitization in children. *Allergy* 2015;70(2):195-202. doi: 10.1111/all.12545 [published Online  
45  
46 First: 2014/11/13]  
47  
48 24. Sun M, Ma K, Wen J, et al. A Review of the Brain-Gut-Microbiome Axis and the Potential Role of  
49  
50 Microbiota in Alzheimer's Disease. *J Alzheimers Dis* 2020;73(3):849-65. doi: 10.3233/JAD-190872  
51  
52 [published Online First: 2019/12/31]  
53  
54  
55  
56  
57  
58  
59  
60

- 1  
2  
3 25. Dalton AM, Wareham N, Griffin S, et al. Neighbourhood greenspace is associated with a slower  
4  
5 decline in physical activity in older adults: A prospective cohort study. *SSM Popul Health*  
6  
7 2016;2:683-91. doi: 10.1016/j.ssmph.2016.09.006 [published Online First: 2016/12/27]  
8  
9
- 10 26. Bancroft C, Joshi S, Rundle A, et al. Association of proximity and density of parks and objectively  
11  
12 measured physical activity in the United States: A systematic review. *Soc Sci Med* 2015;138:22-  
13  
14 30. doi: 10.1016/j.socscimed.2015.05.034 [published Online First: 2015/06/05]  
15  
16
- 17 27. Tan ZS, Spartano NL, Beiser AS, et al. Physical Activity, Brain Volume, and Dementia Risk: The  
18  
19 Framingham Study. *J Gerontol A Biol Sci Med Sci* 2017;72(6):789-95. doi:  
20  
21 10.1093/gerona/glw130 [published Online First: 2016/07/17]  
22
- 23 28. Kirk-Sanchez NJ, McGough EL. Physical exercise and cognitive performance in the elderly: current  
24  
25 perspectives. *Clin Interv Aging* 2014;9:51-62. doi: 10.2147/CIA.S39506 [published Online First:  
26  
27 2014/01/01]  
28  
29
- 30 29. Jennings V, Bamkole O. The Relationship between Social Cohesion and Urban Green Space: An  
31  
32 Avenue for Health Promotion. *Int J Environ Res Public Health* 2019;16(3) doi:  
33  
34 10.3390/ijerph16030452 [published Online First: 2019/02/06]  
35  
36
- 37 30. Krueger KR, Wilson RS, Kamenetsky JM, et al. Social engagement and cognitive function in old age.  
38  
39 *Exp Aging Res* 2009;35(1):45-60. doi: 10.1080/03610730802545028  
40
- 41 31. Marioni RE, Proust-Lima C, Amieva H, et al. Social activity, cognitive decline and dementia risk: a 20-  
42  
43 year prospective cohort study. *BMC Public Health* 2015;15:1089. doi: 10.1186/s12889-015-2426-  
44  
45 6 [published Online First: 2015/10/27]  
46  
47
- 48 32. Midouhas E, Kokosi T, Flouri E. Neighbourhood-level air pollution and greenspace and inflammation  
49  
50 in adults. *Health Place* 2019;58:102167. doi: 10.1016/j.healthplace.2019.102167 [published  
51  
52 Online First: 2019/07/22]  
53  
54  
55  
56  
57  
58  
59  
60

- 1  
2  
3 33. Datzmann T, Markevych I, Trautmann F, et al. Outdoor air pollution, green space, and cancer  
4 incidence in Saxony: a semi-individual cohort study. *BMC Public Health* 2018;18(1):715. doi:  
5 10.1186/s12889-018-5615-2 [published Online First: 2018/06/10]  
6  
7  
8  
9  
10 34. Peters R, Ee N, Peters J, et al. Air Pollution and Dementia: A Systematic Review. *J Alzheimers Dis* 2019  
11 doi: 10.3233/JAD-180631 [published Online First: 2019/02/19]  
12  
13  
14 35. Munn Z, Peters MDJ, Stern C, et al. Systematic review or scoping review? Guidance for authors when  
15 choosing between a systematic or scoping review approach. *BMC Med Res Methodol*  
16 2018;18(1):143. doi: 10.1186/s12874-018-0611-x [published Online First: 2018/11/21]  
17  
18  
19  
20  
21 36. Clarke PJ, Ailshire JA, House JS, et al. Cognitive function in the community setting: the  
22 neighbourhood as a source of 'cognitive reserve'? *J Epidemiol Community Health*  
23 2012;66(8):730-6. doi: 10.1136/jech.2010.128116 [published Online First: 2011/04/26]  
24  
25  
26  
27  
28 37. Dadvand P, Tischer C, Estarlich M, et al. Lifelong Residential Exposure to Green Space and Attention:  
29 A Population-based Prospective Study. *Environ Health Perspect* 2017;125(9):097016. doi:  
30 10.1289/EHP694 [published Online First: 2017/09/22]  
31  
32  
33  
34 38. de Keijzer C, Tonne C, Basagana X, et al. Residential Surrounding Greenness and Cognitive Decline: A  
35 10-Year Follow-up of the Whitehall II Cohort. *Environ Health Perspect* 2018;126(7):077003. doi:  
36 10.1289/EHP2875 [published Online First: 2018/07/22]  
37  
38  
39  
40  
41 39. Flouri E, Papachristou E, Midouhas E. The role of neighbourhood greenspace in children's spatial  
42 working memory. *The British journal of educational psychology* 2019;89(2):359-73. doi:  
43 10.1111/bjep.12243 [published Online First: 2018/09/07]  
44  
45  
46  
47  
48 40. Hystad P PY, Noisel N, Boileau C. Green space associations with mental health and cognitive  
49 function: Results from the Quebec CARTaGENE cohort. *Environmental Epidemiology*  
50 2019;3:e040.  
51  
52  
53  
54  
55  
56  
57  
58  
59  
60

- 1  
2  
3 41. Wu YT, Prina AM, Jones A, et al. The Built Environment and Cognitive Disorders: Results From the  
4  
5 Cognitive Function and Ageing Study II. *Am J Prev Med* 2017 doi: 10.1016/j.amepre.2016.11.020  
6  
7 [published Online First: 2017/01/09]  
8  
9
- 10 42. Wu YT, Prina AM, Jones AP, et al. Community environment, cognitive impairment and dementia in  
11  
12 later life: results from the Cognitive Function and Ageing Study. *Age Ageing* 2015;44(6):1005-11.  
13  
14 doi: 10.1093/ageing/afv137 [published Online First: 2015/10/16]  
15  
16
- 17 43. Yuchi W, Sbihi H, Davies H, et al. Road proximity, air pollution, noise, green space and neurologic  
18  
19 disease incidence: a population-based cohort study. *Environ Health* 2020;19(1):8. doi:  
20  
21 10.1186/s12940-020-0565-4 [published Online First: 2020/01/23]  
22  
23
- 24 44. Zhu A, Yan L, Shu C, et al. APOE epsilon4 Modifies Effect of Residential Greenness on Cognitive  
25  
26 Function among Older Adults: A Longitudinal Analysis in China. *Scientific reports* 2020;10(1):82.  
27  
28 doi: 10.1038/s41598-019-57082-7 [published Online First: 2020/01/11]  
29
- 30 45. Zijlema WL, Triguero-Mas M, Smith G, et al. The relationship between natural outdoor environments  
31  
32 and cognitive functioning and its mediators. *Environ Res* 2017;155:268-75. doi:  
33  
34 10.1016/j.envres.2017.02.017 [published Online First: 2017/03/04]  
35  
36
- 37 46. Cherrie MPC, Shortt NK, Mitchell RJ, et al. Green space and cognitive ageing: A retrospective life  
38  
39 course analysis in the Lothian Birth Cohort 1936. *Soc Sci Med* 2018;196:56-65. doi:  
40  
41 10.1016/j.socscimed.2017.10.038 [published Online First: 2017/11/13]  
42  
43
- 44 47. Cherrie MPC, Shortt NK, Ward Thompson C, et al. Association Between the Activity Space Exposure  
45  
46 to Parks in Childhood and Adolescence and Cognitive Aging in Later Life. *Int J Environ Res Public*  
47  
48 *Health* 2019;16(4) doi: 10.3390/ijerph16040632 [published Online First: 2019/02/24]  
49
- 50 48. Dadvand P, Nieuwenhuijsen MJ, Esnaola M, et al. Green spaces and cognitive development in  
51  
52 primary schoolchildren. *Proc Natl Acad Sci U S A* 2015;112(26):7937-42. doi:  
53  
54 10.1073/pnas.1503402112 [published Online First: 2015/06/17]  
55  
56  
57  
58  
59  
60

- 1  
2  
3 49. Dadvand P, Pujol J, Macia D, et al. The Association between Lifelong Greenspace Exposure and 3-  
4 Dimensional Brain Magnetic Resonance Imaging in Barcelona Schoolchildren. *Environ Health*  
5 *Perspect* 2018;126(2):027012. doi: 10.1289/EHP1876 [published Online First: 2018/03/06]  
6  
7  
8  
9  
10 50. Liao J, Zhang B, Xia W, et al. Residential exposure to green space and early childhood  
11 neurodevelopment. *Environment international* 2019;128:70-76. doi:  
12 10.1016/j.envint.2019.03.070 [published Online First: 2019/04/29]  
13  
14  
15  
16 51. Reuben A, Arseneault L, Belsky DW, et al. Residential neighborhood greenery and children's  
17 cognitive development. *Social science & medicine (1982)* 2019;230:271-79. doi:  
18 10.1016/j.socscimed.2019.04.029 [published Online First: 2019/04/30]  
19  
20  
21  
22  
23 52. Wang D, Lau KK, Yu R, et al. Neighbouring green space and mortality in community-dwelling elderly  
24 Hong Kong Chinese: a cohort study. *BMJ open* 2017;7(7):e015794. doi: 10.1136/bmjopen-2016-  
25 015794 [published Online First: 2017/08/03]  
26  
27  
28  
29  
30 53. Ward JS, Duncan JS, Jarden A, et al. The impact of children's exposure to greenspace on physical  
31 activity, cognitive development, emotional wellbeing, and ability to appraise risk. *Health Place*  
32 2016;40:44-50. doi: 10.1016/j.healthplace.2016.04.015 [published Online First: 2016/05/15]  
33  
34  
35  
36  
37 54. Yu R, Wang D, Leung J, et al. Is Neighborhood Green Space Associated With Less Frailty? Evidence  
38 From the Mr. and Ms. Os (Hong Kong) Study. *Journal of the American Medical Directors*  
39 *Association* 2018;19(6):528-34. doi: 10.1016/j.jamda.2017.12.015 [published Online First:  
40 2018/02/07]  
41  
42  
43  
44  
45 55. Dzhambov AM, Bahchevanov KM, Chompalov KA, et al. A feasibility study on the association  
46 between residential greenness and neurocognitive function in middle-aged Bulgarians. *Arh Hig*  
47 *Rada Toksiko* 2019;70(3):173-85. doi: 10.2478/aiht-2019-70-3326  
48  
49  
50  
51  
52  
53  
54  
55  
56  
57  
58  
59  
60

- 1  
2  
3 56. Kuhn S, Duzel S, Eibich P, et al. In search of features that constitute an "enriched environment" in  
4  
5 humans: Associations between geographical properties and brain structure. *Scientific reports*  
6  
7 2017;7 doi: ARTN 1192010.1038/s41598-017-12046-7  
8  
9
- 10 57. Krell-Roesch J, Vemuri P, Pink A, et al. Association Between Mentally Stimulating Activities in Late  
11  
12 Life and the Outcome of Incident Mild Cognitive Impairment, With an Analysis of the APOE  
13  
14 epsilon4 Genotype. *JAMA Neurol* 2017;74(3):332-38. doi: 10.1001/jamaneurol.2016.3822  
15  
16 [published Online First: 2017/01/31]  
17  
18
- 19 58. Cleary EG, Cifuentes M, Grinstein G, et al. Association of Low-Level Ozone with Cognitive Decline in  
20  
21 Older Adults. *J Alzheimers Dis* 2018;61(1):67-78. doi: 10.3233/JAD-170658 [published Online  
22  
23 First: 2017/11/06]  
24  
25
- 26 59. Podewils LJ, Guallar E, Kuller LH, et al. Physical activity, APOE genotype, and dementia risk: findings  
27  
28 from the Cardiovascular Health Cognition Study. *Am J Epidemiol* 2005;161(7):639-51. doi:  
29  
30 10.1093/aje/kwi092 [published Online First: 2005/03/23]  
31  
32
- 33 60. Chin AL, Negash S, Hamilton R. Diversity and disparity in dementia: the impact of ethnoracial  
34  
35 differences in Alzheimer disease. *Alzheimer Dis Assoc Disord* 2011;25(3):187-95. doi:  
36  
37 10.1097/WAD.0b013e318211c6c9 [published Online First: 2011/03/15]  
38  
39
- 40 61. Ledig C, Schuh A, Guerrero R, et al. Structural brain imaging in Alzheimer's disease and mild cognitive  
41  
42 impairment: biomarker analysis and shared morphometry database. *Sci Rep* 2018;8(1):11258.  
43  
44 doi: 10.1038/s41598-018-29295-9 [published Online First: 2018/07/28]  
45  
46
- 47 62. Letellier N, Gutierrez LA, Carriere I, et al. Sex-specific association between neighborhood  
48  
49 characteristics and dementia: The Three-City cohort. *Alzheimers Dement* 2018;14(4):473-82. doi:  
50  
51 10.1016/j.jalz.2017.09.015 [published Online First: 2017/11/06]  
52  
53  
54  
55  
56  
57  
58  
59  
60



- 1  
2  
3 63. Anstey KJ, Cherbuin N, Budge M, et al. Body mass index in midlife and late-life as a risk factor for  
4  
5 dementia: a meta-analysis of prospective studies. *Obes Rev* 2011;12(5):e426-37. doi:  
6  
7 10.1111/j.1467-789X.2010.00825.x [published Online First: 2011/02/26]  
8  
9  
10 64. Joas E, Bäckman K, Gustafson D, et al. Blood pressure trajectories from midlife to late life in relation  
11  
12 to dementia in women followed for 37 years. *Hypertension* 2012;59(4):796-801. doi:  
13  
14 10.1161/hypertensionaha.111.182204  
15  
16 65. Irwin K, Sexton C, Daniel T, et al. Healthy Aging and Dementia: Two Roads Diverging in Midlife? *Front*  
17  
18 *Aging Neurosci* 2018;10:275. doi: 10.3389/fnagi.2018.00275 [published Online First:  
19  
20 2018/10/05]  
21  
22  
23 66. Brown BM, Peiffer J, Rainey-Smith SR. Exploring the relationship between physical activity, beta-  
24  
25 amyloid and tau: A narrative review. *Ageing Res Rev* 2019;50:9-18. doi:  
26  
27 10.1016/j.arr.2019.01.003 [published Online First: 2019/01/08]  
28  
29  
30  
31  
32  
33  
34  
35  
36  
37  
38  
39  
40  
41  
42  
43  
44  
45  
46  
47  
48  
49  
50  
51  
52  
53  
54  
55  
56  
57  
58  
59  
60

**Figure caption**

Figure 1. Sample size flow diagram

For peer review only

Table 1. Summary of green space-brain health associations by age group

| Citation <sup>a</sup>      | Population based/<br>random sample | Location                  | Children<br>(<18 years) | Adults<br>(18-64 years) | Older adults<br>(≥65 years) |
|----------------------------|------------------------------------|---------------------------|-------------------------|-------------------------|-----------------------------|
| Brown (2018)               | Yes                                | US                        |                         |                         | +                           |
| Cherrie (2018)             | Yes                                | UK                        | N                       | N                       | +                           |
| Cherrie (2019)             | Yes                                | UK                        |                         |                         | + N                         |
| Clarke (2012)              | Yes                                | US                        |                         | N                       | N                           |
| Dadvand (2015)             | No                                 | Spain                     | + N                     |                         |                             |
| Dadvand (2017)             | Yes                                | Spain                     | + N                     |                         |                             |
| Dadvand (2018)             | No                                 | Spain                     | + N                     |                         |                             |
| Dzhambov (2019)            | No                                 | Bulgaria                  |                         | +N                      |                             |
| De Keijzer (2018)          | Yes                                | UK                        |                         | + N                     | + N                         |
| Flouri (2019)              | Yes                                | UK                        | +                       |                         |                             |
| Hystad (2019)              | Yes                                | Canada                    |                         | - N                     |                             |
| Kuhn (2017)                | No                                 | Germany                   |                         |                         | +N                          |
| Liao (2019)                | No                                 | China                     | +                       |                         |                             |
| Reuben (2019)              | Yes                                | UK                        | N                       |                         |                             |
| Wang (2017)                | No                                 | China                     |                         |                         | N                           |
| Ward (2016)                | No                                 | New Zealand               | N                       |                         |                             |
| Wu (2015)                  | Yes                                | UK                        |                         |                         | -                           |
| Wu (2017)                  | Yes                                | UK                        |                         |                         | -                           |
| Yu (2018)                  | No                                 | China                     |                         |                         | N                           |
| Yuchi (2020)               | Yes                                | Canada                    |                         | + -                     | + -                         |
| Zhu (2020)                 | Yes                                | China                     |                         |                         | +                           |
| Zijlema (2017)             | No                                 | Spain, UK,<br>Netherlands |                         | + N                     | + N                         |
| Total significant studies: |                                    |                           | 5 of 8                  | 5 of 7                  | 10 of 13                    |

Abbreviations: + = positive association; - = inverse association; N = null association

<sup>a</sup> Full list of papers found in Supplemental Text 1

Table 2. Summary of green space-brain health associations by green space measure

| Citation <sup>a</sup>      | Pop. based/<br>random sample | Location               | Longitudinal green space | Green space measures  |                         |                     |                           |                                         |                   |
|----------------------------|------------------------------|------------------------|--------------------------|-----------------------|-------------------------|---------------------|---------------------------|-----------------------------------------|-------------------|
|                            |                              |                        |                          | Greenness (NDVI, EVI) | Percent/area park space | Percent green space | Time spent in green space | Distance to natural outdoor environment | Other green space |
| Brown (2018)               | Yes                          | US                     | No                       | +                     |                         |                     |                           |                                         |                   |
| Cherrie (2018)             | Yes                          | UK                     | Yes                      |                       | + N                     |                     |                           |                                         |                   |
| Cherrie (2019)             | Yes                          | UK                     | Yes                      |                       | + N                     |                     |                           |                                         |                   |
| Clarke (2012)              | Yes                          | US                     | No                       |                       | N                       |                     |                           |                                         |                   |
| Dadvand (2015)             | No                           | Spain                  | No                       | + N                   |                         |                     |                           |                                         |                   |
| Dadvand (2017)             | Yes                          | Spain                  | Yes                      | + N                   |                         |                     |                           |                                         |                   |
| Dadvand (2018)             | No                           | Spain                  | Yes                      | + N                   |                         |                     |                           |                                         |                   |
| De Keijzer (2018)          | Yes                          | UK                     | Yes                      | + N                   |                         |                     |                           |                                         |                   |
| Dzhambov (2019)            | No                           | Bulgaria               | No                       | + -                   |                         |                     |                           |                                         |                   |
| Flouri (2019)              | Yes                          | UK                     | No                       |                       |                         | +                   |                           |                                         |                   |
| Hystad (2019)              | Yes                          | Canada                 | Yes                      | - N                   |                         |                     |                           |                                         |                   |
| Kuhn (2017)                | No                           | Germany                | No                       |                       |                         | +N                  |                           |                                         |                   |
| Liao (2019)                | No                           | China                  | No                       | +                     |                         |                     |                           |                                         |                   |
| Reuben (2019)              | Yes                          | UK                     | Yes                      | N                     |                         |                     |                           |                                         |                   |
| Wang (2017)                | No                           | China                  | No                       | N                     |                         |                     |                           |                                         |                   |
| Ward (2016)                | No                           | New Zealand            | No                       |                       |                         |                     | N                         |                                         |                   |
| Wu (2015)                  | Yes                          | UK                     | No                       |                       |                         | -                   |                           |                                         |                   |
| Wu (2017)                  | Yes                          | UK                     | No                       |                       |                         | - N                 |                           |                                         |                   |
| Yu (2018)                  | No                           | China                  | No                       | N                     |                         |                     |                           |                                         |                   |
| Yuchi (2020)               | Yes                          | Canada                 | Yes                      | + -                   |                         |                     |                           |                                         |                   |
| Zhu (2020)                 | Yes                          | China                  | Yes                      | +                     |                         |                     |                           |                                         |                   |
| Zijlema (2017)             | No                           | Spain, UK, Netherlands | No                       | N                     |                         |                     | N                         | +                                       | N                 |
| Total significant studies: |                              |                        |                          | 10 of 14              | 2 of 3                  | 4 of 4              | 0 of 2                    | 1 of 1                                  | 0 of 1            |

Abbreviations: NDVI = normalized difference vegetation index; EVI = enhanced vegetation index; + = positive association; - = inverse association; N = null association

<sup>a</sup> Full list of papers found in Supplemental Text 1

Table 3. Summary of green space-brain health associations by brain health measure

| Citation <sup>a</sup>      | Population based / random sample | Location               | Longitudinal brain health measure | Cognition | MRI brain regions | Diagnosis of cognitive impairment/ dementia |
|----------------------------|----------------------------------|------------------------|-----------------------------------|-----------|-------------------|---------------------------------------------|
| Brown (2018)               | Yes                              | US                     | No                                |           |                   | +                                           |
| Cherrie (2018)             | Yes                              | UK                     | Yes                               | + N       |                   |                                             |
| Cherrie (2019)             | Yes                              | UK                     | Yes                               | + N       |                   |                                             |
| Clarke (2012)              | Yes                              | US                     | No                                | N         |                   |                                             |
| Dadvand (2015)             | No                               | Spain                  | Yes                               | + N       |                   |                                             |
| Dadvand (2017)             | Yes                              | Spain                  | Yes                               | + N       |                   |                                             |
| Dadvand (2018)             | No                               | Spain                  | No                                |           | + N               |                                             |
| De Keijzer (2018)          | Yes                              | UK                     | Yes                               | + N       |                   |                                             |
| Flouri (2019)              | Yes                              | UK                     | No                                | +         |                   |                                             |
| Dzhambov (2019)            | No                               | Bulgaria               | No                                | +         | +N                |                                             |
| Hystad (2019)              | Yes                              | Canada                 | No                                | - N       |                   |                                             |
| Kuhn (2017)                | No                               | Germany                | No                                |           | +N                |                                             |
| Liao (2019)                | No                               | China                  | No                                | +         |                   |                                             |
| Reuben (2019)              | Yes                              | UK                     | Yes                               | N         |                   |                                             |
| Wang (2017)                | No                               | China                  | No                                | N         |                   |                                             |
| Ward (2016)                | No                               | New Zealand            | No                                | N         |                   |                                             |
| Wu (2015)                  | Yes                              | UK                     | No                                |           |                   | -                                           |
| Wu (2017)                  | Yes                              | UK                     | No                                |           |                   | - N                                         |
| Yu (2018)                  | No                               | China                  | No                                | N         |                   |                                             |
| Yuchi (2020)               | Yes                              | Canada                 | Yes                               |           |                   | + -                                         |
| Zhu (2020)                 | Yes                              | China                  | Yes                               |           |                   | +                                           |
| Zijlema (2017)             | No                               | Spain, UK, Netherlands | No                                | + N       |                   |                                             |
| Total significant studies: |                                  |                        |                                   | 10 of 15  | 3 of 3            | 4 of 4                                      |

Abbreviations: + = positive association; - = inverse association; N = null association

<sup>a</sup> Full list of papers found in Supplemental Text 1

1  
2  
3  
4  
5  
6  
7  
8  
9  
10  
11  
12  
13  
14  
15  
16  
17  
18  
19  
20  
21  
22  
23  
24  
25  
26  
27  
28  
29  
30  
31  
32  
33  
34  
35  
36  
37  
38  
39  
40  
41  
42  
43  
44  
45  
46  
47  
48  
49  
50  
51  
52  
53  
54  
55  
56  
57  
58  
59  
60

For peer review only

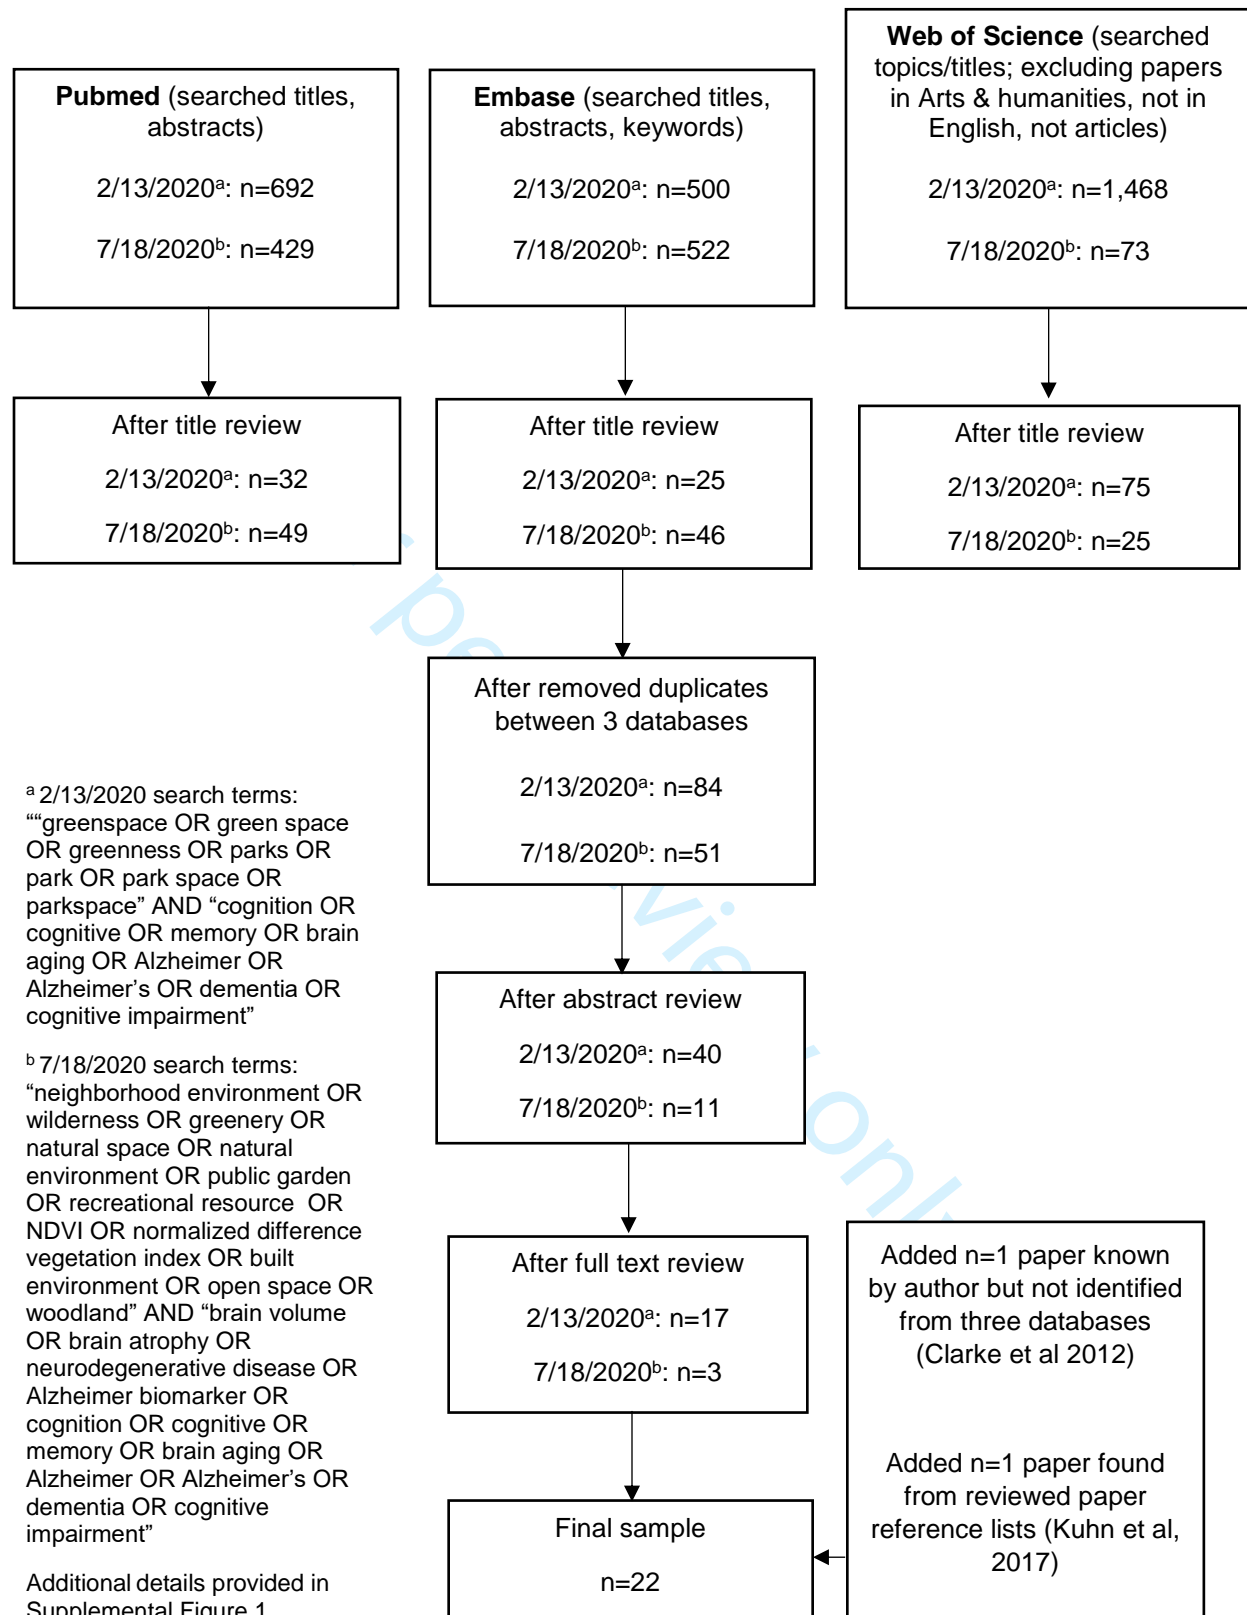

**Supplemental Figure 1.** Detailed diagram of literature search strategy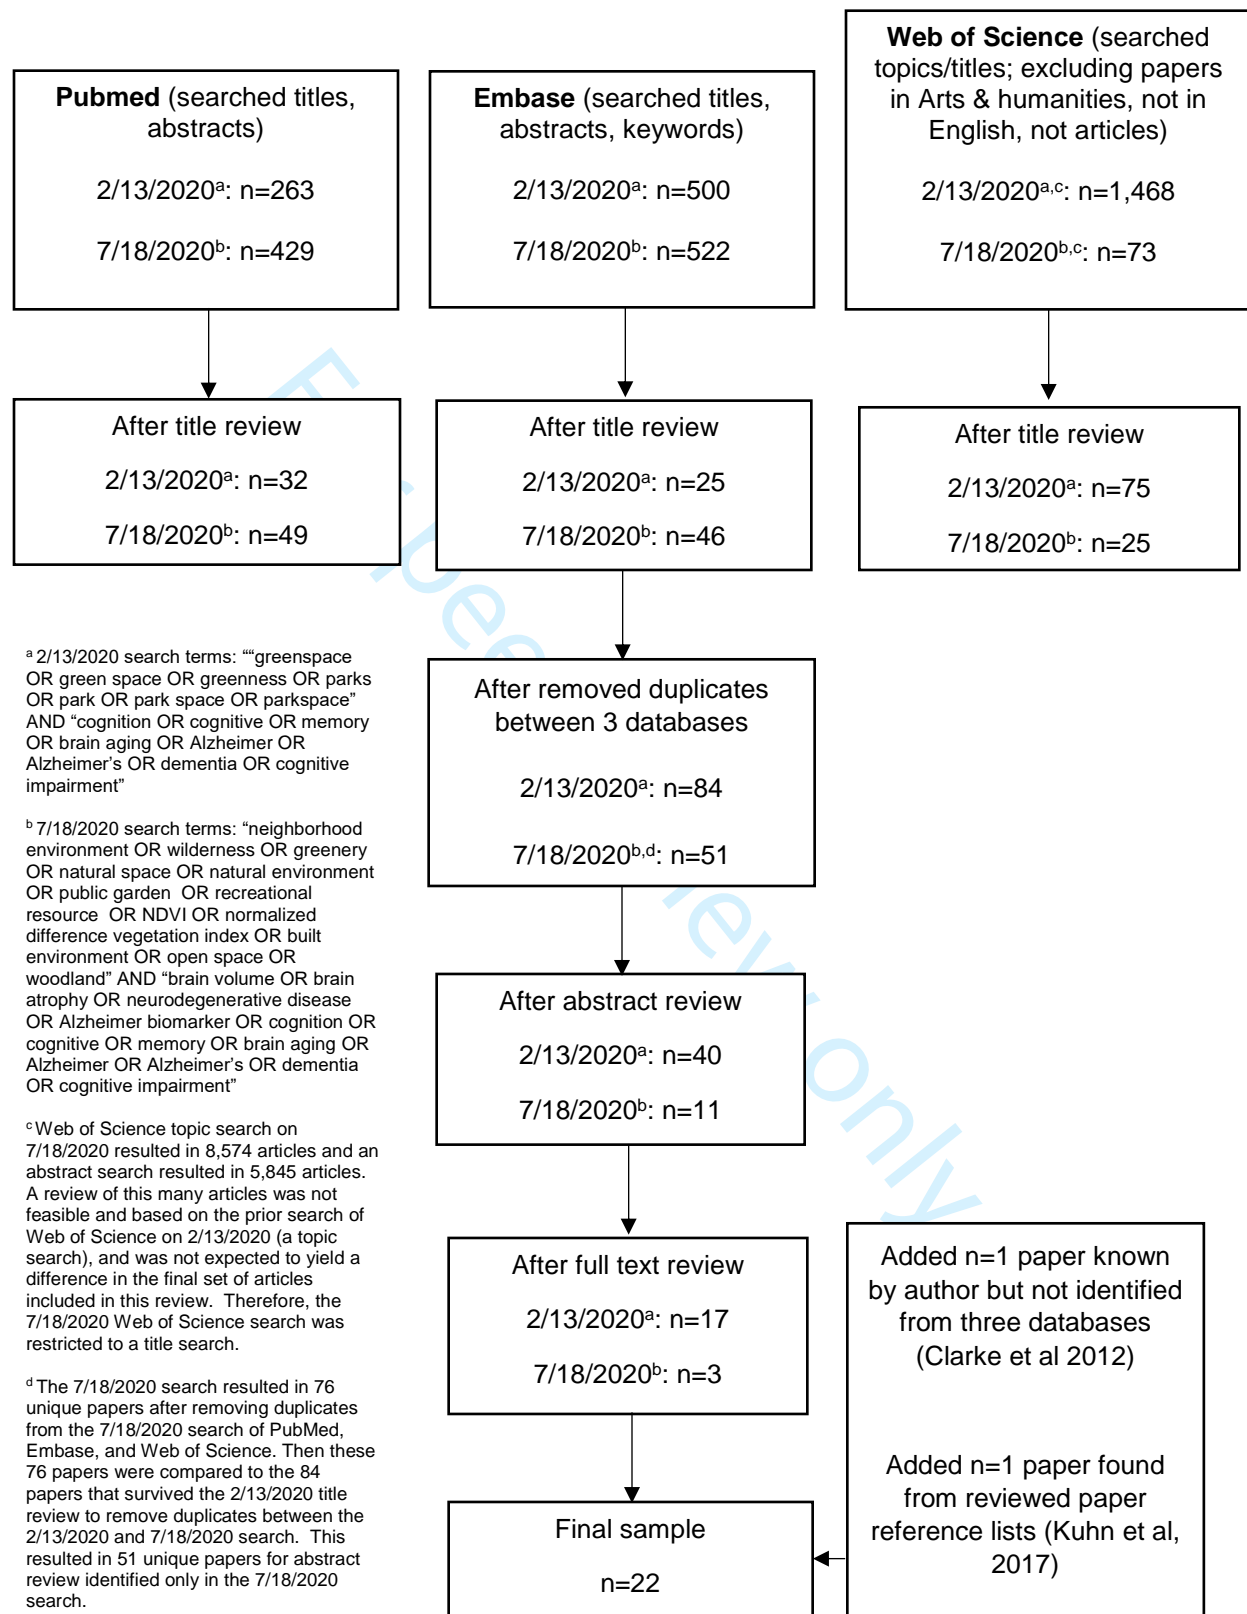



**Supplemental Text 1. List of 20 papers included in systematic review**

- Brown SC et al. (2018) Health Disparities in the Relationship of Neighborhood Greenness to Mental Health Outcomes in 249,405 U.S. Medicare Beneficiaries *Int J Environ Res Public Health* 15 doi:10.3390/ijerph15030430
- Cherrie MPC et al. (2018) Green space and cognitive ageing: A retrospective life course analysis in the Lothian Birth Cohort 1936 *Soc Sci Med* 196:56-65 doi:10.1016/j.socscimed.2017.10.038
- Cherrie MPC, Shortt NK, Ward Thompson C, Deary IJ, Pearce JR (2019) Association Between the Activity Space Exposure to Parks in Childhood and Adolescence and Cognitive Aging in Later Life *Int J Environ Res Public Health* 16 doi:10.3390/ijerph16040632
- Clarke PJ, Ailshire JA, House JS, Morenoff JD, King K, Melendez R, Langa KM (2012) Cognitive function in the community setting: the neighbourhood as a source of 'cognitive reserve'? *J Epidemiol Community Health* 66:730-736 doi:10.1136/jech.2010.128116
- Dadvand P et al. (2015) Green spaces and cognitive development in primary schoolchildren *Proc Natl Acad Sci U S A* 112:7937-7942 doi:10.1073/pnas.1503402112
- Dadvand P et al. (2018) The Association between Lifelong Greenspace Exposure and 3-Dimensional Brain Magnetic Resonance Imaging in Barcelona Schoolchildren *Environ Health Perspect* 126:027012 doi:10.1289/EHP1876
- Dadvand P et al. (2017) Lifelong Residential Exposure to Green Space and Attention: A Population-based Prospective Study *Environ Health Perspect* 125:097016 doi:10.1289/EHP694
- Dzhambov AM, Bahchevanov KM, Chompalov KA, Atanassova PA (2019) A feasibility study on the association between residential greenness and neurocognitive function in middle-aged Bulgarians *Arh Hig Rada Toksikol* 70:173-185 doi:10.2478/aiht-2019-70-3326
- de Keijzer C et al. (2018) Residential Surrounding Greenness and Cognitive Decline: A 10-Year Follow-up of the Whitehall II Cohort *Environ Health Perspect* 126:077003 doi:10.1289/EHP2875
- Flouri E, Papachristou E, Midouhas E (2019) The role of neighbourhood greenspace in children's spatial working memory *The British journal of educational psychology* 89:359-373 doi:10.1111/bjep.12243
- Hystad P PY, Noisel N, Boileau C (2019) Green space associations with mental health and cognitive function: Results from the Quebec CARTaGENE cohort *Environmental Epidemiology* 3:e040
- Kuhn S et al. (2017) In search of features that constitute an "enriched environment" in humans: Associations between geographical properties and brain structure *Scientific reports* 7 doi:ARTN 11920
- Liao J et al. (2019) Residential exposure to green space and early childhood neurodevelopment *Environment international* 128:70-76 doi:10.1016/j.envint.2019.03.070
- Reuben A et al. (2019) Residential neighborhood greenery and children's cognitive development *Social science & medicine* (1982) 230:271-279 doi:10.1016/j.socscimed.2019.04.029
- Wang D, Lau KK, Yu R, Wong SYS, Kwok TTY, Woo J (2017) Neighbouring green space and mortality in community-dwelling elderly Hong Kong Chinese: a cohort study *BMJ open* 7:e015794 doi:10.1136/bmjopen-2016-015794
- Ward JS, Duncan JS, Jarden A, Stewart T (2016) The impact of children's exposure to greenspace on physical activity, cognitive development, emotional wellbeing, and ability to appraise risk *Health Place* 40:44-50 doi:10.1016/j.healthplace.2016.04.015
- Wu YT, Prina AM, Jones A, Matthews FE, Brayne C, Collaboration MRCCF, Study A (2017) The Built Environment and Cognitive Disorders: Results From the Cognitive Function and Ageing Study II *Am J Prev Med* doi:10.1016/j.amepre.2016.11.020
- Wu YT et al. (2015) Community environment, cognitive impairment and dementia in later life: results from the Cognitive Function and Ageing Study *Age Ageing* 44:1005-1011 doi:10.1093/ageing/afv137
- Yu R, Wang D, Leung J, Lau K, Kwok T, Woo J (2018) Is Neighborhood Green Space Associated With Less Frailty? Evidence From the Mr. and Ms. Os (Hong Kong) Study *Journal of the American Medical Directors Association* 19:528-534 doi:10.1016/j.jamda.2017.12.015
- Yuchi W, Sbihi H, Davies H, Tamburic L, Brauer M (2020) Road proximity, air pollution, noise, green space and neurologic disease incidence: a population-based cohort study *Environmental health : a global access science source* 19:8 doi:10.1186/s12940-020-0565-4
- Zhu A, Yan L, Shu C, Zeng Y, Ji JS (2020) APOE epsilon4 Modifies Effect of Residential Greenness on Cognitive Function among Older Adults: A Longitudinal Analysis in China *Scientific reports* 10:82 doi:10.1038/s41598-019-57082-7
- Zijlema WL et al. (2017) The relationship between natural outdoor environments and cognitive functioning and its mediators *Environ Res* 155:268-275 doi:10.1016/j.envres.2017.02.017

Supplemental Table 1. Green space and brain health studies including children and adolescents (&lt;18 year olds)

| Citation <sup>a</sup> , sample size, location      | Sample source                   | Age, sex, race/ethnicity                                                    | Green space measure                                                                                                                                                 | Brain health measure                                                                                                                                                                          | Statistical Method (covariates)                                                                                                                                                                   | Associations (positive, inverse, null)                                                                                                                                                                                                                                                                                                                                                                                     |
|----------------------------------------------------|---------------------------------|-----------------------------------------------------------------------------|---------------------------------------------------------------------------------------------------------------------------------------------------------------------|-----------------------------------------------------------------------------------------------------------------------------------------------------------------------------------------------|---------------------------------------------------------------------------------------------------------------------------------------------------------------------------------------------------|----------------------------------------------------------------------------------------------------------------------------------------------------------------------------------------------------------------------------------------------------------------------------------------------------------------------------------------------------------------------------------------------------------------------------|
| Cherrie (2018)<br>n=281<br><br>Edinburgh, Scotland | Lothian Birth Cohort (P)        | 11-78 years<br><br>48% female<br><br>Race/ethnicity not specified           | Park space (L): % park space (Location: residential; Boundary: 500m, 1000m, 1500m buffer) Time period: childhood, adulthood, older adulthood                        | Cognition (L): Moray House Test No 12 (domain: intelligence) Time period: childhood, adulthood, older adulthood                                                                               | Multivariable linear regression (sex, father's occupation, number per room in childhood household, childhood smoking status, adulthood occupation, alcohol consumption, adulthood smoking status) | Positive: Greater neighborhood % park space in childhood and adulthood associated with less cognitive change from 70 to 76 years.<br>Null: Greater neighborhood % park space in childhood, adulthood, and older adulthood not associated with cognitive change from age 11 to 70. No association between % park space in late-life and cognitive change from 70 to 76 years.                                               |
| Dadvand (2015)<br>n=2,593<br><br>Barcelona, Spain  | 36 primary schools in Barcelona | 7-10 years (mean=8.5)<br><br>50% female<br><br>16% not Spanish, 84% Spanish | Greenness (CS): NDVI (Location: residential, school, school commute; Boundary: residential-250m buffer, school and commute route-50m buffer) Time period: childhood | Cognition (L): Computerized n-back test (domain: working memory); Computerized attentional network test (domain: attention, alerting, orienting, executive processing) Time period: childhood | Multivariable linear mixed effects regression (age, sex, maternal education, residential neighborhood SES)                                                                                        | Positive: Greater school greenness and total greenness (school, home, commute) associated with 12-month enhancement in working memory and attention. Greater commute route greenness associated with 12-month enhancement in working memory.<br>Null: No association between residential greenness and cognition, commute greenness and attention, or any greenness measure and alerting, orienting, executive processing. |

1  
2  
3  
4  
5  
6  
7  
8  
9  
10  
11  
12  
13  
14  
15  
16  
17  
18  
19  
20  
21  
22  
23  
24  
25  
26  
27  
28  
29  
30  
31  
32  
33  
34  
35  
36  
37  
38  
39  
40  
41  
42  
43  
44  
45  
46  
47

|                                                                          |                                                                                      |                                                               |                                                                                                                                                                             |                                                                                                                                                                                      |                                                                                                                                                                                                                           |                                                                                                                                                                                                                                                                             |
|--------------------------------------------------------------------------|--------------------------------------------------------------------------------------|---------------------------------------------------------------|-----------------------------------------------------------------------------------------------------------------------------------------------------------------------------|--------------------------------------------------------------------------------------------------------------------------------------------------------------------------------------|---------------------------------------------------------------------------------------------------------------------------------------------------------------------------------------------------------------------------|-----------------------------------------------------------------------------------------------------------------------------------------------------------------------------------------------------------------------------------------------------------------------------|
| Dadvand (2017)<br>n=888 at 4-5 year follow-up; n=987 at 7-year follow-up | Infancia y Medio Ambiente (INMA) cohort (P)                                          | 4-7 years<br>49% female<br>Race/ethnicity not specified       | Greenness (L): NDVI and Vegetation Continuous Fields (% woody vegetation >5 m high)<br>(Location: residential; Boundary: 100m, 300m, 500m buffer)<br>Time period: childhood | Cognition (L): Conners' Kiddie Continuous Performance Test (4-5 year olds) (domain: attention); Attentional Network Task (7 year olds) (domain: attention)<br>Time period: childhood | Multivariable linear mixed effects regression (age, sex, preterm birth, maternal cognitive performance, maternal smoking during pregnancy, exposure to environmental tobacco smoke, maternal education, neighborhood SES) | Positive: Greater neighborhood greenness (birth to 4-5 years old) associated with attention at 4-5 years and greater greenness (birth to 7 years old) associated with attention at 7 years old.<br>Null: % neighborhood woody vegetation >5m not associated with attention. |
| Dadvand (2018)<br>n=253<br>Barcelona, Spain                              | Brain Development and Air Pollution Ultrafine Particles in School Children (BREATHE) | Mean: 8.4 years<br>49% female<br>Race/ethnicity not specified | Greenness (L): NDVI (Location: residential; Boundary: 100m, 500m buffer)<br>Time period: childhood                                                                          | Magnetic Resonance Imaging (CS) of gray and white matter in regional clusters<br>Time period: childhood                                                                              | Adjusted voxel-wise regression using statistical parametric maps (maternal education, neighborhood SES- included one or the other in the analysis)                                                                        | Positive: Greater neighborhood greenness exposure since birth associated with left and right prefrontal cortex, left premotor cortex, and white matter.<br>Null: No associations between greenness and other brain regions.                                                 |
| Flouri (2019)<br>n=4,758<br>UK                                           | UK Millenium Cohort Study (MCS) (P)                                                  | Mean: 10.6 years<br>49% female<br>74% white<br>26% non-white  | Green space (CS): % green space (Location: residential; Boundary: ward)<br>Time period: childhood                                                                           | Cognition (CS): Cambridge Neuropsychological Test Automated Battery SWM Test (domain: spatial working memory)<br>Time period: childhood                                              | Multivariable, multilevel linear regression (age in months, gender, family socioeconomic status, ethnicity, sports participation, computer gaming, residential mobility since infancy, neighborhood deprivation)          | Positive: Greater % neighborhood green space associated with better spatial working memory.                                                                                                                                                                                 |

|    |               |               |                |                   |                           |                                |                          |
|----|---------------|---------------|----------------|-------------------|---------------------------|--------------------------------|--------------------------|
| 1  |               |               |                |                   |                           |                                |                          |
| 2  |               |               |                |                   |                           |                                |                          |
| 3  | Liao (2019)   | Women and     | Mean: 39       | Greenness (CS):   | Cognition (CS): Bayley    | Multivariable, multiple linear | Positive: Greater        |
| 4  | n=1,312       | Children      | weeks          | NDVI              | Scales of Infant          | regression (household          | neighborhood greenness   |
| 5  |               | Medical and   |                | (Location:        | Development – Mental      | income, maternal age,          | at birth associated with |
| 6  | Wuhan, China  | Healthcare    | 46% female     | residential;      | Development Index         | maternal education,            | better Mental            |
| 7  |               | Center of     |                | Boundary: 300m    | (Domain: perceptual       | maternal pre-pregnancy         | Development Index        |
| 8  |               | Wuhan         | Race/ethnicity | buffer)           | acuties, memory,          | BMI, maternal passive          | scores.                  |
| 9  |               |               | not specified  | Time period:      | learning and problem      | smoking during pregnancy,      |                          |
| 10 |               |               |                | childhood         | solving, abstract         | gestational age, birth         |                          |
| 11 |               |               |                |                   | thinking)                 | weight, residence areas)       |                          |
| 12 |               |               |                |                   | Time period: childhood    |                                |                          |
| 13 | Reuben (2019) | Environmental | Age 5, 12, and | Greenness (L):    | Cognition (L): Wechsler   | Multivariable analysis of      | Null: Neighborhood       |
| 14 | n=1,658       | Risk (E-Risk) | 18             | NDVI              | Preschool and Primary     | covariance model for           | greenness not associated |
| 15 |               | Longitudinal  |                | (Location:        | Scale of Intelligence-    | longitudinal model (sex,       | with fluid ability,      |
| 16 | UK            | Study (same   | 52% female     | residential;      | Revised, Wechsler         | polygenic score for            | crystallized ability,    |
| 17 |               | sex twin      |                | Boundary: 1-mile  | Intelligence Scale for    | educational attainment,        | executive function,      |
| 18 |               | study) (P)    | Race/ethnicity | buffer)           | Children-IV, Wechsler     | family socioeconomic           | attention, or working    |
| 19 |               |               | not specified  | Time period:      | Adult Intelligence Scale- | status, neighborhood           | memory measured any      |
| 20 |               |               |                | childhood         | IV (domain: crystalized   | socioeconomic status)          | age.                     |
| 21 |               |               |                |                   | and fluid cognitive       |                                |                          |
| 22 |               |               |                |                   | ability); Spatial Span    | Multivariable information      |                          |
| 23 |               |               |                |                   | test (domain: executive   | maximum likelihood (FIML)      |                          |
| 24 |               |               |                |                   | function); Spatial        | estimated regression,          |                          |
| 25 |               |               |                |                   | Working Memory test       | accounting for missing data    |                          |
| 26 |               |               |                |                   | (domain: working          | (same covariates as            |                          |
| 27 |               |               |                |                   | memory); Rapid Visual     | longitudinal models)           |                          |
| 28 | Ward (2016)   | Three         | 11-14 years    | Time spent in     | Cognition (CS): CNS       | Multivariable generalized      | Null: % time spent in    |
| 29 | n=72          | intermediate  | (mean=12.7)    | green space from  | Vital Signs (domain:      | linear mixed regression        | greenspace not           |
| 30 |               | schools       |                | GPS (CS) Time     | visual memory, verbal     | (sex, age, school)             | associated with any      |
| 31 | Auckland, New |               | 59% female     | period: childhood | memory, processing        |                                | cognitive domain.        |
| 32 | Zealand       |               |                |                   | speed, psychomotor        |                                |                          |
| 33 |               |               | Race/ethnicity |                   | speed, reaction time,     |                                |                          |
| 34 |               |               | not specified  |                   | cognitive flexibility,    |                                |                          |
| 35 |               |               |                |                   | executive function)       |                                |                          |
| 36 |               |               |                |                   | Time period: childhood    |                                |                          |

Abbreviations: CS = cross-sectional; L= longitudinal; UK = United Kingdom; P = population-based/random sampling

<sup>a</sup> Full list of papers found in Supplemental Text 1

Supplemental Table 2. Green space and brain health studies including adults aged 18-64 years

| Citation <sup>a</sup> , sample size, location | Sample source                            | Age, sex, race/ethnicity                                                               | Green space measure                                                                                                                                   | Brain health measure                                                                                                                                                                                                                                                               | Statistical Method (covariates)                                                                                                                                                                           | Associations (positive, inverse, null)                                                                                                                                                      |
|-----------------------------------------------|------------------------------------------|----------------------------------------------------------------------------------------|-------------------------------------------------------------------------------------------------------------------------------------------------------|------------------------------------------------------------------------------------------------------------------------------------------------------------------------------------------------------------------------------------------------------------------------------------|-----------------------------------------------------------------------------------------------------------------------------------------------------------------------------------------------------------|---------------------------------------------------------------------------------------------------------------------------------------------------------------------------------------------|
| Cherrie (2018)                                | See Table 1                              |                                                                                        |                                                                                                                                                       |                                                                                                                                                                                                                                                                                    |                                                                                                                                                                                                           |                                                                                                                                                                                             |
| Clarke (2012)<br>n = 949<br>Chicago, US       | Chicago Community Adult Health Study (P) | ≥50 years<br>56% female<br>37% black, 18% Hispanic, 43% white, 3% other race/ethnicity | Park space (CS):<br>Park area in square miles (Location: residential; Boundary: US Census tract)<br>Time period: adulthood, older adulthood           | Cognition (CS):<br>Modified Telephone Instrument for Cognitive Status (domain: global cognition)<br>Time period: adulthood, older adulthood                                                                                                                                        | Multivariable, multilevel linear regression (age, gender, marital status, race/ethnicity, employment status, socioeconomic position, index of comorbid conditions, physical activity, social interaction) | Null: neighborhood park area not associated with global cognition.                                                                                                                          |
| De Keijzer (2018)<br>n=6,506<br>UK            | The Whitehall II study (P)               | 45-68 years<br>29% female<br>91% white<br>9% non-white                                 | Greenness (L): NDVI and EVI (Location: residential; Boundary: 500m, 1000m buffer around postcode centroid)<br>Time period: adulthood, older adulthood | Cognition (L): Alice Heim 4 test of intelligence (domain: reasoning); S words, Animal names (domain: phonemic and semantic verbal fluency); Free recall test (domain: short-term memory); Global cognition z-score derived from 4 tests<br>Time period: adulthood, older adulthood | Multivariable linear mixed effects regression (gender, ethnicity, education, time varying: age, marital status, employment grade, neighborhood SSES, diet, alcohol consumption, smoking status)           | Positive: Greater neighborhood greenness associated with slower decline in global cognition, reasoning, and fluency.<br>Null: Neighborhood greenness not associated with short-term memory. |

|    |          |             |                |                         |                          |                                          |                         |
|----|----------|-------------|----------------|-------------------------|--------------------------|------------------------------------------|-------------------------|
| 1  |          |             |                |                         |                          |                                          |                         |
| 2  |          |             |                |                         |                          |                                          |                         |
| 3  | Dzhambov | Convenience | 45-55 years    | Greenness (CS):         | Cognition (CS):          | Multivariable linear                     | Positive: Greater       |
| 4  | (2019)   | sample of   | (mean: 50)     | NDVI                    | Consortium to            | regression (age, sex,                    | greenness associated    |
| 5  | n=112    | volunteers  | 59% female     | (Location: residential; | Establish a Registry for | education, city,                         | with better global      |
| 6  | Plovdiv, |             | Race/ethnicity | Boundary: 100m,         | Alzheimer's Disease      | neighborhood population,                 | cognition and verbal    |
| 7  | Bulgaria |             | not specified  | 100m, 750m, 1000m       | Neuropsychological       | smoking, alcohol                         | fluency. Greater        |
| 8  |          |             |                | buffer around           | Battery (CERAD-NB),      | consumption, waist                       | greenness associated    |
| 9  |          |             |                | residence)              | including Verbal         | circumference, blood                     | with greater cortical   |
| 10 |          |             |                | Time period:            | Fluency test (domain:    | pressure, cholesterol,                   | thickness in both       |
| 11 |          |             |                | adulthood               | fluency), modified       | blood glucose, nitrogen                  | hemispheres in the      |
| 12 |          |             |                |                         | Boston Naming Test       | dioxide [NO <sub>2</sub> ], road traffic | prefrontal cortex,      |
| 13 |          |             |                |                         | (domain: naming),        | noise)                                   | bilateral fusiform      |
| 14 |          |             |                |                         | Word List Memory         |                                          | gyrus, left precuneus   |
| 15 |          |             |                |                         | (domain: memory),        |                                          | and insula, and right   |
| 16 |          |             |                |                         | Word List Recall         |                                          | cuneus.                 |
| 17 |          |             |                |                         | (domain: memory),        |                                          | Null: Greater           |
| 18 |          |             |                |                         | Word List Recognition;   |                                          | greenness was not       |
| 19 |          |             |                |                         | Montreal Cognitive       |                                          | associated with         |
| 20 |          |             |                |                         | Assessment (MoCA)        |                                          | scores on the subtests  |
| 21 |          |             |                |                         | (domain: global          |                                          | of the CERAD-NB         |
| 22 |          |             |                |                         | cognition);              |                                          | except the Verbal       |
| 23 |          |             |                |                         | Magnetic Resonance       |                                          | Fluency Test. Greater   |
| 24 |          |             |                |                         | Imaging (CS) of          |                                          | greenness was not       |
| 25 |          |             |                |                         | cortical thickness of    |                                          | associated with         |
| 26 |          |             |                |                         | multiple brain regions   |                                          | cortical thickness in   |
| 27 |          |             |                |                         | of interest              |                                          | regions of the brain    |
| 28 |          |             |                |                         | Time period: adulthood   |                                          | other than those listed |
| 29 |          |             |                |                         |                          |                                          | above.                  |
| 30 | Hystad   | CARTaGENE   | 40-69 years    | Greenness (L): NDVI     | Cognition (CS):          | Multivariable linear                     | Inverse: Five-year      |
| 31 | (2019)   | Cohort (P)  | (mean: 55)     | (Location: residential; | Reaction time test       | regression (age, sex,                    | change in greenness     |
| 32 | n=6,658  |             | 55% female     | Boundary: 100m,         | (domain: reaction        | household income, race,                  | associated with worse   |
| 33 | Quebec,  |             | 81% white      | 300m, 500m, 1000m       | time); Paired            | marital status, city,                    | reasoning.              |
| 34 | Canada   |             | 19% non-white  | buffer around postal    | associates learning      | population density)                      | Null: Five-year         |
| 35 |          |             |                | codes)                  | (domain: working         |                                          | average neighborhood    |
| 36 |          |             |                | Time period:            | memory); verbal and      |                                          | greenness not           |
| 37 |          |             |                | adulthood               | numeric reasoning        |                                          | associated with         |
| 38 |          |             |                |                         | (domain: executive       |                                          | reaction time,          |
| 39 |          |             |                |                         | function)                |                                          | reasoning, or working   |
| 40 |          |             |                |                         | Time period: adulthood   |                                          | memory. Five-year       |
| 41 |          |             |                |                         |                          |                                          | change in greenness     |
| 42 |          |             |                |                         |                          |                                          | not associated with     |
| 43 |          |             |                |                         |                          |                                          | reaction time or        |
| 44 |          |             |                |                         |                          |                                          | working memory.         |
| 45 |          |             |                |                         |                          |                                          |                         |
| 46 |          |             |                |                         |                          |                                          |                         |
| 47 |          |             |                |                         |                          |                                          |                         |

1  
2  
3  
4  
5  
6  
7  
8  
9  
10  
11  
12  
13  
14  
15  
16  
17  
18  
19  
20  
21  
22  
23  
24  
25  
26  
27  
28  
29  
30  
31  
32  
33  
34  
35  
36  
37  
38  
39  
40  
41  
42  
43  
44  
45  
46  
47

|                                                                                    |                                                                                                                                  |                                                                             |                                                                                                                                                                                                                                                                                                                                                                                  |                                                                                                                                                                                                 |                                                                                                                                                                                                                                                                                                                                                                               |                                                                                                                                                                                                                                                                                                                                            |
|------------------------------------------------------------------------------------|----------------------------------------------------------------------------------------------------------------------------------|-----------------------------------------------------------------------------|----------------------------------------------------------------------------------------------------------------------------------------------------------------------------------------------------------------------------------------------------------------------------------------------------------------------------------------------------------------------------------|-------------------------------------------------------------------------------------------------------------------------------------------------------------------------------------------------|-------------------------------------------------------------------------------------------------------------------------------------------------------------------------------------------------------------------------------------------------------------------------------------------------------------------------------------------------------------------------------|--------------------------------------------------------------------------------------------------------------------------------------------------------------------------------------------------------------------------------------------------------------------------------------------------------------------------------------------|
| Yuchi (2020) n=678,000 Vancouver, British Columbia, Canada                         | Medical Services Plan Physician Visit and Hospital Discharge data (P)                                                            | 45-84 years Sex not provided for entire sample Race/ethnicity not specified | Greenness (L): NDVI (Location: residential; Boundary: 100m buffer) Time period: adulthood, older adulthood                                                                                                                                                                                                                                                                       | Diagnosis (L): Alzheimer’s disease, non-Alzheimer’s disease; and Parkinson’s disease (source: hospital records, physician visits, prescription history) Time period: adulthood, older adulthood | Multivariable Cox proportion hazards model for non-Alzheimer’s disease and Parkinson’s disease (age, sex, comorbidities, neighborhood household income, neighborhood education, neighborhood ethnicity); Multivariable conditional logistic regression for Alzheimer’s disease (comorbidities, neighborhood household income, neighborhood education, neighborhood ethnicity) | Positive: Greater neighborhood greenness associated with lower hazard ratio for non-Alzheimer’s disease and Parkinson’s disease. Inverse: Greater neighborhood greenness associated with increased odds of Alzheimer’s disease.                                                                                                            |
| Zijlema (2017) n=1,628 Barcelona, Spain Doetinchem, Netherlands Stoke-on-Trent, UK | Positive Health Effects of the Natural Outdoor Environment in Typical Populations in Different Regions in Europe (PHENOTYPE) (P) | Mean: 48 years 54% female Race/ethnicity not specified                      | Greenness (CS): NDVI (Location: residential; Boundary: 100m, 300m, 500m buffer); Other green space measures (CS): Residential distance to natural outdoor environment, self-reported amount of natural outdoor environment; self-reported visits to natural outdoor environment; self-reported time visiting natural outdoor environment Time period: adulthood, later-adulthood | Cognition (CS): Color Trails Test completion time and errors (domain: visual attention/effortful executive processing) Time period: adulthood, older adulthood                                  | Multivariable, multilevel linear and logistic regression (age, sex, education, neighborhood socioeconomic status, time spent away from home, Color Trails Test quality)                                                                                                                                                                                                       | Positive: Greater residential distance to natural outdoor environments associated with greater cognitive test completion time. Null: Residential greenness, percentage residential natural environment, self-reported natural environment visits, and self-reported time spent visiting natural environment not associated with cognition. |

---

Abbreviations: CS = cross-sectional; L = Longitudinal; P = population-based/random sampling; EVI = Enhanced Vegetation Index; UK = United Kingdom  
<sup>a</sup> Full list of papers found in Supplemental Text 1

Supplemental Table 3. Green space and brain health studies including older adults aged ≥65 years

| Citation <sup>a</sup> , sample size, location | Sample source                                                 | Age, sex, race/ethnicity                                                 | Green space measure                                                                                                                                            | Brain health measure                                                                                                                                                                                                                                           | Statistical Method (covariates)                                                               | Associations (positive, inverse, null)                                                                                                                                                                                                           |
|-----------------------------------------------|---------------------------------------------------------------|--------------------------------------------------------------------------|----------------------------------------------------------------------------------------------------------------------------------------------------------------|----------------------------------------------------------------------------------------------------------------------------------------------------------------------------------------------------------------------------------------------------------------|-----------------------------------------------------------------------------------------------|--------------------------------------------------------------------------------------------------------------------------------------------------------------------------------------------------------------------------------------------------|
| Brown (2018)<br>n=249,405<br>Florida, US      | US Medicare Beneficiaries from Miami-Dade County, Florida (P) | Age: 65-111 years (mean: 76)<br>58% female<br>77% non-white<br>23% white | Greenness (CS): NDVI (Location: residential; Boundary: US Census block)<br>Time period: older adulthood                                                        | Diagnosis (CS): Alzheimer's disease (source: US Centers for Medicare and Medicaid Services)<br>Time period: older adulthood                                                                                                                                    | Multivariable, multilevel logistic regression (age, sex, race/ethnicity, neighborhood income) | Positive: Greater neighborhood greenness associated with lower odds of Alzheimer's disease.                                                                                                                                                      |
| Cherrie (2018)                                | See Table 1                                                   |                                                                          |                                                                                                                                                                |                                                                                                                                                                                                                                                                |                                                                                               |                                                                                                                                                                                                                                                  |
| Cherrie (2019)<br>n=281<br>Edinburgh, UK      | Lothian Birth Cohort (P)                                      | Age: 70-76 years<br>Female: 48%<br>Race/ethnicity not specified          | Park space (L): % park space (Location: residential, school, school route; Boundary: 1000m buffer around home, school, school route)<br>Time period: childhood | Cognition (L): Moray House Test No 12 (domain: intelligence)<br>Time period: older adulthood (sex, father's occupation, number per room in childhood household, childhood smoking status, adulthood occupation, alcohol consumption, adulthood smoking status) | Multivariable, multilevel linear regression                                                   | Positive: % park space at ages 11-18 near home, school, and school route associated with less cognitive change from 70 to 76 years.<br>Null: No association between % park space measures at ages 4-11 and cognitive change from 70 to 76 years. |
| Clarke (2012)                                 | See Table 2                                                   |                                                                          |                                                                                                                                                                |                                                                                                                                                                                                                                                                |                                                                                               |                                                                                                                                                                                                                                                  |
| De Keijzer (2018)                             | See Table 2                                                   |                                                                          |                                                                                                                                                                |                                                                                                                                                                                                                                                                |                                                                                               |                                                                                                                                                                                                                                                  |
| Kuhn (2017)<br>n=341<br>Berlin, Germany       | Berlin Aging Study II                                         | 61-82 years (mean: 70)<br>38% female<br>Race/ethnicity not specified     | Green space (CS): Amount of forest and urban green (Location: residential; Boundary: 1km surrounding residence)<br>Time period: older adulthood                | Magnetic Resonance Imaging (CS) of integrity of amygdala, pregenual anterior cingulate cortex (pACC), and dorsolateral prefrontal cortex (DLPFC) determined from                                                                                               | Structural Equation Modeling (SEM) (age, sex, years of education)                             | Positive: Greater amount of forest in neighborhood associated with greater amygdala integrity.<br>Null: No association between amount of forest and pACC or DLPFC integrity, or between amount                                                   |



1  
2  
3  
4  
5  
6  
7  
8  
9  
10  
11  
12  
13  
14  
15  
16  
17  
18  
19  
20  
21  
22  
23  
24  
25  
26  
27  
28  
29  
30  
31  
32  
33  
34  
35  
36  
37  
38  
39  
40  
41  
42  
43  
44  
45  
46  
47

indicators of brain structural integrity (grey matter volume, magnetization transfer ratio, mean diffusivity)  
Time period: Older adulthood

of urban green and any brain measure.

Wang (2017)  
n=3,544  
Hong Kong, China

Community based-cohort

≥65 years (median: 72)  
50% female  
Race/ethnicity not specified

Greenness (CS): NDVI (Location: residential; boundary: 300m buffer)  
Time period: older adulthood

Cognition (CS): Mini Mental State Exam (domain: global cognition)  
Time period: older adulthood

Spearman's correlation coefficients (unadjusted analysis)

Null: no correlation between neighborhood greenness and global cognition.

Wu (2015)  
n=2,424  
UK

Medical Research Council Cognitive Function and Ageing Study (P)

Age ≥74 years (Mean: 82)  
60.7% female  
Race/ethnicity not specified

Green space (CS): % green space/private gardens (Location: residential; Boundary: Lower – Layer Super Output Area for postcode)  
Time period: older adulthood

Cognitive status (CS): Cognitive impairment (source: Mini Mental State Exam ≤25)  
Diagnosis (CS): dementia (source: Geriatric Mental Status and Automatic Geriatric Examination for Computer Assisting Taxonomy)  
Time period: older adulthood

Multivariable, multilevel logistic regression (age, gender, education, social class, number chronic illnesses, area deprivation)

Inverse: Individuals living with highest quartile of neighborhood green space (versus lowest) had increased odds of cognitive impairment and dementia.

Wu (2017)  
n=7,505  
UK

Medical Research Council Cognitive Function and Ageing Study II (P)

Median: 74 years  
54% female  
Race/ethnicity not specified

Green space (CS): % green space/private gardens (Location: residential; Boundary: Lower – Layer Super Output Area for postcode)  
Time period: older adulthood

Cognitive status (CS): Cognitive impairment (source: Mini Mental State Exam ≤25)  
Diagnosis (CS): dementia (source: Geriatric Mental Status and Automatic Geriatric Examination for Computer Assisting Taxonomy)  
Time period: older adulthood

Multivariable, multilevel logistic regression (age, gender, education, number chronic illnesses, area deprivation)

Inverse: Individuals living with highest quintile of neighborhood green space/private gardens (versus lowest) had increased odds of cognitive impairment.  
Null: No associations between neighborhood green space and odds of dementia.

|    |              |                |                |                         |                       |                         |                                 |
|----|--------------|----------------|----------------|-------------------------|-----------------------|-------------------------|---------------------------------|
| 1  |              |                |                |                         |                       |                         |                                 |
| 2  |              |                |                |                         |                       |                         |                                 |
| 3  | Yu (2018)    | Mr. and Ms. Os | Mean: 72 years | Greenness (CS): NDVI    | Cognition (CS): Mini  | Multivariable           | Null: Greater neighborhood      |
| 4  | n=3,240      | (Hong Kong)    | 49% female     | (Location: residential; | Mental State Exam     | regression path         | greenness not directly          |
| 5  | Hong Kong,   | study          | Race/ethnicity | Boundary: 300m buffer)  | (domain: global       | analysis (age, sex,     | associated with cognition.      |
| 6  | China        |                | not specified  | Time period: older      | cognition)            | marital status,         |                                 |
| 7  |              |                |                | adulthood               | Time period: older    | socioeconomic           |                                 |
| 8  |              |                |                |                         | adulthood             | status, alcohol intake, |                                 |
| 9  |              |                |                |                         |                       | diet quality, baseline  |                                 |
| 10 | Yuchi (2020) | See Table 2    |                |                         |                       | frailty status)         |                                 |
| 11 |              |                |                |                         |                       |                         |                                 |
| 12 | Zhu (2020)   | Chinese        | Mean: 80 years | Greenness (L): NDVI     | Cognitive status (L): | Multivariable logistic  | Positive: Individuals living in |
| 13 | n=6,994      | Longitudinal   | 51% female     | (Longitudinal: no;      | Cognitive impairment  | regression using        | highest quartile of             |
| 14 | China        | Healthy        | Race/ethnicity | Location: residential;  | (source: Mini Mental  | generalized             | neighborhood greenness          |
| 15 |              | Longevity      | not specified  | Boundary: 500m buffer)  | State Exam <24)       | estimating equations    | had lower odds of cognitive     |
| 16 |              | Survey         |                | Time period: older      | Time period: older    | (age, gender, marital   | impairment.                     |
| 17 |              | (CLHLS) (P)    |                | adulthood               | adulthood             | status, urban/rural     |                                 |
| 18 |              |                |                |                         |                       | residence, education,   |                                 |
| 19 |              |                |                |                         |                       | occupation, financial   |                                 |
| 20 |              |                |                |                         |                       | support, social and     |                                 |
| 21 |              |                |                |                         |                       | leisure activity,       |                                 |
| 22 |              |                |                |                         |                       | smoking status,         |                                 |
| 23 | Zijlema      | See Table 2    |                |                         |                       | alcohol consumption,    |                                 |
| 24 | (2017)       |                |                |                         |                       | and physical activity)  |                                 |

Abbreviations: CS = cross-sectional; L = longitudinal; P = population-based/random sampling; UK = United Kingdom

<sup>a</sup> Full list of papers found in Supplemental Text 1

1  
2  
3  
4  
5  
6  
7  
8  
9  
10  
11  
12  
13  
14  
15  
16  
17  
18  
19  
20  
21  
22  
23  
24  
25  
26  
27  
28  
29  
30  
31  
32  
33  
34  
35  
36  
37  
38  
39  
40  
41  
42  
43  
44  
45  
46  
47

Supplemental Table 4. Studies examining effect modification and mediation

| Citation       | Effect modifier examined                                                         | Effect modification findings                                                                                                                                                                                                                                                                                                                     | Mediator examined                                                     | Mediation findings                                                                                                                                                                                                           |
|----------------|----------------------------------------------------------------------------------|--------------------------------------------------------------------------------------------------------------------------------------------------------------------------------------------------------------------------------------------------------------------------------------------------------------------------------------------------|-----------------------------------------------------------------------|------------------------------------------------------------------------------------------------------------------------------------------------------------------------------------------------------------------------------|
| Brown (2018)   | Neighborhood income level                                                        | No effect modification                                                                                                                                                                                                                                                                                                                           | None                                                                  | N/A                                                                                                                                                                                                                          |
| Cherrie (2018) | Sex<br>APOE ε4 allele<br>Adult occupational class<br>Adulthood park availability | Association between greater childhood park availability and slower cognitive decline from 70-76 years strongest in those with greater adulthood park availability, and these associations were stronger for women, APOE ε4 non-carriers, and individuals who had skilled/unskilled jobs (versus professional).                                   | None                                                                  | N/A                                                                                                                                                                                                                          |
| Cherrie (2019) | Sex<br>Traffic Accident Density                                                  | No effect modification by sex. Association between childhood park activity space was not associated with cognitive aging differentially by traffic accident density; however, association between greater adolescent park activity space and better cognitive aging was restricted to those with lower traffic accident density (versus higher). | None                                                                  | N/A                                                                                                                                                                                                                          |
| Clarke (2012)  | None                                                                             | N/A                                                                                                                                                                                                                                                                                                                                              | Physical activity<br>Social interaction                               | No mediation                                                                                                                                                                                                                 |
| Dadvand (2015) | Maternal education<br>Neighborhood SES                                           | Not effect modification                                                                                                                                                                                                                                                                                                                          | Traffic Related Air Pollution (elemental carbon, residential indoors) | Elemental carbon explained 20-65% of associations between school greenness and cognitive changes and resulted in changed (no longer significant) associations between school greenness and working memory and attentiveness. |
| Dadvand (2017) | Cohort location (Sabadell versus Valencia)                                       | No effect modification                                                                                                                                                                                                                                                                                                                           | None                                                                  | N/A                                                                                                                                                                                                                          |

|    |                      |                                                                                                             |                                                                                                                                                                                                                                         |                                                                                                                    |                                                                                                                        |
|----|----------------------|-------------------------------------------------------------------------------------------------------------|-----------------------------------------------------------------------------------------------------------------------------------------------------------------------------------------------------------------------------------------|--------------------------------------------------------------------------------------------------------------------|------------------------------------------------------------------------------------------------------------------------|
| 1  |                      |                                                                                                             |                                                                                                                                                                                                                                         |                                                                                                                    |                                                                                                                        |
| 2  |                      |                                                                                                             |                                                                                                                                                                                                                                         |                                                                                                                    |                                                                                                                        |
| 3  | De Keijzer<br>(2018) | Sex<br>Education<br>Area level deprivation                                                                  | Association between greater greenness and slower decline in global cognition found for women but not men, stronger in those with higher education (versus lower), and stronger among those with higher area deprivation (versus lower). | Physical activity<br>Air pollution<br>Social support                                                               | No mediation                                                                                                           |
| 4  |                      |                                                                                                             |                                                                                                                                                                                                                                         |                                                                                                                    |                                                                                                                        |
| 5  |                      |                                                                                                             |                                                                                                                                                                                                                                         |                                                                                                                    |                                                                                                                        |
| 6  |                      |                                                                                                             |                                                                                                                                                                                                                                         |                                                                                                                    |                                                                                                                        |
| 7  |                      |                                                                                                             |                                                                                                                                                                                                                                         |                                                                                                                    |                                                                                                                        |
| 8  |                      |                                                                                                             |                                                                                                                                                                                                                                         |                                                                                                                    |                                                                                                                        |
| 9  | Dzhambov<br>(2019)   | None                                                                                                        | N/A                                                                                                                                                                                                                                     | Waist circumference<br>Systolic blood pressure<br>Total cholesterol<br>Glucose<br>Air pollution (NO <sub>2</sub> ) | Lower waist circumference mediated association between greater greenness and higher CERAD-NB score (global cognition). |
| 10 |                      |                                                                                                             |                                                                                                                                                                                                                                         |                                                                                                                    |                                                                                                                        |
| 11 |                      |                                                                                                             |                                                                                                                                                                                                                                         |                                                                                                                    |                                                                                                                        |
| 12 |                      |                                                                                                             |                                                                                                                                                                                                                                         |                                                                                                                    |                                                                                                                        |
| 13 |                      |                                                                                                             |                                                                                                                                                                                                                                         |                                                                                                                    |                                                                                                                        |
| 14 | Flouri (2019)        | Neighborhood deprivation<br>Residential stability                                                           | No effect modification                                                                                                                                                                                                                  | None                                                                                                               | N/A                                                                                                                    |
| 15 |                      |                                                                                                             |                                                                                                                                                                                                                                         |                                                                                                                    |                                                                                                                        |
| 16 |                      |                                                                                                             |                                                                                                                                                                                                                                         |                                                                                                                    |                                                                                                                        |
| 17 | Hystad<br>(2019)     | Education<br>Sex<br>Age<br>Household income<br>Race<br>Marital status<br>Years in current residence<br>City | Adjusted models were stratified but no statistical tests for differences between strata (i.e., no interaction terms used). Associations appeared to vary by sex, age, and education.                                                    | None                                                                                                               | N/A                                                                                                                    |
| 18 |                      |                                                                                                             |                                                                                                                                                                                                                                         |                                                                                                                    |                                                                                                                        |
| 19 |                      |                                                                                                             |                                                                                                                                                                                                                                         |                                                                                                                    |                                                                                                                        |
| 20 |                      |                                                                                                             |                                                                                                                                                                                                                                         |                                                                                                                    |                                                                                                                        |
| 21 |                      |                                                                                                             |                                                                                                                                                                                                                                         |                                                                                                                    |                                                                                                                        |
| 22 |                      |                                                                                                             |                                                                                                                                                                                                                                         |                                                                                                                    |                                                                                                                        |
| 23 |                      |                                                                                                             |                                                                                                                                                                                                                                         |                                                                                                                    |                                                                                                                        |
| 24 |                      |                                                                                                             |                                                                                                                                                                                                                                         |                                                                                                                    |                                                                                                                        |
| 25 | Liao<br>(2019)       | Household income<br>Pre-pregnancy body mass index<br>Infant sex                                             | Greater greenness associated with better cognition among children of mothers with pre-pregnancy BMI < 24 kg/m <sup>2</sup> .                                                                                                            | Traffic related air pollution (PM <sub>2.5</sub> )<br>Physical outdoor activities                                  | No mediation                                                                                                           |
| 26 |                      |                                                                                                             |                                                                                                                                                                                                                                         |                                                                                                                    |                                                                                                                        |
| 27 |                      |                                                                                                             |                                                                                                                                                                                                                                         |                                                                                                                    |                                                                                                                        |
| 28 |                      |                                                                                                             |                                                                                                                                                                                                                                         |                                                                                                                    |                                                                                                                        |
| 29 |                      |                                                                                                             |                                                                                                                                                                                                                                         |                                                                                                                    |                                                                                                                        |
| 30 | Wu<br>(2017)         | Urbanicity                                                                                                  | Among those living in conurbation areas with higher % green space, lower odds of cognitive impairment. Among those living in rural areas, those with higher % green space associated with greater odds of cognitive impairment.         | None                                                                                                               | N/A                                                                                                                    |
| 31 |                      |                                                                                                             |                                                                                                                                                                                                                                         |                                                                                                                    |                                                                                                                        |
| 32 |                      |                                                                                                             |                                                                                                                                                                                                                                         |                                                                                                                    |                                                                                                                        |
| 33 |                      |                                                                                                             |                                                                                                                                                                                                                                         |                                                                                                                    |                                                                                                                        |
| 34 |                      |                                                                                                             |                                                                                                                                                                                                                                         |                                                                                                                    |                                                                                                                        |
| 35 |                      |                                                                                                             |                                                                                                                                                                                                                                         |                                                                                                                    |                                                                                                                        |
| 36 |                      |                                                                                                             |                                                                                                                                                                                                                                         |                                                                                                                    |                                                                                                                        |
| 37 | Yu<br>(2018)         | None                                                                                                        | N/A                                                                                                                                                                                                                                     | Physical activity<br>Depression                                                                                    | Physical activity mediated association between greater greenness and global cognition.                                 |
| 38 |                      |                                                                                                             |                                                                                                                                                                                                                                         |                                                                                                                    |                                                                                                                        |
| 39 |                      |                                                                                                             |                                                                                                                                                                                                                                         |                                                                                                                    |                                                                                                                        |
| 40 |                      |                                                                                                             |                                                                                                                                                                                                                                         |                                                                                                                    |                                                                                                                        |
| 41 |                      |                                                                                                             |                                                                                                                                                                                                                                         |                                                                                                                    |                                                                                                                        |
| 42 |                      |                                                                                                             |                                                                                                                                                                                                                                         |                                                                                                                    |                                                                                                                        |
| 43 |                      |                                                                                                             |                                                                                                                                                                                                                                         |                                                                                                                    |                                                                                                                        |
| 44 |                      |                                                                                                             |                                                                                                                                                                                                                                         |                                                                                                                    |                                                                                                                        |
| 45 |                      |                                                                                                             |                                                                                                                                                                                                                                         |                                                                                                                    |                                                                                                                        |
| 46 |                      |                                                                                                             |                                                                                                                                                                                                                                         |                                                                                                                    |                                                                                                                        |
| 47 |                      |                                                                                                             |                                                                                                                                                                                                                                         |                                                                                                                    |                                                                                                                        |

1  
2  
3  
4  
5  
6  
7  
8  
9  
10  
11  
12  
13  
14  
15  
16  
17  
18  
19  
20  
21  
22  
23  
24  
25  
26  
27  
28  
29  
30  
31  
32  
33  
34  
35  
36  
37  
38  
39  
40  
41  
42  
43  
44  
45  
46  
47

|                |                                                                                         |                                                                                                                                                                                                                                                                |                                                                                                                                                                          |              |
|----------------|-----------------------------------------------------------------------------------------|----------------------------------------------------------------------------------------------------------------------------------------------------------------------------------------------------------------------------------------------------------------|--------------------------------------------------------------------------------------------------------------------------------------------------------------------------|--------------|
| Zhu (2020)     | Age (65-79 years; 80+ years)<br>APOE genotype ( $\epsilon$ 4 carriers vs. non-carriers) | Greater greenspace associated with lower odds of cognitive impairment among 65-79 year olds but not 80+ year olds, and among APOE $\epsilon$ 4 non-carriers but not $\epsilon$ 4 carriers. These are stratified results, no interaction terms had $p < 0.05$ . | None                                                                                                                                                                     | N/A          |
| Zijlema (2017) | None                                                                                    | N/A                                                                                                                                                                                                                                                            | Physical activity<br>Social interaction<br>Loneliness<br>Neighborhood social cohesion<br>Perceived mental health<br>Traffic noise annoyance<br>Worry about air pollution | No mediation |

---

Abbreviations: APOE = apolipoprotein E; BMI = body mass index; PM = particulate matter

For peer review only

## Preferred Reporting Items for Systematic reviews and Meta-Analyses extension for Scoping Reviews (PRISMA-ScR) Checklist

| SECTION                                               | ITEM | PRISMA-ScR CHECKLIST ITEM                                                                                                                                                                                                                                                                                  | REPORTED ON PAGE #      |
|-------------------------------------------------------|------|------------------------------------------------------------------------------------------------------------------------------------------------------------------------------------------------------------------------------------------------------------------------------------------------------------|-------------------------|
| <b>TITLE</b>                                          |      |                                                                                                                                                                                                                                                                                                            |                         |
| Title                                                 | 1    | Identify the report as a scoping review.                                                                                                                                                                                                                                                                   | 1                       |
| <b>ABSTRACT</b>                                       |      |                                                                                                                                                                                                                                                                                                            |                         |
| Structured summary                                    | 2    | Provide a structured summary that includes (as applicable): background, objectives, eligibility criteria, sources of evidence, charting methods, results, and conclusions that relate to the review questions and objectives.                                                                              | 2                       |
| <b>INTRODUCTION</b>                                   |      |                                                                                                                                                                                                                                                                                                            |                         |
| Rationale                                             | 3    | Describe the rationale for the review in the context of what is already known. Explain why the review questions/objectives lend themselves to a scoping review approach.                                                                                                                                   | 5-6                     |
| Objectives                                            | 4    | Provide an explicit statement of the questions and objectives being addressed with reference to their key elements (e.g., population or participants, concepts, and context) or other relevant key elements used to conceptualize the review questions and/or objectives.                                  | 6                       |
| <b>METHODS</b>                                        |      |                                                                                                                                                                                                                                                                                                            |                         |
| Protocol and registration                             | 5    | Indicate whether a review protocol exists; state if and where it can be accessed (e.g., a Web address); and if available, provide registration information, including the registration number.                                                                                                             | N/A                     |
| Eligibility criteria                                  | 6    | Specify characteristics of the sources of evidence used as eligibility criteria (e.g., years considered, language, and publication status), and provide a rationale.                                                                                                                                       | 7-8                     |
| Information sources*                                  | 7    | Describe all information sources in the search (e.g., databases with dates of coverage and contact with authors to identify additional sources), as well as the date the most recent search was executed.                                                                                                  | 7-8                     |
| Search                                                | 8    | Present the full electronic search strategy for at least 1 database, including any limits used, such that it could be repeated.                                                                                                                                                                            | 7-8, Suppl Fig 1, Fig 1 |
| Selection of sources of evidence†                     | 9    | State the process for selecting sources of evidence (i.e., screening and eligibility) included in the scoping review.                                                                                                                                                                                      | 7-8                     |
| Data charting process‡                                | 10   | Describe the methods of charting data from the included sources of evidence (e.g., calibrated forms or forms that have been tested by the team before their use, and whether data charting was done independently or in duplicate) and any processes for obtaining and confirming data from investigators. | 8                       |
| Data items                                            | 11   | List and define all variables for which data were sought and any assumptions and simplifications made.                                                                                                                                                                                                     | 8                       |
| Critical appraisal of individual sources of evidence§ | 12   | If done, provide a rationale for conducting a critical appraisal of included sources of evidence; describe the methods used and how this information was used in any data synthesis (if appropriate).                                                                                                      | n/a                     |

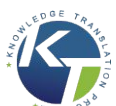

| SECTION                                       | ITEM | PRISMA-ScR CHECKLIST ITEM                                                                                                                                                                       | REPORTED ON PAGE #         |
|-----------------------------------------------|------|-------------------------------------------------------------------------------------------------------------------------------------------------------------------------------------------------|----------------------------|
| Synthesis of results                          | 13   | Describe the methods of handling and summarizing the data that were charted.                                                                                                                    | 8                          |
| <b>RESULTS</b>                                |      |                                                                                                                                                                                                 |                            |
| Selection of sources of evidence              | 14   | Give numbers of sources of evidence screened, assessed for eligibility, and included in the review, with reasons for exclusions at each stage, ideally using a flow diagram.                    | Fig 1                      |
| Characteristics of sources of evidence        | 15   | For each source of evidence, present characteristics for which data were charted and provide the citations.                                                                                     | 8-14                       |
| Critical appraisal within sources of evidence | 16   | If done, present data on critical appraisal of included sources of evidence (see item 12).                                                                                                      | n/a                        |
| Results of individual sources of evidence     | 17   | For each included source of evidence, present the relevant data that were charted that relate to the review questions and objectives.                                                           | Table 1-3, Suppl table 1-4 |
| Synthesis of results                          | 18   | Summarize and/or present the charting results as they relate to the review questions and objectives.                                                                                            | Table 1-3, Suppl table 1-4 |
| <b>DISCUSSION</b>                             |      |                                                                                                                                                                                                 |                            |
| Summary of evidence                           | 19   | Summarize the main results (including an overview of concepts, themes, and types of evidence available), link to the review questions and objectives, and consider the relevance to key groups. | 14-19                      |
| Limitations                                   | 20   | Discuss the limitations of the scoping review process.                                                                                                                                          | 20                         |
| Conclusions                                   | 21   | Provide a general interpretation of the results with respect to the review questions and objectives, as well as potential implications and/or next steps.                                       | 21                         |
| <b>FUNDING</b>                                |      |                                                                                                                                                                                                 |                            |
| Funding                                       | 22   | Describe sources of funding for the included sources of evidence, as well as sources of funding for the scoping review. Describe the role of the funders of the scoping review.                 | 4                          |

JBI = Joanna Briggs Institute; PRISMA-ScR = Preferred Reporting Items for Systematic reviews and Meta-Analyses extension for Scoping Reviews.

\* Where *sources of evidence* (see second footnote) are compiled from, such as bibliographic databases, social media platforms, and Web sites.

† A more inclusive/heterogeneous term used to account for the different types of evidence or data sources (e.g., quantitative and/or qualitative research, expert opinion, and policy documents) that may be eligible in a scoping review as opposed to only studies. This is not to be confused with *information sources* (see first footnote).

‡ The frameworks by Arksey and O'Malley (6) and Levac and colleagues (7) and the JBI guidance (4, 5) refer to the process of data extraction in a scoping review as data charting.

§ The process of systematically examining research evidence to assess its validity, results, and relevance before using it to inform a decision. This term is used for items 12 and 19 instead of "risk of bias" (which is more applicable to systematic reviews of interventions) to include and acknowledge the various sources of evidence that may be used in a scoping review (e.g., quantitative and/or qualitative research, expert opinion, and policy document).

From: Tricco AC, Lillie E, Zarin W, O'Brien KK, Colquhoun H, Levac D, et al. PRISMA Extension for Scoping Reviews (PRISMA-ScR): Checklist and Explanation. *Ann Intern Med.* 2018;169:467–473. doi: [10.7326/M18-0850](https://doi.org/10.7326/M18-0850).

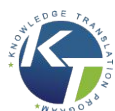

# BMJ Open

## Outdoor green space exposure and brain health measures related to Alzheimer's disease: A rapid review

|                                 |                                                                                                                                        |
|---------------------------------|----------------------------------------------------------------------------------------------------------------------------------------|
| Journal:                        | <i>BMJ Open</i>                                                                                                                        |
| Manuscript ID                   | bmjopen-2020-043456.R1                                                                                                                 |
| Article Type:                   | Original research                                                                                                                      |
| Date Submitted by the Author:   | 12-Nov-2020                                                                                                                            |
| Complete List of Authors:       | Besser, Lilah ; Florida Atlantic University, Institute for Human Health and Disease Intervention                                       |
| <b>Primary Subject Heading</b>: | Public health                                                                                                                          |
| Secondary Subject Heading:      | Geriatric medicine                                                                                                                     |
| Keywords:                       | Delirium & cognitive disorders < PSYCHIATRY, Old age psychiatry < PSYCHIATRY, PUBLIC HEALTH, PREVENTIVE MEDICINE, Dementia < NEUROLOGY |
|                                 |                                                                                                                                        |

SCHOLARONE™  
Manuscripts





I, the Submitting Author has the right to grant and does grant on behalf of all authors of the Work (as defined in the below author licence), an exclusive licence and/or a non-exclusive licence for contributions from authors who are: i) UK Crown employees; ii) where BMJ has agreed a CC-BY licence shall apply, and/or iii) in accordance with the terms applicable for US Federal Government officers or employees acting as part of their official duties; on a worldwide, perpetual, irrevocable, royalty-free basis to BMJ Publishing Group Ltd ("BMJ") its licensees and where the relevant Journal is co-owned by BMJ to the co-owners of the Journal, to publish the Work in this journal and any other BMJ products and to exploit all rights, as set out in our [licence](#).

The Submitting Author accepts and understands that any supply made under these terms is made by BMJ to the Submitting Author unless you are acting as an employee on behalf of your employer or a postgraduate student of an affiliated institution which is paying any applicable article publishing charge ("APC") for Open Access articles. Where the Submitting Author wishes to make the Work available on an Open Access basis (and intends to pay the relevant APC), the terms of reuse of such Open Access shall be governed by a Creative Commons licence – details of these licences and which [Creative Commons](#) licence will apply to this Work are set out in our licence referred to above.

Other than as permitted in any relevant BMJ Author's Self Archiving Policies, I confirm this Work has not been accepted for publication elsewhere, is not being considered for publication elsewhere and does not duplicate material already published. I confirm all authors consent to publication of this Work and authorise the granting of this licence.

1  
2  
3 **Outdoor green space exposure and brain health measures related to Alzheimer's**  
4 **disease: A rapid review**  
5

6 Lilah M. Besser, PhD MSPH<sup>a</sup>  
7

8 <sup>a</sup> Institute for Human Health and Disease Intervention (I-HEALTH), School of Urban and  
9 Regional Planning, Florida Atlantic University, Boca Raton, Florida, US, [lbesser@fau.edu](mailto:lbesser@fau.edu)  
10

11 **Corresponding author:**

12 Lilah Besser  
13 777 Glades Road, SO-284H  
14 Institute for Human Health and Disease Intervention  
15 School of Urban and Regional Planning  
16 Florida Atlantic University  
17 Boca Raton, FL 33431  
18 1-561-297-0614  
19 [lbesser@fau.edu](mailto:lbesser@fau.edu)  
20  
21  
22

23 Abstract: 277

24 Text: 5,390

25 Tables: 4

26 Figures: 4

27 Supplemental data: 1 figure, 1 text, 4 tables  
28  
29  
30  
31  
32  
33  
34  
35  
36  
37  
38  
39  
40  
41  
42  
43  
44  
45  
46  
47  
48  
49  
50  
51  
52  
53  
54  
55  
56  
57  
58  
59  
60

1  
2  
3 **Data Availability Statement**  
4

5 De-identified data (i.e., search results from the databases) are available upon request of the  
6 author, Dr. Besser ([lbesser@fau.edu](mailto:lbesser@fau.edu)). Any re-use or sharing of these data require Dr. Besser's  
7 approval.  
8  
9  
10  
11  
12  
13  
14  
15  
16  
17  
18  
19  
20  
21  
22  
23  
24  
25  
26  
27  
28  
29  
30  
31  
32  
33  
34  
35  
36  
37  
38  
39  
40  
41  
42  
43  
44  
45  
46  
47  
48  
49  
50  
51  
52  
53  
54  
55  
56  
57  
58  
59  
60

For peer review only

## Abstract

**Objectives:** Summarize studies of outdoor green space exposure and brain health measures related to Alzheimer's disease and related disorders (ADRD), and determine scientific gaps for future research.

**Design:** Rapid review of primary research studies.

**Methods and outcomes:** PubMed, Embase, and Web of Science Core Collection were searched for articles meeting the criteria published on/before February 13, 2020. The review excluded papers not in English, focused on transient states (e.g., mental fatigue), or not using individual-level measures of brain health (e.g., average school test scores). Brain health measures of interest included cognitive function, clinical diagnosis of cognitive impairment/dementia/ADRD, and brain biomarkers such as those from magnetic resonance imaging (MRI), measures typically associated with ADRD risk and disease progression.

**Results:** Twenty-two papers were published from 2012-2020, 36% on <18 year-olds, 32% on 18-64 year-olds, and 59% on ≥65 year-olds. Sixty-four percent defined green space based on the normalized difference vegetation index ("greenness"/healthy vegetation) and 68% focused on cognitive measures of brain health (e.g., memory). Seventeen studies (77%) found green space-brain health associations (14 positive, four inverse). Greater greenness/green space was positively associated various cognitive domains in 10 studies and with MRI outcomes (regional brain volumes, cortical thickness, amygdala integrity) in three studies. Greater neighborhood greenness was associated with lower odds/risk of cognitive impairment/ADRD in some studies but increased odds/risk in others (n=4 studies).

**Conclusions:** Published studies suggest positive green space-brain health associations across the life course, but the methods and cohorts were limited and heterogeneous. Future research using racially/ethnically and geographically diverse cohorts, life course methods, and more specific green space and brain health measures (e.g., time spent in green spaces, ADRD biomarkers) will strengthen evidence for causal associations.

**Keywords:** greenspaces, park, greenness, cognition, cognitive, dementia, MRI, ADRD

### Strengths and limitations of this study

- Three major databases covering biomedical, psychological, environmental, and social science topics and a range of keywords were searched to find pertinent studies regarding associations between green space exposure and Alzheimer's disease and related disorders brain health measures.
- Published literature reviews on green space and health and reference lists from the final sample of papers were reviewed to help ensure pertinent papers were included.
- This study was limited to a single reviewer and thus, the methods used to search, screen, select, and chart the final sample of papers could not be duplicated/adjudicated by additional reviewers.
- As a rapid review, this study was not aimed at providing a quantitative evaluation of the evidence or risk of bias, and may have missed papers that would have been ascertained if additional reviewers were available.

## Funding

Dr. Besser is supported by National Institutes of Health/National Institute on Aging award K01AG063895.

## Competing Interests

The author has no competing interests to declare.

## Introduction

Nature contact involves time spent in green spaces (e.g., gardens, parks, forests) and blue spaces (e.g., lakes, rivers) where people live, work, and play. Preliminary studies suggest associations between nature contact and health including reductions in depression, anxiety, and cardiovascular risk factors; improved attention and mood; and increased physical activity.<sup>1</sup> Studies also suggest associations with brain health across the life course.<sup>2-8</sup> For instance, greater neighborhood greenness (i.e., healthy vegetation) has been associated with lower odds of Alzheimer's disease (AD) in older adults.<sup>9</sup>

AD and related disorders (ADRD) affect approximately 50 million people worldwide, and 15% of older adults have mild cognitive impairment, a frequent antecedent to dementia.<sup>10 11</sup> Older age, lower educational attainment, and genetics (e.g., apolipoprotein E  $\epsilon$ 4 allele carriers) are some of the strongest predictors of AD risk and late-life cognitive decline.<sup>12</sup> Clinicians diagnose AD using biomarkers and/or cognitive assessments. Diagnostic biomarkers include cerebrospinal fluid (CSF) or positron emission (PET) scan biomarkers measuring brain amyloid beta and phosphorylated tau (p-tau), the proteins responsible for AD neuropathology (i.e., plaques and tangles).<sup>13 14</sup> Cognitive tests for AD typically evaluate memory of personal events (i.e., episodic memory), the hallmark cognitive domain affected early in the disease course.<sup>15</sup> Episodic memory problems are correlated with atrophy of the hippocampus, and thus, magnetic resonance imaging (MRI) brain biomarkers such as hippocampal atrophy help support AD diagnosis and predict AD incidence and disease progression.<sup>16</sup> Other dementia disorders typically affect different cognitive domains/brain regions in the early stages of disease, and later stages of ADRD can affect additional cognitive domains and brain regions.<sup>15</sup>

1  
2  
3 The psychological and financial burden of ADRD on patients and families is substantial.<sup>17 18</sup>  
4  
5 Health care systems are ill prepared to deal with the increase in ADRD prevalence  
6  
7 accompanying the rapidly rising population of older adults<sup>19</sup>, and no effective treatments are  
8  
9 currently available. Therefore, an accumulating body of research has focused on individual- and  
10  
11 community-level interventions that may help prevent or delay ADRD. Provided there is  
12  
13 supporting evidence, neighborhood green space is one such community-level feature that may  
14  
15 be promoted to improve lifelong brain health. Healthy brain development during childhood and  
16  
17 maintenance of brain health throughout adulthood, assisted by living near health-enhancing  
18  
19 green spaces, may help reduce ADRD risk.  
20  
21  
22  
23

24 Green space exposure may benefit brain health through a number of pathways.<sup>1 20</sup> They provide  
25  
26 enriching, physical activity promoting, and stress reducing environments that consequently may  
27  
28 be associated with better brain health by affecting cerebral blood flow, angiogenesis, vascular  
29  
30 integrity, cell proliferation/survival, vascular dysregulation, and/or inflammation.<sup>21-23 24 25</sup> Green  
31  
32 space exposure may reduce stress and mental fatigue and improve attention, consistent with  
33  
34 the Stress Recovery Theory and Attention Restoration Theory.<sup>26-28</sup> Studies are available to  
35  
36 support both theories. For instance, living within one mile of green spaces and visiting green  
37  
38 spaces have been associated with experiencing less stress<sup>29</sup>, and gardening has been found to  
39  
40 reduce levels of salivary cortisol, a stress hormone.<sup>30</sup> In adults, mood, restoration, and  
41  
42 sustained attention were improved after participating in a nature walk intervention in urban and  
43  
44 rural locales.<sup>28</sup> These psychological benefits over the long term may additionally benefit mental  
45  
46 health (e.g., anxiety, depression), factors associated with brain health including ADRD risk.<sup>31</sup>  
47  
48 Microbial and antigenic exposures from nature contact<sup>32</sup>, especially during childhood, may affect  
49  
50 lifelong immune function and contribute to healthy microbiomes, which have been associated  
51  
52 with mental health and AD.<sup>33-35</sup> Green spaces provide areas for recreational exercise. Exposure  
53  
54 and access to natural places have been associated with greater physical activity in children  
55  
56  
57  
58  
59  
60



1  
2  
3 through older adults<sup>36 37</sup>, and obtaining greater physical activity has been associated with  
4 reduced brain atrophy, cognitive decline, and ADRD risk.<sup>38 39</sup> Natural areas provide spaces for  
5 social gathering and engagement.<sup>40</sup> Higher levels of social engagement have been associated  
6 with better cognitive function and reduced AD risk.<sup>41 42</sup> Lastly, natural areas and parks have  
7 been associated with lower levels of harmful air pollutants, including PM<sub>10</sub> and NO<sub>2</sub><sup>43 44</sup> that  
8 have been associated with worse cognition and greater ADRD risk.<sup>45</sup> The mechanisms by  
9 which air pollution affects the brain have been hypothesized to be direct and/or indirect (e.g.,  
10 systemic inflammation, adsorbed compounds).<sup>46</sup>  
11  
12  
13  
14  
15  
16  
17  
18  
19  
20  
21

22 The budding and cross-disciplinary field of research on green spaces and ADRD/brain health  
23 will benefit from a review of pertinent studies spanning multiple disciplines. Literature used to  
24 inform primary research tends to be siloed to a researcher's area of expertise or based on  
25 limited or discipline-specific search terms. Given the nascent state of green space and ADRD-  
26 related brain health research and the lack of published literature reviews focused on the topic,  
27 this rapid review employed scoping aims. Rapid reviews are increasingly used in research to  
28 address the need for more readily available summaries of available evidence that cannot be  
29 achieved through the lengthy and resource-intensive process of systematic reviews.<sup>47</sup> Scoping  
30 reviews are useful in summarizing new topics of research, findings for a broader set of health  
31 outcomes, or topics that may not have enough evidence amassed to assess the weight of  
32 evidence or risk of bias.<sup>47-49</sup>  
33  
34  
35  
36  
37  
38  
39  
40  
41  
42  
43  
44  
45  
46

47 The number of studies on green space and health has risen dramatically in the last decade<sup>50</sup>,  
48 but it remains unclear how many studied brain health outcomes. Therefore, consistent with the  
49 major goals of a scoping review<sup>48 49 51 52</sup>, this rapid review aimed: 1) to summarize the extant  
50 literature on green space-brain health associations across the life course, potentially providing  
51 impetus for future systematic reviews, and 2) to identify knowledge gaps to inform future  
52  
53  
54  
55  
56  
57  
58  
59  
60

1  
2  
3 research. The primary intent was to identify and describe current evidence for benefits to  
4 cognition and brain structure/function due to green space exposure. These benefits may  
5 develop and persist in early- and mid-life to reduce ADRD risk in late-life.  
6  
7  
8  
9

## 10 11 **Methods**

### 12 **Patient and Public Involvement**

13  
14 Patients and the public were not involved as this study focuses on a review of published papers  
15 with no analysis of participant data.  
16  
17  
18  
19  
20  
21

### 22 **Identification and study selection**

23  
24 A single reviewer was available for this study. On February 13, 2020, PubMed, Web of Science  
25 Core Collection, and Embase were queried for the following keywords: “greenspace or green  
26 space or greenness or parks or park or park space or parkspace” and “cognition or cognitive or  
27 memory or brain aging or Alzheimer or Alzheimer’s or dementia or cognitive impairment”. To  
28 help ensure the February 13 review did not miss pertinent papers, a second search of the three  
29 databases was performed on July 18, 2020, for the following keywords: “neighborhood  
30 environment or wilderness or greenery or natural space or natural environment or public garden  
31 or recreational resource or NDVI or normalized difference vegetation index or built environment  
32 or open space or woodland” and “brain volume or brain atrophy or neurodegenerative disease  
33 or Alzheimer biomarker or cognition or cognitive or memory or brain aging or Alzheimer or  
34 Alzheimer’s or dementia or cognitive impairment”. The keywords searched reflected the brain  
35 health measures of interest that are typically associated with ADRD risk/disease progression,  
36 including cognitive function, clinical diagnosis of cognitive impairment/dementia/ADRD, and  
37 biomarkers such as those from brain imaging (e.g., MRI).  
38  
39  
40  
41  
42  
43  
44  
45  
46  
47  
48  
49  
50  
51  
52  
53  
54  
55  
56  
57  
58  
59  
60

1  
2  
3 The July 18, 2020 search was restricted to papers published on or before February 13, 2020, to  
4 be consistent with the original search. A limitation of the July 18, 2020 search was the restriction  
5 to a search of titles in Web of Science. A full text search led to 8,574 papers that could not be  
6 feasibly reviewed based on available time and resources (i.e., this is a rapid review). Of note,  
7 the final list of included papers from the February 13 search was ascertained either from the  
8 search of PubMed and Embase or the review of resulting titles from the search of full texts in  
9 Web of Science (i.e., not from a full text review of papers in Web of Science). This suggests that  
10 the July search of titles in Web of Science was unlikely to have missed pertinent papers, but the  
11 possibility remains. A detailed description of the search strategy is provided in Supplemental  
12 Figure 1.  
13  
14  
15  
16  
17  
18  
19  
20  
21  
22  
23  
24  
25

26 Titles were screened for topics definitely or possibly related to green space and ADRD-related  
27 brain health. Titles potentially related were included in the abstract review (e.g., green space  
28 and child development, neighborhood environment and Alzheimer's disease, built environments  
29 and aging, outdoors and mental health). After review, abstracts that moved on to full text review  
30 had exposures/outcomes directly pertinent to this study, focused on associations between green  
31 space and other measures but mentioned brain health measures as covariates, or seemed  
32 possibly relevant by including closely related exposures or outcomes (e.g., mental health, frailty,  
33 built environment, nature contact). Full texts included in the final sample reported associations  
34 between green space exposure and brain health outcomes in the main text or supplement.  
35  
36  
37  
38  
39  
40  
41  
42  
43  
44  
45  
46

47 Articles were excluded if they: 1) were not in English; 2) were not primary research studies; 3)  
48 were focused on indoor green space/views; 4) used virtual reality to simulate green spaces; 5)  
49 were ecological studies (e.g., average school test scores); 6) were focused on attention  
50 restoration or mental fatigue (transient states); or 7) centered on green space activities such as  
51 gardening without an adequate control/comparison group to sufficiently capture green space as  
52  
53  
54  
55  
56  
57  
58  
59  
60

1  
2  
3 the main exposure. Reference lists from the final sample and published green space-health  
4 reviews were reviewed to identify other studies meeting the eligibility criteria.<sup>1-8</sup>  
5  
6  
7

### 8 9 **Charting and summarizing the data**

10  
11 Papers were described by study design, location, age groups, green space and brain health  
12 measures and definitions, statistical methods, and main findings (these data were charted into  
13 the Supplemental Tables 1-4). Key study elements were tabulated separately for three major  
14 age groups: children (0-17 years), adults (18-64 years), and older adults ( $\geq 65$  years). Findings  
15 were stratified by age because while studies of children focus on the critical period of childhood  
16 development, studies of 18-64 year olds focus on working adults and studies of  $\geq 65$  year olds  
17 focus on retirement-age individuals. Green space exposures and brain health can differ  
18 substantially during these life stages. Results (positive, inverse, null associations) were  
19 summarized according to age groups, green space measures, brain health measures, and  
20 examined green space-brain health associations to characterize the scope of the evidence to  
21 date.  
22  
23  
24  
25  
26  
27  
28  
29  
30  
31  
32  
33  
34  
35  
36

## 37 **Results**

### 38 *Overall study characteristics*

39  
40 The final sample included 22 papers (Figure 1).<sup>9 53-73</sup> Posthoc additions to the final sample,  
41 published on or before February 13, 2020, included one paper previously known by the author<sup>53</sup>  
42 and one paper identified from the final sample reference lists.<sup>73</sup> Tables 1-4 and Supplemental  
43 Tables 1-4 summarize study characteristics and findings. Eight-two percent ( $n=18^9 54-58 60-64 66-69$   
44 <sup>71-73</sup>) of studies were published on/after 2017 (range: 2012-2020). Seven studies (32%) were in  
45 the United Kingdom, four (18%) in China, three in Spain (14%), two each (9%) in the US and  
46 Canada, and one each (4%) in Bulgaria, Germany, New Zealand, and multiple regions (Spain,  
47 UK, the Netherlands) (Figure 2). Eight studies (36%) focused on <18 year olds (childhood)<sup>54 56 63</sup>  
48  
49  
50  
51  
52  
53  
54  
55  
56  
57  
58  
59  
60

1  
2  
3 65-68 70, seven (32%) focused on 18-64 year olds (adulthood)<sup>53 55 57 60 62 63 72</sup>, and 13 (59%)  
4  
5 focused on ≥65 year olds (older adulthood)<sup>9 53 55 58-64 69 71 73</sup> (Figure 3). Fourteen studies (64%)<sup>9</sup>  
6  
7 53-64 68 were based on population-based cohorts or random sampling strategies. Two studies  
8  
9 (9%) examined life course associations, both investigating childhood and mid-life park space  
10  
11 exposures and cognitive change in late-life.<sup>63 64</sup>  
12  
13  
14  
15

16 Seventeen studies (77%) found associations (14 positive<sup>9 54-56 60-67 72 73</sup>, four inverse<sup>57-60</sup>) and five  
17  
18 (23%) found no associations<sup>53 68-71</sup> between greenness/green space and brain health (Tables 1-  
19  
20 4, Figure 4). Twelve studies (55%) reported a combination of positive, inverse, and/or null  
21  
22 associations.<sup>54 55 57 58 60 62-66 72 73</sup> All but one study<sup>69</sup> employed multivariable linear or logistic  
23  
24 regression accounting for key confounders (i.e., age, sex, socioeconomic status [SES]) and  
25  
26 twelve (55%)<sup>9 53-56 58 59 61 62 64 65 70</sup> used regression methods accounting for data clustering/multi-  
27  
28 level data.  
29  
30  
31  
32

### 33 *Findings by age group*

34  
35 *Children.* Five<sup>54 56 65-67</sup> of the eight studies<sup>54 56 63 65-68 70</sup> found green space-brain health  
36  
37 associations in children (five positive, zero inverse) (Table 1). Greater neighborhood  
38  
39 greenness/green space was associated with working memory<sup>54 56</sup>, attention<sup>54 65</sup>, and intellectual  
40  
41 development<sup>67</sup> and with specific brain regions.<sup>66</sup> Null associations were found between greater  
42  
43 greenness/green space and intelligence<sup>63</sup>, alerting<sup>65</sup>, orienting<sup>65</sup>, executive processing/function<sup>65</sup>  
44  
45 68, fluid ability<sup>68</sup>, crystallized ability<sup>68</sup>, working memory<sup>68</sup>, and attention.<sup>54 65 68</sup> Time spent in  
46  
47 green space measured via global positioning system (GPS) tracking was not associated with  
48  
49 multiple cognitive domains (e.g., visual and verbal memory, processing speed).<sup>70</sup>  
50  
51  
52  
53

54 *Adults (18-64 years).* Five of the seven studies<sup>53 55 57 60 63 72</sup> found green space-brain health  
55  
56 associations in adults (four positive<sup>55 60 62 72</sup>, two inverse<sup>57 60</sup>) (Table 1). Increased residential  
57  
58  
59  
60

1  
2  
3 distance to natural outdoor environments was associated with longer cognitive test completion  
4 times<sup>62</sup>, and greater neighborhood greenness was positively and inversely associated with  
5 dementia diagnoses (detailed in “Older adults” section below).<sup>60</sup> Greater neighborhood  
6 greenness was cross-sectionally associated with better global cognition<sup>72</sup> and was associated  
7 with slower longitudinal decline on global cognition, reasoning, and verbal fluency.<sup>55</sup>  
8  
9 Additionally, greater neighborhood green space was associated with greater cortical thickness  
10 in the prefrontal cortex, bilateral fusiform gyrus, left precuneus and insula, and right cuneus as  
11 measured via MRI.<sup>72</sup> Null associations were found between greater neighborhood  
12 greenness/green space or five-year change in greenness and measures of global cognition<sup>53 72</sup>,  
13 intelligence<sup>63</sup>, reaction time<sup>57</sup>, reasoning<sup>57</sup>, memory<sup>55 57 72</sup>, naming<sup>72</sup>, and visual  
14 attention/executive processing.<sup>62</sup> No associations were found between self-reported visits or  
15 time spent in natural environments and visual attention/executive processing<sup>62</sup>, and no  
16 associations were observed between greater greenness and cortical thickness of other brain  
17 MRI regions (e.g., right cuneus and insula).<sup>72</sup> Lastly, inverse associations were found between  
18 five-year change in neighborhood greenness and reasoning.<sup>57</sup>  
19  
20  
21  
22  
23  
24  
25  
26  
27  
28  
29  
30  
31  
32  
33  
34  
35  
36

37 *Older adults (≥65 years)*. Ten of 13 studies<sup>9 53 55 58-64 69 71 73</sup> found green space-brain health  
38 associations in older adults (eight positive<sup>9 55 60-64 73</sup>, three inverse<sup>58-60</sup>) (Table 1). Greater  
39 neighborhood greenness was associated with lower risk of Alzheimer’s disease<sup>9</sup>, non-  
40 Alzheimer’s disease<sup>60</sup> and Parkinson’s disease diagnoses<sup>60</sup> in some studies, but increased risk  
41 of cognitive impairment<sup>58 59</sup> and Alzheimer’s disease diagnoses<sup>60</sup> in others. Greater  
42 neighborhood greenness/green space was positively associated with intelligence<sup>63 64</sup>, global  
43 cognition<sup>55</sup>, reasoning<sup>55</sup>, verbal fluency<sup>55</sup>, and visual attention/executive processing.<sup>55 62-64</sup> In  
44 addition, greater green space (i.e., forests) was associated with better amygdala integrity  
45 measured via MRI.<sup>73</sup> Null associations were found between neighborhood greenness/green  
46 space and intelligence<sup>63 64</sup>, global cognition<sup>53 69 71</sup>, short-term memory<sup>55</sup> and visual  
47  
48  
49  
50  
51  
52  
53  
54  
55  
56  
57  
58  
59  
60

1  
2  
3 attention/executive processing.<sup>62</sup> Time spent in natural environments was not associated with  
4 visual attention/executive processing.<sup>62</sup> Lastly, urban green space was not associated with brain  
5 integrity measured via MRI.<sup>73</sup>  
6  
7

#### 8 *Findings by green space measure*

9  
10 Green space definitions included: 1) greenness measured using the normalized difference  
11 vegetation index (NDVI) or enhanced vegetation index (EVI)<sup>9 54 55 57 60-62 65-69 71 72</sup>; 2) tree  
12 canopy/cover measured using vegetation continuous fields (VCF)<sup>54</sup>; 3) neighborhood  
13 percentage green/park space or park area<sup>53 56 58 59 63 64 73</sup>; 4) time spent in green space (objective  
14 or self-reported)<sup>62 70</sup>; 5) self-reported amount of natural environment near residence<sup>62</sup>; and 6)  
15 distance from residence to natural outdoor environment<sup>62</sup> (Table 2). Three studies examined  
16 more than one green space measure: 1) NDVI and VCF<sup>54</sup>; 2) NDVI and EVI<sup>55</sup>; and 3) NDVI,  
17 distance to natural outdoor environment, and self-reported green space measures.<sup>62</sup> Most  
18 studies measured green space in the residential neighborhood, although a few additionally  
19 measured green space surrounding schools and school routes.<sup>64 65</sup> No studies examined work  
20 area green spaces. NDVI was the most commonly used measure. The boundaries used to  
21 define green space exposures varied greatly (e.g., 100 to 1,500m radial buffers around  
22 residences, 1000m buffers around postcode centroids, US Census tracts, 50m buffers around  
23 school route).  
24  
25  
26  
27  
28  
29  
30  
31  
32  
33  
34  
35  
36  
37  
38  
39  
40  
41  
42

43 **NDVI.** Ten of 14 studies<sup>9 54 55 57 60-62 65-69 71 72</sup> using NDVI found associations (nine positive<sup>9 54 55 60</sup>  
44 <sup>61 65-67 72</sup>, two inverse<sup>57 60</sup>) (Table 2). Of the studies with positive findings, one examined MRI  
45 brain measures<sup>66</sup> and three examined risk/odds of cognitive impairment/dementia.<sup>9 60 61</sup> The  
46 remaining studies with positive findings focused on various cognitive domains. In studies with  
47 inverse associations, five-year NDVI increase was associated with worse reasoning in 40-69  
48 year olds<sup>57</sup> and greater greenness was associated with lower risk of non-Alzheimer's disease  
49 dementia and Parkinson's disease among 45-84 year olds.<sup>60</sup>  
50  
51  
52  
53  
54  
55  
56  
57  
58  
59  
60

1  
2  
3  
4  
5 *Park space.* Two<sup>63 64</sup> of three studies on percent/amount of residential park space found positive  
6 associations with cognitive change in late-life (Table 2). These positive associations were  
7 restricted to childhood and mid-life park space exposures and cognitive changes from ages 70  
8 to 76. No associations were observed between early- and mid-life exposures and cognitive  
9 changes from ages 11 to 76 or between late-life park space exposure and cognitive changes at  
10 any age (11-76 years). The third study found no associations between neighborhood park area  
11 and cognition.<sup>53</sup>

12  
13  
14  
15  
16  
17  
18  
19  
20  
21  
22 *Other measures.* Measures of time spent in green space based on objective GPS tracking<sup>70</sup> or  
23 self-report<sup>62</sup> were not associated with cognition. Positive associations were observed between  
24 percentage residential green space derived from land use data and spatial working memory<sup>56</sup>,  
25 and between distance to the nearest natural outdoor environment and visual attention/executive  
26 processing.<sup>62</sup> Greater amounts of forest surrounding the residence were associated with greater  
27 amygdala integrity, whereas amount of neighborhood urban green space was not associated  
28 with MRI measures of brain integrity.<sup>73</sup> Percentage green space and private gardens based on  
29 land use data was inversely associated with odds of cognitive impairment/dementia.<sup>58 59</sup> Tree  
30 canopy/cover (VCF) was not associated with attention in children.<sup>54</sup> Lastly, self-reported  
31 amount of residential natural environment was not associated with visual attention/executive  
32 processing.<sup>62</sup>

### 33 34 35 36 37 38 39 40 41 42 43 44 45 46 47 *Findings by brain health measure*

48  
49 Fifteen studies (68%) examined cognitive function.<sup>53-57 62-65 67-72</sup> A range of cognitive domains  
50 were assessed, including but not limited to global cognition, working memory, attention,  
51 reasoning, verbal fluency, and executive function. Five studies (23%)<sup>58 59 61 69 71</sup> used the Mini  
52 Mental State Exam (MMSE), a global cognition screening test, while the remaining used a  
53  
54  
55  
56  
57  
58  
59  
60



1  
2  
3 variety of other instruments. Five studies (23%)<sup>9 58-61</sup> examined diagnosis of cognitive  
4  
5 impairment or dementia (including Alzheimer's and Parkinson disease) and three focused on  
6  
7 brain MRI.<sup>66 72 73</sup> Eight studies (36%)<sup>54 55 60 61 63-65 68</sup> used longitudinal data on brain health, but  
8  
9 only five (23%)<sup>55 60 63-65</sup> actually examined longitudinal changes in brain health (i.e., cognitive  
10  
11 decline or dementia risk).  
12

13  
14  
15 Ten studies (45%) found associations between green space and cognition (9 positive<sup>54-56 62-65 67</sup>  
16  
17 <sup>72</sup>, 1 inverse<sup>57</sup>) (Table 3). Greater greenness/green space was associated with global cognition,  
18  
19 working memory, spatial working memory attention, visual attention, reasoning, fluency, and  
20  
21 measures of intelligence and childhood intellectual development, as delineated in the sections  
22  
23 further above. The three studies using brain MRI found positive associations between  
24  
25 greenness/green space and certain brain regions<sup>66</sup>, cortical thickness<sup>72</sup>, and amygdala  
26  
27 integrity.<sup>73</sup> Two studies found positive associations between greenness/green space and  
28  
29 Alzheimer's disease<sup>9</sup>, non-Alzheimer's dementia<sup>60</sup>, and Parkinson's disease<sup>60</sup> diagnoses,  
30  
31 whereas three found inverse associations with Alzheimer's disease<sup>60</sup> or cognitive  
32  
33 impairment/dementia diagnoses.<sup>58 59</sup>  
34  
35  
36  
37  
38

### 39 *Effect modification*

40  
41 Effect modification is variation in the association between an exposure and outcome depending  
42  
43 on the value of another factor. Seven<sup>55 57 58 61 63 64 67</sup> of 11 studies<sup>9 54-58 61 63-65 67</sup> found effect  
44  
45 modification (Supplemental Table 4). Green space-brain health associations were stronger  
46  
47 in/limited to women<sup>55 57 63</sup>; APOE  $\epsilon$ 4 non-carriers<sup>61 63</sup>; and those with lower occupational class<sup>63</sup>,  
48  
49 higher education levels<sup>55</sup>, lower BMI<sup>67</sup>, and younger age<sup>61</sup> (in study of older adults). Associations  
50  
51 also were stronger among residents of conurbations<sup>58</sup> (urbanized area composed of multiple  
52  
53 cities/towns), areas with lower traffic accident densities<sup>64</sup>, and areas of higher deprivation<sup>55</sup>.  
54  
55  
56 Other studies found no effect modification by neighborhood SES<sup>9 56 65</sup>, sex<sup>64</sup>, maternal  
57  
58  
59  
60

1  
2  
3 education<sup>65</sup>, residential stability/years in residence<sup>56</sup>, race<sup>57</sup>, marital status<sup>57</sup>, city<sup>57</sup>, or household  
4  
5 income.<sup>57</sup>  
6  
7

### 8 9 *Mediation*

10  
11 Three<sup>65 71 72</sup> of seven studies<sup>53 55 62 65 67 71 72</sup> suggested mediation, which is the presence of an  
12  
13 intermediary variable associated with both the exposure and outcome that potentially explains  
14  
15 the causal mechanism linking the two variables (Supplemental Table 4). Traffic-related air  
16  
17 pollution (elemental carbon in residence) mediated associations between school greenness and  
18  
19 working memory and attentiveness in children<sup>65</sup> and self-reported physical activity mediated  
20  
21 associations between greater residential greenness and global cognition in older adults.<sup>71</sup>  
22  
23 Associations between greater neighborhood greenness and better global cognition among  
24  
25 middle-aged adults were mediated by lower waist circumference but not by systolic blood  
26  
27 pressure, total cholesterol, glucose, air pollution (NO<sub>2</sub>), or traffic-related noise.<sup>72</sup> The other four  
28  
29 studies found no mediation of green space-brain health associations by physical activity<sup>53 55 62</sup>,  
30  
31 social measures (e.g., interaction, loneliness)<sup>53</sup>, perceived mental health<sup>62</sup>, traffic noise  
32  
33 annoyance<sup>62</sup>, worry about air pollution<sup>62</sup>, or air pollution levels (i.e., PM<sub>2.5</sub>).<sup>55</sup>  
34  
35  
36  
37  
38

### 39 **Discussion**

40  
41 Evidence was found for associations between green space exposure measured at various life  
42  
43 stages and brain health. Seventy-one percent of NDVI studies (greenness) found positive  
44  
45 associations. Greater neighborhood greenness/green space was positively associated with  
46  
47 multiple cognitive domains, brain regions, and lower odds/risk of AD and non-Alzheimer's  
48  
49 disease dementia. However, some studies found inverse or null associations, few studies were  
50  
51 conducted within each major age group, and the studies employed limited and heterogeneous  
52  
53 methods and definitions. The remainder of this section focuses on the second aim of the  
54  
55 scoping review, which is to identify scientific gaps for future research.  
56  
57  
58  
59  
60

### *Brain health measures*

The diversity of employed brain health measures limits study comparisons. Measures of attention were associated with green space in more than one study<sup>54 62 65</sup>, but additional research is needed to confirm these associations. Studies more frequently assessed executive function, attention, and working memory, and fewer examined short- or long-term memory, language/fluency, processing speed, or visuospatial function. The focus on the former cognitive domains may be due to data availability, but also potential hypothesized underlying mechanisms relating green space and brain health, in which green space exposure restores attention and reduces mental fatigue/stress.<sup>26-28</sup> Nonetheless, green space exposures may be associated with other cognitive measures reflecting brain regions susceptible to green space-related behaviors/exposures. New studies are needed to assess green space associations with cognitive domains commonly affected in typical and atypical AD presentations, including episodic memory<sup>15</sup>, visuospatial processing<sup>74</sup>, and language<sup>75</sup>. These cognitive domains have been associated with physical activity, social engagement, and air pollution exposure<sup>76-78</sup> and are important to investigate in future studies given the plausible mechanisms relating green spaces and these health behaviors/exposures (as detailed in introduction).

Greater greenness/green space displayed mixed associations (positive/inverse) with diagnoses of cognitive impairment or dementia. The mixed findings may be explained by the employed study methods, as three of the four studies were cross-sectional and none examined or controlled for early- and mid-life factors beyond educational attainment. With the onset of health problems or cognitive symptoms, individuals may be more likely to move to greener rural and suburban areas where there are assisted living and nursing care residences. Thus, the associations between greater late-life neighborhood greenness/green space and increased odds/risk of cognitive impairment may be explained by reverse causality/self-selection into greener neighborhoods in later life. Reverse causality will need to be ruled out in future studies

1  
2  
3 by using more sophisticated study designs and methods (e.g., life course, instrumental  
4 variables).  
5  
6  
7

8  
9 Clinical diagnoses may be biased by cultural or education factors that may increase or decrease  
10 the chance of receiving a diagnosis irrespective of disease presence. For instance, minorities  
11 may be more likely to receive dementia diagnoses if educational and cultural differences are  
12 unaccounted for in cognitive testing or if a higher prevalence of comorbidities increases AD/DRD  
13 risk.<sup>79</sup> Nevertheless, diagnoses are clinically significant measures of brain health, particularly  
14 when made by specialists with expertise in discerning the presence and etiology of dementia,  
15 and thus are useful measures for future green space-brain health research in older adults.  
16  
17  
18  
19  
20  
21  
22  
23  
24  
25

26 To date, three studies investigated associations between green space and MRI biomarkers,  
27 specifically regional brain volumes<sup>66</sup>, measures of structural integrity<sup>73</sup>, and measures of cortical  
28 thickness<sup>72</sup> obtained from structural MRI. The study of associated brain regions<sup>66</sup> used an  
29 intensive method of analysis (examining associations for each 3-D pixel [voxel] of brain image)  
30 that significantly limited the number of confounders included in the multivariable analyses. An  
31 alternative to the voxel-wise analysis, which would allow controlling for multiple important  
32 confounders, would be to measure brain health/atrophy using regional brain volumes (mm<sup>3</sup>) and  
33 cortical thickness determined through standardized segmentation techniques.<sup>80</sup> The findings for  
34 associations between greater greenness/green space and greater amygdala integrity and  
35 cortical thickness will need to be replicated. Lastly, measures of global brain atrophy from MRI,  
36 such as total grey matter volume or ventricular volume, may be a useful addition for future  
37 studies under the presumption that green space exposures affect overall brain development and  
38 aging.  
39  
40  
41  
42  
43  
44  
45  
46  
47  
48  
49  
50  
51  
52  
53  
54  
55  
56  
57  
58  
59  
60

### *Green space measures*

This review suggest that NDVI is a valuable measure for future studies of green space and brain health. However, NDVI does not assess tree canopy/cover or other qualities of green spaces (e.g., park amenities). Future work will need to consistently incorporate quality measures including tree canopy/cover, availability of park amenities (e.g., walking trails), and safe walking routes/sidewalks, which will help identify types of green space environments most effective at promoting brain health.

Studies measuring percentage of the neighborhood composed of green space (i.e., parks) found positive, inverse, and null associations, warranting additional studies. Compared to NDVI (greenness), percentage green space may better capture access to green spaces. For instance, associations with NDVI measures can be affected by the chosen cut points to define healthy vegetation (e.g.,  $NDVI > 0.40$  or  $NDVI > 0.60$ ), the satellite image used to derive NDVI (affected by season and cloud cover), or green space fragmentation (pockets) that can skew mean NDVI values. Green space access may be a stronger predictor of healthy behaviors such as physical activity, particularly among socioeconomically disadvantaged individuals with limited resources and opportunities for exercise. Other measures of green space access to should be investigated (e.g., number of neighborhood parks) to determine the strongest predictors of both healthy behaviors and better brain health.

The single study incorporating self-reported measures of green space exposure found no associations.<sup>62</sup> Objective green space measures are necessary to suggest target amounts and qualities of green space for interventions, plans, and policies. However, self-reported and perceived measures may be useful in tandem with objective measures. Valid and reliable green space questionnaires would minimize burden and data security concerns in attempting to derive objective measures from residential addresses across the life span.

1  
2  
3 The majority of studies did not measure actual exposure to green spaces (i.e., time spent in  
4 green spaces). Travel diaries could be used to assess time spent in green spaces, although  
5 compliance in diary completion and misreporting may be an issue.<sup>81</sup> Although studies have  
6 successfully incorporated GPS to investigate neighborhood environmental exposures and  
7 outcomes including physical activity<sup>82-84</sup>, costs, difficulty in recruiting, participant time required,  
8 and non-compliance can be a hurdle.<sup>85</sup> Despite these limitations, GPS and travel diary  
9 measures of time spent in green space provide increased specificity of exposure needed to  
10 make informed decisions about green space-brain health associations. If individuals live in  
11 neighborhoods with greater access to green space but they do not regularly spend time in those  
12 spaces, then associations with brain health observed in prior research have been spurious or  
13 biased by residual confounding.  
14  
15  
16  
17  
18  
19  
20  
21  
22  
23  
24  
25  
26  
27

28 Places for estimating green space exposures may depend on the age group under study, but  
29 only two studies measured non-residential exposures.<sup>64 65</sup> Green space exposure may occur  
30 most frequently in residential and school environments among children; residential, working,  
31 and recreational environments among working adults; and residential and recreational  
32 environments among older adults. Future studies will benefit from a more comprehensive  
33 assesment of places for green space exposures, and longitudinal studies following individuals  
34 progressing through these life stages should keep age-based differences in activity spaces in  
35 mind.  
36  
37  
38  
39  
40  
41  
42  
43  
44  
45  
46

#### 47 *Life course exposures*

48 Many of the studies of middle- and older-aged adults were cross-sectional<sup>9 53 57-59 61 62 69 71-73</sup> and  
49 lacked consideration of earlier life green space exposures.<sup>9 53 55 57-62 69 71-73</sup> Childhood exposures  
50 may be most critical for determining late-life brain health by influencing healthy brain  
51 development. These neurodevelopmental benefits may impart cognitive reserve and resilience  
52  
53  
54  
55  
56  
57  
58  
59  
60

1  
2  
3 through older ages, which protects against ADRD neuropathology and resists symptoms despite  
4 neuropathology.<sup>86</sup> Green space exposure patterns during childhood may also establish healthy  
5 habits including physical activity that continue through adulthood to boost and maintain brain  
6 health. The importance of including childhood measures in future studies also applies to  
7 confounders such as early-life personal and neighborhood SES, which have been found to be  
8 associated with late-life cognitive health.<sup>87</sup>  
9  
10  
11  
12  
13  
14

15  
16  
17  
18 Some evidence suggests that mid-life behaviors may be stronger predictors of late-life cognitive  
19 decline and dementia risk than late-life behaviors.<sup>88 89</sup> In a similar fashion, green space  
20 exposures in mid-life versus late-life may be more strongly associated with late-life brain health.  
21 Mid-life exposures are of particular interest because the neuropathology associated with ADRD  
22 often starts decades prior to symptom development (i.e., in mid-life).<sup>90</sup> During mid-life, green  
23 space-related behaviors/exposures such as physical activity may help resist the development of  
24 ADRD neuropathology or decrease the neuropathological burden.<sup>91</sup> Yet, even late-life green  
25 space exposures may help maintain brain health in older age by providing accessible places  
26 that encourage exercise, relaxation, and socializing. Life course studies are needed to  
27 determine the critical periods of green space exposure related to late-life brain health and  
28 ADRD risk.  
29  
30  
31  
32  
33  
34  
35  
36  
37  
38  
39  
40  
41  
42

### 43 *Causal mechanisms*

44  
45 Traffic-related air pollution and self-reported physical activity were found to be mediators,  
46 providing preliminary evidence for these two causal mechanisms. Future evaluation of  
47 mediation by physical activity should use rigorous, objective measures such as those obtained  
48 from accelerometers. Social engagement and related measures were not found to be mediators,  
49 and mental health (e.g., anxiety, depression) and immune function were not examined in any  
50 study. Altogether, few studies examined mediation, additional work is need to determine causal  
51  
52  
53  
54  
55  
56  
57  
58  
59  
60

1  
2  
3 pathways for green space-brain health associations, and future studies will need to employ  
4 rigorous methods to evaluate mediation.<sup>92</sup>  
5  
6  
7

### 8 9 *Future research directions*

10  
11 New studies will need to incorporate longitudinal measures of green space (accumulation of  
12 exposures and changes over time) and brain health. GPS-based measures of green activity  
13 spaces and time spent in green spaces will improve the quantification and quality assessment of  
14 green space exposures. Use of brain biomarkers such as structural and functional MRI, PET  
15 scans, and CSF biomarkers to detect brain neurodegeneration/ADRD may provide biological  
16 evidence for associations. Green space exposures should temporally precede the brain health  
17 measures, and the validity and reliability of green space measures need to be established.  
18  
19

20 Causal mechanisms need to be delineated through rigorous investigation of potential mediators.  
21 In addition, the evidence base will be strengthened by capitalizing on natural experiments (e.g.,  
22 planned green space additions) to study green space associations with brain health.  
23  
24  
25

26  
27 Future studies will need to incorporate relevant factors insufficiently examined to date, including  
28 the potential impact of residential moves, seasonality of exposure/regional climate, bias due to  
29 self-selection into greener neighborhoods (i.e., reverse causality), and neighborhood-level  
30 confounders (e.g., crime, population density). Research is needed on the pertinent places (e.g.,  
31 neighborhood, work, recreational) and boundaries (e.g., 1,000m buffer) for green space  
32 exposures. Studies need to determine if associations are present irrespective of or instead  
33 depend on race/ethnicity and culture, by demonstrating associations in multiple international  
34 contexts and in various regions of diverse countries such as the US.  
35  
36  
37  
38  
39  
40  
41  
42  
43  
44  
45  
46  
47  
48  
49  
50  
51  
52  
53  
54  
55  
56  
57  
58  
59  
60



### *Limitations*

Limitations of the reviewed studies include lack of consideration of early-life green space exposures and examination of actual time spent in green spaces. Thus, the studies were likely affected by misclassification/information bias. Selection bias was also likely for many of the studies that restricted to samples with non-missing data on exposures and outcomes.

This review may be limited by positive publication bias. In addition, papers may have been missed due to the nature of this rapid review, which was based on three databases, a restricted review of the Web of Science search results (detailed in methods and Supplemental Figure 1), and a single reviewer. However, the review of reference lists and related reviews helped reduce the possibility. As this was a rapid review with scoping aims<sup>47 49 51 52</sup>, it was never intended to systematically evaluate the evidence for risk of bias, which will be reserved for future systematic reviews.

### *Conclusion*

This rapid review identified twenty-two studies of green space and brain health. The majority of studies were cross-sectional and the green space and brain health measures were heterogeneous. Despite the limitations, multiple studies investigating neighborhood greenness found positive associations with brain health outcomes at various life stages. Thus, the evidence is suggestive that green space is associated with brain health and future systematic reviews are warranted. The observed positive associations need to be replicated in longitudinal and life course studies of diverse cohorts and in studies using more rigorous measurements and statistical methods. These improvements are needed to build a case for community-level green space interventions to impart brain resilience, maintain/improve cognition, and reduce AD/DRD risk in late life.

## References

1. Frumkin H, Bratman GN, Breslow SJ, et al. Nature Contact and Human Health: A Research Agenda. *Environ Health Perspect* 2017;125(7):075001. doi: 10.1289/EHP1663 [published Online First: 2017/08/11]
2. Hartig T, Mitchell R, de Vries S, et al. Nature and health. *Annu Rev Public Health* 2014;35:207-28. doi: 10.1146/annurev-publhealth-032013-182443 [published Online First: 2014/01/07]
3. Twohig-Bennett C, Jones A. The health benefits of the great outdoors: A systematic review and meta-analysis of greenspace exposure and health outcomes. *Environ Res* 2018;166:628-37. doi: 10.1016/j.envres.2018.06.030 [published Online First: 2018/07/10]
4. Gascon M, Triguero-Mas M, Martinez D, et al. Residential green spaces and mortality: A systematic review. *Environ Int* 2016;86:60-7. doi: 10.1016/j.envint.2015.10.013 [published Online First: 2015/11/06]
5. de Keijzer C, Gascon M, Nieuwenhuijsen MJ, et al. Long-Term Green Space Exposure and Cognition Across the Life Course: a Systematic Review. *Curr Environ Health Rep* 2016;3(4):468-77. doi: 10.1007/s40572-016-0116-x [published Online First: 2016/10/13]
6. Fong KC, Hart JE, James P. A Review of Epidemiologic Studies on Greenness and Health: Updated Literature Through 2017. *Curr Environ Health Rep* 2018;5(1):77-87. doi: 10.1007/s40572-018-0179-y [published Online First: 2018/02/03]
7. Vanaken GJ, Danckaerts M. Impact of Green Space Exposure on Children's and Adolescents' Mental Health: A Systematic Review. *Int J Environ Res Public Health* 2018;15(12) doi: 10.3390/ijerph15122668 [published Online First: 2018/11/30]
8. Hankey S, Marshall JD. Urban Form, Air Pollution, and Health. *Curr Environ Health Rep* 2017;4(4):491-503. doi: 10.1007/s40572-017-0167-7 [published Online First: 2017/10/21]

- 1  
2  
3 9. Brown SC, Perrino T, Lombard J, et al. Health Disparities in the Relationship of  
4  
5 Neighborhood Greenness to Mental Health Outcomes in 249,405 U.S. Medicare  
6  
7 Beneficiaries. *Int J Environ Res Public Health* 2018;15(3) doi: 10.3390/ijerph15030430  
8  
9 [published Online First: 2018/03/02]  
10
- 11 10. Roberts R, Knopman DS. Classification and epidemiology of MCI. *Clin Geriatr Med*  
12  
13 2013;29(4):753-72. doi: 10.1016/j.cger.2013.07.003 [published Online First: 2013/10/08]  
14  
15
- 16 11. World Health Organization. Dementia [Available from: [https://www.who.int/news-room/fact-](https://www.who.int/news-room/fact-sheets/detail/dementia)  
17  
18 sheets/detail/dementia accessed 2/10/2020].  
19
- 20 12. Baumgart M, Snyder HM, Carrillo MC, et al. Summary of the evidence on modifiable risk  
21  
22 factors for cognitive decline and dementia: A population-based perspective. *Alzheimers*  
23  
24 *Dement* 2015;11(6):718-26. doi: 10.1016/j.jalz.2015.05.016 [published Online First:  
25  
26 2015/06/06]  
27
- 28 13. Jack CR, Jr., Bennett DA, Blennow K, et al. NIA-AA Research Framework: Toward a  
29  
30 biological definition of Alzheimer's disease. *Alzheimers Dement* 2018;14(4):535-62. doi:  
31  
32 10.1016/j.jalz.2018.02.018 [published Online First: 2018/04/15]  
33  
34
- 35 14. Montine TJ, Monsell SE, Beach TG, et al. Multisite assessment of NIA-AA guidelines for the  
36  
37 neuropathologic evaluation of Alzheimer's disease. *Alzheimers Dement* 2016;12(2):164-  
38  
39 69. doi: 10.1016/j.jalz.2015.07.492 [published Online First: 2015/08/29]  
40
- 41 15. Hugo J, Ganguli M. Dementia and cognitive impairment: epidemiology, diagnosis, and  
42  
43 treatment. *Clin Geriatr Med* 2014;30(3):421-42. doi: 10.1016/j.cger.2014.04.001  
44  
45 [published Online First: 2014/07/20]  
46
- 47 16. Apostolova LG, Green AE, Babakchanian S, et al. Hippocampal atrophy and ventricular  
48  
49 enlargement in normal aging, mild cognitive impairment (MCI), and Alzheimer Disease.  
50  
51 *Alzheimer Dis Assoc Disord* 2012;26(1):17-27. doi: 10.1097/WAD.0b013e3182163b62  
52  
53 [published Online First: 2012/02/22]  
54  
55  
56  
57  
58  
59  
60

- 1  
2  
3 17. Liu S, Liu J, Wang XD, et al. Caregiver burden, sleep quality, depression, and anxiety in  
4 dementia caregivers: a comparison of frontotemporal lobar degeneration, dementia with  
5 Lewy bodies, and Alzheimer's disease. *Int Psychogeriatr* 2017;1-8. doi:  
6  
7 10.1017/S1041610217002630 [published Online First: 2017/12/11]  
8  
9
- 10  
11 18. Galvin JE, Howard DH, Denny SS, et al. The social and economic burden of frontotemporal  
12 degeneration. *Neurology* 2017;89(20):2049-56. doi: 10.1212/WNL.0000000000004614  
13  
14 [published Online First: 2017/10/06]  
15  
16
- 17  
18 19. Alzheimer's Association. 2020 Alzheimer's Disease Facts and Figures 2020 [Available from:  
19  
20 <https://www.alz.org/media/Documents/alzheimers-facts-and-figures.pdf> accessed  
21  
22 05/08/2020.  
23
- 24  
25 20. Markevych I, Schoierer J, Hartig T, et al. Exploring pathways linking greenspace to health:  
26 Theoretical and methodological guidance. *Environ Res* 2017;158:301-17. doi:  
27  
28 10.1016/j.envres.2017.06.028 [published Online First: 2017/07/04]  
29
- 30  
31 21. Erickson KI, Voss MW, Prakash RS, et al. Exercise training increases size of hippocampus  
32 and improves memory. *Proc Natl Acad Sci U S A* 2011;108(7):3017-22. doi:  
33  
34 10.1073/pnas.1015950108 [published Online First: 2011/02/02]  
35  
36
- 37  
38 22. Fleischman DA, Yang J, Arfanakis K, et al. Physical activity, motor function, and white  
39 matter hyperintensity burden in healthy older adults. *Neurology* 2015;84(13):1294-300.  
40  
41 doi: 10.1212/WNL.0000000000001417 [published Online First: 2015/03/13]  
42
- 43  
44 23. Vivar C, Potter MC, van Praag H. All about running: synaptic plasticity, growth factors and  
45 adult hippocampal neurogenesis. *Curr Top Behav Neurosci* 2013;15:189-210. doi:  
46  
47 10.1007/7854\_2012\_220 [published Online First: 2012/08/01]  
48
- 49  
50 24. van Tol MJ, van der Wee NJ, van den Heuvel OA, et al. Regional brain volume in  
51 depression and anxiety disorders. *Arch Gen Psychiatry* 2010;67(10):1002-11. doi:  
52  
53 10.1001/archgenpsychiatry.2010.121 [published Online First: 2010/10/06]  
54  
55  
56  
57  
58  
59

- 1  
2  
3 25. Wilker EH, Preis SR, Beiser AS, et al. Long-term exposure to fine particulate matter,  
4 residential proximity to major roads and measures of brain structure. *Stroke*  
5 2015;46(5):1161-6. doi: 10.1161/STROKEAHA.114.008348 [published Online First:  
6 2015/04/25]  
7  
8  
9  
10  
11 26. Berto R. The role of nature in coping with psycho-physiological stress: a literature review on  
12 restorativeness. *Behav Sci (Basel)* 2014;4(4):394-409. doi: 10.3390/bs4040394  
13 [published Online First: 2014/11/29]  
14  
15  
16  
17 27. Stevenson MP, Schilhab T, Bentsen P. Attention Restoration Theory II: a systematic review  
18 to clarify attention processes affected by exposure to natural environments. *J Toxicol*  
19 *Environ Health B Crit Rev* 2018;21(4):227-68. doi: 10.1080/10937404.2018.1505571  
20 [published Online First: 2018/08/22]  
21  
22  
23  
24  
25 28. Pasanen T, Johnson K, Lee K, et al. Can Nature Walks With Psychological Tasks Improve  
26 Mood, Self-Reported Restoration, and Sustained Attention? Results From Two  
27 Experimental Field Studies. *Front Psychol* 2018;9:2057. doi: 10.3389/fpsyg.2018.02057  
28 [published Online First: 2018/11/15]  
29  
30  
31  
32  
33 29. Stigsdotter UK, Ekholm O, Schipperijn J, et al. Health promoting outdoor environments--  
34 associations between green space, and health, health-related quality of life and stress  
35 based on a Danish national representative survey. *Scand J Public Health*  
36 2010;38(4):411-7. doi: 10.1177/1403494810367468 [published Online First: 2010/04/24]  
37  
38  
39  
40  
41  
42 30. Van Den Berg AE, Custers MH. Gardening promotes neuroendocrine and affective  
43 restoration from stress. *J Health Psychol* 2011;16(1):3-11. doi:  
44 10.1177/1359105310365577 [published Online First: 2010/06/05]  
45  
46  
47  
48  
49 31. Kessing LV. Depression and the risk for dementia. *Curr Opin Psychiatry* 2012;25(6):457-61.  
50 doi: 10.1097/YCO.0b013e328356c368 [published Online First: 2012/07/18]  
51  
52  
53  
54  
55  
56  
57  
58  
59  
60

- 1  
2  
3 32. Ruokolainen L, von Hertzen L, Fyhrquist N, et al. Green areas around homes reduce atopic  
4 sensitization in children. *Allergy* 2015;70(2):195-202. doi: 10.1111/all.12545 [published  
5 Online First: 2014/11/13]  
6  
7  
8  
9 33. Sun M, Ma K, Wen J, et al. A Review of the Brain-Gut-Microbiome Axis and the Potential  
10 Role of Microbiota in Alzheimer's Disease. *J Alzheimers Dis* 2020;73(3):849-65. doi:  
11 10.3233/JAD-190872 [published Online First: 2019/12/31]  
12  
13  
14 34. Nielsen CC, Gascon M, Osornio-Vargas AR, et al. Natural environments in the urban  
15 context and gut microbiota in infants. *Environ Int* 2020;142:105881. doi:  
16 10.1016/j.envint.2020.105881 [published Online First: 2020/07/02]  
17  
18  
19 35. Logan AC. Dysbiotic drift: mental health, environmental grey space, and microbiota. *J*  
20 *Physiol Anthropol* 2015;34:23. doi: 10.1186/s40101-015-0061-7 [published Online First:  
21 2015/05/08]  
22  
23  
24 36. Dalton AM, Wareham N, Griffin S, et al. Neighbourhood greenspace is associated with a  
25 slower decline in physical activity in older adults: A prospective cohort study. *SSM Popul*  
26 *Health* 2016;2:683-91. doi: 10.1016/j.ssmph.2016.09.006 [published Online First:  
27 2016/12/27]  
28  
29  
30 37. Bancroft C, Joshi S, Rundle A, et al. Association of proximity and density of parks and  
31 objectively measured physical activity in the United States: A systematic review. *Soc Sci*  
32 *Med* 2015;138:22-30. doi: 10.1016/j.socscimed.2015.05.034 [published Online First:  
33 2015/06/05]  
34  
35  
36 38. Tan ZS, Spartano NL, Beiser AS, et al. Physical Activity, Brain Volume, and Dementia Risk:  
37 The Framingham Study. *J Gerontol A Biol Sci Med Sci* 2017;72(6):789-95. doi:  
38 10.1093/gerona/glw130 [published Online First: 2016/07/17]  
39  
40  
41 39. Kirk-Sanchez NJ, McGough EL. Physical exercise and cognitive performance in the elderly:  
42 current perspectives. *Clin Interv Aging* 2014;9:51-62. doi: 10.2147/CIA.S39506  
43 [published Online First: 2014/01/01]  
44  
45  
46  
47  
48  
49  
50  
51  
52  
53  
54  
55  
56  
57  
58  
59  
60

- 1  
2  
3 40. Jennings V, Bamkole O. The Relationship between Social Cohesion and Urban Green  
4  
5 Space: An Avenue for Health Promotion. *Int J Environ Res Public Health* 2019;16(3) doi:  
6  
7 10.3390/ijerph16030452 [published Online First: 2019/02/06]  
8  
9 41. Krueger KR, Wilson RS, Kamenetsky JM, et al. Social engagement and cognitive function in  
10  
11 old age. *Exp Aging Res* 2009;35(1):45-60. doi: 10.1080/03610730802545028  
12  
13 42. Marioni RE, Proust-Lima C, Amieva H, et al. Social activity, cognitive decline and dementia  
14  
15 risk: a 20-year prospective cohort study. *BMC Public Health* 2015;15:1089. doi:  
16  
17 10.1186/s12889-015-2426-6 [published Online First: 2015/10/27]  
18  
19 43. Midouhas E, Kokosi T, Flouri E. Neighbourhood-level air pollution and greenspace and  
20  
21 inflammation in adults. *Health Place* 2019;58:102167. doi:  
22  
23 10.1016/j.healthplace.2019.102167 [published Online First: 2019/07/22]  
24  
25 44. Datzmann T, Markevych I, Trautmann F, et al. Outdoor air pollution, green space, and  
26  
27 cancer incidence in Saxony: a semi-individual cohort study. *BMC Public Health*  
28  
29 2018;18(1):715. doi: 10.1186/s12889-018-5615-2 [published Online First: 2018/06/10]  
30  
31 45. Peters R, Ee N, Peters J, et al. Air Pollution and Dementia: A Systematic Review. *J*  
32  
33 *Alzheimers Dis* 2019 doi: 10.3233/JAD-180631 [published Online First: 2019/02/19]  
34  
35 46. Block ML, Calderon-Garciduenas L. Air pollution: mechanisms of neuroinflammation and  
36  
37 CNS disease. *Trends Neurosci* 2009;32(9):506-16. doi: 10.1016/j.tins.2009.05.009  
38  
39 [published Online First: 2009/09/01]  
40  
41 47. Grant MJ, Booth A. A typology of reviews: an analysis of 14 review types and associated  
42  
43 methodologies. *Health Info Libr J* 2009;26(2):91-108. doi: 10.1111/j.1471-  
44  
45 1842.2009.00848.x [published Online First: 2009/06/06]  
46  
47 48. Arksey H, O'Malley L. Scoping studies: towards a methodological framework. *International*  
48  
49 *Journal of Social Research Methodology* 2005;8(1):19-32.  
50  
51  
52  
53  
54  
55  
56  
57  
58  
59  
60

- 1  
2  
3 49. Peters MD, Godfrey CM, Khalil H, et al. Guidance for conducting systematic scoping  
4  
5 reviews. *Int J Evid Based Healthc* 2015;13(3):141-6. doi:  
6  
7 10.1097/XEB.0000000000000050 [published Online First: 2015/07/03]  
8  
9  
10 50. Zhang JG, Yu ZW, Zhao B, et al. Links between green space and public health: a  
11  
12 bibliometric review of global research trends and future prospects from 1901 to 2019.  
13  
14 *Environ Res Lett* 2020;15(6) doi: ARTN 063001  
15  
16 10.1088/1748-9326/ab7f64  
17  
18 51. Munn Z, Peters MDJ, Stern C, et al. Systematic review or scoping review? Guidance for  
19  
20 authors when choosing between a systematic or scoping review approach. *BMC Med*  
21  
22 *Res Methodol* 2018;18(1):143. doi: 10.1186/s12874-018-0611-x [published Online First:  
23  
24 2018/11/21]  
25  
26 52. Tricco AC, Antony J, Zarin W, et al. A scoping review of rapid review methods. *BMC Med*  
27  
28 2015;13:224. doi: 10.1186/s12916-015-0465-6 [published Online First: 2015/09/18]  
29  
30 53. Clarke PJ, Ailshire JA, House JS, et al. Cognitive function in the community setting: the  
31  
32 neighbourhood as a source of 'cognitive reserve'? *J Epidemiol Community Health*  
33  
34 2012;66(8):730-6. doi: 10.1136/jech.2010.128116  
35  
36 54. Dadvand P, Tischer C, Estarlich M, et al. Lifelong Residential Exposure to Green Space and  
37  
38 Attention: A Population-based Prospective Study. *Environ Health Perspect*  
39  
40 2017;125(9):097016. doi: 10.1289/EHP694 [published Online First: 2017/09/22]  
41  
42 55. de Keijzer C, Tonne C, Basagana X, et al. Residential Surrounding Greenness and  
43  
44 Cognitive Decline: A 10-Year Follow-up of the Whitehall II Cohort. *Environ Health*  
45  
46 *Perspect* 2018;126(7):077003. doi: 10.1289/EHP2875 [published Online First:  
47  
48 2018/07/22]  
49  
50 56. Flouri E, Papachristou E, Midouhas E. The role of neighbourhood greenspace in children's  
51  
52 spatial working memory. *Br J Educ Psychol* 2019;89(2):359-73. doi: 10.1111/bjep.12243  
53  
54 [published Online First: 2018/09/07]  
55  
56  
57  
58  
59  
60



- 1  
2  
3 57. Hystad P PY, Noisel N, Boileau C. Green space associations with mental health and  
4  
5 cognitive function: Results from the Quebec CARTaGENE cohort. *Environmental*  
6  
7 *Epidemiology* 2019;3:e040.  
8
- 9 58. Wu YT, Prina AM, Jones A, et al. The Built Environment and Cognitive Disorders: Results  
10  
11 From the Cognitive Function and Ageing Study II. *Am J Prev Med* 2017 doi:  
12  
13 10.1016/j.amepre.2016.11.020 [published Online First: 2017/01/09]  
14  
15
- 16 59. Wu YT, Prina AM, Jones AP, et al. Community environment, cognitive impairment and  
17  
18 dementia in later life: results from the Cognitive Function and Ageing Study. *Age Ageing*  
19  
20 2015;44(6):1005-11. doi: 10.1093/ageing/afv137 [published Online First: 2015/10/16]  
21  
22
- 23 60. Yuchi W, Sbihi H, Davies H, et al. Road proximity, air pollution, noise, green space and  
24  
25 neurologic disease incidence: a population-based cohort study. *Environ Health*  
26  
27 2020;19(1):8. doi: 10.1186/s12940-020-0565-4 [published Online First: 2020/01/23]  
28  
29
- 30 61. Zhu A, Yan L, Shu C, et al. APOE epsilon4 Modifies Effect of Residential Greenness on  
31  
32 Cognitive Function among Older Adults: A Longitudinal Analysis in China. *Sci Rep*  
33  
34 2020;10(1):82. doi: 10.1038/s41598-019-57082-7 [published Online First: 2020/01/11]  
35  
36
- 37 62. Zijlema WL, Triguero-Mas M, Smith G, et al. The relationship between natural outdoor  
38  
39 environments and cognitive functioning and its mediators. *Environmental research*  
40  
41 2017;155:268-75. doi: 10.1016/j.envres.2017.02.017 [published Online First:  
42  
43 2017/03/04]  
44  
45
- 46 63. Cherrie MPC, Shortt NK, Mitchell RJ, et al. Green space and cognitive ageing: A  
47  
48 retrospective life course analysis in the Lothian Birth Cohort 1936. *Soc Sci Med*  
49  
50 2018;196:56-65. doi: 10.1016/j.socscimed.2017.10.038 [published Online First:  
51  
52 2017/11/13]  
53  
54
- 55 64. Cherrie MPC, Shortt NK, Ward Thompson C, et al. Association Between the Activity Space  
56  
57 Exposure to Parks in Childhood and Adolescence and Cognitive Aging in Later Life. *Int J*  
58  
59  
60

- 1  
2  
3 *Environ Res Public Health* 2019;16(4) doi: 10.3390/ijerph16040632 [published Online  
4  
5 First: 2019/02/24]  
6
- 7 65. Dadvand P, Nieuwenhuijsen MJ, Esnaola M, et al. Green spaces and cognitive development  
8  
9 in primary schoolchildren. *Proceedings of the National Academy of Sciences of the*  
10  
11 *United States of America* 2015;112(26):7937-42. doi: 10.1073/pnas.1503402112  
12  
13 [published Online First: 2015/06/17]  
14
- 15 66. Dadvand P, Pujol J, Macia D, et al. The Association between Lifelong Greenspace  
16  
17 Exposure and 3-Dimensional Brain Magnetic Resonance Imaging in Barcelona  
18  
19 Schoolchildren. *Environ Health Perspect* 2018;126(2):027012. doi: 10.1289/EHP1876  
20  
21 [published Online First: 2018/03/06]  
22  
23
- 24 67. Liao J, Zhang B, Xia W, et al. Residential exposure to green space and early childhood  
25  
26 neurodevelopment. *Environ Int* 2019;128:70-76. doi: 10.1016/j.envint.2019.03.070  
27  
28 [published Online First: 2019/04/29]  
29
- 30 68. Reuben A, Arseneault L, Belsky DW, et al. Residential neighborhood greenery and  
31  
32 children's cognitive development. *Soc Sci Med* 2019;230:271-79. doi:  
33  
34 10.1016/j.socscimed.2019.04.029 [published Online First: 2019/04/30]  
35  
36
- 37 69. Wang D, Lau KK, Yu R, et al. Neighbouring green space and mortality in community-  
38  
39 dwelling elderly Hong Kong Chinese: a cohort study. *BMJ open* 2017;7(7):e015794. doi:  
40  
41 10.1136/bmjopen-2016-015794 [published Online First: 2017/08/03]  
42
- 43 70. Ward JS, Duncan JS, Jarden A, et al. The impact of children's exposure to greenspace on  
44  
45 physical activity, cognitive development, emotional wellbeing, and ability to appraise risk.  
46  
47 *Health Place* 2016;40:44-50. doi: 10.1016/j.healthplace.2016.04.015 [published Online  
48  
49 First: 2016/05/15]  
50
- 51 71. Yu R, Wang D, Leung J, et al. Is Neighborhood Green Space Associated With Less Frailty?  
52  
53 Evidence From the Mr. and Ms. Os (Hong Kong) Study. *Journal of the American Medical*  
54  
55  
56  
57  
58  
59  
60

- 1  
2  
3 *Directors Association* 2018;19(6):528-34. doi: 10.1016/j.jamda.2017.12.015 [published  
4  
5 Online First: 2018/02/07]  
6
- 7 72. Dzhambov AM, Bahchevanov KM, Chompalov KA, et al. A feasibility study on the  
8  
9 association between residential greenness and neurocognitive function in middle-aged  
10  
11 Bulgarians. *Arhiv Za Higijenu Rada I Toksikologiju-Archives of Industrial Hygiene and*  
12  
13 *Toxicology* 2019;70(3):173-85. doi: 10.2478/aiht-2019-70-3326  
14  
15
- 16 73. Kuhn S, Duzel S, Eibich P, et al. In search of features that constitute an "enriched  
17  
18 environment" in humans: Associations between geographical properties and brain  
19  
20 structure. *Scientific reports* 2017;7 doi: ARTN 11920  
21  
22 10.1038/s41598-017-12046-7  
23
- 24 74. Wong B, Lucente DE, MacLean J, et al. Diagnostic evaluation and monitoring of patients  
25  
26 with posterior cortical atrophy. *Neurodegener Dis Manag* 2019;9(4):217-39. doi:  
27  
28 10.2217/nmt-2018-0052 [published Online First: 2019/08/09]  
29
- 30 75. Rogalski E, Sridhar J, Rader B, et al. Aphasic variant of Alzheimer disease: Clinical,  
31  
32 anatomic, and genetic features. *Neurology* 2016;87(13):1337-43. doi:  
33  
34 10.1212/WNL.0000000000003165 [published Online First: 2016/08/28]  
35  
36
- 37 76. Krell-Roesch J, Vemuri P, Pink A, et al. Association Between Mentally Stimulating Activities  
38  
39 in Late Life and the Outcome of Incident Mild Cognitive Impairment, With an Analysis of  
40  
41 the APOE epsilon4 Genotype. *JAMA Neurol* 2017;74(3):332-38. doi:  
42  
43 10.1001/jamaneurol.2016.3822 [published Online First: 2017/01/31]  
44
- 45 77. Cleary EG, Cifuentes M, Grinstein G, et al. Association of Low-Level Ozone with Cognitive  
46  
47 Decline in Older Adults. *J Alzheimers Dis* 2018;61(1):67-78. doi: 10.3233/JAD-170658  
48  
49 [published Online First: 2017/11/06]  
50
- 51 78. Podewils LJ, Guallar E, Kuller LH, et al. Physical activity, APOE genotype, and dementia  
52  
53 risk: findings from the Cardiovascular Health Cognition Study. *Am J Epidemiol*  
54  
55 2005;161(7):639-51. doi: 10.1093/aje/kwi092 [published Online First: 2005/03/23]  
56  
57  
58  
59

- 1  
2  
3 79. Chin AL, Negash S, Hamilton R. Diversity and disparity in dementia: the impact of  
4  
5 ethnoracial differences in Alzheimer disease. *Alzheimer Dis Assoc Disord*  
6  
7 2011;25(3):187-95. doi: 10.1097/WAD.0b013e318211c6c9 [published Online First:  
8  
9 2011/03/15]  
10  
11 80. Ledig C, Schuh A, Guerrero R, et al. Structural brain imaging in Alzheimer's disease and  
12  
13 mild cognitive impairment: biomarker analysis and shared morphometry database. *Sci*  
14  
15 *Rep* 2018;8(1):11258. doi: 10.1038/s41598-018-29295-9 [published Online First:  
16  
17 2018/07/28]  
18  
19 81. Frost R, McClurg D, Brady M, et al. Optimising the validity and completion of adherence  
20  
21 diaries: a multiple case study and randomised crossover trial. *Trials* 2016;17(1):489. doi:  
22  
23 10.1186/s13063-016-1615-7 [published Online First: 2016/10/12]  
24  
25 82. Evenson KR, Wen F, Hillier A, et al. Assessing the contribution of parks to physical activity  
26  
27 using global positioning system and accelerometry. *Med Sci Sports Exerc*  
28  
29 2013;45(10):1981-7. doi: 10.1249/MSS.0b013e318293330e [published Online First:  
30  
31 2013/03/28]  
32  
33 83. Hirsch JA, Winters M, Clarke P, et al. Generating GPS activity spaces that shed light upon  
34  
35 the mobility habits of older adults: a descriptive analysis. *International Journal of Health*  
36  
37 *Geographics* 2014;13 doi: 10.1186/1476-072x-13-51  
38  
39 84. James P, Hart JE, Hipp JA, et al. GPS-Based Exposure to Greenness and Walkability and  
40  
41 Accelerometry-Based Physical Activity. *Cancer Epidemiol Biomarkers Prev*  
42  
43 2017;26(4):525-32. doi: 10.1158/1055-9965.EPI-16-0925 [published Online First:  
44  
45 2017/02/16]  
46  
47 85. Zenk SN, Matthews SA, Kraft AN, et al. How many days of global positioning system (GPS)  
48  
49 monitoring do you need to measure activity space environments in health research?  
50  
51 *Health Place* 2018;51:52-60. doi: 10.1016/j.healthplace.2018.02.004 [published Online  
52  
53 First: 2018/03/20]  
54  
55  
56  
57  
58  
59  
60

- 1  
2  
3 86. Montine TJ, Cholerton BA, Corrada MM, et al. Concepts for brain aging: resistance,  
4  
5 resilience, reserve, and compensation. *Alzheimers Res Ther* 2019;11(1):22. doi:  
6  
7 10.1186/s13195-019-0479-y [published Online First: 2019/03/13]  
8  
9  
10 87. Letellier N, Gutierrez LA, Carriere I, et al. Sex-specific association between neighborhood  
11  
12 characteristics and dementia: The Three-City cohort. *Alzheimers Dement*  
13  
14 2018;14(4):473-82. doi: 10.1016/j.jalz.2017.09.015 [published Online First: 2017/11/06]  
15  
16 88. Anstey KJ, Cherbuin N, Budge M, et al. Body mass index in midlife and late-life as a risk  
17  
18 factor for dementia: a meta-analysis of prospective studies. *Obes Rev* 2011;12(5):e426-  
19  
20 37. doi: 10.1111/j.1467-789X.2010.00825.x [published Online First: 2011/02/26]  
21  
22 89. Joas E, Bäckman K, Gustafson D, et al. Blood pressure trajectories from midlife to late life in  
23  
24 relation to dementia in women followed for 37 years. *Hypertension* 2012;59(4):796-801.  
25  
26 doi: 10.1161/hypertensionaha.111.182204  
27  
28 90. Irwin K, Sexton C, Daniel T, et al. Healthy Aging and Dementia: Two Roads Diverging in  
29  
30 Midlife? *Front Aging Neurosci* 2018;10:275. doi: 10.3389/fnagi.2018.00275 [published  
31  
32 Online First: 2018/10/05]  
33  
34 91. Brown BM, Peiffer J, Rainey-Smith SR. Exploring the relationship between physical activity,  
35  
36 beta-amyloid and tau: A narrative review. *Ageing Res Rev* 2019;50:9-18. doi:  
37  
38 10.1016/j.arr.2019.01.003 [published Online First: 2019/01/08]  
39  
40  
41 92. Dzhambov AM, Browning MHEM, Markevych I, et al. Analytical approaches to testing  
42  
43 pathways linking greenspace to health: A scoping review of the empirical literature.  
44  
45 *Environmental Research* 2020;186 doi: ARTN 109613  
46  
47 10.1016/j.envres.2020.109613  
48  
49  
50  
51  
52  
53  
54  
55  
56  
57  
58  
59  
60

## Figure titles and captions

### Figure 1

Title: Sample size flow diagram

Caption: See Supplemental Figure 1 for full details.

### Figure 2

Title: Number of studies by country

Caption: Abbreviations: UK = United Kingdom, US = United States

### Figure 3

Title: Number of studies by age group

Caption: Abbreviation: Yrs = years

### Figure 4

Title: Number of studies by green space-brain health association

Caption: Abbreviations/definitions: Cog = cognition; MRI = magnetic resonance imaging; Dx = diagnosis of cognitive impairment/dementia; Greenness = measure of greenness such as Normalized Difference Vegetation Index, % Green space = Percent or amount of neighborhood composed of green space/park space; Other green space = time spent in green space, distance to nearest green/park space, and/or self-reported measures

Table 1. Summary of green space-brain health associations by age group

| Citation <sup>a</sup> | Sample size | Population based/<br>random sample | Location                  | Children<br>(<18 years) | Adults<br>(18-64 years) | Older adults<br>(≥65 years) |
|-----------------------|-------------|------------------------------------|---------------------------|-------------------------|-------------------------|-----------------------------|
| Brown (2018)          | 249,405     | Yes                                | US                        |                         |                         | +                           |
| Cherrie (2018)        | 281         | Yes                                | UK                        | N                       | N                       | +                           |
| Cherrie (2019)        | 281         | Yes                                | UK                        |                         |                         | + N                         |
| Clarke (2012)         | 949         | Yes                                | US                        |                         | N                       | N                           |
| Dadvand (2015)        | 2,593       | No                                 | Spain                     | + N                     |                         |                             |
| Dadvand (2017)        | 987         | Yes                                | Spain                     | + N                     |                         |                             |
| Dadvand (2018)        | 253         | No                                 | Spain                     | + N                     |                         |                             |
| Dzhambov (2019)       | 112         | No                                 | Bulgaria                  |                         | +N                      |                             |
| De Keijzer (2018)     | 6,506       | Yes                                | UK                        |                         | + N                     | + N                         |
| Flouri (2019)         | 4,758       | Yes                                | UK                        | +                       |                         |                             |
| Hystad (2019)         | 6,658       | Yes                                | Canada                    |                         | - N                     |                             |
| Kuhn (2017)           | 341         | No                                 | Germany                   |                         |                         | +N                          |
| Liao (2019)           | 1,312       | No                                 | China                     | +                       |                         |                             |
| Reuben (2019)         | 1,658       | Yes                                | UK                        | N                       |                         |                             |
| Wang (2017)           | 3,544       | No                                 | China                     |                         |                         | N                           |
| Ward (2016)           | 72          | No                                 | New Zealand               | N                       |                         |                             |
| Wu (2015)             | 2,424       | Yes                                | UK                        |                         |                         | -                           |
| Wu (2017)             | 7,505       | Yes                                | UK                        |                         |                         | - N                         |
| Yu (2018)             | 3,240       | No                                 | China                     |                         |                         | N                           |
| Yuchi (2020)          | 678,000     | Yes                                | Canada                    |                         | + -                     | + -                         |
| Zhu (2020)            | 6,994       | Yes                                | China                     |                         |                         | +                           |
| Zijlema (2017)        | 1,628       | Yes                                | Spain, UK,<br>Netherlands |                         | + N                     | + N                         |
|                       |             | Studies with positive associations |                           | 5                       | 4                       | 8                           |
|                       |             | Studies with inverse associations  |                           | 0                       | 2                       | 3                           |
|                       |             | Studies with null associations     |                           | 6                       | 6                       | 8                           |
|                       |             | Total studies                      |                           | 8                       | 7                       | 13                          |

Abbreviations: US = United States; UK = United Kingdom; + = positive association; - = inverse association; N = null association

<sup>a</sup> Full list of papers found in Supplemental Text 1

Table 2. Summary of green space-brain health associations by green space measure

| Citation <sup>a</sup> | Sample size | Pop. based/<br>random sample | Location                           | Longitudinal green space | Greenness (NDVI, EVI) | Percent/<br>area park space | Percent green space | Time spent in green space | Distance to natural outdoor environment | Other green space |
|-----------------------|-------------|------------------------------|------------------------------------|--------------------------|-----------------------|-----------------------------|---------------------|---------------------------|-----------------------------------------|-------------------|
| Brown (2018)          | 249,405     | Yes                          | US                                 | No                       | +                     |                             |                     |                           |                                         |                   |
| Cherrie (2018)        | 281         | Yes                          | UK                                 | Yes                      |                       | + N                         |                     |                           |                                         |                   |
| Cherrie (2019)        | 281         | Yes                          | UK                                 | Yes                      |                       | + N                         |                     |                           |                                         |                   |
| Clarke (2012)         | 949         | Yes                          | US                                 | No                       |                       | N                           |                     |                           |                                         |                   |
| Dadvand (2015)        | 2,593       | No                           | Spain                              | No                       | + N                   |                             |                     |                           |                                         |                   |
| Dadvand (2017)        | 987         | Yes                          | Spain                              | Yes                      | + N                   |                             |                     |                           |                                         |                   |
| Dadvand (2018)        | 253         | No                           | Spain                              | Yes                      | + N                   |                             |                     |                           |                                         |                   |
| Dzhambov (2019)       | 112         | No                           | Bulgaria                           | No                       | + N                   |                             |                     |                           |                                         |                   |
| De Keijzer (2018)     | 6,506       | Yes                          | UK                                 | Yes                      | + N                   |                             |                     |                           |                                         |                   |
| Flouri (2019)         | 4,758       | Yes                          | UK                                 | No                       |                       |                             | +                   |                           |                                         |                   |
| Hystad (2019)         | 6,658       | Yes                          | Canada                             | Yes                      | - N                   |                             |                     |                           |                                         |                   |
| Kuhn (2017)           | 341         | No                           | Germany                            | No                       |                       |                             | +N                  |                           |                                         |                   |
| Liao (2019)           | 1,312       | No                           | China                              | No                       | +                     |                             |                     |                           |                                         |                   |
| Reuben (2019)         | 1,658       | Yes                          | UK                                 | Yes                      | N                     |                             |                     |                           |                                         |                   |
| Wang (2017)           | 3,544       | No                           | China                              | No                       | N                     |                             |                     |                           |                                         |                   |
| Ward (2016)           | 72          | No                           | New Zealand                        | No                       |                       |                             |                     | N                         |                                         |                   |
| Wu (2015)             | 2,424       | Yes                          | UK                                 | No                       |                       |                             | -                   |                           |                                         |                   |
| Wu (2017)             | 7,505       | Yes                          | UK                                 | No                       |                       |                             | - N                 |                           |                                         |                   |
| Yu (2018)             | 3,240       | No                           | China                              | No                       | N                     |                             |                     |                           |                                         |                   |
| Yuchi (2020)          | 678,000     | Yes                          | Canada                             | Yes                      | + -                   |                             |                     |                           |                                         |                   |
| Zhu (2020)            | 6,994       | Yes                          | China                              | Yes                      | +                     |                             |                     |                           |                                         |                   |
| Zijlema (2017)        | 1,628       | Yes                          | Spain, UK, Netherlands             | No                       | N                     |                             |                     | N                         | +                                       | N                 |
|                       |             |                              | Studies with positive associations |                          | 9                     | 2                           | 2                   | 0                         | 1                                       | 0                 |
|                       |             |                              | Studies with inverse associations  |                          | 2                     | 0                           | 2                   | 0                         | 0                                       | 0                 |
|                       |             |                              | Studies with null associations     |                          | 10                    | 3                           | 2                   | 2                         | 0                                       | 1                 |
|                       |             |                              | Total studies                      |                          | 14                    | 3                           | 4                   | 2                         | 1                                       | 1                 |

Abbreviations: NDVI = normalized difference vegetation index; EVI = enhanced vegetation index; US = United States; UK = United Kingdom; + = positive association; - = inverse association; N = null association

<sup>a</sup> Full list of papers found in Supplemental Text 1



Table 3. Summary of green space-brain health associations by brain health measure

| Citation <sup>a</sup> | Sample size | Population based / random sample | Location                           | Longitudinal brain health measure | Cognition | MRI brain regions | Diagnosis of cognitive impairment/ dementia |
|-----------------------|-------------|----------------------------------|------------------------------------|-----------------------------------|-----------|-------------------|---------------------------------------------|
| Brown (2018)          | 249,405     | Yes                              | US                                 | No                                |           |                   | +                                           |
| Cherrie (2018)        | 281         | Yes                              | UK                                 | Yes                               | + N       |                   |                                             |
| Cherrie (2019)        | 281         | Yes                              | UK                                 | Yes                               | + N       |                   |                                             |
| Clarke (2012)         | 949         | Yes                              | US                                 | No                                | N         |                   |                                             |
| Dadvand (2015)        | 2,593       | No                               | Spain                              | Yes                               | + N       |                   |                                             |
| Dadvand (2017)        | 987         | Yes                              | Spain                              | Yes                               | + N       |                   |                                             |
| Dadvand (2018)        | 253         | No                               | Spain                              | No                                |           | + N               |                                             |
| Dzhambov (2019)       | 112         | No                               | Bulgaria                           | No                                | +         | +N                |                                             |
| De Keijzer (2018)     | 6,506       | Yes                              | UK                                 | Yes                               | + N       |                   |                                             |
| Flouri (2019)         | 4,758       | Yes                              | UK                                 | No                                | +         |                   |                                             |
| Hystad (2019)         | 6,658       | Yes                              | Canada                             | No                                | - N       |                   |                                             |
| Kuhn (2017)           | 341         | No                               | Germany                            | No                                |           | +N                |                                             |
| Liao (2019)           | 1,312       | No                               | China                              | No                                | +         |                   |                                             |
| Reuben (2019)         | 1,658       | Yes                              | UK                                 | Yes                               | N         |                   |                                             |
| Wang (2017)           | 3,544       | No                               | China                              | No                                | N         |                   |                                             |
| Ward (2016)           | 72          | No                               | New Zealand                        | No                                | N         |                   |                                             |
| Wu (2015)             | 2,424       | Yes                              | UK                                 | No                                |           |                   | -                                           |
| Wu (2017)             | 7,505       | Yes                              | UK                                 | No                                |           |                   | - N                                         |
| Yu (2018)             | 3,240       | No                               | China                              | No                                | N         |                   |                                             |
| Yuchi (2020)          | 678,000     | Yes                              | Canada                             | Yes                               |           |                   | + -                                         |
| Zhu (2020)            | 6,994       | Yes                              | China                              | Yes                               |           |                   | +                                           |
| Zijlema (2017)        | 1,628       | Yes                              | Spain, UK, Netherlands             | No                                | + N       |                   |                                             |
|                       |             |                                  | Studies with positive associations |                                   | 9         | 3                 | 3                                           |
|                       |             |                                  | Studies with inverse associations  |                                   | 1         | 0                 | 3                                           |
|                       |             |                                  | Studies with null associations     |                                   | 12        | 3                 | 1                                           |
|                       |             |                                  | Total studies                      |                                   | 15        | 3                 | 5                                           |

Abbreviations: + = positive association; - = inverse association; N = null association; US = United States; UK = United Kingdom

<sup>a</sup> Full list of papers found in Supplemental Text 1

Table 4. Findings by green space-brain health association investigated and author name

| Green space measure <sup>h</sup> | Cognition            |        |                      | MRI                  |   |                      | Diagnosis of cognitive impairment/dementia |                 |                 |
|----------------------------------|----------------------|--------|----------------------|----------------------|---|----------------------|--------------------------------------------|-----------------|-----------------|
|                                  | +                    | -      | N                    | +                    | - | N                    | +                                          | -               | N               |
| Greenness/ NDVI                  | Dadvand <sup>a</sup> | Hystad | Dadvand <sup>a</sup> | Dadvand <sup>c</sup> |   | Dadvand <sup>c</sup> | Yuchi                                      | Yuchi           |                 |
|                                  | Dadvand <sup>b</sup> |        | Dadvand <sup>b</sup> | Dzhambov             |   | Dzhambov             | Brown                                      |                 |                 |
|                                  | Liao                 |        | Reuben               |                      |   |                      |                                            |                 |                 |
|                                  | De Keijzer           |        | De Keijzer           |                      |   |                      |                                            |                 |                 |
|                                  | Zhu                  |        | Hystad               |                      |   |                      |                                            |                 |                 |
|                                  | Dzhambov             |        | Zijlema              |                      |   |                      |                                            |                 |                 |
| Percent green/ park space        | Cherrie <sup>d</sup> |        | Cherrie <sup>d</sup> | Kuhn                 |   | Kuhn                 |                                            | Wu <sup>f</sup> | Wu <sup>g</sup> |
|                                  | Cherrie <sup>e</sup> |        | Cherrie <sup>e</sup> |                      |   |                      |                                            | Wu <sup>g</sup> |                 |
|                                  | Flouri               |        | Clarke               |                      |   |                      |                                            |                 |                 |
| Time spent in green space        |                      |        | Ward                 |                      |   |                      |                                            |                 |                 |
|                                  |                      |        | Zijlema              |                      |   |                      |                                            |                 |                 |
| Other                            | Zijlema              |        | Zijlema              |                      |   |                      |                                            |                 |                 |

Abbreviations: NDVI = normalized difference vegetation index; MRI = magnetic resonance imaging; + = positive association; - = inverse association; N = null association

Year of publication: <sup>a</sup>2015; <sup>b</sup>2017; <sup>c</sup>2018; <sup>d</sup>2018; <sup>e</sup>2019; <sup>f</sup>2015; <sup>g</sup>2017

<sup>h</sup> Full list of papers found in Supplemental Text 1

**Contributor statement**

Dr. Besser is the sole author of this paper and as such completed all of the work, including data acquisition and interpretation, drafting and revising the paper for intellectual content, final approval of the version to be published, and agreement to be accountable for all aspects of the work.

For peer review only

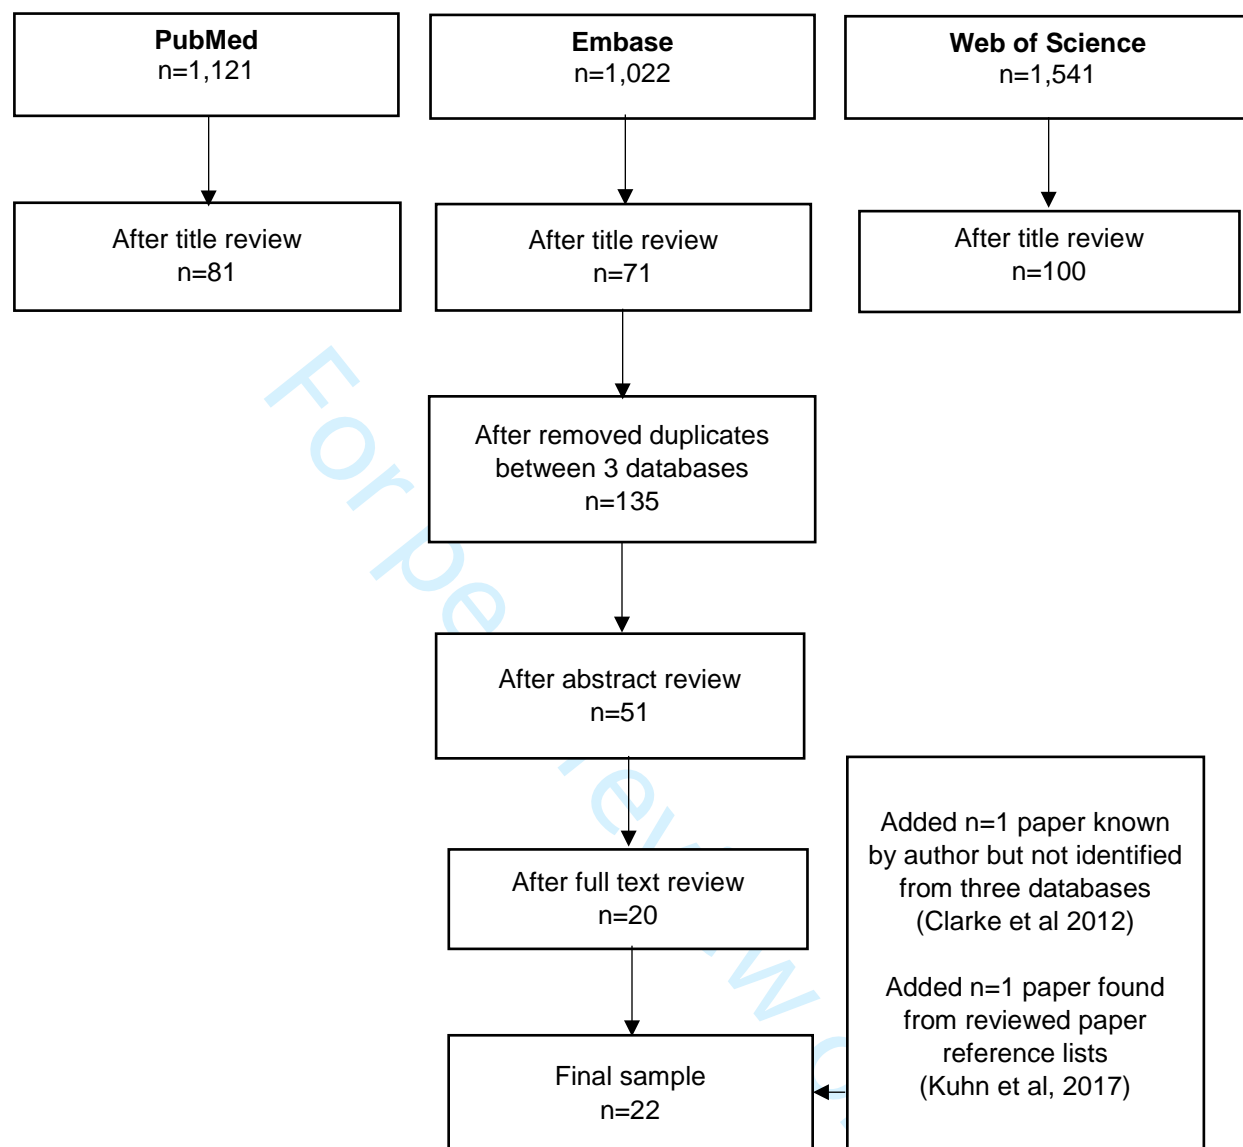

1  
2  
3  
4  
5  
6  
7  
8  
9  
10  
11  
12  
13  
14  
15  
16  
17  
18  
19  
20  
21  
22  
23  
24  
25  
26  
27  
28  
29  
30  
31  
32  
33  
34  
35  
36  
37  
38  
39  
40  
41  
42  
43  
44  
45  
46  
47

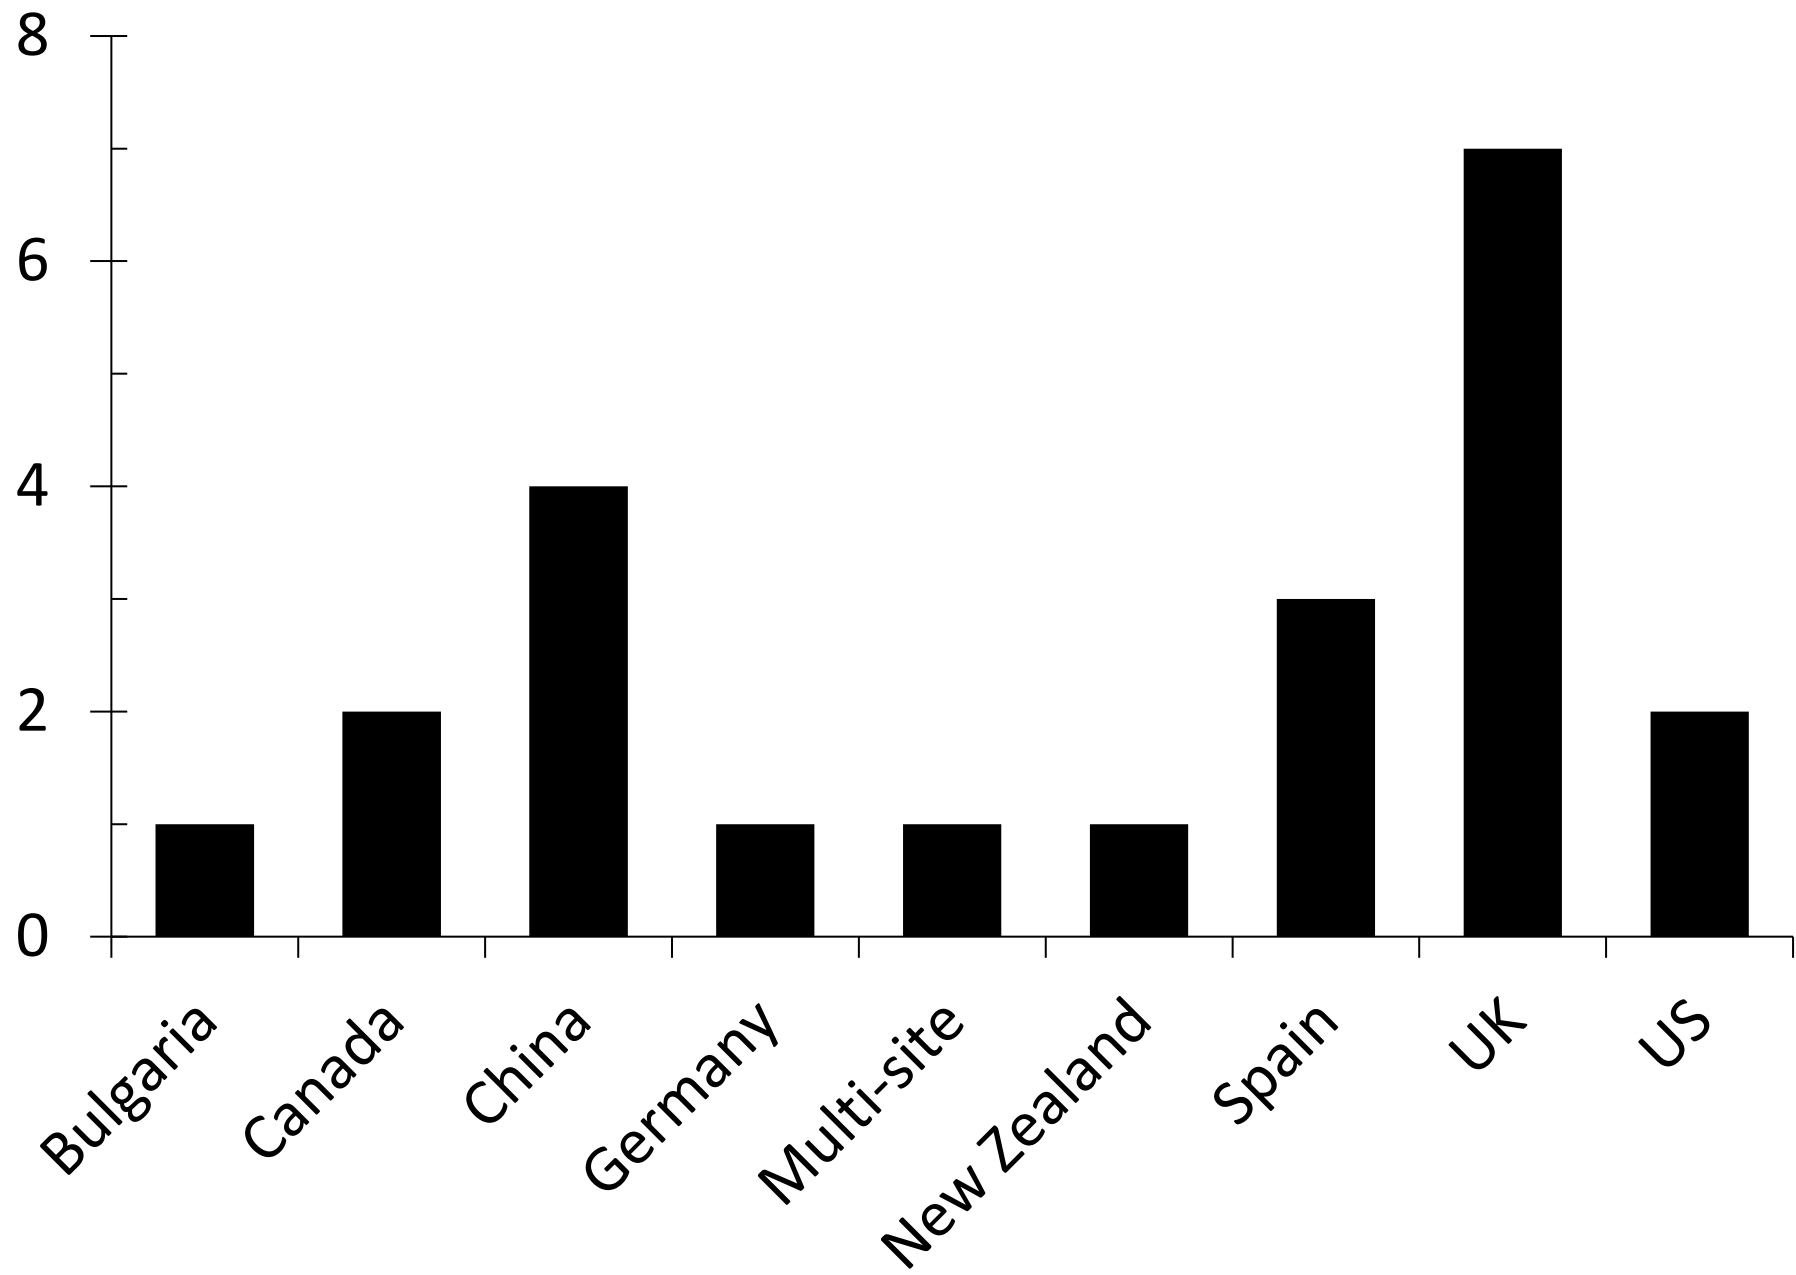

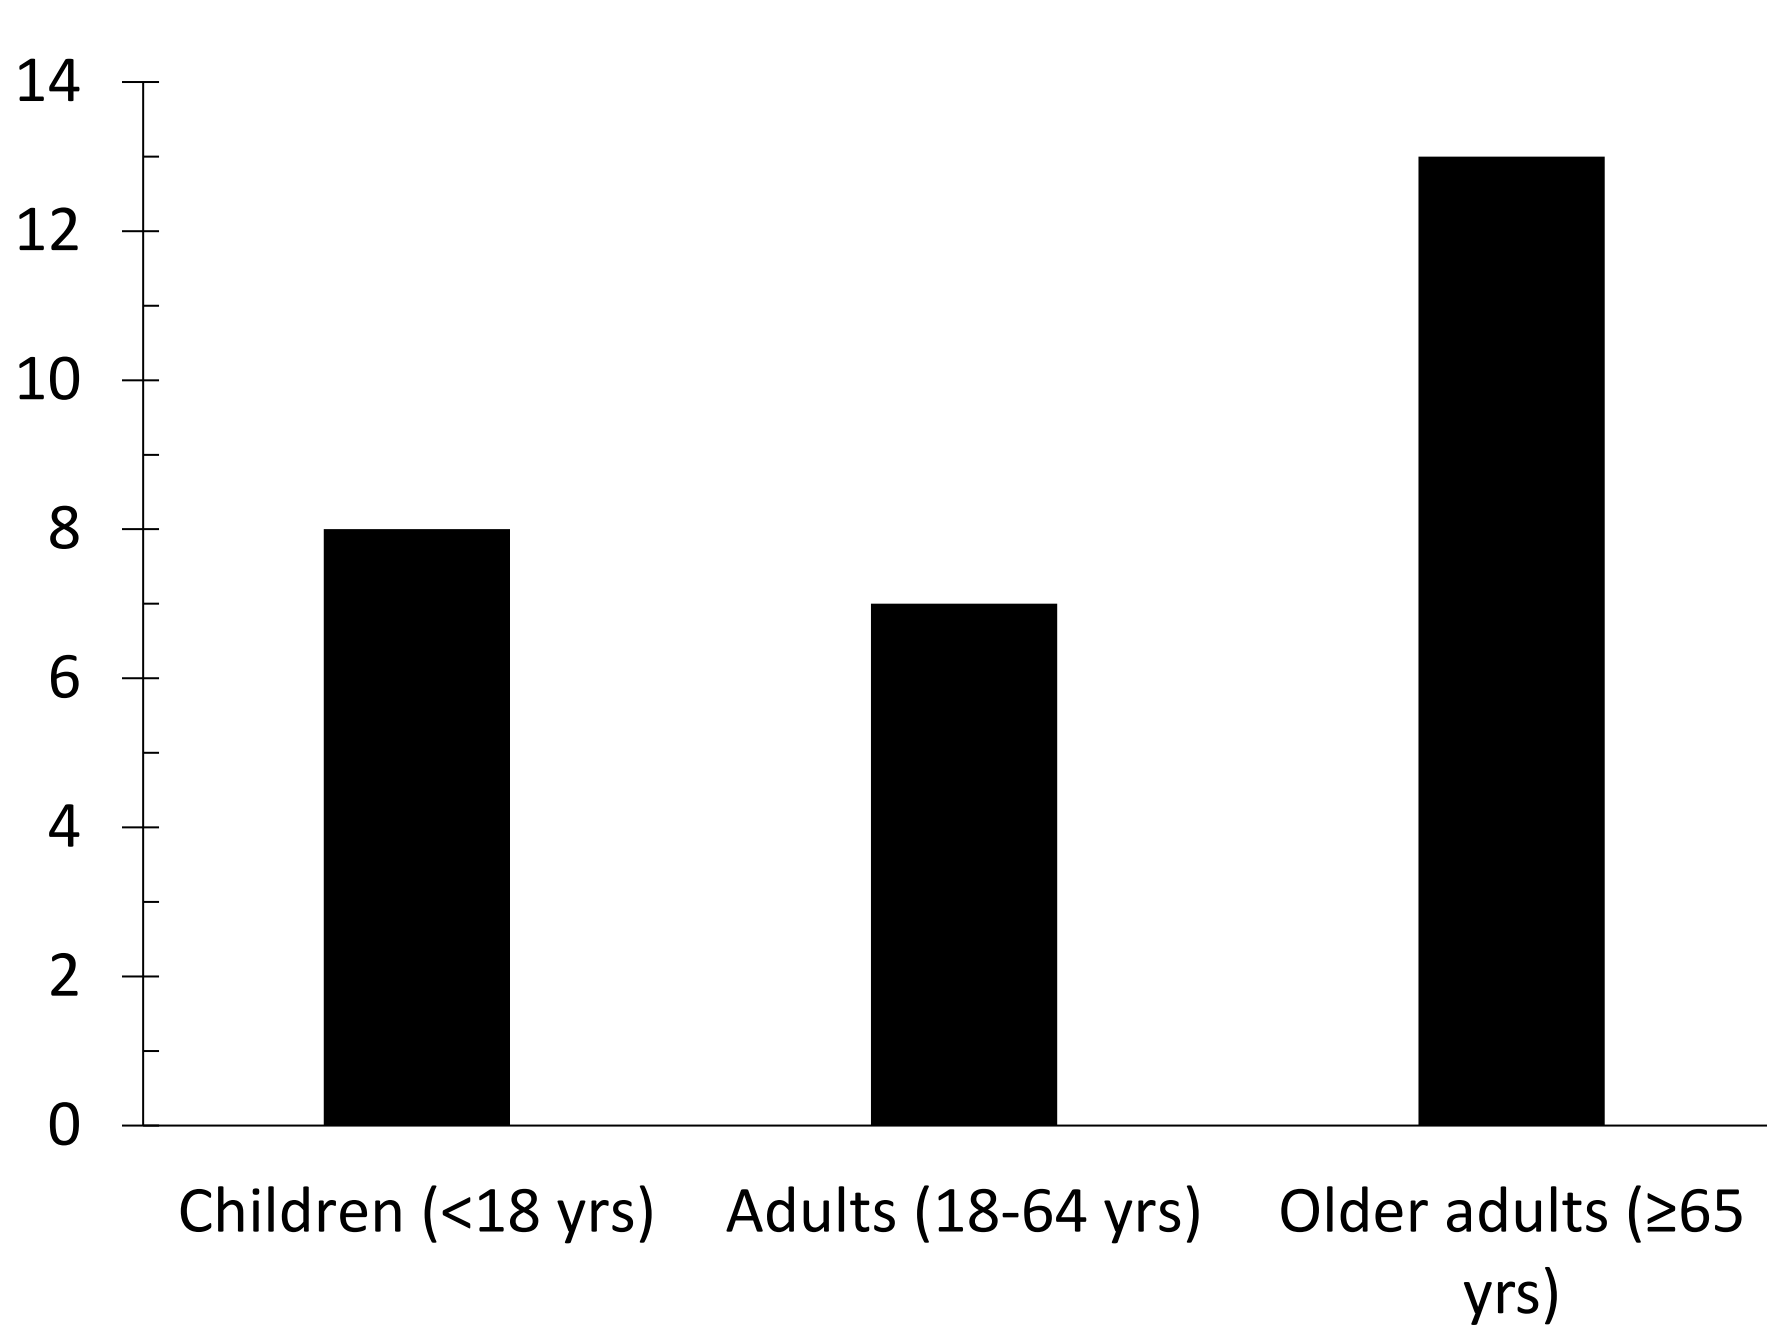

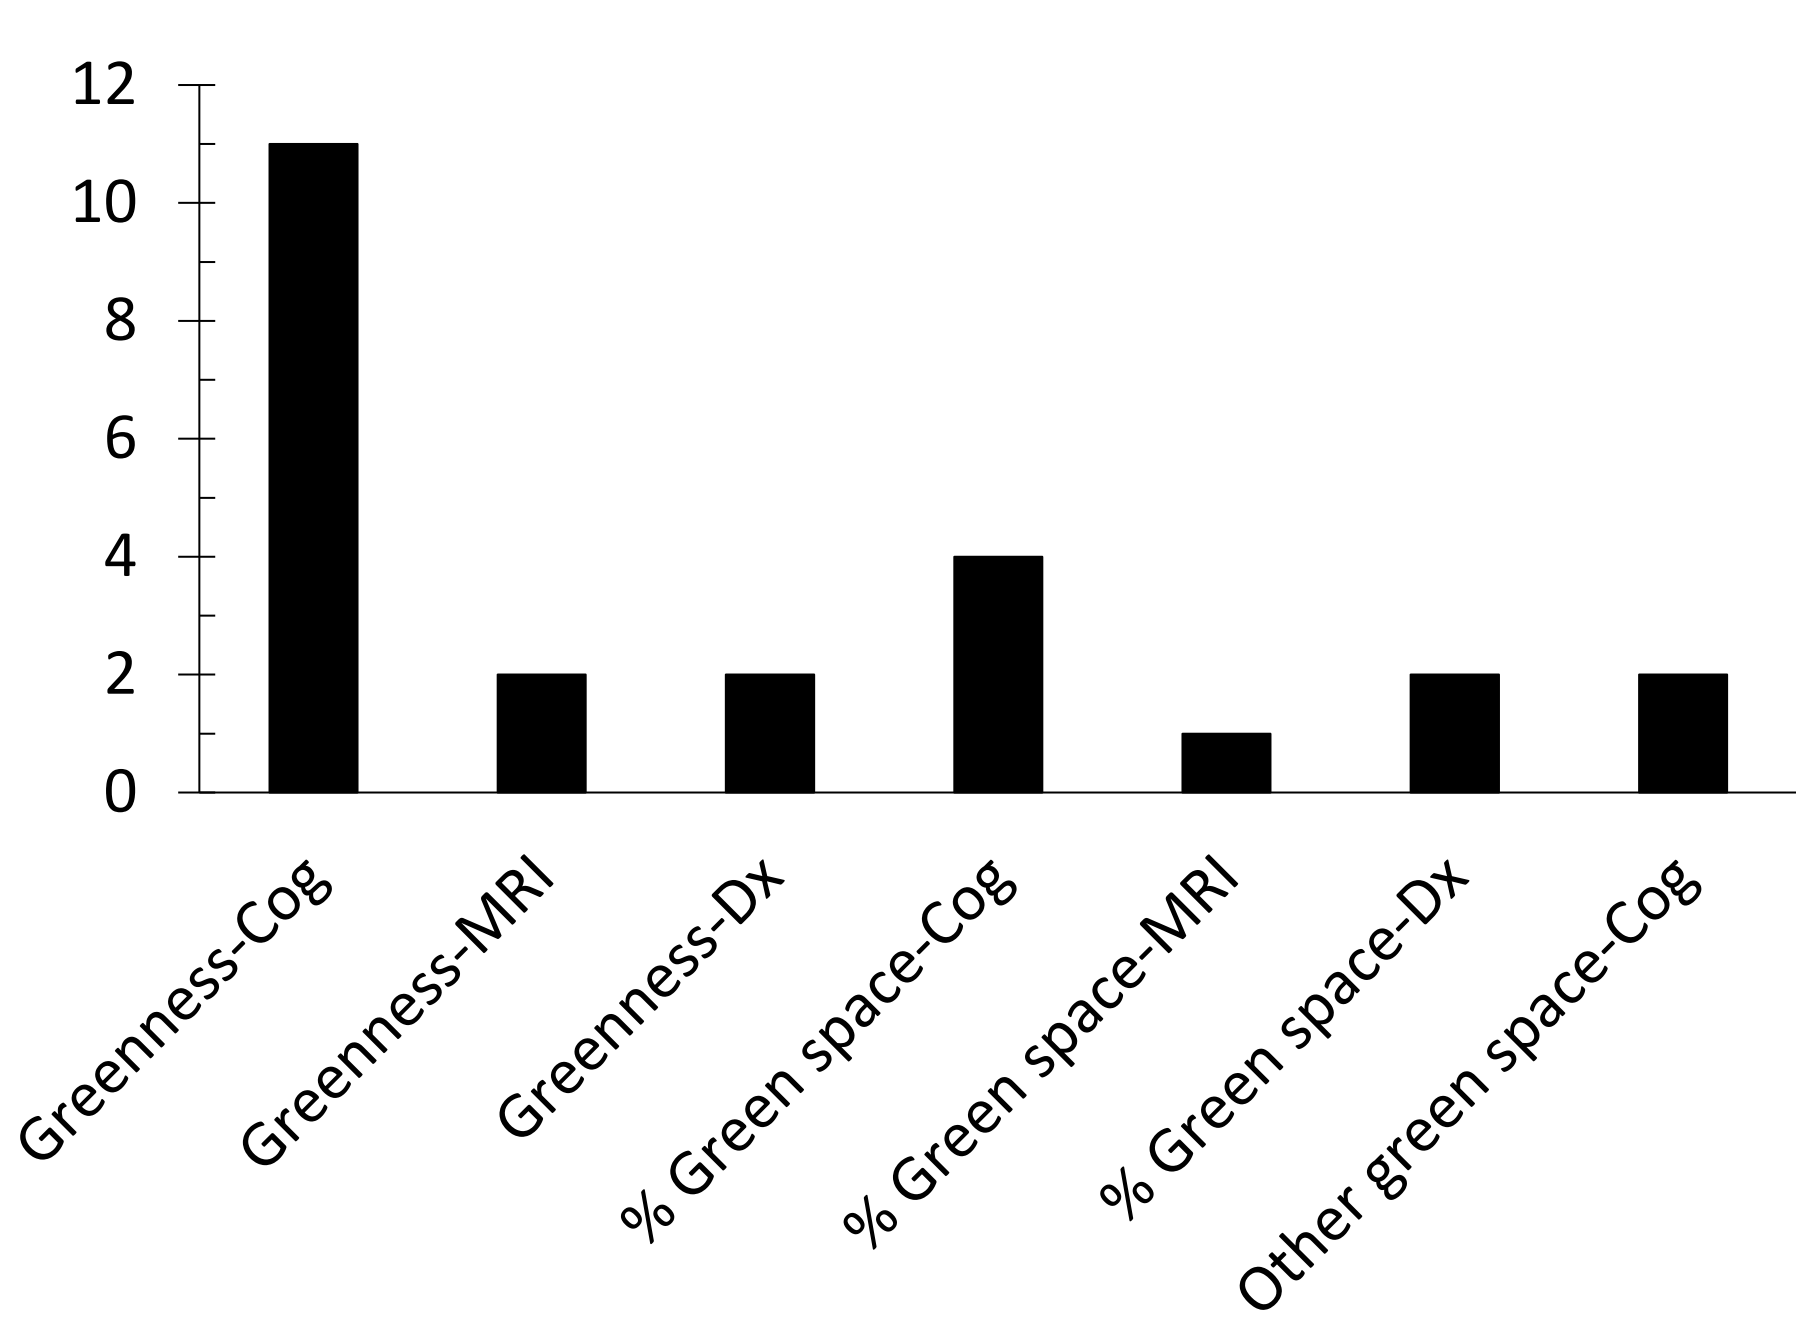

**Supplemental Figure 1.** Detailed diagram of literature search strategy

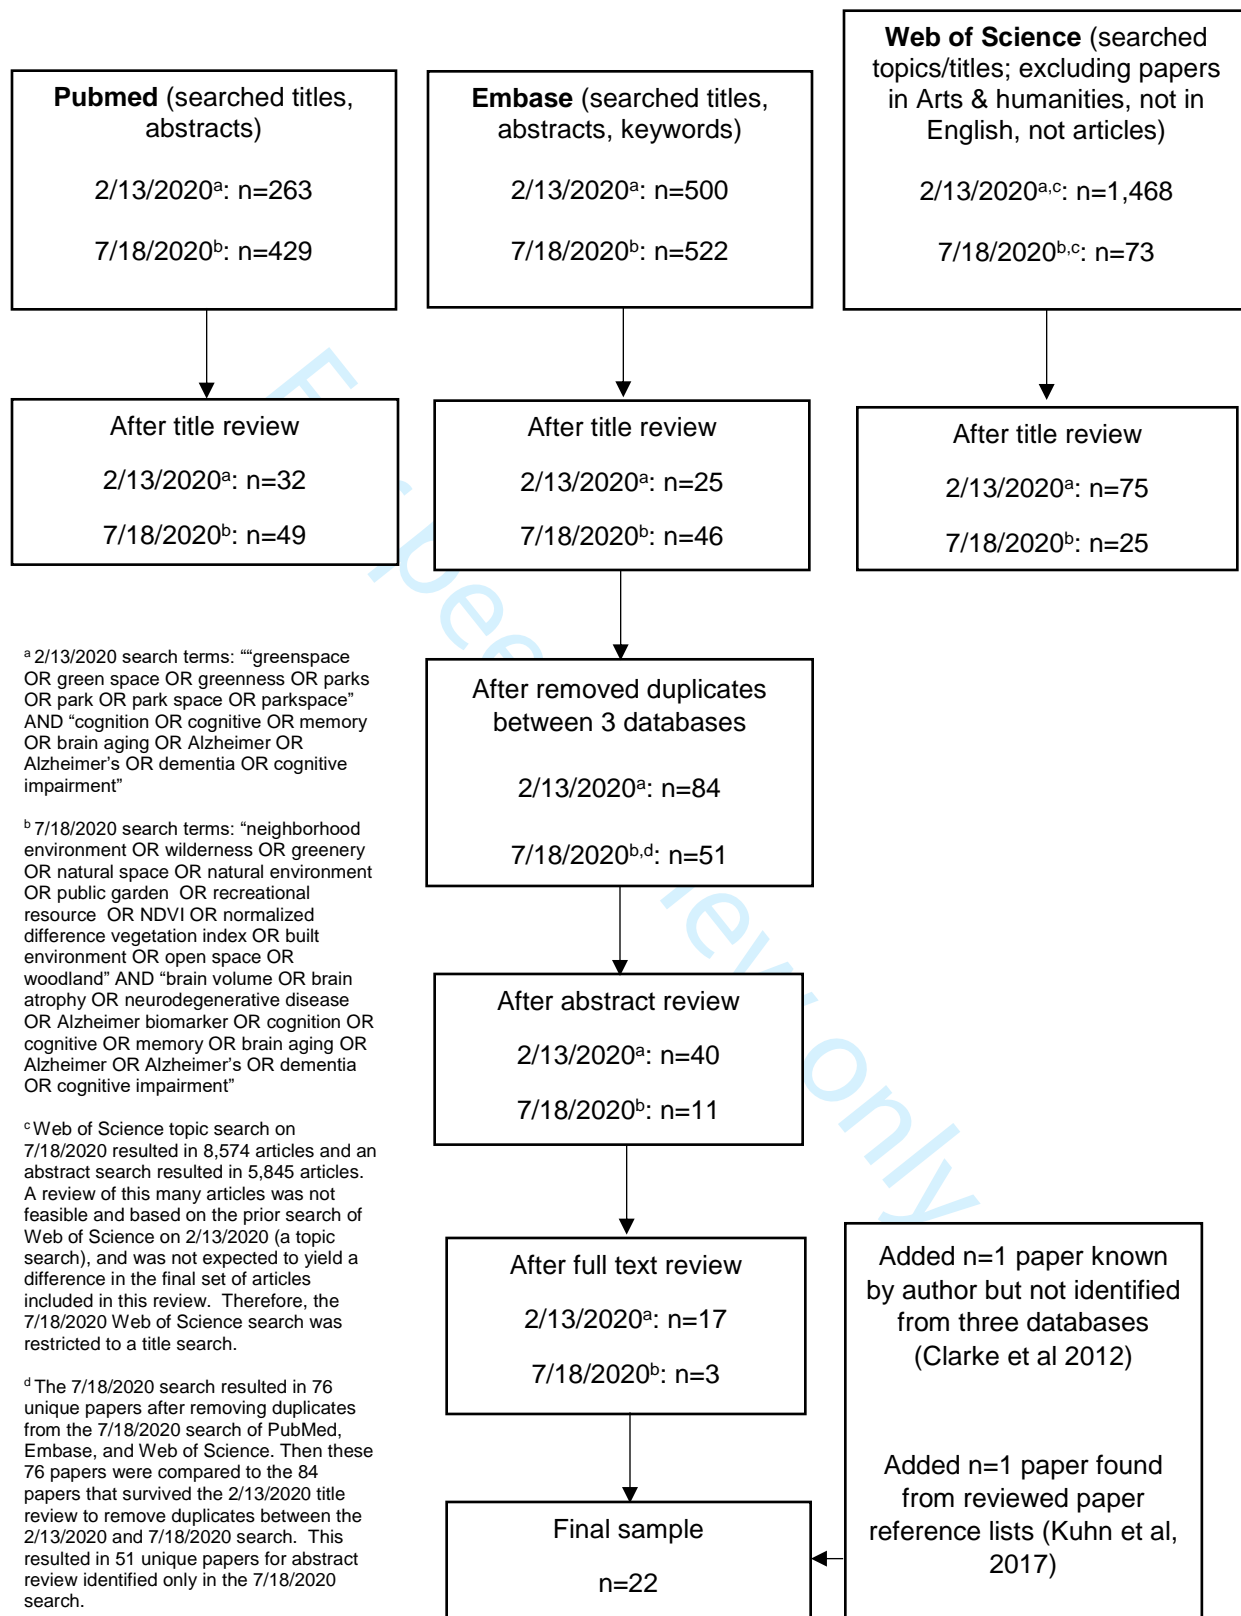



**Supplemental Text 1. List of 22 papers included in systematic review**

- Brown SC et al. (2018) Health Disparities in the Relationship of Neighborhood Greenness to Mental Health Outcomes in 249,405 U.S. Medicare Beneficiaries *Int J Environ Res Public Health* 15 doi:10.3390/ijerph15030430
- Cherrie MPC et al. (2018) Green space and cognitive ageing: A retrospective life course analysis in the Lothian Birth Cohort 1936 *Soc Sci Med* 196:56-65 doi:10.1016/j.socscimed.2017.10.038
- Cherrie MPC, Shortt NK, Ward Thompson C, Deary IJ, Pearce JR (2019) Association Between the Activity Space Exposure to Parks in Childhood and Adolescence and Cognitive Aging in Later Life *Int J Environ Res Public Health* 16 doi:10.3390/ijerph16040632
- Clarke PJ, Ailshire JA, House JS, Morenoff JD, King K, Melendez R, Langa KM (2012) Cognitive function in the community setting: the neighbourhood as a source of 'cognitive reserve'? *J Epidemiol Community Health* 66:730-736 doi:10.1136/jech.2010.128116
- Dadvand P et al. (2015) Green spaces and cognitive development in primary schoolchildren *Proc Natl Acad Sci U S A* 112:7937-7942 doi:10.1073/pnas.1503402112
- Dadvand P et al. (2018) The Association between Lifelong Greenspace Exposure and 3-Dimensional Brain Magnetic Resonance Imaging in Barcelona Schoolchildren *Environ Health Perspect* 126:027012 doi:10.1289/EHP1876
- Dadvand P et al. (2017) Lifelong Residential Exposure to Green Space and Attention: A Population-based Prospective Study *Environ Health Perspect* 125:097016 doi:10.1289/EHP694
- Dzhambov AM, Bahchevanov KM, Chompalov KA, Atanassova PA (2019) A feasibility study on the association between residential greenness and neurocognitive function in middle-aged Bulgarians *Arh Hig Rada Toksikol* 70:173-185 doi:10.2478/aiht-2019-70-3326
- de Keijzer C et al. (2018) Residential Surrounding Greenness and Cognitive Decline: A 10-Year Follow-up of the Whitehall II Cohort *Environ Health Perspect* 126:077003 doi:10.1289/EHP2875
- Flouri E, Papachristou E, Midouhas E (2019) The role of neighbourhood greenspace in children's spatial working memory *The British journal of educational psychology* 89:359-373 doi:10.1111/bjep.12243
- Hystad P PY, Noisel N, Boileau C (2019) Green space associations with mental health and cognitive function: Results from the Quebec CARTaGENE cohort *Environmental Epidemiology* 3:e040
- Kuhn S et al. (2017) In search of features that constitute an "enriched environment" in humans: Associations between geographical properties and brain structure *Scientific reports* 7 doi:ARTN 11920
- Liao J et al. (2019) Residential exposure to green space and early childhood neurodevelopment *Environment international* 128:70-76 doi:10.1016/j.envint.2019.03.070
- Reuben A et al. (2019) Residential neighborhood greenery and children's cognitive development *Social science & medicine* (1982) 230:271-279 doi:10.1016/j.socscimed.2019.04.029
- Wang D, Lau KK, Yu R, Wong SYS, Kwok TTY, Woo J (2017) Neighbouring green space and mortality in community-dwelling elderly Hong Kong Chinese: a cohort study *BMJ open* 7:e015794 doi:10.1136/bmjopen-2016-015794
- Ward JS, Duncan JS, Jarden A, Stewart T (2016) The impact of children's exposure to greenspace on physical activity, cognitive development, emotional wellbeing, and ability to appraise risk *Health Place* 40:44-50 doi:10.1016/j.healthplace.2016.04.015
- Wu YT, Prina AM, Jones A, Matthews FE, Brayne C, Collaboration MRCCF, Study A (2017) The Built Environment and Cognitive Disorders: Results From the Cognitive Function and Ageing Study II *Am J Prev Med* doi:10.1016/j.amepre.2016.11.020
- Wu YT et al. (2015) Community environment, cognitive impairment and dementia in later life: results from the Cognitive Function and Ageing Study *Age Ageing* 44:1005-1011 doi:10.1093/ageing/afv137
- Yu R, Wang D, Leung J, Lau K, Kwok T, Woo J (2018) Is Neighborhood Green Space Associated With Less Frailty? Evidence From the Mr. and Ms. Os (Hong Kong) Study *Journal of the American Medical Directors Association* 19:528-534 doi:10.1016/j.jamda.2017.12.015
- Yuchi W, Sbihi H, Davies H, Tamburic L, Brauer M (2020) Road proximity, air pollution, noise, green space and neurologic disease incidence: a population-based cohort study *Environmental health : a global access science source* 19:8 doi:10.1186/s12940-020-0565-4
- Zhu A, Yan L, Shu C, Zeng Y, Ji JS (2020) APOE epsilon4 Modifies Effect of Residential Greenness on Cognitive Function among Older Adults: A Longitudinal Analysis in China *Scientific reports* 10:82 doi:10.1038/s41598-019-57082-7
- Zijlema WL et al. (2017) The relationship between natural outdoor environments and cognitive functioning and its mediators *Environ Res* 155:268-275 doi:10.1016/j.envres.2017.02.017

Supplemental Table 1. Green space and brain health studies including children and adolescents (&lt;18 year olds)

| Citation <sup>a</sup> , sample size, location      | Sample source                   | Age, sex, race/ethnicity                                                    | Green space measure                                                                                                                                                 | Brain health measure                                                                                                                                                                          | Statistical Method (covariates)                                                                                                                                                                   | Associations (positive, inverse, null)                                                                                                                                                                                                                                                                                                                                                                                     |
|----------------------------------------------------|---------------------------------|-----------------------------------------------------------------------------|---------------------------------------------------------------------------------------------------------------------------------------------------------------------|-----------------------------------------------------------------------------------------------------------------------------------------------------------------------------------------------|---------------------------------------------------------------------------------------------------------------------------------------------------------------------------------------------------|----------------------------------------------------------------------------------------------------------------------------------------------------------------------------------------------------------------------------------------------------------------------------------------------------------------------------------------------------------------------------------------------------------------------------|
| Cherrie (2018)<br>n=281<br><br>Edinburgh, Scotland | Lothian Birth Cohort (P)        | 11-78 years<br><br>48% female<br><br>Race/ethnicity not specified           | Park space (L): % park space (Location: residential; Boundary: 500m, 1000m, 1500m buffer) Time period: childhood, adulthood, older adulthood                        | Cognition (L): Moray House Test No 12 (domain: intelligence) Time period: childhood, adulthood, older adulthood                                                                               | Multivariable linear regression (sex, father's occupation, number per room in childhood household, childhood smoking status, adulthood occupation, alcohol consumption, adulthood smoking status) | Positive: Greater neighborhood % park space in childhood and adulthood associated with less cognitive change from 70 to 76 years.<br>Null: Greater neighborhood % park space in childhood, adulthood, and older adulthood not associated with cognitive change from age 11 to 70. No association between % park space in late-life and cognitive change from 70 to 76 years.                                               |
| Dadvand (2015)<br>n=2,593<br><br>Barcelona, Spain  | 36 primary schools in Barcelona | 7-10 years (mean=8.5)<br><br>50% female<br><br>16% not Spanish, 84% Spanish | Greenness (CS): NDVI (Location: residential, school, school commute; Boundary: residential-250m buffer, school and commute route-50m buffer) Time period: childhood | Cognition (L): Computerized n-back test (domain: working memory); Computerized attentional network test (domain: attention, alerting, orienting, executive processing) Time period: childhood | Multivariable linear mixed effects regression (age, sex, maternal education, residential neighborhood SES)                                                                                        | Positive: Greater school greenness and total greenness (school, home, commute) associated with 12-month enhancement in working memory and attention. Greater commute route greenness associated with 12-month enhancement in working memory.<br>Null: No association between residential greenness and cognition, commute greenness and attention, or any greenness measure and alerting, orienting, executive processing. |

1  
2  
3  
4  
5  
6  
7  
8  
9  
10  
11  
12  
13  
14  
15  
16  
17  
18  
19  
20  
21  
22  
23  
24  
25  
26  
27  
28  
29  
30  
31  
32  
33  
34  
35  
36  
37  
38  
39  
40  
41  
42  
43  
44  
45  
46  
47

|                                                                          |                                                                                      |                                                               |                                                                                                                                                                             |                                                                                                                                                                                      |                                                                                                                                                                                                                           |                                                                                                                                                                                                                                                                             |
|--------------------------------------------------------------------------|--------------------------------------------------------------------------------------|---------------------------------------------------------------|-----------------------------------------------------------------------------------------------------------------------------------------------------------------------------|--------------------------------------------------------------------------------------------------------------------------------------------------------------------------------------|---------------------------------------------------------------------------------------------------------------------------------------------------------------------------------------------------------------------------|-----------------------------------------------------------------------------------------------------------------------------------------------------------------------------------------------------------------------------------------------------------------------------|
| Dadvand (2017)<br>n=888 at 4-5 year follow-up; n=987 at 7-year follow-up | Infancia y Medio Ambiente (INMA) cohort (P)                                          | 4-7 years<br>49% female<br>Race/ethnicity not specified       | Greenness (L): NDVI and Vegetation Continuous Fields (% woody vegetation >5 m high)<br>(Location: residential; Boundary: 100m, 300m, 500m buffer)<br>Time period: childhood | Cognition (L): Conners' Kiddie Continuous Performance Test (4-5 year olds) (domain: attention); Attentional Network Task (7 year olds) (domain: attention)<br>Time period: childhood | Multivariable linear mixed effects regression (age, sex, preterm birth, maternal cognitive performance, maternal smoking during pregnancy, exposure to environmental tobacco smoke, maternal education, neighborhood SES) | Positive: Greater neighborhood greenness (birth to 4-5 years old) associated with attention at 4-5 years and greater greenness (birth to 7 years old) associated with attention at 7 years old.<br>Null: % neighborhood woody vegetation >5m not associated with attention. |
| Dadvand (2018)<br>n=253<br>Barcelona, Spain                              | Brain Development and Air Pollution Ultrafine Particles in School Children (BREATHE) | Mean: 8.4 years<br>49% female<br>Race/ethnicity not specified | Greenness (L): NDVI (Location: residential; Boundary: 100m, 500m buffer)<br>Time period: childhood                                                                          | Magnetic Resonance Imaging (CS) of gray and white matter in regional clusters<br>Time period: childhood                                                                              | Adjusted voxel-wise regression using statistical parametric maps (maternal education, neighborhood SES- included one or the other in the analysis)                                                                        | Positive: Greater neighborhood greenness exposure since birth associated with left and right prefrontal cortex, left premotor cortex, and white matter.<br>Null: No associations between greenness and other brain regions.                                                 |
| Flouri (2019)<br>n=4,758<br>UK                                           | UK Millenium Cohort Study (MCS) (P)                                                  | Mean: 10.6 years<br>49% female<br>74% white<br>26% non-white  | Green space (CS): % green space (Location: residential; Boundary: ward)<br>Time period: childhood                                                                           | Cognition (CS): Cambridge Neuropsychological Test Automated Battery SWM Test (domain: spatial working memory)<br>Time period: childhood                                              | Multivariable, multilevel linear regression (age in months, gender, family socioeconomic status, ethnicity, sports participation, computer gaming, residential mobility since infancy, neighborhood deprivation)          | Positive: Greater % neighborhood green space associated with better spatial working memory.                                                                                                                                                                                 |

1  
2  
3  
4  
5  
6  
7  
8  
9  
10  
11  
12  
13  
14  
15  
16  
17  
18  
19  
20  
21  
22  
23  
24  
25  
26  
27  
28  
29  
30  
31  
32  
33  
34  
35  
36  
37  
38  
39  
40  
41  
42  
43  
44  
45  
46  
47

|                          |                                                                          |                                                                       |                                                                                             |                                                                                                                                                                                                                                                                                                                                                                                       |                                                                                                                                                                                                                                                                                                                                           |                                                                                                                                                          |
|--------------------------|--------------------------------------------------------------------------|-----------------------------------------------------------------------|---------------------------------------------------------------------------------------------|---------------------------------------------------------------------------------------------------------------------------------------------------------------------------------------------------------------------------------------------------------------------------------------------------------------------------------------------------------------------------------------|-------------------------------------------------------------------------------------------------------------------------------------------------------------------------------------------------------------------------------------------------------------------------------------------------------------------------------------------|----------------------------------------------------------------------------------------------------------------------------------------------------------|
| Liao (2019)<br>n=1,312   | Women and Children Medical and Healthcare Center of Wuhan                | Mean: 39 weeks<br>46% female<br>Race/ethnicity not specified          | Greenness (CS): NDVI (Location: residential; Boundary: 300m buffer) Time period: childhood  | Cognition (CS): Bayley Scales of Infant Development – Mental Development Index (Domain: perceptual acutities, memory, learning and problem solving, abstract thinking) Time period: childhood                                                                                                                                                                                         | Multivariable, multiple linear regression (household income, maternal age, maternal education, maternal pre-pregnancy BMI, maternal passive smoking during pregnancy, gestational age, birth weight, residence areas)                                                                                                                     | Positive: Greater neighborhood greenness at birth associated with better Mental Development Index scores.                                                |
| Reuben (2019)<br>n=1,658 | Environmental Risk (E-Risk) Longitudinal Study (same sex twin study) (P) | Age 5, 12, and 18<br>52% female<br>Race/ethnicity not specified       | Greenness (L): NDVI (Location: residential; Boundary: 1-mile buffer) Time period: childhood | Cognition (L): Wechsler Preschool and Primary Scale of Intelligence-Revised, Wechsler Intelligence Scale for Children-IV, Wechsler Adult Intelligence Scale-IV (domain: crystallized and fluid cognitive ability); Spatial Span test (domain: executive function); Spatial Working Memory test (domain: working memory); Rapid Visual Information Processing test (domain: attention) | Multivariable analysis of covariance model for longitudinal model (sex, polygenic score for educational attainment, family socioeconomic status, neighborhood socioeconomic status)<br><br>Multivariable information maximum likelihood (FIML) estimated regression, accounting for missing data (same covariates as longitudinal models) | Null: Neighborhood greenness not associated with fluid ability, crystallized ability, executive function, attention, or working memory measured any age. |
| Ward (2016)<br>n=72      | Three intermediate schools                                               | 11-14 years (mean=12.7)<br>59% female<br>Race/ethnicity not specified | Time spent in green space from GPS (CS) Time period: childhood                              | Cognition (CS): CNS Vital Signs (domain: visual memory, verbal memory, processing speed, psychomotor speed, reaction time, cognitive flexibility, executive function) Time period: childhood                                                                                                                                                                                          | Multivariable generalized linear mixed regression (sex, age, school)                                                                                                                                                                                                                                                                      | Null: % time spent in greenspace not associated with any cognitive domain.                                                                               |

Abbreviations: CS = cross-sectional; L= longitudinal; UK = United Kingdom; P = population-based/random sampling

<sup>a</sup> Full list of papers found in Supplemental Text 1

Supplemental Table 2. Green space and brain health studies including adults aged 18-64 years

| Citation <sup>a</sup> , sample size, location | Sample source                            | Age, sex, race/ethnicity                                                               | Green space measure                                                                                                                                   | Brain health measure                                                                                                                                                                                                                                                               | Statistical Method (covariates)                                                                                                                                                                           | Associations (positive, inverse, null)                                                                                                                                                      |
|-----------------------------------------------|------------------------------------------|----------------------------------------------------------------------------------------|-------------------------------------------------------------------------------------------------------------------------------------------------------|------------------------------------------------------------------------------------------------------------------------------------------------------------------------------------------------------------------------------------------------------------------------------------|-----------------------------------------------------------------------------------------------------------------------------------------------------------------------------------------------------------|---------------------------------------------------------------------------------------------------------------------------------------------------------------------------------------------|
| Cherrie (2018)                                | See Table 1                              |                                                                                        |                                                                                                                                                       |                                                                                                                                                                                                                                                                                    |                                                                                                                                                                                                           |                                                                                                                                                                                             |
| Clarke (2012)<br>n = 949<br>Chicago, US       | Chicago Community Adult Health Study (P) | ≥50 years<br>56% female<br>37% black, 18% Hispanic, 43% white, 3% other race/ethnicity | Park space (CS):<br>Park area in square miles (Location: residential; Boundary: US Census tract)<br>Time period: adulthood, older adulthood           | Cognition (CS):<br>Modified Telephone Instrument for Cognitive Status (domain: global cognition)<br>Time period: adulthood, older adulthood                                                                                                                                        | Multivariable, multilevel linear regression (age, gender, marital status, race/ethnicity, employment status, socioeconomic position, index of comorbid conditions, physical activity, social interaction) | Null: neighborhood park area not associated with global cognition.                                                                                                                          |
| De Keijzer (2018)<br>n=6,506<br>UK            | The Whitehall II study (P)               | 45-68 years<br>29% female<br>91% white<br>9% non-white                                 | Greenness (L): NDVI and EVI (Location: residential; Boundary: 500m, 1000m buffer around postcode centroid)<br>Time period: adulthood, older adulthood | Cognition (L): Alice Heim 4 test of intelligence (domain: reasoning); S words, Animal names (domain: phonemic and semantic verbal fluency); Free recall test (domain: short-term memory); Global cognition z-score derived from 4 tests<br>Time period: adulthood, older adulthood | Multivariable linear mixed effects regression (gender, ethnicity, education, time varying: age, marital status, employment grade, neighborhood SSES, diet, alcohol consumption, smoking status)           | Positive: Greater neighborhood greenness associated with slower decline in global cognition, reasoning, and fluency.<br>Null: Neighborhood greenness not associated with short-term memory. |

|    |          |             |                |                         |                          |                                          |                         |
|----|----------|-------------|----------------|-------------------------|--------------------------|------------------------------------------|-------------------------|
| 1  |          |             |                |                         |                          |                                          |                         |
| 2  |          |             |                |                         |                          |                                          |                         |
| 3  | Dzhambov | Convenience | 45-55 years    | Greenness (CS):         | Cognition (CS):          | Multivariable linear                     | Positive: Greater       |
| 4  | (2019)   | sample of   | (mean: 50)     | NDVI                    | Consortium to            | regression (age, sex,                    | greenness associated    |
| 5  | n=112    | volunteers  | 59% female     | (Location: residential; | Establish a Registry for | education, city,                         | with better global      |
| 6  | Plovdiv, |             | Race/ethnicity | Boundary: 100m,         | Alzheimer's Disease      | neighborhood population,                 | cognition and verbal    |
| 7  | Bulgaria |             | not specified  | 100m, 750m, 1000m       | Neuropsychological       | smoking, alcohol                         | fluency. Greater        |
| 8  |          |             |                | buffer around           | Battery (CERAD-NB),      | consumption, waist                       | greenness associated    |
| 9  |          |             |                | residence)              | including Verbal         | circumference, blood                     | with greater cortical   |
| 10 |          |             |                | Time period:            | Fluency test (domain:    | pressure, cholesterol,                   | thickness in both       |
| 11 |          |             |                | adulthood               | fluency), modified       | blood glucose, nitrogen                  | hemispheres in the      |
| 12 |          |             |                |                         | Boston Naming Test       | dioxide [NO <sub>2</sub> ], road traffic | prefrontal cortex,      |
| 13 |          |             |                |                         | (domain: naming),        | noise)                                   | bilateral fusiform      |
| 14 |          |             |                |                         | Word List Memory         |                                          | gyrus, left precuneus   |
| 15 |          |             |                |                         | (domain: memory),        |                                          | and insula, and right   |
| 16 |          |             |                |                         | Word List Recall         |                                          | cuneus.                 |
| 17 |          |             |                |                         | (domain: memory),        |                                          | Null: Greater           |
| 18 |          |             |                |                         | Word List Recognition;   |                                          | greenness was not       |
| 19 |          |             |                |                         | Montreal Cognitive       |                                          | associated with         |
| 20 |          |             |                |                         | Assessment (MoCA)        |                                          | scores on the subtests  |
| 21 |          |             |                |                         | (domain: global          |                                          | of the CERAD-NB         |
| 22 |          |             |                |                         | cognition);              |                                          | except the Verbal       |
| 23 |          |             |                |                         | Magnetic Resonance       |                                          | Fluency Test. Greater   |
| 24 |          |             |                |                         | Imaging (CS) of          |                                          | greenness was not       |
| 25 |          |             |                |                         | cortical thickness of    |                                          | associated with         |
| 26 |          |             |                |                         | multiple brain regions   |                                          | cortical thickness in   |
| 27 |          |             |                |                         | of interest              |                                          | regions of the brain    |
| 28 |          |             |                |                         | Time period: adulthood   |                                          | other than those listed |
| 29 |          |             |                |                         |                          |                                          | above.                  |
| 30 | Hystad   | CARTaGENE   | 40-69 years    | Greenness (L): NDVI     | Cognition (CS):          | Multivariable linear                     | Inverse: Five-year      |
| 31 | (2019)   | Cohort (P)  | (mean: 55)     | (Location: residential; | Reaction time test       | regression (age, sex,                    | change in greenness     |
| 32 | n=6,658  |             | 55% female     | Boundary: 100m,         | (domain: reaction        | household income, race,                  | associated with worse   |
| 33 | Quebec,  |             | 81% white      | 300m, 500m, 1000m       | time); Paired            | marital status, city,                    | reasoning.              |
| 34 | Canada   |             | 19% non-white  | buffer around postal    | associates learning      | population density)                      | Null: Five-year         |
| 35 |          |             |                | codes)                  | (domain: working         |                                          | average neighborhood    |
| 36 |          |             |                | Time period:            | memory); verbal and      |                                          | greenness not           |
| 37 |          |             |                | adulthood               | numeric reasoning        |                                          | associated with         |
| 38 |          |             |                |                         | (domain: executive       |                                          | reaction time,          |
| 39 |          |             |                |                         | function)                |                                          | reasoning, or working   |
| 40 |          |             |                |                         | Time period: adulthood   |                                          | memory. Five-year       |
| 41 |          |             |                |                         |                          |                                          | change in greenness     |
| 42 |          |             |                |                         |                          |                                          | not associated with     |
| 43 |          |             |                |                         |                          |                                          | reaction time or        |
| 44 |          |             |                |                         |                          |                                          | working memory.         |
| 45 |          |             |                |                         |                          |                                          |                         |
| 46 |          |             |                |                         |                          |                                          |                         |
| 47 |          |             |                |                         |                          |                                          |                         |

1  
2  
3  
4  
5  
6  
7  
8  
9  
10  
11  
12  
13  
14  
15  
16  
17  
18  
19  
20  
21  
22  
23  
24  
25  
26  
27  
28  
29  
30  
31  
32  
33  
34  
35  
36  
37  
38  
39  
40  
41  
42  
43  
44  
45  
46  
47

|                                                                                    |                                                                                                                                  |                                                                             |                                                                                                                                                                                                                                                                                                                                                                                  |                                                                                                                                                                                                 |                                                                                                                                                                                                                                                                                                                                                                               |                                                                                                                                                                                                                                                                                                                                            |
|------------------------------------------------------------------------------------|----------------------------------------------------------------------------------------------------------------------------------|-----------------------------------------------------------------------------|----------------------------------------------------------------------------------------------------------------------------------------------------------------------------------------------------------------------------------------------------------------------------------------------------------------------------------------------------------------------------------|-------------------------------------------------------------------------------------------------------------------------------------------------------------------------------------------------|-------------------------------------------------------------------------------------------------------------------------------------------------------------------------------------------------------------------------------------------------------------------------------------------------------------------------------------------------------------------------------|--------------------------------------------------------------------------------------------------------------------------------------------------------------------------------------------------------------------------------------------------------------------------------------------------------------------------------------------|
| Yuchi (2020) n=678,000 Vancouver, British Columbia, Canada                         | Medical Services Plan Physician Visit and Hospital Discharge data (P)                                                            | 45-84 years Sex not provided for entire sample Race/ethnicity not specified | Greenness (L): NDVI (Location: residential; Boundary: 100m buffer) Time period: adulthood, older adulthood                                                                                                                                                                                                                                                                       | Diagnosis (L): Alzheimer’s disease, non-Alzheimer’s disease; and Parkinson’s disease (source: hospital records, physician visits, prescription history) Time period: adulthood, older adulthood | Multivariable Cox proportion hazards model for non-Alzheimer’s disease and Parkinson’s disease (age, sex, comorbidities, neighborhood household income, neighborhood education, neighborhood ethnicity); Multivariable conditional logistic regression for Alzheimer’s disease (comorbidities, neighborhood household income, neighborhood education, neighborhood ethnicity) | Positive: Greater neighborhood greenness associated with lower hazard ratio for non-Alzheimer’s disease and Parkinson’s disease. Inverse: Greater neighborhood greenness associated with increased odds of Alzheimer’s disease.                                                                                                            |
| Zijlema (2017) n=1,628 Barcelona, Spain Doetinchem, Netherlands Stoke-on-Trent, UK | Positive Health Effects of the Natural Outdoor Environment in Typical Populations in Different Regions in Europe (PHENOTYPE) (P) | Mean: 48 years 54% female Race/ethnicity not specified                      | Greenness (CS): NDVI (Location: residential; Boundary: 100m, 300m, 500m buffer); Other green space measures (CS): Residential distance to natural outdoor environment, self-reported amount of natural outdoor environment; self-reported visits to natural outdoor environment; self-reported time visiting natural outdoor environment Time period: adulthood, later-adulthood | Cognition (CS): Color Trails Test completion time and errors (domain: visual attention/effortful executive processing) Time period: adulthood, older adulthood                                  | Multivariable, multilevel linear and logistic regression (age, sex, education, neighborhood socioeconomic status, time spent away from home, Color Trails Test quality)                                                                                                                                                                                                       | Positive: Greater residential distance to natural outdoor environments associated with greater cognitive test completion time. Null: Residential greenness, percentage residential natural environment, self-reported natural environment visits, and self-reported time spent visiting natural environment not associated with cognition. |

---

Abbreviations: CS = cross-sectional; L = Longitudinal; P = population-based/random sampling; EVI = Enhanced Vegetation Index; UK = United Kingdom  
<sup>a</sup> Full list of papers found in Supplemental Text 1

Supplemental Table 3. Green space and brain health studies including older adults aged ≥65 years

| Citation <sup>a</sup> , sample size, location | Sample source                                                 | Age, sex, race/ethnicity                                                 | Green space measure                                                                                                                                            | Brain health measure                                                                                                                                                                                                                                           | Statistical Method (covariates)                                                               | Associations (positive, inverse, null)                                                                                                                                                                                                           |
|-----------------------------------------------|---------------------------------------------------------------|--------------------------------------------------------------------------|----------------------------------------------------------------------------------------------------------------------------------------------------------------|----------------------------------------------------------------------------------------------------------------------------------------------------------------------------------------------------------------------------------------------------------------|-----------------------------------------------------------------------------------------------|--------------------------------------------------------------------------------------------------------------------------------------------------------------------------------------------------------------------------------------------------|
| Brown (2018)<br>n=249,405<br>Florida, US      | US Medicare Beneficiaries from Miami-Dade County, Florida (P) | Age: 65-111 years (mean: 76)<br>58% female<br>77% non-white<br>23% white | Greenness (CS): NDVI (Location: residential; Boundary: US Census block)<br>Time period: older adulthood                                                        | Diagnosis (CS): Alzheimer's disease (source: US Centers for Medicare and Medicaid Services)<br>Time period: older adulthood                                                                                                                                    | Multivariable, multilevel logistic regression (age, sex, race/ethnicity, neighborhood income) | Positive: Greater neighborhood greenness associated with lower odds of Alzheimer's disease.                                                                                                                                                      |
| Cherrie (2018)                                | See Table 1                                                   |                                                                          |                                                                                                                                                                |                                                                                                                                                                                                                                                                |                                                                                               |                                                                                                                                                                                                                                                  |
| Cherrie (2019)<br>n=281<br>Edinburgh, UK      | Lothian Birth Cohort (P)                                      | Age: 70-76 years<br>Female: 48%<br>Race/ethnicity not specified          | Park space (L): % park space (Location: residential, school, school route; Boundary: 1000m buffer around home, school, school route)<br>Time period: childhood | Cognition (L): Moray House Test No 12 (domain: intelligence)<br>Time period: older adulthood (sex, father's occupation, number per room in childhood household, childhood smoking status, adulthood occupation, alcohol consumption, adulthood smoking status) | Multivariable, multilevel linear regression                                                   | Positive: % park space at ages 11-18 near home, school, and school route associated with less cognitive change from 70 to 76 years.<br>Null: No association between % park space measures at ages 4-11 and cognitive change from 70 to 76 years. |
| Clarke (2012)                                 | See Table 2                                                   |                                                                          |                                                                                                                                                                |                                                                                                                                                                                                                                                                |                                                                                               |                                                                                                                                                                                                                                                  |
| De Keijzer (2018)                             | See Table 2                                                   |                                                                          |                                                                                                                                                                |                                                                                                                                                                                                                                                                |                                                                                               |                                                                                                                                                                                                                                                  |
| Kuhn (2017)<br>n=341<br>Berlin, Germany       | Berlin Aging Study II                                         | 61-82 years (mean: 70)<br>38% female<br>Race/ethnicity not specified     | Green space (CS): Amount of forest and urban green (Location: residential; Boundary: 1km surrounding residence)<br>Time period: older adulthood                | Magnetic Resonance Imaging (CS) of integrity of amygdala, pregenual anterior cingulate cortex (pACC), and dorsolateral prefrontal cortex (DLPFC) determined from                                                                                               | Structural Equation Modeling (SEM) (age, sex, years of education)                             | Positive: Greater amount of forest in neighborhood associated with greater amygdala integrity.<br>Null: No association between amount of forest and pACC or DLPFC integrity, or between amount                                                   |



1  
2  
3  
4  
5  
6  
7  
8  
9  
10  
11  
12  
13  
14  
15  
16  
17  
18  
19  
20  
21  
22  
23  
24  
25  
26  
27  
28  
29  
30  
31  
32  
33  
34  
35  
36  
37  
38  
39  
40  
41  
42  
43  
44  
45  
46  
47

indicators of brain structural integrity (grey matter volume, magnetization transfer ratio, mean diffusivity)  
Time period: Older adulthood

of urban green and any brain measure.

|                                            |                        |                                                                      |                                                                                                     |                                                                                                   |                                                           |                                                                           |
|--------------------------------------------|------------------------|----------------------------------------------------------------------|-----------------------------------------------------------------------------------------------------|---------------------------------------------------------------------------------------------------|-----------------------------------------------------------|---------------------------------------------------------------------------|
| Wang (2017)<br>n=3,544<br>Hong Kong, China | Community based-cohort | ≥65 years (median: 72)<br>50% female<br>Race/ethnicity not specified | Greenness (CS): NDVI (Location: residential; boundary: 300m buffer)<br>Time period: older adulthood | Cognition (CS): Mini Mental State Exam (domain: global cognition)<br>Time period: older adulthood | Spearman's correlation coefficients (unadjusted analysis) | Null: no correlation between neighborhood greenness and global cognition. |
|--------------------------------------------|------------------------|----------------------------------------------------------------------|-----------------------------------------------------------------------------------------------------|---------------------------------------------------------------------------------------------------|-----------------------------------------------------------|---------------------------------------------------------------------------|

|                            |                                                                  |                                                                          |                                                                                                                                                                 |                                                                                                                                                                                                                                                    |                                                                                                                                  |                                                                                                                                                        |
|----------------------------|------------------------------------------------------------------|--------------------------------------------------------------------------|-----------------------------------------------------------------------------------------------------------------------------------------------------------------|----------------------------------------------------------------------------------------------------------------------------------------------------------------------------------------------------------------------------------------------------|----------------------------------------------------------------------------------------------------------------------------------|--------------------------------------------------------------------------------------------------------------------------------------------------------|
| Wu (2015)<br>n=2,424<br>UK | Medical Research Council Cognitive Function and Ageing Study (P) | Age ≥74 years (Mean: 82)<br>60.7% female<br>Race/ethnicity not specified | Green space (CS): % green space/private gardens (Location: residential; Boundary: Lower – Layer Super Output Area for postcode)<br>Time period: older adulthood | Cognitive status (CS): Cognitive impairment (source: Mini Mental State Exam ≤25)<br>Diagnosis (CS): dementia (source: Geriatric Mental Status and Automatic Geriatric Examination for Computer Assisting Taxonomy)<br>Time period: older adulthood | Multivariable, multilevel logistic regression (age, gender, education, social class, number chronic illnesses, area deprivation) | Inverse: Individuals living with highest quartile of neighborhood green space (versus lowest) had increased odds of cognitive impairment and dementia. |
|----------------------------|------------------------------------------------------------------|--------------------------------------------------------------------------|-----------------------------------------------------------------------------------------------------------------------------------------------------------------|----------------------------------------------------------------------------------------------------------------------------------------------------------------------------------------------------------------------------------------------------|----------------------------------------------------------------------------------------------------------------------------------|--------------------------------------------------------------------------------------------------------------------------------------------------------|

|                            |                                                                     |                                                                |                                                                                                                                                                 |                                                                                                                                                                                                                                                    |                                                                                                                    |                                                                                                                                                                                                                                           |
|----------------------------|---------------------------------------------------------------------|----------------------------------------------------------------|-----------------------------------------------------------------------------------------------------------------------------------------------------------------|----------------------------------------------------------------------------------------------------------------------------------------------------------------------------------------------------------------------------------------------------|--------------------------------------------------------------------------------------------------------------------|-------------------------------------------------------------------------------------------------------------------------------------------------------------------------------------------------------------------------------------------|
| Wu (2017)<br>n=7,505<br>UK | Medical Research Council Cognitive Function and Ageing Study II (P) | Median: 74 years<br>54% female<br>Race/ethnicity not specified | Green space (CS): % green space/private gardens (Location: residential; Boundary: Lower – Layer Super Output Area for postcode)<br>Time period: older adulthood | Cognitive status (CS): Cognitive impairment (source: Mini Mental State Exam ≤25)<br>Diagnosis (CS): dementia (source: Geriatric Mental Status and Automatic Geriatric Examination for Computer Assisting Taxonomy)<br>Time period: older adulthood | Multivariable, multilevel logistic regression (age, gender, education, number chronic illnesses, area deprivation) | Inverse: Individuals living with highest quintile of neighborhood green space/private gardens (versus lowest) had increased odds of cognitive impairment.<br>Null: No associations between neighborhood green space and odds of dementia. |
|----------------------------|---------------------------------------------------------------------|----------------------------------------------------------------|-----------------------------------------------------------------------------------------------------------------------------------------------------------------|----------------------------------------------------------------------------------------------------------------------------------------------------------------------------------------------------------------------------------------------------|--------------------------------------------------------------------------------------------------------------------|-------------------------------------------------------------------------------------------------------------------------------------------------------------------------------------------------------------------------------------------|

|    |              |                |                |                         |                       |                         |                                 |
|----|--------------|----------------|----------------|-------------------------|-----------------------|-------------------------|---------------------------------|
| 1  |              |                |                |                         |                       |                         |                                 |
| 2  |              |                |                |                         |                       |                         |                                 |
| 3  | Yu (2018)    | Mr. and Ms. Os | Mean: 72 years | Greenness (CS): NDVI    | Cognition (CS): Mini  | Multivariable           | Null: Greater neighborhood      |
| 4  | n=3,240      | (Hong Kong)    | 49% female     | (Location: residential; | Mental State Exam     | regression path         | greenness not directly          |
| 5  | Hong Kong,   | study          | Race/ethnicity | Boundary: 300m buffer)  | (domain: global       | analysis (age, sex,     | associated with cognition.      |
| 6  | China        |                | not specified  | Time period: older      | cognition)            | marital status,         |                                 |
| 7  |              |                |                | adulthood               | Time period: older    | socioeconomic           |                                 |
| 8  |              |                |                |                         | adulthood             | status, alcohol intake, |                                 |
| 9  |              |                |                |                         |                       | diet quality, baseline  |                                 |
| 10 | Yuchi (2020) | See Table 2    |                |                         |                       | frailty status)         |                                 |
| 11 |              |                |                |                         |                       |                         |                                 |
| 12 | Zhu (2020)   | Chinese        | Mean: 80 years | Greenness (L): NDVI     | Cognitive status (L): | Multivariable logistic  | Positive: Individuals living in |
| 13 | n=6,994      | Longitudinal   | 51% female     | (Longitudinal: no;      | Cognitive impairment  | regression using        | highest quartile of             |
| 14 | China        | Healthy        | Race/ethnicity | Location: residential;  | (source: Mini Mental  | generalized             | neighborhood greenness          |
| 15 |              | Longevity      | not specified  | Boundary: 500m buffer)  | State Exam <24)       | estimating equations    | had lower odds of cognitive     |
| 16 |              | Survey         |                | Time period: older      | Time period: older    | (age, gender, marital   | impairment.                     |
| 17 |              | (CLHLS) (P)    |                | adulthood               | adulthood             | status, urban/rural     |                                 |
| 18 |              |                |                |                         |                       | residence, education,   |                                 |
| 19 |              |                |                |                         |                       | occupation, financial   |                                 |
| 20 |              |                |                |                         |                       | support, social and     |                                 |
| 21 |              |                |                |                         |                       | leisure activity,       |                                 |
| 22 |              |                |                |                         |                       | smoking status,         |                                 |
| 23 | Zijlema      | See Table 2    |                |                         |                       | alcohol consumption,    |                                 |
| 24 | (2017)       |                |                |                         |                       | and physical activity)  |                                 |

Abbreviations: CS = cross-sectional; L = longitudinal; P = population-based/random sampling; UK = United Kingdom

<sup>a</sup> Full list of papers found in Supplemental Text 1

1  
2  
3  
4  
5  
6  
7  
8  
9  
10  
11  
12  
13  
14  
15  
16  
17  
18  
19  
20  
21  
22  
23  
24  
25  
26  
27  
28  
29  
30  
31  
32  
33  
34  
35  
36  
37  
38  
39  
40  
41  
42  
43  
44  
45  
46  
47

Supplemental Table 4. Studies examining effect modification and mediation

| Citation <sup>a</sup> | Effect modifier examined                                                         | Effect modification findings                                                                                                                                                                                                                                                                                                                     | Mediator examined                                                     | Mediation findings                                                                                                                                                                                                           |
|-----------------------|----------------------------------------------------------------------------------|--------------------------------------------------------------------------------------------------------------------------------------------------------------------------------------------------------------------------------------------------------------------------------------------------------------------------------------------------|-----------------------------------------------------------------------|------------------------------------------------------------------------------------------------------------------------------------------------------------------------------------------------------------------------------|
| Brown (2018)          | Neighborhood income level                                                        | No effect modification                                                                                                                                                                                                                                                                                                                           | None                                                                  | N/A                                                                                                                                                                                                                          |
| Cherrie (2018)        | Sex<br>APOE ε4 allele<br>Adult occupational class<br>Adulthood park availability | Association between greater childhood park availability and slower cognitive decline from 70-76 years strongest in those with greater adulthood park availability, and these associations were stronger for women, APOE ε4 non-carriers, and individuals who had skilled/unskilled jobs (versus professional).                                   | None                                                                  | N/A                                                                                                                                                                                                                          |
| Cherrie (2019)        | Sex<br>Traffic Accident Density                                                  | No effect modification by sex. Association between childhood park activity space was not associated with cognitive aging differentially by traffic accident density; however, association between greater adolescent park activity space and better cognitive aging was restricted to those with lower traffic accident density (versus higher). | None                                                                  | N/A                                                                                                                                                                                                                          |
| Clarke (2012)         | None                                                                             | N/A                                                                                                                                                                                                                                                                                                                                              | Physical activity<br>Social interaction                               | No mediation                                                                                                                                                                                                                 |
| Dadvand (2015)        | Maternal education<br>Neighborhood SES                                           | Not effect modification                                                                                                                                                                                                                                                                                                                          | Traffic Related Air Pollution (elemental carbon, residential indoors) | Elemental carbon explained 20-65% of associations between school greenness and cognitive changes and resulted in changed (no longer significant) associations between school greenness and working memory and attentiveness. |
| Dadvand (2017)        | Cohort location (Sabadell versus Valencia)                                       | No effect modification                                                                                                                                                                                                                                                                                                                           | None                                                                  | N/A                                                                                                                                                                                                                          |

|    |               |                               |                                                    |                                  |                        |
|----|---------------|-------------------------------|----------------------------------------------------|----------------------------------|------------------------|
| 1  |               |                               |                                                    |                                  |                        |
| 2  |               |                               |                                                    |                                  |                        |
| 3  | De Keijzer    | Sex                           | Association between greater greenness and          | Physical activity                | No mediation           |
| 4  | (2018)        | Education                     | slower decline in global cognition found for       | Air pollution                    |                        |
| 5  |               | Area level deprivation        | women but not men, stronger in those with          | Social support                   |                        |
| 6  |               |                               | higher education (versus lower), and stronger      |                                  |                        |
| 7  |               |                               | among those with higher area deprivation           |                                  |                        |
| 8  |               |                               | (versus lower).                                    |                                  |                        |
| 9  | Dzhambov      | None                          | N/A                                                | Waist circumference              | Lower waist            |
| 10 | (2019)        |                               |                                                    | Systolic blood pressure          | circumference mediated |
| 11 |               |                               |                                                    | Total cholesterol                | association between    |
| 12 |               |                               |                                                    | Glucose                          | greater greenness and  |
| 13 |               |                               |                                                    | Air pollution (NO <sub>2</sub> ) | higher CERAD-NB score  |
| 14 |               |                               |                                                    |                                  | (global cognition).    |
| 15 | Flouri (2019) | Neighborhood deprivation      | No effect modification                             | None                             | N/A                    |
| 16 |               | Residential stability         |                                                    |                                  |                        |
| 17 | Hystad        | Education                     | Adjusted models were stratified but no statistical | None                             | N/A                    |
| 18 | (2019)        | Sex                           | tests for differences between strata (i.e., no     |                                  |                        |
| 19 |               | Age                           | interaction terms used).                           |                                  |                        |
| 20 |               | Household income              | Associations appeared to vary by sex, age, and     |                                  |                        |
| 21 |               | Race                          | education.                                         |                                  |                        |
| 22 |               | Marital status                |                                                    |                                  |                        |
| 23 |               | Years in current residence    |                                                    |                                  |                        |
| 24 |               | City                          |                                                    |                                  |                        |
| 25 | Liao          | Household income              | Greater greenness associated with better           | Traffic related air pollution    | No mediation           |
| 26 | (2019)        | Pre-pregnancy body mass index | cognition among children of mothers with pre-      | (PM2.5)                          |                        |
| 27 |               | Infant sex                    | pregnancy BMI<24 kg/m <sup>2</sup> .               | Physical outdoor activities      |                        |
| 28 |               |                               |                                                    |                                  |                        |
| 29 |               |                               |                                                    |                                  |                        |
| 30 | Wu            | Urbanicity                    | Among those living conurbation areas with          | None                             | N/A                    |
| 31 | (2017)        |                               | higher % green space, lower odds of cognitive      |                                  |                        |
| 32 |               |                               | impairment. Among those living in rural areas,     |                                  |                        |
| 33 |               |                               | those with higher % green space associated with    |                                  |                        |
| 34 |               |                               | greater odds of cognitive impairment.              |                                  |                        |
| 35 |               |                               |                                                    |                                  |                        |
| 36 |               |                               |                                                    |                                  |                        |
| 37 | Yu            | None                          | N/A                                                | Physical activity                | Physical activity      |
| 38 | (2018)        |                               |                                                    | Depression                       | mediated association   |
| 39 |               |                               |                                                    |                                  | between greater        |
| 40 |               |                               |                                                    |                                  | greenness and global   |
| 41 |               |                               |                                                    |                                  | cognition.             |
| 42 |               |                               |                                                    |                                  |                        |
| 43 |               |                               |                                                    |                                  |                        |
| 44 |               |                               |                                                    |                                  |                        |
| 45 |               |                               |                                                    |                                  |                        |
| 46 |               |                               |                                                    |                                  |                        |
| 47 |               |                               |                                                    |                                  |                        |

1  
2  
3  
4  
5  
6  
7  
8  
9  
10  
11  
12  
13  
14  
15  
16  
17  
18  
19  
20  
21  
22  
23  
24  
25  
26  
27  
28  
29  
30  
31  
32  
33  
34  
35  
36  
37  
38  
39  
40  
41  
42  
43  
44  
45  
46  
47

|                |                                                                                         |                                                                                                                                                                                                                                                                |                                                                                                                                                                          |              |
|----------------|-----------------------------------------------------------------------------------------|----------------------------------------------------------------------------------------------------------------------------------------------------------------------------------------------------------------------------------------------------------------|--------------------------------------------------------------------------------------------------------------------------------------------------------------------------|--------------|
| Zhu (2020)     | Age (65-79 years; 80+ years)<br>APOE genotype ( $\epsilon$ 4 carriers vs. non-carriers) | Greater greenspace associated with lower odds of cognitive impairment among 65-79 year olds but not 80+ year olds, and among APOE $\epsilon$ 4 non-carriers but not $\epsilon$ 4 carriers. These are stratified results, no interaction terms had $p < 0.05$ . | None                                                                                                                                                                     | N/A          |
| Zijlema (2017) | None                                                                                    | N/A                                                                                                                                                                                                                                                            | Physical activity<br>Social interaction<br>Loneliness<br>Neighborhood social cohesion<br>Perceived mental health<br>Traffic noise annoyance<br>Worry about air pollution | No mediation |

Abbreviations: APOE = apolipoprotein E; BMI = body mass index; PM = particulate matter

<sup>a</sup> Full list of papers found in Supplemental Text 1

For Peer review only

## Preferred Reporting Items for Systematic reviews and Meta-Analyses extension for Scoping Reviews (PRISMA-ScR) Checklist

| SECTION                                               | ITEM | PRISMA-ScR CHECKLIST ITEM                                                                                                                                                                                                                                                                                  | REPORTED ON PAGE #      |
|-------------------------------------------------------|------|------------------------------------------------------------------------------------------------------------------------------------------------------------------------------------------------------------------------------------------------------------------------------------------------------------|-------------------------|
| <b>TITLE</b>                                          |      |                                                                                                                                                                                                                                                                                                            |                         |
| Title                                                 | 1    | Identify the report as a scoping review.                                                                                                                                                                                                                                                                   | 1                       |
| <b>ABSTRACT</b>                                       |      |                                                                                                                                                                                                                                                                                                            |                         |
| Structured summary                                    | 2    | Provide a structured summary that includes (as applicable): background, objectives, eligibility criteria, sources of evidence, charting methods, results, and conclusions that relate to the review questions and objectives.                                                                              | 2                       |
| <b>INTRODUCTION</b>                                   |      |                                                                                                                                                                                                                                                                                                            |                         |
| Rationale                                             | 3    | Describe the rationale for the review in the context of what is already known. Explain why the review questions/objectives lend themselves to a scoping review approach.                                                                                                                                   | 5-6                     |
| Objectives                                            | 4    | Provide an explicit statement of the questions and objectives being addressed with reference to their key elements (e.g., population or participants, concepts, and context) or other relevant key elements used to conceptualize the review questions and/or objectives.                                  | 6                       |
| <b>METHODS</b>                                        |      |                                                                                                                                                                                                                                                                                                            |                         |
| Protocol and registration                             | 5    | Indicate whether a review protocol exists; state if and where it can be accessed (e.g., a Web address); and if available, provide registration information, including the registration number.                                                                                                             | N/A                     |
| Eligibility criteria                                  | 6    | Specify characteristics of the sources of evidence used as eligibility criteria (e.g., years considered, language, and publication status), and provide a rationale.                                                                                                                                       | 7-8                     |
| Information sources*                                  | 7    | Describe all information sources in the search (e.g., databases with dates of coverage and contact with authors to identify additional sources), as well as the date the most recent search was executed.                                                                                                  | 7-8                     |
| Search                                                | 8    | Present the full electronic search strategy for at least 1 database, including any limits used, such that it could be repeated.                                                                                                                                                                            | 7-8, Suppl Fig 1, Fig 1 |
| Selection of sources of evidence†                     | 9    | State the process for selecting sources of evidence (i.e., screening and eligibility) included in the scoping review.                                                                                                                                                                                      | 7-8                     |
| Data charting process‡                                | 10   | Describe the methods of charting data from the included sources of evidence (e.g., calibrated forms or forms that have been tested by the team before their use, and whether data charting was done independently or in duplicate) and any processes for obtaining and confirming data from investigators. | 8                       |
| Data items                                            | 11   | List and define all variables for which data were sought and any assumptions and simplifications made.                                                                                                                                                                                                     | 8                       |
| Critical appraisal of individual sources of evidence§ | 12   | If done, provide a rationale for conducting a critical appraisal of included sources of evidence; describe the methods used and how this information was used in any data synthesis (if appropriate).                                                                                                      | n/a                     |



| SECTION                                       | ITEM | PRISMA-ScR CHECKLIST ITEM                                                                                                                                                                       | REPORTED ON PAGE #         |
|-----------------------------------------------|------|-------------------------------------------------------------------------------------------------------------------------------------------------------------------------------------------------|----------------------------|
| Synthesis of results                          | 13   | Describe the methods of handling and summarizing the data that were charted.                                                                                                                    | 8                          |
| <b>RESULTS</b>                                |      |                                                                                                                                                                                                 |                            |
| Selection of sources of evidence              | 14   | Give numbers of sources of evidence screened, assessed for eligibility, and included in the review, with reasons for exclusions at each stage, ideally using a flow diagram.                    | Fig 1                      |
| Characteristics of sources of evidence        | 15   | For each source of evidence, present characteristics for which data were charted and provide the citations.                                                                                     | 8-14                       |
| Critical appraisal within sources of evidence | 16   | If done, present data on critical appraisal of included sources of evidence (see item 12).                                                                                                      | n/a                        |
| Results of individual sources of evidence     | 17   | For each included source of evidence, present the relevant data that were charted that relate to the review questions and objectives.                                                           | Table 1-3, Suppl table 1-4 |
| Synthesis of results                          | 18   | Summarize and/or present the charting results as they relate to the review questions and objectives.                                                                                            | Table 1-3, Suppl table 1-4 |
| <b>DISCUSSION</b>                             |      |                                                                                                                                                                                                 |                            |
| Summary of evidence                           | 19   | Summarize the main results (including an overview of concepts, themes, and types of evidence available), link to the review questions and objectives, and consider the relevance to key groups. | 14-19                      |
| Limitations                                   | 20   | Discuss the limitations of the scoping review process.                                                                                                                                          | 20                         |
| Conclusions                                   | 21   | Provide a general interpretation of the results with respect to the review questions and objectives, as well as potential implications and/or next steps.                                       | 21                         |
| <b>FUNDING</b>                                |      |                                                                                                                                                                                                 |                            |
| Funding                                       | 22   | Describe sources of funding for the included sources of evidence, as well as sources of funding for the scoping review. Describe the role of the funders of the scoping review.                 | 4                          |

JBIG = Joanna Briggs Institute; PRISMA-ScR = Preferred Reporting Items for Systematic reviews and Meta-Analyses extension for Scoping Reviews.

\* Where *sources of evidence* (see second footnote) are compiled from, such as bibliographic databases, social media platforms, and Web sites.

† A more inclusive/heterogeneous term used to account for the different types of evidence or data sources (e.g., quantitative and/or qualitative research, expert opinion, and policy documents) that may be eligible in a scoping review as opposed to only studies. This is not to be confused with *information sources* (see first footnote).

‡ The frameworks by Arksey and O'Malley (6) and Levac and colleagues (7) and the JBI guidance (4, 5) refer to the process of data extraction in a scoping review as data charting.

§ The process of systematically examining research evidence to assess its validity, results, and relevance before using it to inform a decision. This term is used for items 12 and 19 instead of "risk of bias" (which is more applicable to systematic reviews of interventions) to include and acknowledge the various sources of evidence that may be used in a scoping review (e.g., quantitative and/or qualitative research, expert opinion, and policy document).

From: Tricco AC, Lillie E, Zarin W, O'Brien KK, Colquhoun H, Levac D, et al. PRISMA Extension for Scoping Reviews (PRISMA-ScR): Checklist and Explanation. *Ann Intern Med.* 2018;169:467–473. doi: [10.7326/M18-0850](https://doi.org/10.7326/M18-0850).



# BMJ Open

## Outdoor green space exposure and brain health measures related to Alzheimer's disease: A rapid review

|                                 |                                                                                                                                        |
|---------------------------------|----------------------------------------------------------------------------------------------------------------------------------------|
| Journal:                        | <i>BMJ Open</i>                                                                                                                        |
| Manuscript ID                   | bmjopen-2020-043456.R2                                                                                                                 |
| Article Type:                   | Original research                                                                                                                      |
| Date Submitted by the Author:   | 17-Mar-2021                                                                                                                            |
| Complete List of Authors:       | Besser, Lilah ; Florida Atlantic University, Institute for Human Health and Disease Intervention                                       |
| <b>Primary Subject Heading</b>: | Public health                                                                                                                          |
| Secondary Subject Heading:      | Geriatric medicine                                                                                                                     |
| Keywords:                       | Delirium & cognitive disorders < PSYCHIATRY, Old age psychiatry < PSYCHIATRY, PUBLIC HEALTH, PREVENTIVE MEDICINE, Dementia < NEUROLOGY |
|                                 |                                                                                                                                        |

SCHOLARONE™  
Manuscripts



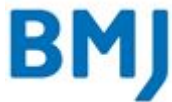

I, the Submitting Author has the right to grant and does grant on behalf of all authors of the Work (as defined in the below author licence), an exclusive licence and/or a non-exclusive licence for contributions from authors who are: i) UK Crown employees; ii) where BMJ has agreed a CC-BY licence shall apply, and/or iii) in accordance with the terms applicable for US Federal Government officers or employees acting as part of their official duties; on a worldwide, perpetual, irrevocable, royalty-free basis to BMJ Publishing Group Ltd ("BMJ") its licensees and where the relevant Journal is co-owned by BMJ to the co-owners of the Journal, to publish the Work in this journal and any other BMJ products and to exploit all rights, as set out in our [licence](#).

The Submitting Author accepts and understands that any supply made under these terms is made by BMJ to the Submitting Author unless you are acting as an employee on behalf of your employer or a postgraduate student of an affiliated institution which is paying any applicable article publishing charge ("APC") for Open Access articles. Where the Submitting Author wishes to make the Work available on an Open Access basis (and intends to pay the relevant APC), the terms of reuse of such Open Access shall be governed by a Creative Commons licence – details of these licences and which [Creative Commons](#) licence will apply to this Work are set out in our licence referred to above.

Other than as permitted in any relevant BMJ Author's Self Archiving Policies, I confirm this Work has not been accepted for publication elsewhere, is not being considered for publication elsewhere and does not duplicate material already published. I confirm all authors consent to publication of this Work and authorise the granting of this licence.

1  
2  
3 **Outdoor green space exposure and brain health measures related to Alzheimer's**  
4 **disease: A rapid review**  
5

6 Lilah M. Besser, PhD MSPH<sup>a</sup>  
7

8 <sup>a</sup> Institute for Human Health and Disease Intervention (I-HEALTH), School of Urban and  
9 Regional Planning, Florida Atlantic University, Boca Raton, Florida, US, [lbesser@fau.edu](mailto:lbesser@fau.edu)  
10

11 **Corresponding author:**

12 Lilah Besser  
13 777 Glades Road, SO-284H  
14 Institute for Human Health and Disease Intervention  
15 School of Urban and Regional Planning  
16 Florida Atlantic University  
17 Boca Raton, FL 33431  
18 1-561-297-0614  
19 [lbesser@fau.edu](mailto:lbesser@fau.edu)  
20  
21  
22

23 Abstract: 277

24 Text: 5,390

25 Tables: 4

26 Figures: 4

27 Supplemental data: 1 figure, 1 text, 4 tables  
28  
29  
30  
31  
32  
33  
34  
35  
36  
37  
38  
39  
40  
41  
42  
43  
44  
45  
46  
47  
48  
49  
50  
51  
52  
53  
54  
55  
56  
57  
58  
59  
60

1  
2  
3 **Data Availability Statement**  
4

5 De-identified data (i.e., search results from the databases) are available upon request of the  
6 author, Dr. Besser ([lbesser@fau.edu](mailto:lbesser@fau.edu)). Any re-use or sharing of these data require Dr. Besser's  
7 approval.  
8  
9  
10  
11  
12  
13  
14  
15  
16  
17  
18  
19  
20  
21  
22  
23  
24  
25  
26  
27  
28  
29  
30  
31  
32  
33  
34  
35  
36  
37  
38  
39  
40  
41  
42  
43  
44  
45  
46  
47  
48  
49  
50  
51  
52  
53  
54  
55  
56  
57  
58  
59  
60

For peer review only

## Abstract

**Objectives:** Summarize studies of outdoor green space exposure and brain health measures related to Alzheimer's disease and related disorders (ADRD), and determine scientific gaps for future research.

**Design:** Rapid review of primary research studies.

**Methods and outcomes:** PubMed, Embase, and Web of Science Core Collection were searched for articles meeting the criteria published on/before February 13, 2020. The review excluded papers not in English, focused on transient states (e.g., mental fatigue), or not using individual-level measures of brain health (e.g., average school test scores). Brain health measures of interest included cognitive function, clinical diagnosis of cognitive impairment/dementia/ADRD, and brain biomarkers such as those from magnetic resonance imaging (MRI), measures typically associated with ADRD risk and disease progression.

**Results:** Twenty-two papers were published from 2012-2020, 36% on <18 year-olds, 32% on 18-64 year-olds, and 59% on ≥65 year-olds. Sixty-four percent defined green space based on the normalized difference vegetation index ("greenness"/healthy vegetation) and 68% focused on cognitive measures of brain health (e.g., memory). Seventeen studies (77%) found green space-brain health associations (14 positive, four inverse). Greater greenness/green space was positively associated various cognitive domains in 10 studies and with MRI outcomes (regional brain volumes, cortical thickness, amygdala integrity) in three studies. Greater neighborhood greenness was associated with lower odds/risk of cognitive impairment/ADRD in some studies but increased odds/risk in others (n=4 studies).

**Conclusions:** Published studies suggest positive green space-brain health associations across the life course, but the methods and cohorts were limited and heterogeneous. Future research using racially/ethnically and geographically diverse cohorts, life course methods, and more specific green space and brain health measures (e.g., time spent in green spaces, ADRD biomarkers) will strengthen evidence for causal associations.

**Keywords:** greenspaces, park, greenness, cognition, cognitive, dementia, MRI, ADRD

### Strengths and limitations of this study

- Three major databases covering biomedical, psychological, environmental, and social science topics and a range of keywords were searched to find pertinent studies regarding associations between green space exposure and Alzheimer's disease and related disorders brain health measures.
- Published literature reviews on green space and health and reference lists from the final sample of papers were reviewed to help ensure pertinent papers were included.
- This study was limited to a single reviewer and thus, the methods used to search, screen, select, and chart the final sample of papers could not be duplicated/adjudicated by additional reviewers.
- As a rapid review, this study was not aimed at providing a quantitative evaluation of the evidence or risk of bias, and may have missed papers that would have been ascertained if additional reviewers were available.

## Funding

Dr. Besser is supported by National Institutes of Health/National Institute on Aging award K01AG063895.

## Competing Interests

The author has no competing interests to declare.

## Introduction

Nature contact involves time spent in green spaces (e.g., gardens, parks, forests) and blue spaces (e.g., lakes, rivers) where people live, work, and play. Preliminary studies suggest associations between nature contact and health including reductions in depression, anxiety, and cardiovascular risk factors; improved attention and mood; and increased physical activity.<sup>1</sup> Studies also suggest associations with brain health across the life course.<sup>2-8</sup> For instance, greater neighborhood greenness (i.e., healthy vegetation) has been associated with lower odds of Alzheimer's disease (AD) in older adults.<sup>9</sup>

AD and related disorders (ADRD) affect approximately 50 million people worldwide, and 15% of older adults have mild cognitive impairment, a frequent antecedent to dementia.<sup>10 11</sup> Older age, lower educational attainment, and genetics (e.g., apolipoprotein E  $\epsilon$ 4 allele carriers) are some of the strongest predictors of AD risk and late-life cognitive decline.<sup>12</sup> Clinicians diagnose AD using biomarkers and/or cognitive assessments. Diagnostic biomarkers include cerebrospinal fluid (CSF) or positron emission (PET) scan biomarkers measuring brain amyloid beta and phosphorylated tau (p-tau), the proteins responsible for AD neuropathology (i.e., plaques and tangles).<sup>13 14</sup> Cognitive tests for AD typically evaluate memory of personal events (i.e., episodic memory), the hallmark cognitive domain affected early in the disease course.<sup>15</sup> Episodic memory problems are correlated with atrophy of the hippocampus, and thus, magnetic resonance imaging (MRI) brain biomarkers such as hippocampal atrophy help support AD diagnosis and predict AD incidence and disease progression.<sup>16</sup> Other dementia disorders typically affect different cognitive domains/brain regions in the early stages of disease, and later stages of ADRD can affect additional cognitive domains and brain regions.<sup>15</sup>

1  
2  
3 The psychological and financial burden of ADRD on patients and families is substantial.<sup>17 18</sup>  
4  
5 Health care systems are ill prepared to deal with the increase in ADRD prevalence  
6  
7 accompanying the rapidly rising population of older adults<sup>19</sup>, and no effective treatments are  
8  
9 currently available. Therefore, an accumulating body of research has focused on individual- and  
10  
11 community-level interventions that may help prevent or delay ADRD. Provided there is  
12  
13 supporting evidence, neighborhood green space is one such community-level feature that may  
14  
15 be promoted to improve lifelong brain health. Healthy brain development during childhood and  
16  
17 maintenance of brain health throughout adulthood, assisted by living near health-enhancing  
18  
19 green spaces, may help reduce ADRD risk.  
20  
21  
22  
23

24 Green space exposure may benefit brain health through a number of pathways.<sup>1 20</sup> They provide  
25  
26 enriching, physical activity promoting, and stress reducing environments that consequently may  
27  
28 be associated with better brain health by affecting cerebral blood flow, angiogenesis, vascular  
29  
30 integrity, cell proliferation/survival, vascular dysregulation, and/or inflammation.<sup>21-23 24 25</sup> Green  
31  
32 space exposure may reduce stress and mental fatigue and improve attention, consistent with  
33  
34 the Stress Recovery Theory and Attention Restoration Theory.<sup>26-28</sup> Studies are available to  
35  
36 support both theories. For instance, living within one mile of green spaces and visiting green  
37  
38 spaces have been associated with experiencing less stress<sup>29</sup>, and gardening has been found to  
39  
40 reduce levels of salivary cortisol, a stress hormone.<sup>30</sup> In adults, mood, restoration, and  
41  
42 sustained attention were improved after participating in a nature walk intervention in urban and  
43  
44 rural locales.<sup>28</sup> These psychological benefits over the long term may additionally benefit mental  
45  
46 health (e.g., anxiety, depression), factors associated with brain health including ADRD risk.<sup>31</sup>  
47  
48 Microbial and antigenic exposures from nature contact<sup>32</sup>, especially during childhood, may affect  
49  
50 lifelong immune function and contribute to healthy microbiomes, which have been associated  
51  
52 with mental health and AD.<sup>33-35</sup> Green spaces provide areas for recreational exercise. Exposure  
53  
54 and access to natural places have been associated with greater physical activity in children  
55  
56  
57  
58  
59  
60



1  
2  
3 through older adults<sup>36 37</sup>, and obtaining greater physical activity has been associated with  
4 reduced brain atrophy, cognitive decline, and ADRD risk.<sup>38 39</sup> Natural areas provide spaces for  
5 social gathering and engagement.<sup>40</sup> Higher levels of social engagement have been associated  
6 with better cognitive function and reduced AD risk.<sup>41 42</sup> Lastly, natural areas and parks have  
7 been associated with lower levels of harmful air pollutants, including PM<sub>10</sub> and NO<sub>2</sub><sup>43 44</sup> that  
8 have been associated with worse cognition and greater ADRD risk.<sup>45</sup> The mechanisms by  
9 which air pollution affects the brain have been hypothesized to be direct and/or indirect (e.g.,  
10 systemic inflammation, adsorbed compounds).<sup>46</sup>  
11  
12  
13  
14  
15  
16  
17  
18  
19  
20  
21

22 The budding and cross-disciplinary field of research on green spaces and ADRD/brain health  
23 will benefit from a review of pertinent studies spanning multiple disciplines. Literature used to  
24 inform primary research tends to be siloed to a researcher's area of expertise or based on  
25 limited or discipline-specific search terms. Given the nascent state of green space and ADRD-  
26 related brain health research and the lack of published literature reviews focused on the topic,  
27 this rapid review employed scoping aims. Rapid reviews are increasingly used in research to  
28 address the need for more readily available summaries of available evidence that cannot be  
29 achieved through the lengthy and resource-intensive process of systematic reviews.<sup>47</sup> Scoping  
30 reviews are useful in summarizing new topics of research, findings for a broader set of health  
31 outcomes, or topics that may not have enough evidence amassed to assess the weight of  
32 evidence or risk of bias.<sup>47-49</sup>  
33  
34  
35  
36  
37  
38  
39  
40  
41  
42  
43  
44  
45  
46

47 The number of studies on green space and health has risen dramatically in the last decade<sup>50</sup>,  
48 but it remains unclear how many studied brain health outcomes. Therefore, consistent with the  
49 major goals of a scoping review<sup>48 49 51 52</sup>, this rapid review aimed: 1) to summarize the extant  
50 literature on green space-brain health associations across the life course, potentially providing  
51 impetus for future systematic reviews, and 2) to identify knowledge gaps to inform future  
52  
53  
54  
55  
56  
57  
58  
59  
60

1  
2  
3 research. The primary intent was to identify and describe current evidence for benefits to  
4 cognition and brain structure/function due to green space exposure. These benefits may  
5 develop and persist in early- and mid-life to reduce ADRD risk in late-life.  
6  
7  
8  
9

## 10 11 **Methods**

### 12 **Patient and Public Involvement**

13  
14 Patients and the public were not involved as this study focuses on a review of published papers  
15 with no analysis of participant data.  
16  
17  
18  
19  
20  
21

### 22 **Identification and study selection**

23  
24 A single reviewer was available for this study. On February 13, 2020, PubMed, Web of Science  
25 Core Collection, and Embase were queried for the following keywords: “greenspace or green  
26 space or greenness or parks or park or park space or parkspace” and “cognition or cognitive or  
27 memory or brain aging or Alzheimer or Alzheimer’s or dementia or cognitive impairment”. To  
28 help ensure the February 13 review did not miss pertinent papers, a second search of the three  
29 databases was performed on July 18, 2020, for the following keywords: “neighborhood  
30 environment or wilderness or greenery or natural space or natural environment or public garden  
31 or recreational resource or NDVI or normalized difference vegetation index or built environment  
32 or open space or woodland” and “brain volume or brain atrophy or neurodegenerative disease  
33 or Alzheimer biomarker or cognition or cognitive or memory or brain aging or Alzheimer or  
34 Alzheimer’s or dementia or cognitive impairment”. The keywords searched reflected the brain  
35 health measures of interest that are typically associated with ADRD risk/disease progression,  
36 including cognitive function, clinical diagnosis of cognitive impairment/dementia/ADRD, and  
37 biomarkers such as those from brain imaging (e.g., MRI).  
38  
39  
40  
41  
42  
43  
44  
45  
46  
47  
48  
49  
50  
51  
52  
53  
54  
55  
56  
57  
58  
59  
60

1  
2  
3 The July 18, 2020 search was restricted to papers published on or before February 13, 2020, to  
4 be consistent with the original search. A limitation of the July 18, 2020 search was the restriction  
5 to a search of titles in Web of Science. A full text search led to 8,574 papers that could not be  
6 feasibly reviewed based on available time and resources (i.e., this is a rapid review). Of note,  
7 the final list of included papers from the February 13 search was ascertained either from the  
8 search of PubMed and Embase or the review of resulting titles from the search of full texts in  
9 Web of Science (i.e., not from a full text review of papers in Web of Science). This suggests that  
10 the July search of titles in Web of Science was unlikely to have missed pertinent papers, but the  
11 possibility remains. A detailed description of the search strategy is provided in Supplemental  
12 Figure 1.  
13  
14  
15  
16  
17  
18  
19  
20  
21  
22  
23  
24  
25

26 Titles were screened for topics definitely or possibly related to green space and ADRD-related  
27 brain health. Titles potentially related were included in the abstract review (e.g., green space  
28 and child development, neighborhood environment and Alzheimer's disease, built environments  
29 and aging, outdoors and mental health). After review, abstracts that moved on to full text review  
30 had exposures/outcomes directly pertinent to this study, focused on associations between green  
31 space and other measures but mentioned brain health measures as covariates, or seemed  
32 possibly relevant by including closely related exposures or outcomes (e.g., mental health, frailty,  
33 built environment, nature contact). Full texts included in the final sample reported associations  
34 between green space exposure and brain health outcomes in the main text or supplement.  
35  
36  
37  
38  
39  
40  
41  
42  
43  
44  
45  
46

47 Articles were excluded if they: 1) were not in English; 2) were not primary research studies; 3)  
48 were focused on indoor green space/views; 4) used virtual reality to simulate green spaces; 5)  
49 were ecological studies (e.g., average school test scores); 6) were focused on attention  
50 restoration or mental fatigue (transient states); or 7) centered on green space activities such as  
51 gardening without an adequate control/comparison group to sufficiently capture green space as  
52  
53  
54  
55  
56  
57  
58  
59  
60

1  
2  
3 the main exposure. Reference lists from the final sample and published green space-health  
4 reviews were reviewed to identify other studies meeting the eligibility criteria.<sup>1-8</sup>  
5  
6  
7

### 8 9 **Charting and summarizing the data**

10  
11 Papers were described by study design, location, age groups, green space and brain health  
12 measures and definitions, statistical methods, and main findings (these data were charted into  
13 the Supplemental Tables 1-4). Key study elements were tabulated separately for three major  
14 age groups: children (0-17 years), adults (18-64 years), and older adults ( $\geq 65$  years). Findings  
15 were stratified by age because while studies of children focus on the critical period of childhood  
16 development, studies of 18-64 year olds focus on working adults and studies of  $\geq 65$  year olds  
17 focus on retirement-age individuals. Green space exposures and brain health can differ  
18 substantially during these life stages. Results (positive, inverse, null associations) were  
19 summarized according to age groups, green space measures, brain health measures, and  
20 examined green space-brain health associations to characterize the scope of the evidence to  
21 date.  
22  
23  
24  
25  
26  
27  
28  
29  
30  
31  
32  
33  
34  
35  
36

## 37 **Results**

### 38 *Overall study characteristics*

39  
40 The final sample included 22 papers (Figure 1).<sup>9 53-73</sup> Posthoc additions to the final sample,  
41 published on or before February 13, 2020, included one paper previously known by the author<sup>53</sup>  
42 and one paper identified from the final sample reference lists.<sup>73</sup> Tables 1-4 and Supplemental  
43 Tables 1-4 summarize study characteristics and findings. Eight-two percent ( $n=18^9 54-58 60-64 66-69$   
44 <sup>71-73</sup>) of studies were published on/after 2017 (range: 2012-2020). Seven studies (32%) were in  
45 the United Kingdom, four (18%) in China, three in Spain (14%), two each (9%) in the US and  
46 Canada, and one each (4%) in Bulgaria, Germany, New Zealand, and multiple regions (Spain,  
47 UK, the Netherlands) (Figure 2). Eight studies (36%) focused on <18 year olds (childhood)<sup>54 56 63</sup>  
48  
49  
50  
51  
52  
53  
54  
55  
56  
57  
58  
59  
60

1  
2  
3 65-68 70, seven (32%) focused on 18-64 year olds (adulthood)<sup>53 55 57 60 62 63 72</sup>, and 13 (59%)  
4  
5 focused on ≥65 year olds (older adulthood)<sup>9 53 55 58-64 69 71 73</sup> (Figure 3). Fourteen studies (64%)<sup>9</sup>  
6  
7 53-64 68 were based on population-based cohorts or random sampling strategies. Two studies  
8  
9 (9%) examined life course associations, both investigating childhood and mid-life park space  
10  
11 exposures and cognitive change in late-life.<sup>63 64</sup>  
12  
13  
14

15  
16 Seventeen studies (77%) found associations (14 positive<sup>9 54-56 60-67 72 73</sup>, four inverse<sup>57-60</sup>) and five  
17  
18 (23%) found no associations<sup>53 68-71</sup> between greenness/green space and brain health (Tables 1-  
19  
20 4, Figure 4). Twelve studies (55%) reported a combination of positive, inverse, and/or null  
21  
22 associations.<sup>54 55 57 58 60 62-66 72 73</sup> All but one study<sup>69</sup> employed multivariable linear or logistic  
23  
24 regression accounting for key confounders (i.e., age, sex, socioeconomic status [SES]) and  
25  
26 twelve (55%)<sup>9 53-56 58 59 61 62 64 65 70</sup> used regression methods accounting for data clustering/multi-  
27  
28 level data.  
29  
30  
31

### 32 *Findings by age group*

33  
34 *Children.* Five<sup>54 56 65-67</sup> of the eight studies<sup>54 56 63 65-68 70</sup> found green space-brain health  
35  
36 associations in children (five positive, zero inverse) (Table 1). Greater neighborhood  
37  
38 greenness/green space was associated with working memory<sup>54 56</sup>, attention<sup>54 65</sup>, and intellectual  
39  
40 development<sup>67</sup> and with specific brain regions.<sup>66</sup> Null associations were found between greater  
41  
42 greenness/green space and intelligence<sup>63</sup>, alerting<sup>65</sup>, orienting<sup>65</sup>, executive processing/function<sup>65</sup>  
43  
44 <sup>68</sup>, fluid ability<sup>68</sup>, crystallized ability<sup>68</sup>, working memory<sup>68</sup>, and attention.<sup>54 65 68</sup> Time spent in  
45  
46 green space measured via global positioning system (GPS) tracking was not associated with  
47  
48 multiple cognitive domains (e.g., visual and verbal memory, processing speed).<sup>70</sup>  
49  
50  
51  
52

53  
54 *Adults (18-64 years).* Five of the seven studies<sup>53 55 57 60 63 72</sup> found green space-brain health  
55  
56 associations in adults (four positive<sup>55 60 62 72</sup>, two inverse<sup>57 60</sup>) (Table 1). Increased residential  
57  
58  
59  
60

1  
2  
3 distance to natural outdoor environments was associated with longer cognitive test completion  
4 times<sup>62</sup>, and greater neighborhood greenness was positively and inversely associated with  
5 dementia diagnoses (detailed in “Older adults” section below).<sup>60</sup> Greater neighborhood  
6 greenness was cross-sectionally associated with better global cognition<sup>72</sup> and was associated  
7 with slower longitudinal decline on global cognition, reasoning, and verbal fluency.<sup>55</sup>  
8  
9 Additionally, greater neighborhood green space was associated with greater cortical thickness  
10 in the prefrontal cortex, bilateral fusiform gyrus, left precuneus and insula, and right cuneus as  
11 measured via MRI.<sup>72</sup> Null associations were found between greater neighborhood  
12 greenness/green space or five-year change in greenness and measures of global cognition<sup>53 72</sup>,  
13 intelligence<sup>63</sup>, reaction time<sup>57</sup>, reasoning<sup>57</sup>, memory<sup>55 57 72</sup>, naming<sup>72</sup>, and visual  
14 attention/executive processing.<sup>62</sup> No associations were found between self-reported visits or  
15 time spent in natural environments and visual attention/executive processing<sup>62</sup>, and no  
16 associations were observed between greater greenness and cortical thickness of other brain  
17 MRI regions (e.g., right cuneus and insula).<sup>72</sup> Lastly, inverse associations were found between  
18 five-year change in neighborhood greenness and reasoning.<sup>57</sup>  
19  
20  
21  
22  
23  
24  
25  
26  
27  
28  
29  
30  
31  
32  
33  
34  
35  
36

37 *Older adults (≥65 years)*. Ten of 13 studies<sup>9 53 55 58-64 69 71 73</sup> found green space-brain health  
38 associations in older adults (eight positive<sup>9 55 60-64 73</sup>, three inverse<sup>58-60</sup>) (Table 1). Greater  
39 neighborhood greenness was associated with lower risk of Alzheimer’s disease<sup>9</sup>, non-  
40 Alzheimer’s disease<sup>60</sup> and Parkinson’s disease diagnoses<sup>60</sup> in some studies, but increased risk  
41 of cognitive impairment<sup>58 59</sup> and Alzheimer’s disease diagnoses<sup>60</sup> in others. Greater  
42 neighborhood greenness/green space was positively associated with intelligence<sup>63 64</sup>, global  
43 cognition<sup>55</sup>, reasoning<sup>55</sup>, verbal fluency<sup>55</sup>, and visual attention/executive processing.<sup>55 62-64</sup> In  
44 addition, greater green space (i.e., forests) was associated with better amygdala integrity  
45 measured via MRI.<sup>73</sup> Null associations were found between neighborhood greenness/green  
46 space and intelligence<sup>63 64</sup>, global cognition<sup>53 69 71</sup>, short-term memory<sup>55</sup> and visual  
47  
48  
49  
50  
51  
52  
53  
54  
55  
56  
57  
58  
59  
60

1  
2  
3 attention/executive processing.<sup>62</sup> Time spent in natural environments was not associated with  
4 visual attention/executive processing.<sup>62</sup> Lastly, urban green space was not associated with brain  
5 integrity measured via MRI.<sup>73</sup>  
6  
7

#### 8 *Findings by green space measure*

9  
10 Green space definitions included: 1) greenness measured using the normalized difference  
11 vegetation index (NDVI) or enhanced vegetation index (EVI)<sup>9 54 55 57 60-62 65-69 71 72</sup>; 2) tree  
12 canopy/cover measured using vegetation continuous fields (VCF)<sup>54</sup>; 3) neighborhood  
13 percentage green/park space or park area<sup>53 56 58 59 63 64 73</sup>; 4) time spent in green space (objective  
14 or self-reported)<sup>62 70</sup>; 5) self-reported amount of natural environment near residence<sup>62</sup>; and 6)  
15 distance from residence to natural outdoor environment<sup>62</sup> (Table 2). Three studies examined  
16 more than one green space measure: 1) NDVI and VCF<sup>54</sup>; 2) NDVI and EVI<sup>55</sup>; and 3) NDVI,  
17 distance to natural outdoor environment, and self-reported green space measures.<sup>62</sup> Most  
18 studies measured green space in the residential neighborhood, although a few additionally  
19 measured green space surrounding schools and school routes.<sup>64 65</sup> No studies examined work  
20 area green spaces. NDVI was the most commonly used measure. The boundaries used to  
21 define green space exposures varied greatly (e.g., 100 to 1,500m radial buffers around  
22 residences, 1000m buffers around postcode centroids, US Census tracts, 50m buffers around  
23 school route).  
24  
25  
26  
27  
28  
29  
30  
31  
32  
33  
34  
35  
36  
37  
38  
39  
40  
41  
42

43 **NDVI.** Ten of 14 studies<sup>9 54 55 57 60-62 65-69 71 72</sup> using NDVI found associations (nine positive<sup>9 54 55 60</sup>  
44 <sup>61 65-67 72</sup>, two inverse<sup>57 60</sup>) (Table 2). Of the studies with positive findings, one examined MRI  
45 brain measures<sup>66</sup> and three examined risk/odds of cognitive impairment/dementia.<sup>9 60 61</sup> The  
46 remaining studies with positive findings focused on various cognitive domains. In studies with  
47 inverse associations, five-year NDVI increase was associated with worse reasoning in 40-69  
48 year olds<sup>57</sup> and greater greenness was associated with lower risk of non-Alzheimer's disease  
49 dementia and Parkinson's disease among 45-84 year olds.<sup>60</sup>  
50  
51  
52  
53  
54  
55  
56  
57  
58  
59  
60

1  
2  
3  
4  
5 *Park space.* Two<sup>63 64</sup> of three studies on percent/amount of residential park space found positive  
6 associations with cognitive change in late-life (Table 2). These positive associations were  
7 restricted to childhood and mid-life park space exposures and cognitive changes from ages 70  
8 to 76. No associations were observed between early- and mid-life exposures and cognitive  
9 changes from ages 11 to 76 or between late-life park space exposure and cognitive changes at  
10 any age (11-76 years). The third study found no associations between neighborhood park area  
11 and cognition.<sup>53</sup>

12  
13  
14  
15  
16  
17  
18  
19  
20  
21  
22 *Other measures.* Measures of time spent in green space based on objective GPS tracking<sup>70</sup> or  
23 self-report<sup>62</sup> were not associated with cognition. Positive associations were observed between  
24 percentage residential green space derived from land use data and spatial working memory<sup>56</sup>,  
25 and between distance to the nearest natural outdoor environment and visual attention/executive  
26 processing.<sup>62</sup> Greater amounts of forest surrounding the residence were associated with greater  
27 amygdala integrity, whereas amount of neighborhood urban green space was not associated  
28 with MRI measures of brain integrity.<sup>73</sup> Percentage green space and private gardens based on  
29 land use data was inversely associated with odds of cognitive impairment/dementia.<sup>58 59</sup> Tree  
30 canopy/cover (VCF) was not associated with attention in children.<sup>54</sup> Lastly, self-reported  
31 amount of residential natural environment was not associated with visual attention/executive  
32 processing.<sup>62</sup>

### 33 34 35 36 37 38 39 40 41 42 43 44 45 46 47 *Findings by brain health measure*

48  
49 Fifteen studies (68%) examined cognitive function.<sup>53-57 62-65 67-72</sup> A range of cognitive domains  
50 were assessed, including but not limited to global cognition, working memory, attention,  
51 reasoning, verbal fluency, and executive function. Five studies (23%)<sup>58 59 61 69 71</sup> used the Mini  
52 Mental State Exam (MMSE), a global cognition screening test, while the remaining used a  
53  
54  
55  
56  
57  
58  
59  
60



1  
2  
3 variety of other instruments. Five studies (23%)<sup>9 58-61</sup> examined diagnosis of cognitive  
4  
5 impairment or dementia (including Alzheimer's and Parkinson disease) and three focused on  
6  
7 brain MRI.<sup>66 72 73</sup> Eight studies (36%)<sup>54 55 60 61 63-65 68</sup> used longitudinal data on brain health, but  
8  
9 only five (23%)<sup>55 60 63-65</sup> actually examined longitudinal changes in brain health (i.e., cognitive  
10  
11 decline or dementia risk).  
12  
13

14  
15  
16 Ten studies (45%) found associations between green space and cognition (9 positive<sup>54-56 62-65 67</sup>  
17  
18 <sup>72</sup>, 1 inverse<sup>57</sup>) (Table 3). Greater greenness/green space was associated with global cognition,  
19  
20 working memory, spatial working memory attention, visual attention, reasoning, fluency, and  
21  
22 measures of intelligence and childhood intellectual development, as delineated in the sections  
23  
24 further above. The three studies using brain MRI found positive associations between  
25  
26 greenness/green space and certain brain regions<sup>66</sup>, cortical thickness<sup>72</sup>, and amygdala  
27  
28 integrity.<sup>73</sup> Two studies found positive associations between greenness/green space and  
29  
30 Alzheimer's disease<sup>9</sup>, non-Alzheimer's dementia<sup>60</sup>, and Parkinson's disease<sup>60</sup> diagnoses,  
31  
32 whereas three found inverse associations with Alzheimer's disease<sup>60</sup> or cognitive  
33  
34 impairment/dementia diagnoses.<sup>58 59</sup>  
35  
36  
37  
38

### 39 *Effect modification*

40  
41 Effect modification is variation in the association between an exposure and outcome depending  
42  
43 on the value of another factor. Seven<sup>55 57 58 61 63 64 67</sup> of 11 studies<sup>9 54-58 61 63-65 67</sup> found effect  
44  
45 modification (Supplemental Table 4). Green space-brain health associations were stronger  
46  
47 in/limited to women<sup>55 57 63</sup>; APOE  $\epsilon$ 4 non-carriers<sup>61 63</sup>; and those with lower occupational class<sup>63</sup>,  
48  
49 higher education levels<sup>55</sup>, lower BMI<sup>67</sup>, and younger age<sup>61</sup> (in study of older adults). Associations  
50  
51 also were stronger among residents of conurbations<sup>58</sup> (urbanized area composed of multiple  
52  
53 cities/towns), areas with lower traffic accident densities<sup>64</sup>, and areas of higher deprivation<sup>55</sup>.  
54  
55  
56 Other studies found no effect modification by neighborhood SES<sup>9 56 65</sup>, sex<sup>64</sup>, maternal  
57  
58  
59  
60

1  
2  
3 education<sup>65</sup>, residential stability/years in residence<sup>56</sup>, race<sup>57</sup>, marital status<sup>57</sup>, city<sup>57</sup>, or household  
4  
5 income.<sup>57</sup>  
6  
7

### 8 9 *Mediation*

10  
11 Three<sup>65 71 72</sup> of seven studies<sup>53 55 62 65 67 71 72</sup> suggested mediation, which is the presence of an  
12  
13 intermediary variable associated with both the exposure and outcome that potentially explains  
14  
15 the causal mechanism linking the two variables (Supplemental Table 4). Traffic-related air  
16  
17 pollution (elemental carbon in residence) mediated associations between school greenness and  
18  
19 working memory and attentiveness in children<sup>65</sup> and self-reported physical activity mediated  
20  
21 associations between greater residential greenness and global cognition in older adults.<sup>71</sup>  
22  
23 Associations between greater neighborhood greenness and better global cognition among  
24  
25 middle-aged adults were mediated by lower waist circumference but not by systolic blood  
26  
27 pressure, total cholesterol, glucose, air pollution (NO<sub>2</sub>), or traffic-related noise.<sup>72</sup> The other four  
28  
29 studies found no mediation of green space-brain health associations by physical activity<sup>53 55 62</sup>,  
30  
31 social measures (e.g., interaction, loneliness)<sup>53</sup>, perceived mental health<sup>62</sup>, traffic noise  
32  
33 annoyance<sup>62</sup>, worry about air pollution<sup>62</sup>, or air pollution levels (i.e., PM<sub>2.5</sub>).<sup>55</sup>  
34  
35  
36  
37  
38

### 39 **Discussion**

40  
41 Evidence was found for associations between green space exposure measured at various life  
42  
43 stages and brain health. Seventy-one percent of NDVI studies (greenness) found positive  
44  
45 associations. Greater neighborhood greenness/green space was positively associated with  
46  
47 multiple cognitive domains, brain regions, and lower odds/risk of AD and non-Alzheimer's  
48  
49 disease dementia. However, some studies found inverse or null associations, few studies were  
50  
51 conducted within each major age group, and the studies employed limited and heterogeneous  
52  
53 methods and definitions. The remainder of this section focuses on the second aim of the  
54  
55 scoping review, which is to identify scientific gaps for future research.  
56  
57  
58  
59  
60

### *Brain health measures*

The diversity of employed brain health measures limits study comparisons. Measures of attention were associated with green space in more than one study<sup>54 62 65</sup>, but additional research is needed to confirm these associations. Studies more frequently assessed executive function, attention, and working memory, and fewer examined short- or long-term memory, language/fluency, processing speed, or visuospatial function. The focus on the former cognitive domains may be due to data availability, but also potential hypothesized underlying mechanisms relating green space and brain health, in which green space exposure restores attention and reduces mental fatigue/stress.<sup>26-28</sup> Nonetheless, green space exposures may be associated with other cognitive measures reflecting brain regions susceptible to green space-related behaviors/exposures. New studies are needed to assess green space associations with cognitive domains commonly affected in typical and atypical AD presentations, including episodic memory<sup>15</sup>, visuospatial processing<sup>74</sup>, and language<sup>75</sup>. These cognitive domains have been associated with physical activity, social engagement, and air pollution exposure<sup>76-78</sup> and are important to investigate in future studies given the plausible mechanisms relating green spaces and these health behaviors/exposures (as detailed in introduction).

Greater greenness/green space displayed mixed associations (positive/inverse) with diagnoses of cognitive impairment or dementia. The mixed findings may be explained by the employed study methods, as three of the four studies were cross-sectional and none examined or controlled for early- and mid-life factors beyond educational attainment. With the onset of health problems or cognitive symptoms, individuals may be more likely to move to greener rural and suburban areas where there are assisted living and nursing care residences. Thus, the associations between greater late-life neighborhood greenness/green space and increased odds/risk of cognitive impairment may be explained by reverse causality/self-selection into greener neighborhoods in later life. Reverse causality will need to be ruled out in future studies

1  
2  
3 by using more sophisticated study designs and methods (e.g., life course, instrumental  
4 variables).  
5  
6  
7

8  
9 Clinical diagnoses may be biased by cultural or education factors that may increase or decrease  
10 the chance of receiving a diagnosis irrespective of disease presence. For instance, minorities  
11 may be more likely to receive dementia diagnoses if educational and cultural differences are  
12 unaccounted for in cognitive testing or if a higher prevalence of comorbidities increases AD/DRD  
13 risk.<sup>79</sup> Nevertheless, diagnoses are clinically significant measures of brain health, particularly  
14 when made by specialists with expertise in discerning the presence and etiology of dementia,  
15 and thus are useful measures for future green space-brain health research in older adults.  
16  
17  
18  
19  
20  
21  
22  
23  
24  
25

26 To date, three studies investigated associations between green space and MRI biomarkers,  
27 specifically regional brain volumes<sup>66</sup>, measures of structural integrity<sup>73</sup>, and measures of cortical  
28 thickness<sup>72</sup> obtained from structural MRI. The study of associated brain regions<sup>66</sup> used an  
29 intensive method of analysis (examining associations for each 3-D pixel [voxel] of brain image)  
30 that significantly limited the number of confounders included in the multivariable analyses. An  
31 alternative to the voxel-wise analysis, which would allow controlling for multiple important  
32 confounders, would be to measure brain health/atrophy using regional brain volumes (mm<sup>3</sup>) and  
33 cortical thickness determined through standardized segmentation techniques.<sup>80</sup> The findings for  
34 associations between greater greenness/green space and greater amygdala integrity and  
35 cortical thickness will need to be replicated. Lastly, measures of global brain atrophy from MRI,  
36 such as total grey matter volume or ventricular volume, may be a useful addition for future  
37 studies under the presumption that green space exposures affect overall brain development and  
38 aging.  
39  
40  
41  
42  
43  
44  
45  
46  
47  
48  
49  
50  
51  
52  
53  
54  
55  
56  
57  
58  
59  
60

### *Green space measures*

This review suggest that NDVI is a valuable measure for future studies of green space and brain health. However, NDVI does not assess tree canopy/cover or other qualities of green spaces (e.g., park amenities).<sup>20</sup> Future work will need to consistently incorporate quality measures including tree canopy/cover, availability of park amenities (e.g., walking trails), and safe walking routes/sidewalks, which will help identify types of green space environments<sup>20</sup> most effective at promoting brain health.

Studies measuring percentage of the neighborhood composed of green space (i.e., parks) found positive<sup>56,63-64,73</sup>, inverse<sup>58-59</sup>, and null associations<sup>53,58,63-64,73</sup>, warranting additional studies. Compared to NDVI (greenness), percentage green space may better capture access to green spaces. For instance, associations with NDVI measures can be affected by the chosen cut points to define healthy vegetation (e.g.,  $NDVI > 0.40$  or  $NDVI > 0.60$ ), the satellite image used to derive NDVI (affected by season and cloud cover), or green space fragmentation (pockets) that can skew mean NDVI values.<sup>20</sup> Green space access may be a stronger predictor of healthy behaviors such as physical activity, particularly among socioeconomically disadvantaged individuals with limited resources and opportunities for exercise.<sup>81</sup> Other measures of green space access to should be investigated (e.g., number of neighborhood parks) to determine the strongest predictors of both healthy behaviors and better brain health.

The single study incorporating self-reported measures of green space exposure found no associations.<sup>62</sup> Objective green space measures are necessary to suggest target amounts and qualities of green space for interventions, plans, and policies. However, self-reported and perceived measures may be useful in tandem with objective measures. Valid and reliable green space questionnaires would minimize burden and data security concerns in attempting to derive objective measures from residential addresses across the life span.

1  
2  
3 The majority of studies did not measure actual exposure to green spaces (i.e., time spent in  
4 green spaces).<sup>62,70</sup> Travel diaries could be used to assess time spent in green spaces, although  
5 compliance in diary completion and misreporting may be an issue.<sup>82</sup> Although studies have  
6 successfully incorporated GPS to investigate neighborhood environmental exposures and  
7 outcomes including physical activity<sup>83-85</sup>, costs, difficulty in recruiting, participant time required,  
8 and non-compliance can be a hurdle.<sup>86</sup> Despite these limitations, GPS and travel diary  
9 measures of time spent in green space provide increased specificity of exposure needed to  
10 make informed decisions about green space-brain health associations. If individuals live in  
11 neighborhoods with greater access to green space but they do not regularly spend time in those  
12 spaces, then associations with brain health observed in prior research have been spurious or  
13 biased by residual confounding.  
14  
15  
16  
17  
18  
19  
20  
21  
22  
23  
24  
25  
26  
27

28 Places for estimating green space exposures may depend on the age group under study, but  
29 only two studies measured non-residential exposures.<sup>64,65</sup> Green space exposure may occur  
30 most frequently in residential and school environments among children; residential, working,  
31 and recreational environments among working adults; and residential and recreational  
32 environments among older adults.<sup>64,84</sup> Future studies will benefit from a more comprehensive  
33 assesment of places for green space exposures, and longitudinal studies following individuals  
34 progressing through these life stages should keep age-based differences in activity spaces in  
35 mind.  
36  
37  
38  
39  
40  
41  
42  
43  
44  
45  
46

#### 47 *Life course exposures*

48 Many of the studies of middle- and older-aged adults were cross-sectional<sup>9 53 57-59 61 62 69 71-73</sup> and  
49 lacked consideration of earlier life green space exposures.<sup>9 53 55 57-62 69 71-73</sup> Childhood exposures  
50 may be most critical for determining late-life brain health by influencing healthy brain  
51 development. These neurodevelopmental benefits may impart cognitive reserve and resilience  
52  
53  
54  
55  
56  
57  
58  
59  
60

1  
2  
3 through older ages, which protects against ADRD neuropathology and resists symptoms despite  
4 neuropathology.<sup>87</sup> Green space exposure patterns during childhood may also establish healthy  
5 habits including physical activity that continue through adulthood to boost and maintain brain  
6 health. The importance of including childhood measures in future studies also applies to  
7 confounders such as early-life personal and neighborhood SES, which have been found to be  
8 associated with late-life cognitive health.<sup>88</sup>  
9  
10  
11  
12  
13  
14

15  
16  
17  
18 Some evidence suggests that mid-life behaviors may be stronger predictors of late-life cognitive  
19 decline and dementia risk than late-life behaviors.<sup>89-90</sup> In a similar fashion, green space  
20 exposures in mid-life versus late-life may be more strongly associated with late-life brain health.  
21 Mid-life exposures are of particular interest because the neuropathology associated with ADRD  
22 often starts decades prior to symptom development (i.e., in mid-life).<sup>91</sup> During mid-life, green  
23 space-related behaviors/exposures such as physical activity may help resist the development of  
24 ADRD neuropathology or decrease the neuropathological burden.<sup>92</sup> Yet, even late-life green  
25 space exposures may help maintain brain health in older age by providing accessible places  
26 that encourage exercise, relaxation, and socializing. Life course studies are needed to  
27 determine the critical periods of green space exposure related to late-life brain health and  
28 ADRD risk.  
29  
30  
31  
32  
33  
34  
35  
36  
37  
38  
39  
40  
41  
42

### 43 *Causal mechanisms*

44  
45 Traffic-related air pollution and self-reported physical activity were found to be mediators,  
46 providing preliminary evidence for these two causal mechanisms. Future evaluation of  
47 mediation by physical activity should use rigorous, objective measures such as those obtained  
48 from accelerometers. Social engagement and related measures were not found to be mediators,  
49 and mental health (e.g., anxiety, depression) and immune function were not examined in any  
50 study. Altogether, few studies examined mediation, additional work is need to determine causal  
51  
52  
53  
54  
55  
56  
57  
58  
59  
60

1  
2  
3 pathways for green space-brain health associations, and future studies will need to employ  
4 rigorous methods to evaluate mediation.<sup>93</sup>  
5  
6  
7

### 8 9 *Future research directions*

10  
11 New studies will need to incorporate longitudinal measures of green space (accumulation of  
12 exposures and changes over time) and brain health. GPS-based measures of green activity  
13 spaces and time spent in green spaces will improve the quantification and quality assessment of  
14 green space exposures. Use of brain biomarkers such as structural and functional MRI, PET  
15 scans, and CSF biomarkers to detect brain neurodegeneration/ADRD may provide biological  
16 evidence for associations. Green space exposures should temporally precede the brain health  
17 measures, and the validity and reliability of green space measures need to be established.  
18  
19

20 Causal mechanisms need to be delineated through rigorous investigation of potential mediators.  
21 In addition, the evidence base will be strengthened by capitalizing on natural experiments (e.g.,  
22 planned green space additions) to study green space associations with brain health.  
23  
24  
25

26  
27 Future studies will need to incorporate relevant factors insufficiently examined to date, including  
28 the potential impact of residential moves, seasonality of exposure/regional climate, bias due to  
29 self-selection into greener neighborhoods (i.e., reverse causality), and neighborhood-level  
30 confounders (e.g., crime, population density). Research is needed on the pertinent places (e.g.,  
31 neighborhood, work, recreational) and boundaries (e.g., 1,000m buffer) for green space  
32 exposures. Studies need to determine if associations are present irrespective of or instead  
33 depend on race/ethnicity and culture, by demonstrating associations in multiple international  
34 contexts and in various regions of diverse countries such as the US.  
35  
36  
37  
38  
39  
40  
41  
42  
43  
44  
45  
46  
47  
48  
49  
50  
51  
52  
53  
54  
55  
56  
57  
58  
59  
60



### *Limitations*

Limitations of the reviewed studies include lack of consideration of early-life green space exposures and examination of actual time spent in green spaces. Thus, the studies were likely affected by misclassification/information bias. Selection bias was also likely for many of the studies that restricted to samples with non-missing data on exposures and outcomes.

This review may be limited by positive publication bias. In addition, papers may have been missed due to the nature of this rapid review, which was based on three databases, a restricted review of the Web of Science search results (detailed in methods and Supplemental Figure 1), and a single reviewer. However, the review of reference lists and related reviews helped reduce the possibility. As this was a rapid review with scoping aims<sup>47 49 51 52</sup>, it was never intended to systematically evaluate the evidence for risk of bias, which will be reserved for future systematic reviews.

### *Conclusion*

This rapid review identified twenty-two studies of green space and brain health. The majority of studies were cross-sectional and the green space and brain health measures were heterogeneous. Despite the limitations, multiple studies investigating neighborhood greenness found positive associations with brain health outcomes at various life stages. Thus, the evidence is suggestive that green space is associated with brain health and future systematic reviews are warranted. The observed positive associations need to be replicated in longitudinal and life course studies of diverse cohorts and in studies using more rigorous measurements and statistical methods. These improvements are needed to build a case for community-level green space interventions to impart brain resilience, maintain/improve cognition, and reduce ADRD risk in late life.

1  
2  
3 **Ethics approval statement**  
4

5 Not applicable  
6  
7  
8  
9  
10  
11  
12  
13  
14  
15  
16  
17  
18  
19  
20  
21  
22  
23  
24  
25  
26  
27  
28  
29  
30  
31  
32  
33  
34  
35  
36  
37  
38  
39  
40  
41  
42  
43  
44  
45  
46  
47  
48  
49  
50  
51  
52  
53  
54  
55  
56  
57  
58  
59  
60

For peer review only

## References

1. Frumkin H, Bratman GN, Breslow SJ, et al. Nature Contact and Human Health: A Research Agenda. *Environ Health Perspect* 2017;125(7):075001. doi: 10.1289/EHP1663 [published Online First: 2017/08/11]
2. Hartig T, Mitchell R, de Vries S, et al. Nature and health. *Annu Rev Public Health* 2014;35:207-28. doi: 10.1146/annurev-publhealth-032013-182443 [published Online First: 2014/01/07]
3. Twohig-Bennett C, Jones A. The health benefits of the great outdoors: A systematic review and meta-analysis of greenspace exposure and health outcomes. *Environ Res* 2018;166:628-37. doi: 10.1016/j.envres.2018.06.030 [published Online First: 2018/07/10]
4. Gascon M, Triguero-Mas M, Martinez D, et al. Residential green spaces and mortality: A systematic review. *Environ Int* 2016;86:60-7. doi: 10.1016/j.envint.2015.10.013 [published Online First: 2015/11/06]
5. de Keijzer C, Gascon M, Nieuwenhuijsen MJ, et al. Long-Term Green Space Exposure and Cognition Across the Life Course: a Systematic Review. *Curr Environ Health Rep* 2016;3(4):468-77. doi: 10.1007/s40572-016-0116-x [published Online First: 2016/10/13]
6. Fong KC, Hart JE, James P. A Review of Epidemiologic Studies on Greenness and Health: Updated Literature Through 2017. *Curr Environ Health Rep* 2018;5(1):77-87. doi: 10.1007/s40572-018-0179-y [published Online First: 2018/02/03]
7. Vanaken GJ, Danckaerts M. Impact of Green Space Exposure on Children's and Adolescents' Mental Health: A Systematic Review. *Int J Environ Res Public Health* 2018;15(12) doi: 10.3390/ijerph15122668 [published Online First: 2018/11/30]
8. Hankey S, Marshall JD. Urban Form, Air Pollution, and Health. *Curr Environ Health Rep* 2017;4(4):491-503. doi: 10.1007/s40572-017-0167-7 [published Online First: 2017/10/21]

- 1  
2  
3 9. Brown SC, Perrino T, Lombard J, et al. Health Disparities in the Relationship of  
4  
5 Neighborhood Greenness to Mental Health Outcomes in 249,405 U.S. Medicare  
6  
7 Beneficiaries. *Int J Environ Res Public Health* 2018;15(3) doi: 10.3390/ijerph15030430  
8  
9 [published Online First: 2018/03/02]  
10
- 11 10. Roberts R, Knopman DS. Classification and epidemiology of MCI. *Clin Geriatr Med*  
12  
13 2013;29(4):753-72. doi: 10.1016/j.cger.2013.07.003 [published Online First: 2013/10/08]  
14  
15
- 16 11. World Health Organization. Dementia [Available from: [https://www.who.int/news-room/fact-](https://www.who.int/news-room/fact-sheets/detail/dementia)  
17  
18 sheets/detail/dementia accessed 2/10/2020].  
19
- 20 12. Baumgart M, Snyder HM, Carrillo MC, et al. Summary of the evidence on modifiable risk  
21  
22 factors for cognitive decline and dementia: A population-based perspective. *Alzheimers*  
23  
24 *Dement* 2015;11(6):718-26. doi: 10.1016/j.jalz.2015.05.016 [published Online First:  
25  
26 2015/06/06]  
27
- 28 13. Jack CR, Jr., Bennett DA, Blennow K, et al. NIA-AA Research Framework: Toward a  
29  
30 biological definition of Alzheimer's disease. *Alzheimers Dement* 2018;14(4):535-62. doi:  
31  
32 10.1016/j.jalz.2018.02.018 [published Online First: 2018/04/15]  
33  
34
- 35 14. Montine TJ, Monsell SE, Beach TG, et al. Multisite assessment of NIA-AA guidelines for the  
36  
37 neuropathologic evaluation of Alzheimer's disease. *Alzheimers Dement* 2016;12(2):164-  
38  
39 69. doi: 10.1016/j.jalz.2015.07.492 [published Online First: 2015/08/29]  
40
- 41 15. Hugo J, Ganguli M. Dementia and cognitive impairment: epidemiology, diagnosis, and  
42  
43 treatment. *Clin Geriatr Med* 2014;30(3):421-42. doi: 10.1016/j.cger.2014.04.001  
44  
45 [published Online First: 2014/07/20]  
46
- 47 16. Apostolova LG, Green AE, Babakchanian S, et al. Hippocampal atrophy and ventricular  
48  
49 enlargement in normal aging, mild cognitive impairment (MCI), and Alzheimer Disease.  
50  
51 *Alzheimer Dis Assoc Disord* 2012;26(1):17-27. doi: 10.1097/WAD.0b013e3182163b62  
52  
53 [published Online First: 2012/02/22]  
54  
55  
56  
57  
58  
59  
60

- 1  
2  
3 17. Liu S, Liu J, Wang XD, et al. Caregiver burden, sleep quality, depression, and anxiety in  
4 dementia caregivers: a comparison of frontotemporal lobar degeneration, dementia with  
5 Lewy bodies, and Alzheimer's disease. *Int Psychogeriatr* 2017;1-8. doi:  
6  
7 10.1017/S1041610217002630 [published Online First: 2017/12/11]  
8  
9  
10  
11 18. Galvin JE, Howard DH, Denny SS, et al. The social and economic burden of frontotemporal  
12 degeneration. *Neurology* 2017;89(20):2049-56. doi: 10.1212/WNL.0000000000004614  
13  
14 [published Online First: 2017/10/06]  
15  
16  
17  
18 19. Alzheimer's Association. 2020 Alzheimer's Disease Facts and Figures 2020 [Available from:  
19  
20 <https://www.alz.org/media/Documents/alzheimers-facts-and-figures.pdf> accessed  
21  
22 05/08/2020.  
23  
24  
25 20. Markevych I, Schoierer J, Hartig T, et al. Exploring pathways linking greenspace to health:  
26  
27 Theoretical and methodological guidance. *Environ Res* 2017;158:301-17. doi:  
28  
29 10.1016/j.envres.2017.06.028 [published Online First: 2017/07/04]  
30  
31 21. Erickson KI, Voss MW, Prakash RS, et al. Exercise training increases size of hippocampus  
32  
33 and improves memory. *Proc Natl Acad Sci U S A* 2011;108(7):3017-22. doi:  
34  
35 10.1073/pnas.1015950108 [published Online First: 2011/02/02]  
36  
37 22. Fleischman DA, Yang J, Arfanakis K, et al. Physical activity, motor function, and white  
38  
39 matter hyperintensity burden in healthy older adults. *Neurology* 2015;84(13):1294-300.  
40  
41 doi: 10.1212/WNL.0000000000001417 [published Online First: 2015/03/13]  
42  
43  
44 23. Vivar C, Potter MC, van Praag H. All about running: synaptic plasticity, growth factors and  
45  
46 adult hippocampal neurogenesis. *Curr Top Behav Neurosci* 2013;15:189-210. doi:  
47  
48 10.1007/7854\_2012\_220 [published Online First: 2012/08/01]  
49  
50 24. van Tol MJ, van der Wee NJ, van den Heuvel OA, et al. Regional brain volume in  
51  
52 depression and anxiety disorders. *Arch Gen Psychiatry* 2010;67(10):1002-11. doi:  
53  
54 10.1001/archgenpsychiatry.2010.121 [published Online First: 2010/10/06]  
55  
56  
57  
58  
59  
60

- 1  
2  
3 25. Wilker EH, Preis SR, Beiser AS, et al. Long-term exposure to fine particulate matter,  
4 residential proximity to major roads and measures of brain structure. *Stroke*  
5 2015;46(5):1161-6. doi: 10.1161/STROKEAHA.114.008348 [published Online First:  
6 2015/04/25]  
7  
8  
9  
10  
11 26. Berto R. The role of nature in coping with psycho-physiological stress: a literature review on  
12 restorativeness. *Behav Sci (Basel)* 2014;4(4):394-409. doi: 10.3390/bs4040394  
13 [published Online First: 2014/11/29]  
14  
15  
16  
17 27. Stevenson MP, Schilhab T, Bentsen P. Attention Restoration Theory II: a systematic review  
18 to clarify attention processes affected by exposure to natural environments. *J Toxicol*  
19 *Environ Health B Crit Rev* 2018;21(4):227-68. doi: 10.1080/10937404.2018.1505571  
20 [published Online First: 2018/08/22]  
21  
22  
23  
24  
25 28. Pasanen T, Johnson K, Lee K, et al. Can Nature Walks With Psychological Tasks Improve  
26 Mood, Self-Reported Restoration, and Sustained Attention? Results From Two  
27 Experimental Field Studies. *Front Psychol* 2018;9:2057. doi: 10.3389/fpsyg.2018.02057  
28 [published Online First: 2018/11/15]  
29  
30  
31  
32  
33 29. Stigsdotter UK, Ekholm O, Schipperijn J, et al. Health promoting outdoor environments--  
34 associations between green space, and health, health-related quality of life and stress  
35 based on a Danish national representative survey. *Scand J Public Health*  
36 2010;38(4):411-7. doi: 10.1177/1403494810367468 [published Online First: 2010/04/24]  
37  
38  
39  
40  
41  
42 30. Van Den Berg AE, Custers MH. Gardening promotes neuroendocrine and affective  
43 restoration from stress. *J Health Psychol* 2011;16(1):3-11. doi:  
44 10.1177/1359105310365577 [published Online First: 2010/06/05]  
45  
46  
47  
48  
49 31. Kessing LV. Depression and the risk for dementia. *Curr Opin Psychiatry* 2012;25(6):457-61.  
50 doi: 10.1097/YCO.0b013e328356c368 [published Online First: 2012/07/18]  
51  
52  
53  
54  
55  
56  
57  
58  
59  
60

- 1  
2  
3 32. Ruokolainen L, von Hertzen L, Fyhrquist N, et al. Green areas around homes reduce atopic  
4 sensitization in children. *Allergy* 2015;70(2):195-202. doi: 10.1111/all.12545 [published  
5 Online First: 2014/11/13]  
6  
7  
8  
9 33. Sun M, Ma K, Wen J, et al. A Review of the Brain-Gut-Microbiome Axis and the Potential  
10 Role of Microbiota in Alzheimer's Disease. *J Alzheimers Dis* 2020;73(3):849-65. doi:  
11 10.3233/JAD-190872 [published Online First: 2019/12/31]  
12  
13  
14 34. Nielsen CC, Gascon M, Osornio-Vargas AR, et al. Natural environments in the urban  
15 context and gut microbiota in infants. *Environ Int* 2020;142:105881. doi:  
16 10.1016/j.envint.2020.105881 [published Online First: 2020/07/02]  
17  
18  
19 35. Logan AC. Dysbiotic drift: mental health, environmental grey space, and microbiota. *J*  
20 *Physiol Anthropol* 2015;34:23. doi: 10.1186/s40101-015-0061-7 [published Online First:  
21 2015/05/08]  
22  
23  
24 36. Dalton AM, Wareham N, Griffin S, et al. Neighbourhood greenspace is associated with a  
25 slower decline in physical activity in older adults: A prospective cohort study. *SSM Popul*  
26 *Health* 2016;2:683-91. doi: 10.1016/j.ssmph.2016.09.006 [published Online First:  
27 2016/12/27]  
28  
29  
30 37. Bancroft C, Joshi S, Rundle A, et al. Association of proximity and density of parks and  
31 objectively measured physical activity in the United States: A systematic review. *Soc Sci*  
32 *Med* 2015;138:22-30. doi: 10.1016/j.socscimed.2015.05.034 [published Online First:  
33 2015/06/05]  
34  
35  
36 38. Tan ZS, Spartano NL, Beiser AS, et al. Physical Activity, Brain Volume, and Dementia Risk:  
37 The Framingham Study. *J Gerontol A Biol Sci Med Sci* 2017;72(6):789-95. doi:  
38 10.1093/gerona/glw130 [published Online First: 2016/07/17]  
39  
40  
41 39. Kirk-Sanchez NJ, McGough EL. Physical exercise and cognitive performance in the elderly:  
42 current perspectives. *Clin Interv Aging* 2014;9:51-62. doi: 10.2147/CIA.S39506  
43 [published Online First: 2014/01/01]  
44  
45  
46  
47  
48  
49  
50  
51  
52  
53  
54  
55  
56  
57  
58  
59  
60

- 1  
2  
3 40. Jennings V, Bamkole O. The Relationship between Social Cohesion and Urban Green  
4  
5 Space: An Avenue for Health Promotion. *Int J Environ Res Public Health* 2019;16(3) doi:  
6  
7 10.3390/ijerph16030452 [published Online First: 2019/02/06]  
8  
9 41. Krueger KR, Wilson RS, Kamenetsky JM, et al. Social engagement and cognitive function in  
10  
11 old age. *Exp Aging Res* 2009;35(1):45-60. doi: 10.1080/03610730802545028  
12  
13 42. Marioni RE, Proust-Lima C, Amieva H, et al. Social activity, cognitive decline and dementia  
14  
15 risk: a 20-year prospective cohort study. *BMC Public Health* 2015;15:1089. doi:  
16  
17 10.1186/s12889-015-2426-6 [published Online First: 2015/10/27]  
18  
19 43. Midouhas E, Kokosi T, Flouri E. Neighbourhood-level air pollution and greenspace and  
20  
21 inflammation in adults. *Health Place* 2019;58:102167. doi:  
22  
23 10.1016/j.healthplace.2019.102167 [published Online First: 2019/07/22]  
24  
25 44. Datzmann T, Markevych I, Trautmann F, et al. Outdoor air pollution, green space, and  
26  
27 cancer incidence in Saxony: a semi-individual cohort study. *BMC Public Health*  
28  
29 2018;18(1):715. doi: 10.1186/s12889-018-5615-2 [published Online First: 2018/06/10]  
30  
31 45. Peters R, Ee N, Peters J, et al. Air Pollution and Dementia: A Systematic Review. *J*  
32  
33 *Alzheimers Dis* 2019 doi: 10.3233/JAD-180631 [published Online First: 2019/02/19]  
34  
35 46. Block ML, Calderon-Garciduenas L. Air pollution: mechanisms of neuroinflammation and  
36  
37 CNS disease. *Trends Neurosci* 2009;32(9):506-16. doi: 10.1016/j.tins.2009.05.009  
38  
39 [published Online First: 2009/09/01]  
40  
41 47. Grant MJ, Booth A. A typology of reviews: an analysis of 14 review types and associated  
42  
43 methodologies. *Health Info Libr J* 2009;26(2):91-108. doi: 10.1111/j.1471-  
44  
45 1842.2009.00848.x [published Online First: 2009/06/06]  
46  
47 48. Arksey H, O'Malley L. Scoping studies: towards a methodological framework. *International*  
48  
49 *Journal of Social Research Methodology* 2005;8(1):19-32.  
50  
51  
52  
53  
54  
55  
56  
57  
58  
59  
60



- 1  
2  
3 49. Peters MD, Godfrey CM, Khalil H, et al. Guidance for conducting systematic scoping  
4  
5 reviews. *Int J Evid Based Healthc* 2015;13(3):141-6. doi:  
6  
7 10.1097/XEB.0000000000000050 [published Online First: 2015/07/03]  
8  
9  
10 50. Zhang JG, Yu ZW, Zhao B, et al. Links between green space and public health: a  
11  
12 bibliometric review of global research trends and future prospects from 1901 to 2019.  
13  
14 *Environ Res Lett* 2020;15(6) doi: ARTN 063001  
15  
16 10.1088/1748-9326/ab7f64  
17  
18 51. Munn Z, Peters MDJ, Stern C, et al. Systematic review or scoping review? Guidance for  
19  
20 authors when choosing between a systematic or scoping review approach. *BMC Med*  
21  
22 *Res Methodol* 2018;18(1):143. doi: 10.1186/s12874-018-0611-x [published Online First:  
23  
24 2018/11/21]  
25  
26 52. Tricco AC, Antony J, Zarin W, et al. A scoping review of rapid review methods. *BMC Med*  
27  
28 2015;13:224. doi: 10.1186/s12916-015-0465-6 [published Online First: 2015/09/18]  
29  
30 53. Clarke PJ, Ailshire JA, House JS, et al. Cognitive function in the community setting: the  
31  
32 neighbourhood as a source of 'cognitive reserve'? *J Epidemiol Community Health*  
33  
34 2012;66(8):730-6. doi: 10.1136/jech.2010.128116  
35  
36 54. Dadvand P, Tischer C, Estarlich M, et al. Lifelong Residential Exposure to Green Space and  
37  
38 Attention: A Population-based Prospective Study. *Environ Health Perspect*  
39  
40 2017;125(9):097016. doi: 10.1289/EHP694 [published Online First: 2017/09/22]  
41  
42 55. de Keijzer C, Tonne C, Basagana X, et al. Residential Surrounding Greenness and  
43  
44 Cognitive Decline: A 10-Year Follow-up of the Whitehall II Cohort. *Environ Health*  
45  
46 *Perspect* 2018;126(7):077003. doi: 10.1289/EHP2875 [published Online First:  
47  
48 2018/07/22]  
49  
50 56. Flouri E, Papachristou E, Midouhas E. The role of neighbourhood greenspace in children's  
51  
52 spatial working memory. *Br J Educ Psychol* 2019;89(2):359-73. doi: 10.1111/bjep.12243  
53  
54 [published Online First: 2018/09/07]  
55  
56  
57  
58  
59  
60

- 1  
2  
3 57. Hystad P PY, Noisel N, Boileau C. Green space associations with mental health and  
4  
5 cognitive function: Results from the Quebec CARTaGENE cohort. *Environmental*  
6  
7 *Epidemiology* 2019;3:e040.  
8
- 9 58. Wu YT, Prina AM, Jones A, et al. The Built Environment and Cognitive Disorders: Results  
10  
11 From the Cognitive Function and Ageing Study II. *Am J Prev Med* 2017 doi:  
12  
13 10.1016/j.amepre.2016.11.020 [published Online First: 2017/01/09]  
14  
15
- 16 59. Wu YT, Prina AM, Jones AP, et al. Community environment, cognitive impairment and  
17  
18 dementia in later life: results from the Cognitive Function and Ageing Study. *Age Ageing*  
19  
20 2015;44(6):1005-11. doi: 10.1093/ageing/afv137 [published Online First: 2015/10/16]  
21  
22
- 23 60. Yuchi W, Sbihi H, Davies H, et al. Road proximity, air pollution, noise, green space and  
24  
25 neurologic disease incidence: a population-based cohort study. *Environ Health*  
26  
27 2020;19(1):8. doi: 10.1186/s12940-020-0565-4 [published Online First: 2020/01/23]  
28  
29
- 30 61. Zhu A, Yan L, Shu C, et al. APOE epsilon4 Modifies Effect of Residential Greenness on  
31  
32 Cognitive Function among Older Adults: A Longitudinal Analysis in China. *Sci Rep*  
33  
34 2020;10(1):82. doi: 10.1038/s41598-019-57082-7 [published Online First: 2020/01/11]  
35  
36
- 37 62. Zijlema WL, Triguero-Mas M, Smith G, et al. The relationship between natural outdoor  
38  
39 environments and cognitive functioning and its mediators. *Environmental research*  
40  
41 2017;155:268-75. doi: 10.1016/j.envres.2017.02.017 [published Online First:  
42  
43 2017/03/04]  
44  
45
- 46 63. Cherrie MPC, Shortt NK, Mitchell RJ, et al. Green space and cognitive ageing: A  
47  
48 retrospective life course analysis in the Lothian Birth Cohort 1936. *Soc Sci Med*  
49  
50 2018;196:56-65. doi: 10.1016/j.socscimed.2017.10.038 [published Online First:  
51  
52 2017/11/13]  
53  
54
- 55 64. Cherrie MPC, Shortt NK, Ward Thompson C, et al. Association Between the Activity Space  
56  
57 Exposure to Parks in Childhood and Adolescence and Cognitive Aging in Later Life. *Int J*  
58  
59  
60

- 1  
2  
3 *Environ Res Public Health* 2019;16(4) doi: 10.3390/ijerph16040632 [published Online  
4  
5 First: 2019/02/24]  
6
- 7 65. Dadvand P, Nieuwenhuijsen MJ, Esnaola M, et al. Green spaces and cognitive development  
8  
9 in primary schoolchildren. *Proceedings of the National Academy of Sciences of the*  
10  
11 *United States of America* 2015;112(26):7937-42. doi: 10.1073/pnas.1503402112  
12  
13 [published Online First: 2015/06/17]  
14
- 15 66. Dadvand P, Pujol J, Macia D, et al. The Association between Lifelong Greenspace  
16  
17 Exposure and 3-Dimensional Brain Magnetic Resonance Imaging in Barcelona  
18  
19 Schoolchildren. *Environ Health Perspect* 2018;126(2):027012. doi: 10.1289/EHP1876  
20  
21 [published Online First: 2018/03/06]  
22  
23
- 24 67. Liao J, Zhang B, Xia W, et al. Residential exposure to green space and early childhood  
25  
26 neurodevelopment. *Environ Int* 2019;128:70-76. doi: 10.1016/j.envint.2019.03.070  
27  
28 [published Online First: 2019/04/29]  
29
- 30 68. Reuben A, Arseneault L, Belsky DW, et al. Residential neighborhood greenery and  
31  
32 children's cognitive development. *Soc Sci Med* 2019;230:271-79. doi:  
33  
34 10.1016/j.socscimed.2019.04.029 [published Online First: 2019/04/30]  
35  
36
- 37 69. Wang D, Lau KK, Yu R, et al. Neighbouring green space and mortality in community-  
38  
39 dwelling elderly Hong Kong Chinese: a cohort study. *BMJ open* 2017;7(7):e015794. doi:  
40  
41 10.1136/bmjopen-2016-015794 [published Online First: 2017/08/03]  
42
- 43 70. Ward JS, Duncan JS, Jarden A, et al. The impact of children's exposure to greenspace on  
44  
45 physical activity, cognitive development, emotional wellbeing, and ability to appraise risk.  
46  
47 *Health Place* 2016;40:44-50. doi: 10.1016/j.healthplace.2016.04.015 [published Online  
48  
49 First: 2016/05/15]  
50
- 51 71. Yu R, Wang D, Leung J, et al. Is Neighborhood Green Space Associated With Less Frailty?  
52  
53 Evidence From the Mr. and Ms. Os (Hong Kong) Study. *Journal of the American Medical*  
54  
55

- 1  
2  
3 *Directors Association* 2018;19(6):528-34. doi: 10.1016/j.jamda.2017.12.015 [published  
4  
5 Online First: 2018/02/07]  
6  
7 72. Dzhambov AM, Bahchevanov KM, Chompalov KA, et al. A feasibility study on the  
8  
9 association between residential greenness and neurocognitive function in middle-aged  
10  
11 Bulgarians. *Arhiv Za Higijenu Rada I Toksikologiju-Archives of Industrial Hygiene and*  
12  
13 *Toxicology* 2019;70(3):173-85. doi: 10.2478/aiht-2019-70-3326  
14  
15  
16 73. Kuhn S, Duzel S, Eibich P, et al. In search of features that constitute an "enriched  
17  
18 environment" in humans: Associations between geographical properties and brain  
19  
20 structure. *Scientific reports* 2017;7 doi: ARTN 11920  
21  
22 10.1038/s41598-017-12046-7  
23  
24 74. Wong B, Lucente DE, MacLean J, et al. Diagnostic evaluation and monitoring of patients  
25  
26 with posterior cortical atrophy. *Neurodegener Dis Manag* 2019;9(4):217-39. doi:  
27  
28 10.2217/nmt-2018-0052 [published Online First: 2019/08/09]  
29  
30  
31 75. Rogalski E, Sridhar J, Rader B, et al. Aphasic variant of Alzheimer disease: Clinical,  
32  
33 anatomic, and genetic features. *Neurology* 2016;87(13):1337-43. doi:  
34  
35 10.1212/WNL.0000000000003165 [published Online First: 2016/08/28]  
36  
37 76. Krell-Roesch J, Vemuri P, Pink A, et al. Association Between Mentally Stimulating Activities  
38  
39 in Late Life and the Outcome of Incident Mild Cognitive Impairment, With an Analysis of  
40  
41 the APOE epsilon4 Genotype. *JAMA Neurol* 2017;74(3):332-38. doi:  
42  
43 10.1001/jamaneurol.2016.3822 [published Online First: 2017/01/31]  
44  
45  
46 77. Cleary EG, Cifuentes M, Grinstein G, et al. Association of Low-Level Ozone with Cognitive  
47  
48 Decline in Older Adults. *J Alzheimers Dis* 2018;61(1):67-78. doi: 10.3233/JAD-170658  
49  
50 [published Online First: 2017/11/06]  
51  
52 78. Podewils LJ, Guallar E, Kuller LH, et al. Physical activity, APOE genotype, and dementia  
53  
54 risk: findings from the Cardiovascular Health Cognition Study. *Am J Epidemiol*  
55  
56 2005;161(7):639-51. doi: 10.1093/aje/kwi092 [published Online First: 2005/03/23]  
57  
58  
59

- 1  
2  
3 79. Chin AL, Negash S, Hamilton R. Diversity and disparity in dementia: the impact of  
4  
5 ethnoracial differences in Alzheimer disease. *Alzheimer Dis Assoc Disord*  
6  
7 2011;25(3):187-95. doi: 10.1097/WAD.0b013e318211c6c9 [published Online First:  
8  
9 2011/03/15]  
10  
11 80. Ledig C, Schuh A, Guerrero R, et al. Structural brain imaging in Alzheimer's disease and  
12  
13 mild cognitive impairment: biomarker analysis and shared morphometry database. *Sci*  
14  
15 *Rep* 2018;8(1):11258. doi: 10.1038/s41598-018-29295-9 [published Online First:  
16  
17 2018/07/28]  
18  
19 81. Besser L, Mitsova D. Associations between neighborhood green land cover and  
20  
21 neighborhood-based walking among US older adults. *Am J Prev Med*. In press.  
22  
23 82. Frost R, McClurg D, Brady M, et al. Optimising the validity and completion of adherence  
24  
25 diaries: a multiple case study and randomised crossover trial. *Trials* 2016;17(1):489. doi:  
26  
27 10.1186/s13063-016-1615-7 [published Online First: 2016/10/12]  
28  
29 83. Evenson KR, Wen F, Hillier A, et al. Assessing the contribution of parks to physical activity  
30  
31 using global positioning system and accelerometry. *Med Sci Sports Exerc*  
32  
33 2013;45(10):1981-7. doi: 10.1249/MSS.0b013e318293330e [published Online First:  
34  
35 2013/03/28]  
36  
37 84. Hirsch JA, Winters M, Clarke P, et al. Generating GPS activity spaces that shed light upon  
38  
39 the mobility habits of older adults: a descriptive analysis. *International Journal of Health*  
40  
41 *Geographics* 2014;13 doi: 10.1186/1476-072x-13-51  
42  
43 85. James P, Hart JE, Hipp JA, et al. GPS-Based Exposure to Greenness and Walkability and  
44  
45 Accelerometry-Based Physical Activity. *Cancer Epidemiol Biomarkers Prev*  
46  
47 2017;26(4):525-32. doi: 10.1158/1055-9965.EPI-16-0925 [published Online First:  
48  
49 2017/02/16]  
50  
51 86. Zenk SN, Matthews SA, Kraft AN, et al. How many days of global positioning system (GPS)  
52  
53 monitoring do you need to measure activity space environments in health research?  
54  
55  
56  
57  
58  
59  
60

- 1  
2  
3 *Health Place* 2018;51:52-60. doi: 10.1016/j.healthplace.2018.02.004 [published Online  
4  
5 First: 2018/03/20]
- 6  
7 87. Montine TJ, Cholerton BA, Corrada MM, et al. Concepts for brain aging: resistance,  
8  
9 resilience, reserve, and compensation. *Alzheimers Res Ther* 2019;11(1):22. doi:  
10  
11 10.1186/s13195-019-0479-y [published Online First: 2019/03/13]
- 12  
13 88. Letellier N, Gutierrez LA, Carriere I, et al. Sex-specific association between neighborhood  
14  
15 characteristics and dementia: The Three-City cohort. *Alzheimers Dement*  
16  
17 2018;14(4):473-82. doi: 10.1016/j.jalz.2017.09.015 [published Online First: 2017/11/06]
- 18  
19 89. Anstey KJ, Cherbuin N, Budge M, et al. Body mass index in midlife and late-life as a risk  
20  
21 factor for dementia: a meta-analysis of prospective studies. *Obes Rev* 2011;12(5):e426-  
22  
23 37. doi: 10.1111/j.1467-789X.2010.00825.x [published Online First: 2011/02/26]
- 24  
25 90. Joas E, Bäckman K, Gustafson D, et al. Blood pressure trajectories from midlife to late life in  
26  
27 relation to dementia in women followed for 37 years. *Hypertension* 2012;59(4):796-801.  
28  
29 doi: 10.1161/hypertensionaha.111.182204
- 30  
31 91. Irwin K, Sexton C, Daniel T, et al. Healthy Aging and Dementia: Two Roads Diverging in  
32  
33 Midlife? *Front Aging Neurosci* 2018;10:275. doi: 10.3389/fnagi.2018.00275 [published  
34  
35 Online First: 2018/10/05]
- 36  
37 92. Brown BM, Peiffer J, Rainey-Smith SR. Exploring the relationship between physical activity,  
38  
39 beta-amyloid and tau: A narrative review. *Ageing Res Rev* 2019;50:9-18. doi:  
40  
41 10.1016/j.arr.2019.01.003 [published Online First: 2019/01/08]
- 42  
43 93. Dzhambov AM, Browning MHEM, Markevych I, et al. Analytical approaches to testing  
44  
45 pathways linking greenspace to health: A scoping review of the empirical literature.  
46  
47  
48  
49 *Environmental Research* 2020;186 doi: ARTN 109613  
50  
51 10.1016/j.envres.2020.109613  
52  
53  
54  
55  
56  
57  
58  
59  
60

## Figure titles and captions

### Figure 1

Title: Sample size flow diagram

Caption: See Supplemental Figure 1 for full details.

### Figure 2

Title: Number of studies by country

Caption: Abbreviations: UK = United Kingdom, US = United States

### Figure 3

Title: Number of studies by age group

Caption: Abbreviation: Yrs = years

### Figure 4

Title: Number of studies by green space-brain health association

Caption: Abbreviations/definitions: Cog = cognition; MRI = magnetic resonance imaging; Dx = diagnosis of cognitive impairment/dementia; Greenness = measure of greenness such as Normalized Difference Vegetation Index, % Green space = Percent or amount of neighborhood composed of green space/park space; Other green space = time spent in green space, distance to nearest green/park space, and/or self-reported measures

Table 1. Summary of green space-brain health associations by age group

| Citation <sup>a</sup> | Sample size | Population based/<br>random sample | Location                  | Children<br>(<18 years) | Adults<br>(18-64 years) | Older adults<br>(≥65 years) |
|-----------------------|-------------|------------------------------------|---------------------------|-------------------------|-------------------------|-----------------------------|
| Brown (2018)          | 249,405     | Yes                                | US                        |                         |                         | +                           |
| Cherrie (2018)        | 281         | Yes                                | UK                        | N                       | N                       | +                           |
| Cherrie (2019)        | 281         | Yes                                | UK                        |                         |                         | + N                         |
| Clarke (2012)         | 949         | Yes                                | US                        |                         | N                       | N                           |
| Dadvand (2015)        | 2,593       | No                                 | Spain                     | + N                     |                         |                             |
| Dadvand (2017)        | 987         | Yes                                | Spain                     | + N                     |                         |                             |
| Dadvand (2018)        | 253         | No                                 | Spain                     | + N                     |                         |                             |
| Dzhambov (2019)       | 112         | No                                 | Bulgaria                  |                         | +N                      |                             |
| De Keijzer (2018)     | 6,506       | Yes                                | UK                        |                         | + N                     | + N                         |
| Flouri (2019)         | 4,758       | Yes                                | UK                        | +                       |                         |                             |
| Hystad (2019)         | 6,658       | Yes                                | Canada                    |                         | - N                     |                             |
| Kuhn (2017)           | 341         | No                                 | Germany                   |                         |                         | +N                          |
| Liao (2019)           | 1,312       | No                                 | China                     | +                       |                         |                             |
| Reuben (2019)         | 1,658       | Yes                                | UK                        | N                       |                         |                             |
| Wang (2017)           | 3,544       | No                                 | China                     |                         |                         | N                           |
| Ward (2016)           | 72          | No                                 | New Zealand               | N                       |                         |                             |
| Wu (2015)             | 2,424       | Yes                                | UK                        |                         |                         | -                           |
| Wu (2017)             | 7,505       | Yes                                | UK                        |                         |                         | - N                         |
| Yu (2018)             | 3,240       | No                                 | China                     |                         |                         | N                           |
| Yuchi (2020)          | 678,000     | Yes                                | Canada                    |                         | + -                     | + -                         |
| Zhu (2020)            | 6,994       | Yes                                | China                     |                         |                         | +                           |
| Zijlema (2017)        | 1,628       | Yes                                | Spain, UK,<br>Netherlands |                         | + N                     | + N                         |
|                       |             | Studies with positive associations |                           | 5                       | 4                       | 8                           |
|                       |             | Studies with inverse associations  |                           | 0                       | 2                       | 3                           |
|                       |             | Studies with null associations     |                           | 6                       | 6                       | 8                           |
|                       |             | Total studies                      |                           | 8                       | 7                       | 13                          |

Abbreviations: US = United States; UK = United Kingdom; + = positive association; - = inverse association; N = null association

<sup>a</sup> Full list of papers found in Supplemental Text 1



Table 2. Summary of green space-brain health associations by green space measure

| Citation <sup>a</sup> | Sample size | Pop. based/<br>random sample | Location                           | Longitudinal green space | Greenness (NDVI, EVI) | Percent/<br>area park space | Percent green space | Time spent in green space | Distance to natural outdoor environment | Other green space |
|-----------------------|-------------|------------------------------|------------------------------------|--------------------------|-----------------------|-----------------------------|---------------------|---------------------------|-----------------------------------------|-------------------|
| Brown (2018)          | 249,405     | Yes                          | US                                 | No                       | +                     |                             |                     |                           |                                         |                   |
| Cherrie (2018)        | 281         | Yes                          | UK                                 | Yes                      |                       | + N                         |                     |                           |                                         |                   |
| Cherrie (2019)        | 281         | Yes                          | UK                                 | Yes                      |                       | + N                         |                     |                           |                                         |                   |
| Clarke (2012)         | 949         | Yes                          | US                                 | No                       |                       | N                           |                     |                           |                                         |                   |
| Dadvand (2015)        | 2,593       | No                           | Spain                              | No                       | + N                   |                             |                     |                           |                                         |                   |
| Dadvand (2017)        | 987         | Yes                          | Spain                              | Yes                      | + N                   |                             |                     |                           |                                         |                   |
| Dadvand (2018)        | 253         | No                           | Spain                              | Yes                      | + N                   |                             |                     |                           |                                         |                   |
| Dzhambov (2019)       | 112         | No                           | Bulgaria                           | No                       | + N                   |                             |                     |                           |                                         |                   |
| De Keijzer (2018)     | 6,506       | Yes                          | UK                                 | Yes                      | + N                   |                             |                     |                           |                                         |                   |
| Flouri (2019)         | 4,758       | Yes                          | UK                                 | No                       |                       |                             | +                   |                           |                                         |                   |
| Hystad (2019)         | 6,658       | Yes                          | Canada                             | Yes                      | - N                   |                             |                     |                           |                                         |                   |
| Kuhn (2017)           | 341         | No                           | Germany                            | No                       |                       |                             | +N                  |                           |                                         |                   |
| Liao (2019)           | 1,312       | No                           | China                              | No                       | +                     |                             |                     |                           |                                         |                   |
| Reuben (2019)         | 1,658       | Yes                          | UK                                 | Yes                      | N                     |                             |                     |                           |                                         |                   |
| Wang (2017)           | 3,544       | No                           | China                              | No                       | N                     |                             |                     |                           |                                         |                   |
| Ward (2016)           | 72          | No                           | New Zealand                        | No                       |                       |                             |                     | N                         |                                         |                   |
| Wu (2015)             | 2,424       | Yes                          | UK                                 | No                       |                       |                             | -                   |                           |                                         |                   |
| Wu (2017)             | 7,505       | Yes                          | UK                                 | No                       |                       |                             | - N                 |                           |                                         |                   |
| Yu (2018)             | 3,240       | No                           | China                              | No                       | N                     |                             |                     |                           |                                         |                   |
| Yuchi (2020)          | 678,000     | Yes                          | Canada                             | Yes                      | + -                   |                             |                     |                           |                                         |                   |
| Zhu (2020)            | 6,994       | Yes                          | China                              | Yes                      | +                     |                             |                     |                           |                                         |                   |
| Zijlema (2017)        | 1,628       | Yes                          | Spain, UK, Netherlands             | No                       | N                     |                             |                     | N                         | +                                       | N                 |
|                       |             |                              | Studies with positive associations |                          | 9                     | 2                           | 2                   | 0                         | 1                                       | 0                 |
|                       |             |                              | Studies with inverse associations  |                          | 2                     | 0                           | 2                   | 0                         | 0                                       | 0                 |
|                       |             |                              | Studies with null associations     |                          | 10                    | 3                           | 2                   | 2                         | 0                                       | 1                 |
|                       |             |                              | Total studies                      |                          | 14                    | 3                           | 4                   | 2                         | 1                                       | 1                 |

Abbreviations: NDVI = normalized difference vegetation index; EVI = enhanced vegetation index; US = United States; UK = United Kingdom; + = positive association; - = inverse association; N = null association

<sup>a</sup> Full list of papers found in Supplemental Text 1

Table 3. Summary of green space-brain health associations by brain health measure

| Citation <sup>a</sup> | Sample size | Population based / random sample | Location                           | Longitudinal brain health measure | Cognition | MRI brain regions | Diagnosis of cognitive impairment/ dementia |
|-----------------------|-------------|----------------------------------|------------------------------------|-----------------------------------|-----------|-------------------|---------------------------------------------|
| Brown (2018)          | 249,405     | Yes                              | US                                 | No                                |           |                   | +                                           |
| Cherrie (2018)        | 281         | Yes                              | UK                                 | Yes                               | + N       |                   |                                             |
| Cherrie (2019)        | 281         | Yes                              | UK                                 | Yes                               | + N       |                   |                                             |
| Clarke (2012)         | 949         | Yes                              | US                                 | No                                | N         |                   |                                             |
| Dadvand (2015)        | 2,593       | No                               | Spain                              | Yes                               | + N       |                   |                                             |
| Dadvand (2017)        | 987         | Yes                              | Spain                              | Yes                               | + N       |                   |                                             |
| Dadvand (2018)        | 253         | No                               | Spain                              | No                                |           | + N               |                                             |
| Dzhambov (2019)       | 112         | No                               | Bulgaria                           | No                                | +         | +N                |                                             |
| De Keijzer (2018)     | 6,506       | Yes                              | UK                                 | Yes                               | + N       |                   |                                             |
| Flouri (2019)         | 4,758       | Yes                              | UK                                 | No                                | +         |                   |                                             |
| Hystad (2019)         | 6,658       | Yes                              | Canada                             | No                                | - N       |                   |                                             |
| Kuhn (2017)           | 341         | No                               | Germany                            | No                                |           | +N                |                                             |
| Liao (2019)           | 1,312       | No                               | China                              | No                                | +         |                   |                                             |
| Reuben (2019)         | 1,658       | Yes                              | UK                                 | Yes                               | N         |                   |                                             |
| Wang (2017)           | 3,544       | No                               | China                              | No                                | N         |                   |                                             |
| Ward (2016)           | 72          | No                               | New Zealand                        | No                                | N         |                   |                                             |
| Wu (2015)             | 2,424       | Yes                              | UK                                 | No                                |           |                   | -                                           |
| Wu (2017)             | 7,505       | Yes                              | UK                                 | No                                |           |                   | - N                                         |
| Yu (2018)             | 3,240       | No                               | China                              | No                                | N         |                   |                                             |
| Yuchi (2020)          | 678,000     | Yes                              | Canada                             | Yes                               |           |                   | + -                                         |
| Zhu (2020)            | 6,994       | Yes                              | China                              | Yes                               |           |                   | +                                           |
| Zijlema (2017)        | 1,628       | Yes                              | Spain, UK, Netherlands             | No                                | + N       |                   |                                             |
|                       |             |                                  | Studies with positive associations |                                   | 9         | 3                 | 3                                           |
|                       |             |                                  | Studies with inverse associations  |                                   | 1         | 0                 | 3                                           |
|                       |             |                                  | Studies with null associations     |                                   | 12        | 3                 | 1                                           |
|                       |             |                                  | Total studies                      |                                   | 15        | 3                 | 5                                           |

Abbreviations: + = positive association; - = inverse association; N = null association; US = United States; UK = United Kingdom

<sup>a</sup> Full list of papers found in Supplemental Text 1

Table 4. Findings by green space-brain health association investigated and author name

| Green space measure <sup>h</sup> | Cognition            |        |                      | MRI                  |   |                      | Diagnosis of cognitive impairment/dementia |                 |                 |
|----------------------------------|----------------------|--------|----------------------|----------------------|---|----------------------|--------------------------------------------|-----------------|-----------------|
|                                  | +                    | -      | N                    | +                    | - | N                    | +                                          | -               | N               |
| Greenness/ NDVI                  | Dadvand <sup>a</sup> | Hystad | Dadvand <sup>a</sup> | Dadvand <sup>c</sup> |   | Dadvand <sup>c</sup> | Yuchi                                      | Yuchi           |                 |
|                                  | Dadvand <sup>b</sup> |        | Dadvand <sup>b</sup> | Dzhambov             |   | Dzhambov             | Brown                                      |                 |                 |
|                                  | Liao                 |        | Reuben               |                      |   |                      |                                            |                 |                 |
|                                  | De Keijzer           |        | De Keijzer           |                      |   |                      |                                            |                 |                 |
|                                  | Zhu                  |        | Hystad               |                      |   |                      |                                            |                 |                 |
|                                  | Dzhambov             |        | Zijlema              |                      |   |                      |                                            |                 |                 |
| Percent green/ park space        | Cherrie <sup>d</sup> |        | Cherrie <sup>d</sup> | Kuhn                 |   | Kuhn                 |                                            | Wu <sup>f</sup> | Wu <sup>g</sup> |
|                                  | Cherrie <sup>e</sup> |        | Cherrie <sup>e</sup> |                      |   |                      |                                            | Wu <sup>g</sup> |                 |
|                                  | Flouri               |        | Clarke               |                      |   |                      |                                            |                 |                 |
| Time spent in green space        |                      |        | Ward                 |                      |   |                      |                                            |                 |                 |
|                                  |                      |        | Zijlema              |                      |   |                      |                                            |                 |                 |
| Other                            | Zijlema              |        | Zijlema              |                      |   |                      |                                            |                 |                 |

Abbreviations: NDVI = normalized difference vegetation index; MRI = magnetic resonance imaging; + = positive association; - = inverse association; N = null association

Year of publication: <sup>a</sup>2015; <sup>b</sup>2017; <sup>c</sup>2018; <sup>d</sup>2018; <sup>e</sup>2019; <sup>f</sup>2015; <sup>g</sup>2017

<sup>h</sup> Full list of papers found in Supplemental Text 1

### Contributor statement

Dr. Besser is the sole author of this paper and as such completed all of the work, including data acquisition and interpretation, drafting and revising the paper for intellectual content, final approval of the version to be published, and agreement to be accountable for all aspects of the work.

For peer review only

1  
2  
3  
4  
5  
6  
7  
8  
9  
10  
11  
12  
13  
14  
15  
16  
17  
18  
19  
20  
21  
22  
23  
24  
25  
26  
27  
28  
29  
30  
31  
32  
33  
34  
35  
36  
37  
38  
39  
40  
41  
42  
43  
44  
45  
46  
47  
48  
49  
50  
51  
52  
53  
54  
55  
56  
57  
58  
59  
60

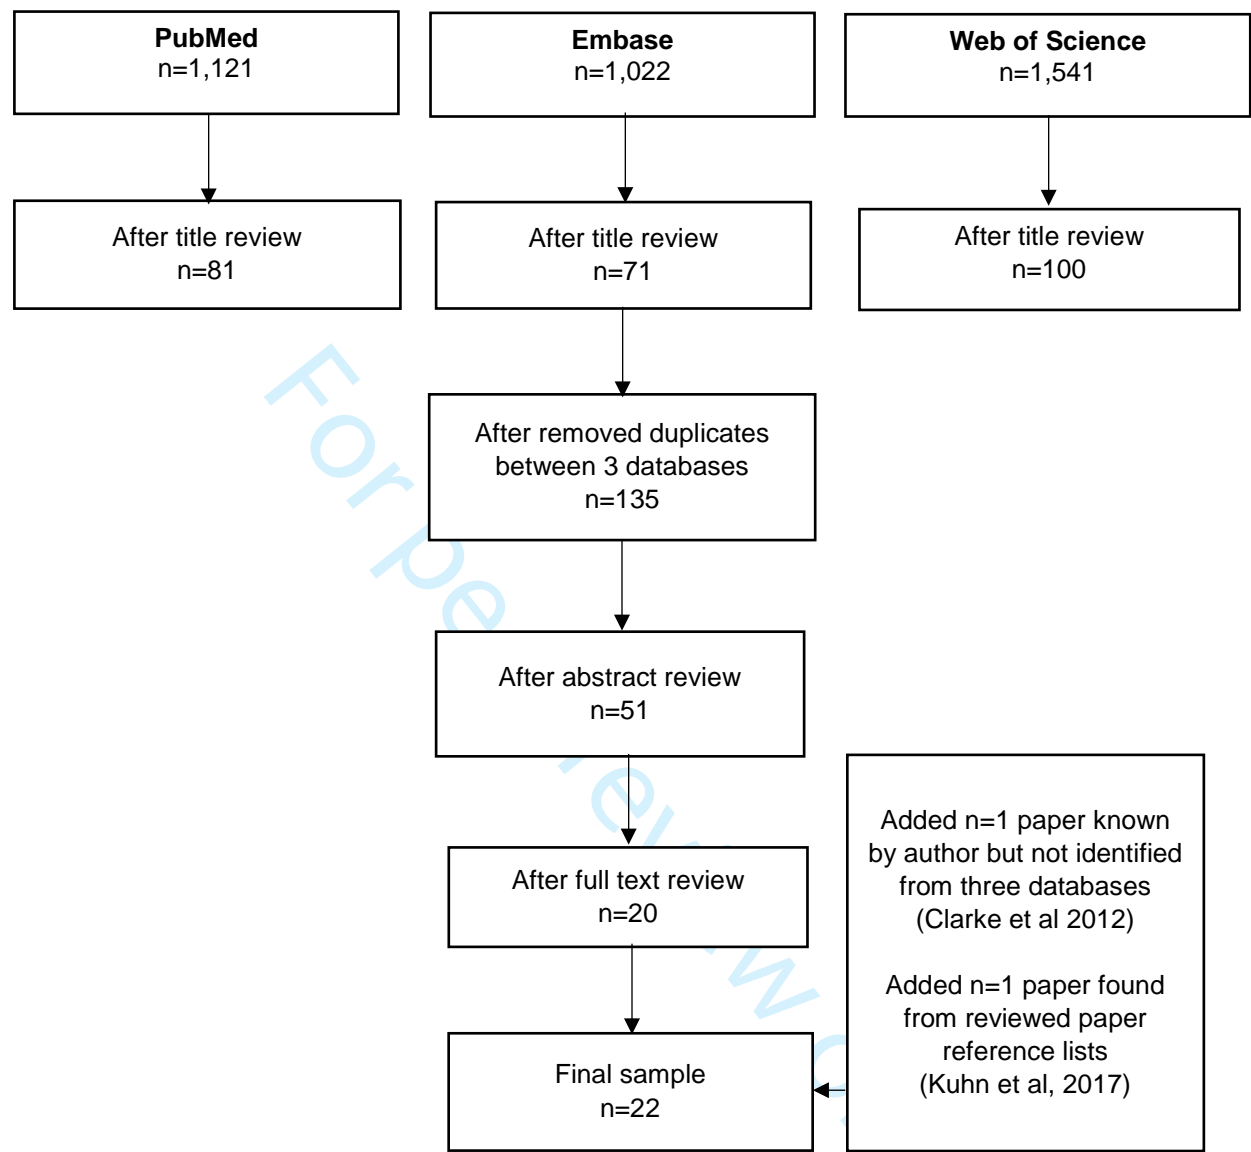

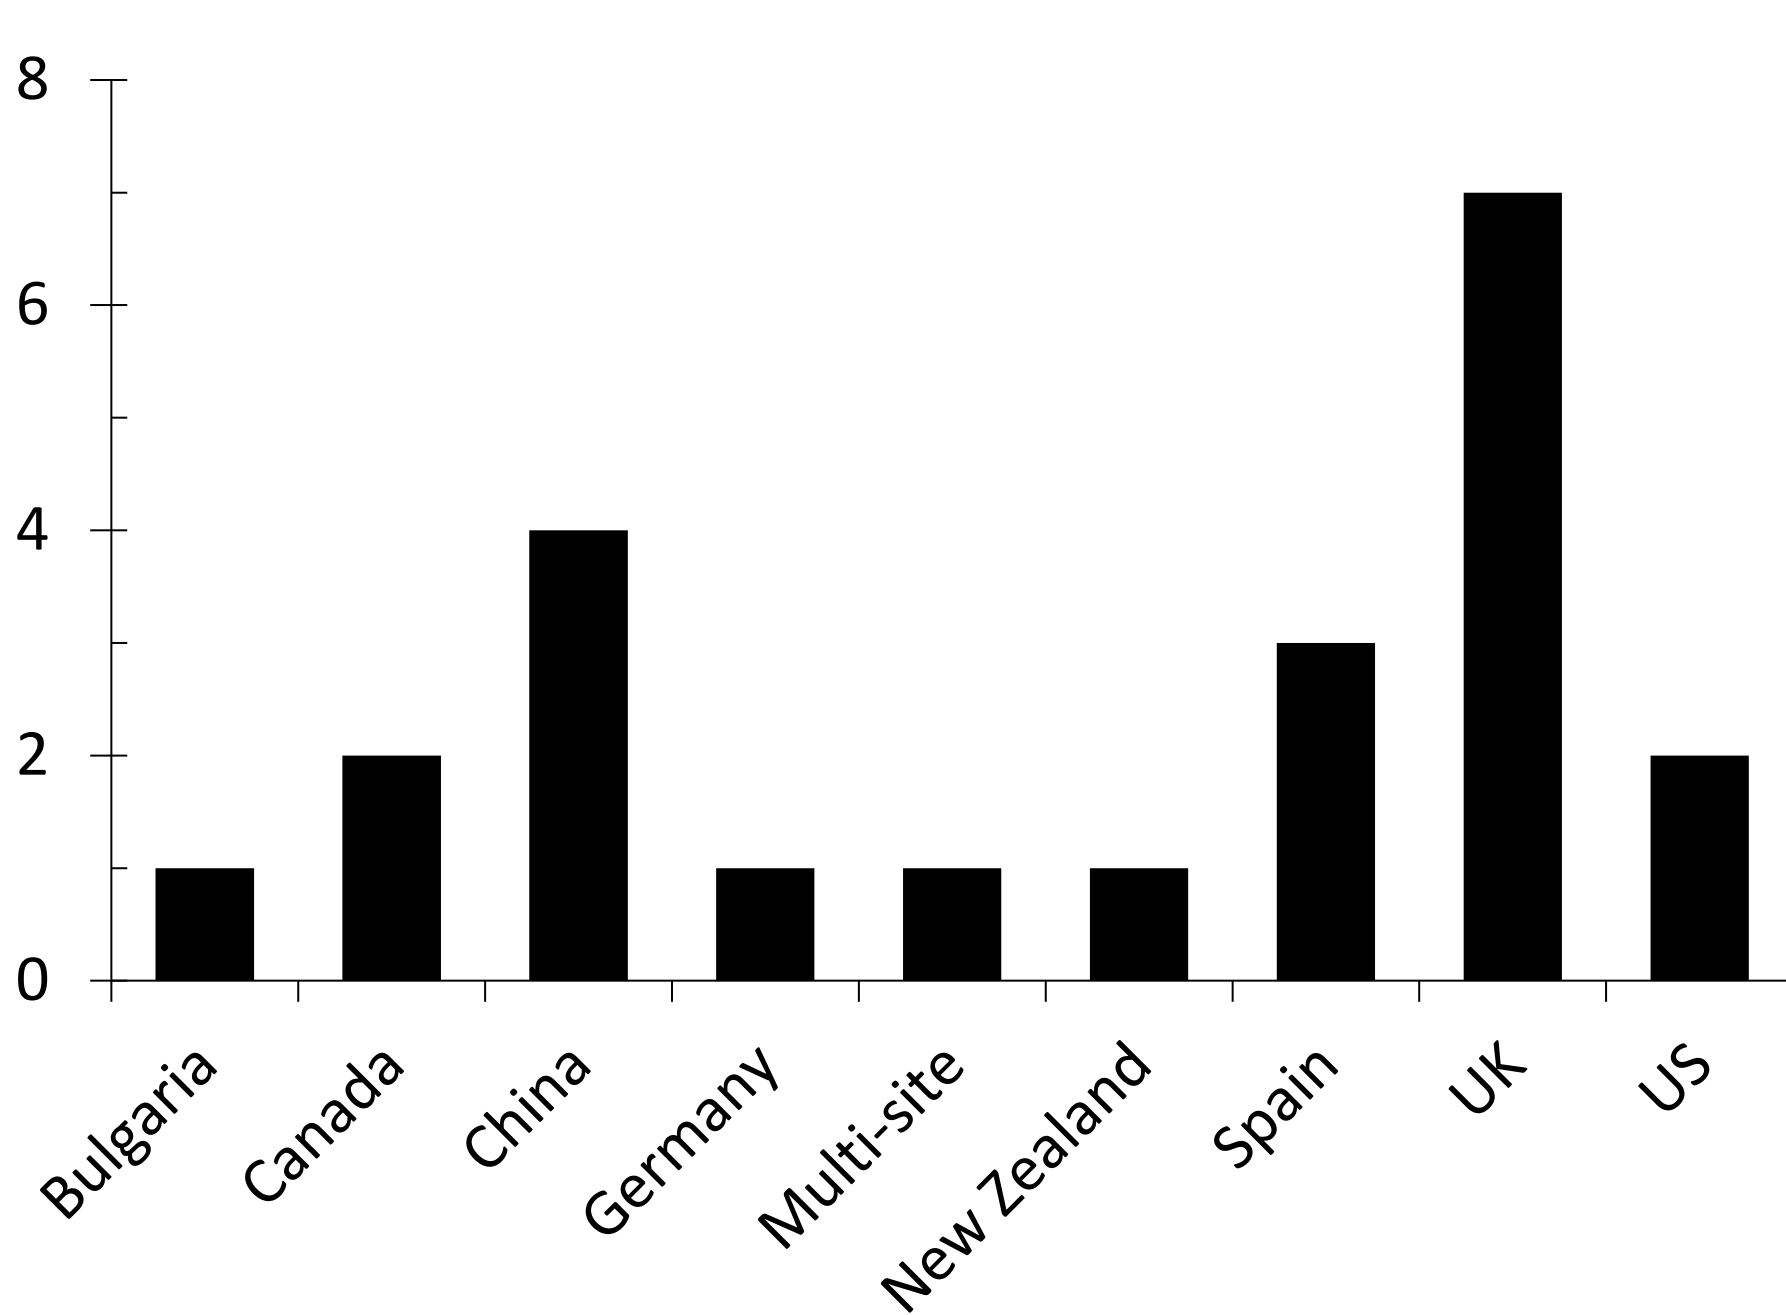

1  
2  
3  
4  
5  
6  
7  
8  
9  
10  
11  
12  
13  
14  
15  
16  
17  
18  
19  
20  
21  
22  
23  
24  
25  
26  
27  
28  
29  
30  
31  
32  
33  
34  
35  
36  
37  
38  
39  
40  
41  
42  
43  
44  
45  
46  
47

1  
2  
3  
4  
5  
6  
7  
8  
9  
10  
11  
12  
13  
14  
15  
16  
17  
18  
19  
20  
21  
22  
23  
24  
25  
26  
27  
28  
29  
30  
31  
32  
33  
34  
35  
36  
37  
38  
39  
40  
41  
42  
43  
44  
45  
46  
47

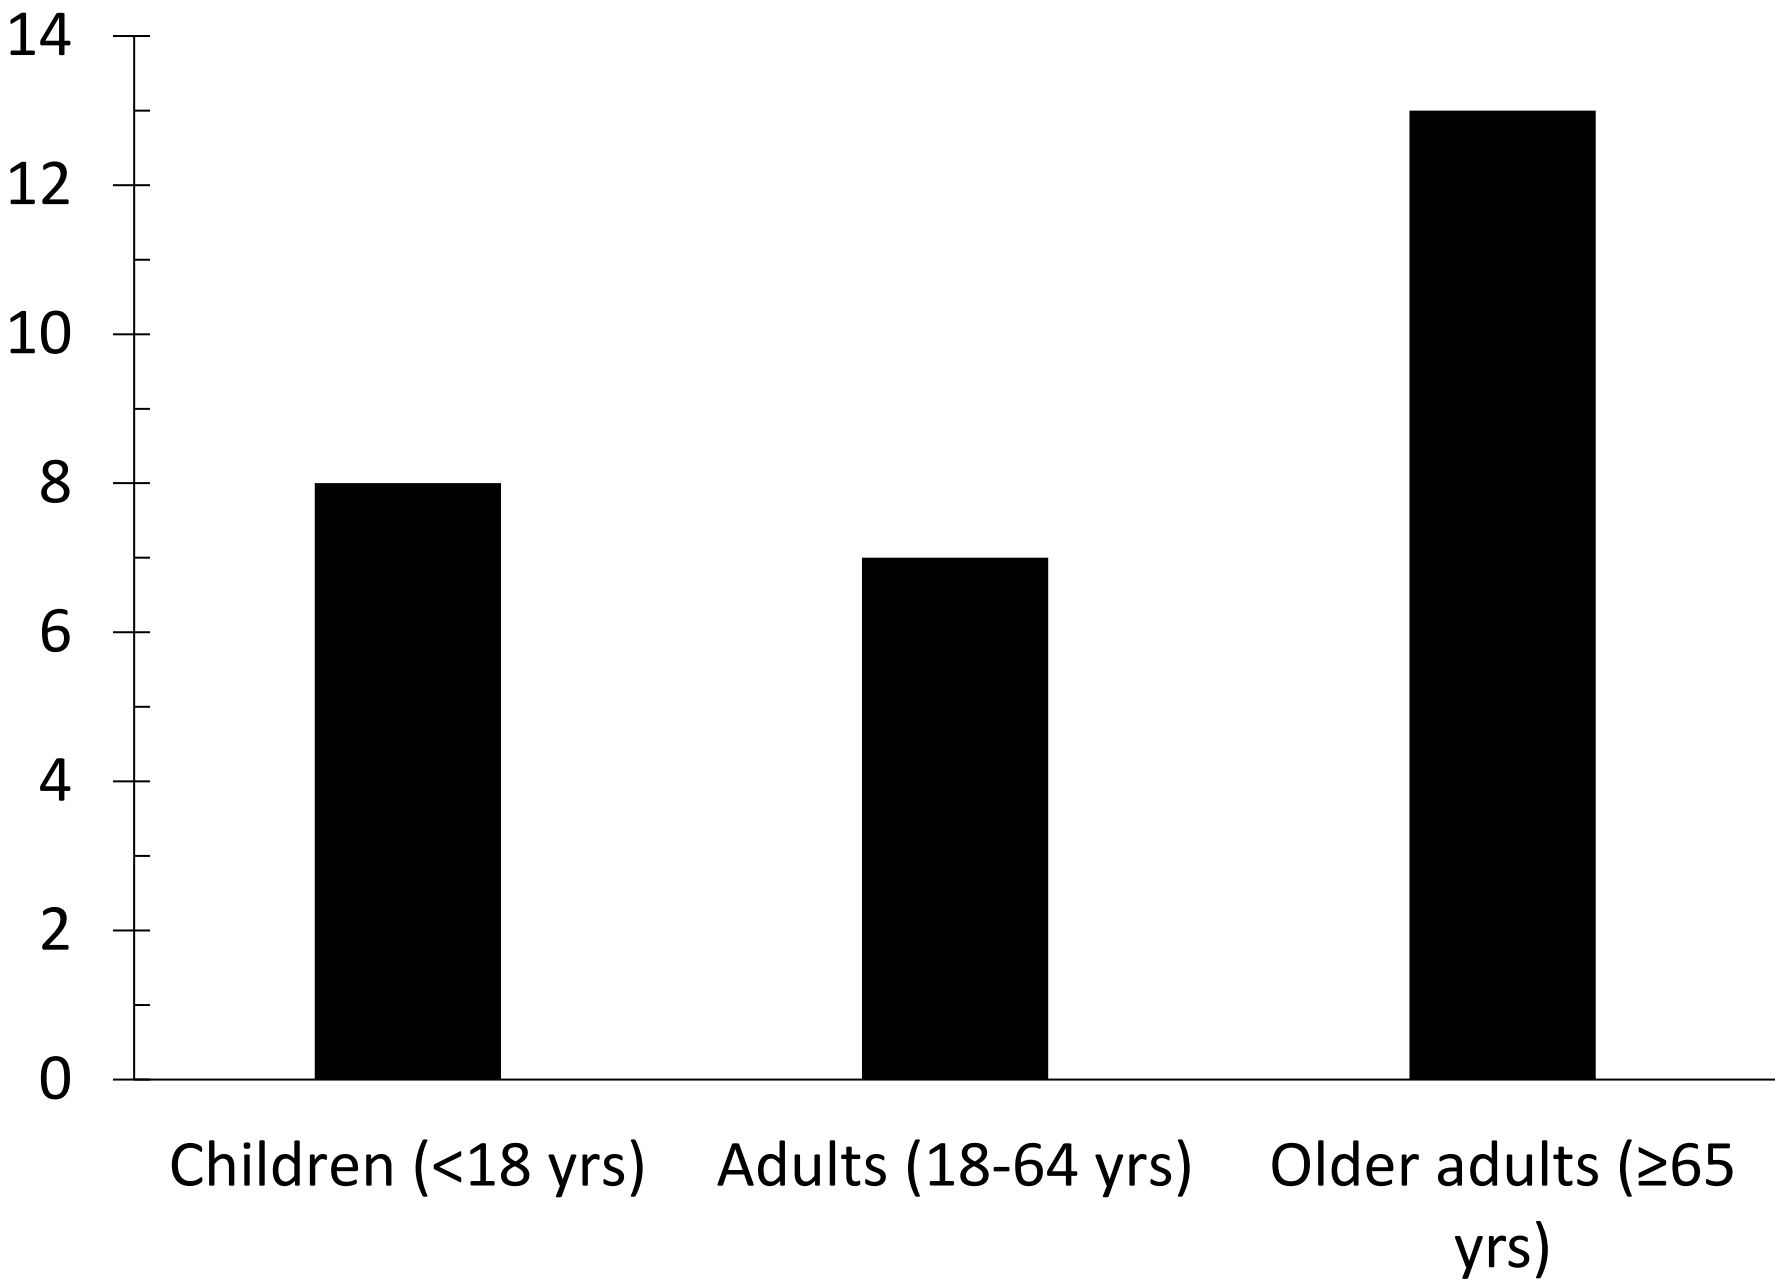

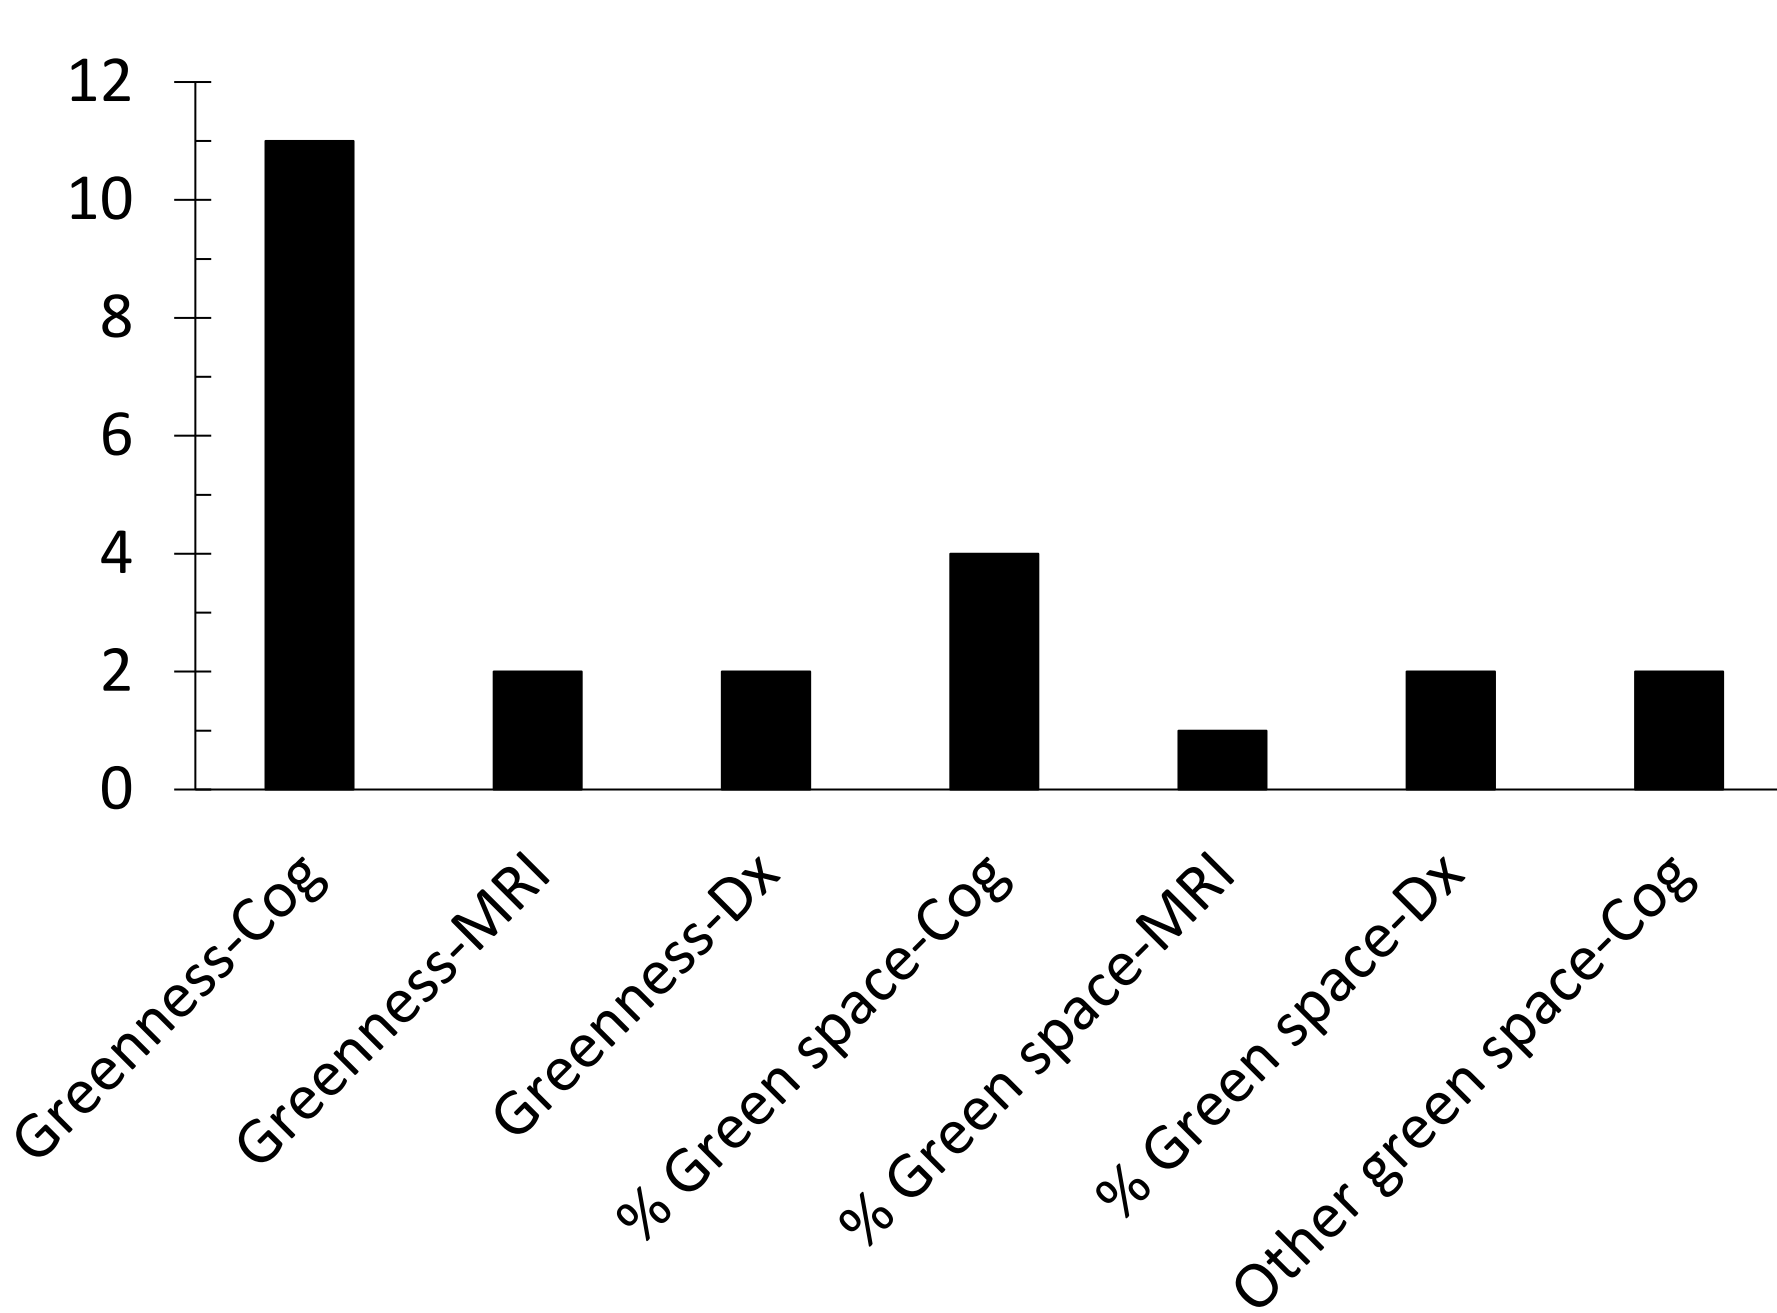

1  
2  
3  
4  
5  
6  
7  
8  
9  
10  
11  
12  
13  
14  
15  
16  
17  
18  
19  
20  
21  
22  
23  
24  
25  
26  
27  
28  
29  
30  
31  
32  
33  
34  
35  
36  
37  
38  
39  
40  
41  
42  
43  
44  
45  
46  
47



**Supplemental Figure 1.** Detailed diagram of literature search strategy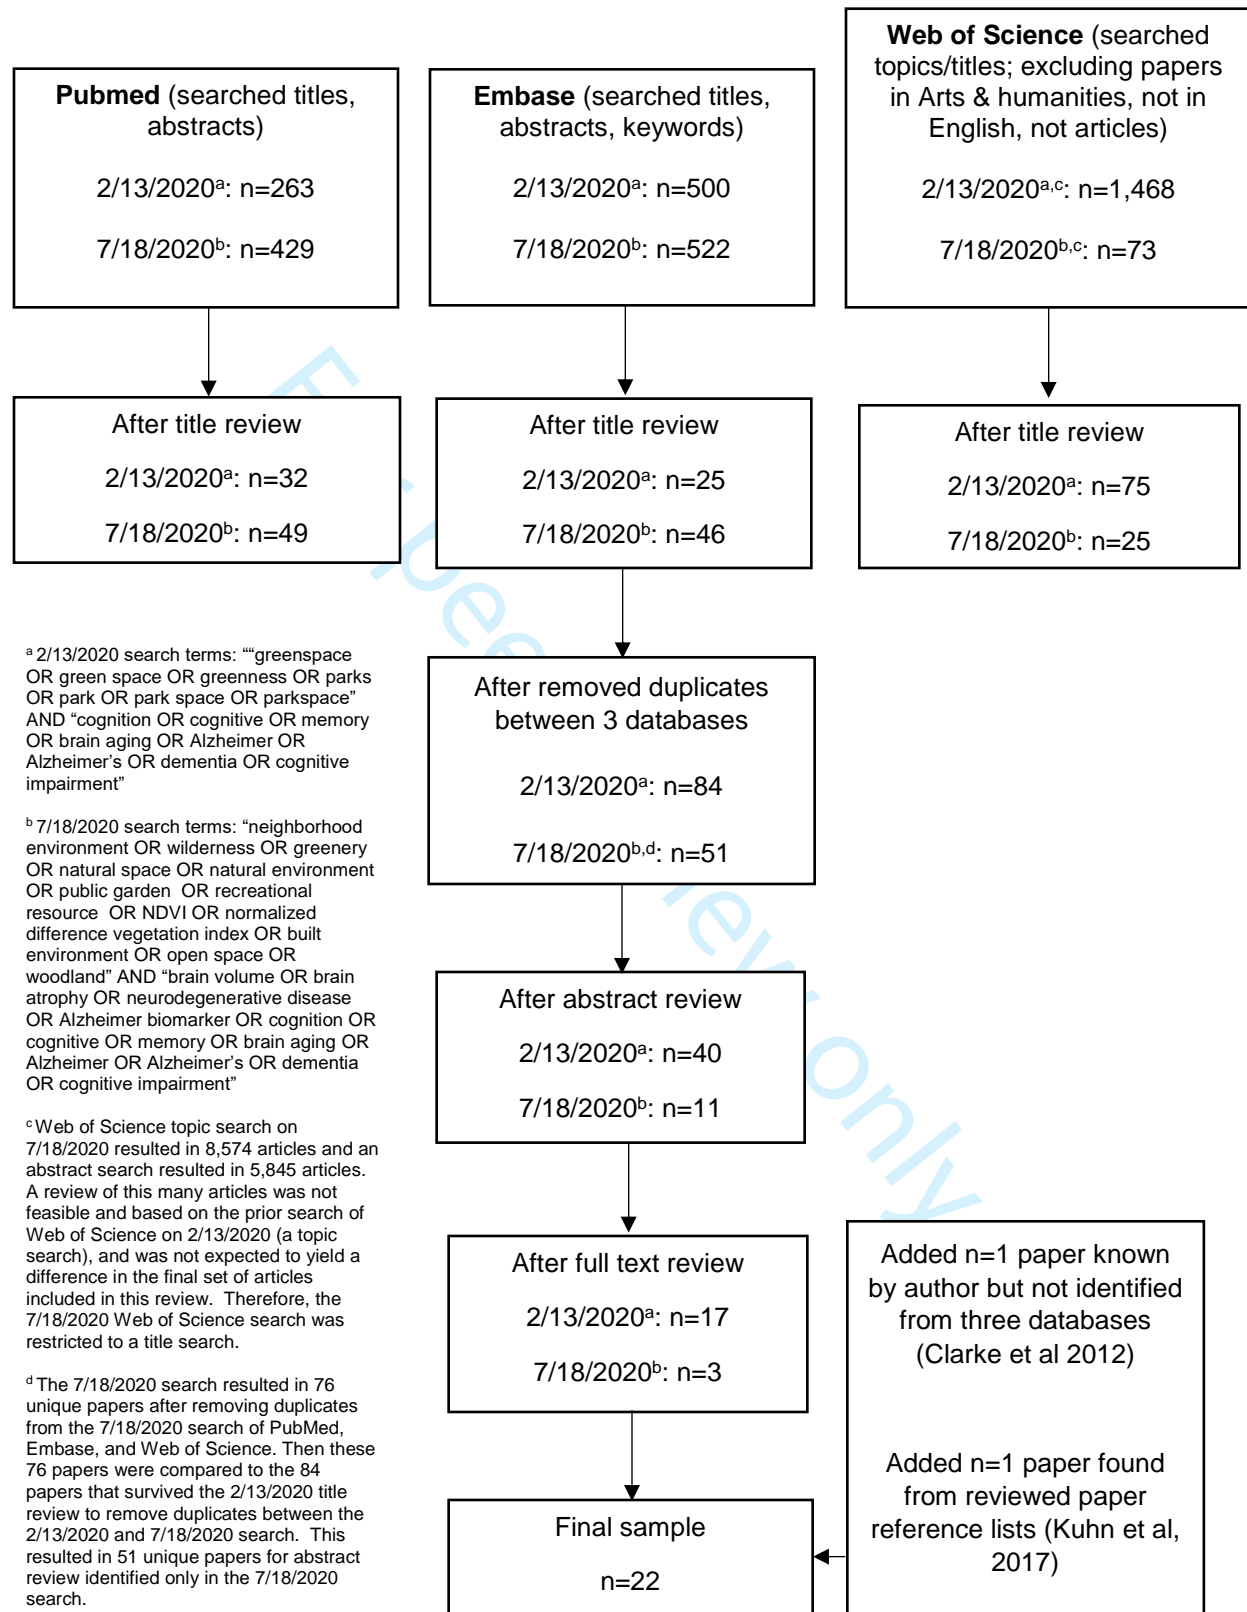

**Supplemental Text 1. List of 22 papers included in systematic review**

- Brown SC et al. (2018) Health Disparities in the Relationship of Neighborhood Greenness to Mental Health Outcomes in 249,405 U.S. Medicare Beneficiaries *Int J Environ Res Public Health* 15 doi:10.3390/ijerph15030430
- Cherrie MPC et al. (2018) Green space and cognitive ageing: A retrospective life course analysis in the Lothian Birth Cohort 1936 *Soc Sci Med* 196:56-65 doi:10.1016/j.socscimed.2017.10.038
- Cherrie MPC, Shortt NK, Ward Thompson C, Deary IJ, Pearce JR (2019) Association Between the Activity Space Exposure to Parks in Childhood and Adolescence and Cognitive Aging in Later Life *Int J Environ Res Public Health* 16 doi:10.3390/ijerph16040632
- Clarke PJ, Ailshire JA, House JS, Morenoff JD, King K, Melendez R, Langa KM (2012) Cognitive function in the community setting: the neighbourhood as a source of 'cognitive reserve'? *J Epidemiol Community Health* 66:730-736 doi:10.1136/jech.2010.128116
- Dadvand P et al. (2015) Green spaces and cognitive development in primary schoolchildren *Proc Natl Acad Sci U S A* 112:7937-7942 doi:10.1073/pnas.1503402112
- Dadvand P et al. (2018) The Association between Lifelong Greenspace Exposure and 3-Dimensional Brain Magnetic Resonance Imaging in Barcelona Schoolchildren *Environ Health Perspect* 126:027012 doi:10.1289/EHP1876
- Dadvand P et al. (2017) Lifelong Residential Exposure to Green Space and Attention: A Population-based Prospective Study *Environ Health Perspect* 125:097016 doi:10.1289/EHP694
- Dzhambov AM, Bahchevanov KM, Chompalov KA, Atanassova PA (2019) A feasibility study on the association between residential greenness and neurocognitive function in middle-aged Bulgarians *Arh Hig Rada Toksikol* 70:173-185 doi:10.2478/aiht-2019-70-3326
- de Keijzer C et al. (2018) Residential Surrounding Greenness and Cognitive Decline: A 10-Year Follow-up of the Whitehall II Cohort *Environ Health Perspect* 126:077003 doi:10.1289/EHP2875
- Flouri E, Papachristou E, Midouhas E (2019) The role of neighbourhood greenspace in children's spatial working memory *The British journal of educational psychology* 89:359-373 doi:10.1111/bjep.12243
- Hystad P PY, Noisel N, Boileau C (2019) Green space associations with mental health and cognitive function: Results from the Quebec CARTaGENE cohort *Environmental Epidemiology* 3:e040
- Kuhn S et al. (2017) In search of features that constitute an "enriched environment" in humans: Associations between geographical properties and brain structure *Scientific reports* 7 doi:ARTN 11920
- Liao J et al. (2019) Residential exposure to green space and early childhood neurodevelopment *Environment international* 128:70-76 doi:10.1016/j.envint.2019.03.070
- Reuben A et al. (2019) Residential neighborhood greenery and children's cognitive development *Social science & medicine* (1982) 230:271-279 doi:10.1016/j.socscimed.2019.04.029
- Wang D, Lau KK, Yu R, Wong SYS, Kwok TTY, Woo J (2017) Neighbouring green space and mortality in community-dwelling elderly Hong Kong Chinese: a cohort study *BMJ open* 7:e015794 doi:10.1136/bmjopen-2016-015794
- Ward JS, Duncan JS, Jarden A, Stewart T (2016) The impact of children's exposure to greenspace on physical activity, cognitive development, emotional wellbeing, and ability to appraise risk *Health Place* 40:44-50 doi:10.1016/j.healthplace.2016.04.015
- Wu YT, Prina AM, Jones A, Matthews FE, Brayne C, Collaboration MRCCF, Study A (2017) The Built Environment and Cognitive Disorders: Results From the Cognitive Function and Ageing Study II *Am J Prev Med* doi:10.1016/j.amepre.2016.11.020
- Wu YT et al. (2015) Community environment, cognitive impairment and dementia in later life: results from the Cognitive Function and Ageing Study *Age Ageing* 44:1005-1011 doi:10.1093/ageing/afv137
- Yu R, Wang D, Leung J, Lau K, Kwok T, Woo J (2018) Is Neighborhood Green Space Associated With Less Frailty? Evidence From the Mr. and Ms. Os (Hong Kong) Study *Journal of the American Medical Directors Association* 19:528-534 doi:10.1016/j.jamda.2017.12.015
- Yuchi W, Sbihi H, Davies H, Tamburic L, Brauer M (2020) Road proximity, air pollution, noise, green space and neurologic disease incidence: a population-based cohort study *Environmental health : a global access science source* 19:8 doi:10.1186/s12940-020-0565-4
- Zhu A, Yan L, Shu C, Zeng Y, Ji JS (2020) APOE epsilon4 Modifies Effect of Residential Greenness on Cognitive Function among Older Adults: A Longitudinal Analysis in China *Scientific reports* 10:82 doi:10.1038/s41598-019-57082-7
- Zijlema WL et al. (2017) The relationship between natural outdoor environments and cognitive functioning and its mediators *Environ Res* 155:268-275 doi:10.1016/j.envres.2017.02.017

Supplemental Table 1. Green space and brain health studies including children and adolescents (<18 year olds)

| Citation <sup>a</sup> , sample size, location   | Sample source                   | Age, sex, race/ethnicity                                                    | Green space measure                                                                                                                                                 | Brain health measure                                                                                                                                                                          | Statistical Method (covariates)                                                                                                                                                                   | Associations (positive, inverse, null)                                                                                                                                                                                                                                                                                                                                                                                     |
|-------------------------------------------------|---------------------------------|-----------------------------------------------------------------------------|---------------------------------------------------------------------------------------------------------------------------------------------------------------------|-----------------------------------------------------------------------------------------------------------------------------------------------------------------------------------------------|---------------------------------------------------------------------------------------------------------------------------------------------------------------------------------------------------|----------------------------------------------------------------------------------------------------------------------------------------------------------------------------------------------------------------------------------------------------------------------------------------------------------------------------------------------------------------------------------------------------------------------------|
| Cherrie (2018) n=281<br><br>Edinburgh, Scotland | Lothian Birth Cohort (P)        | 11-78 years<br><br>48% female<br><br>Race/ethnicity not specified           | Park space (L): % park space (Location: residential; Boundary: 500m, 1000m, 1500m buffer) Time period: childhood, adulthood, older adulthood                        | Cognition (L): Moray House Test No 12 (domain: intelligence) Time period: childhood, adulthood, older adulthood                                                                               | Multivariable linear regression (sex, father's occupation, number per room in childhood household, childhood smoking status, adulthood occupation, alcohol consumption, adulthood smoking status) | Positive: Greater neighborhood % park space in childhood and adulthood associated with less cognitive change from 70 to 76 years.<br>Null: Greater neighborhood % park space in childhood, adulthood, and older adulthood not associated with cognitive change from age 11 to 70. No association between % park space in late-life and cognitive change from 70 to 76 years.                                               |
| Dadvand (2015) n=2,593<br><br>Barcelona, Spain  | 36 primary schools in Barcelona | 7-10 years (mean=8.5)<br><br>50% female<br><br>16% not Spanish, 84% Spanish | Greenness (CS): NDVI (Location: residential, school, school commute; Boundary: residential-250m buffer, school and commute route-50m buffer) Time period: childhood | Cognition (L): Computerized n-back test (domain: working memory); Computerized attentional network test (domain: attention, alerting, orienting, executive processing) Time period: childhood | Multivariable linear mixed effects regression (age, sex, maternal education, residential neighborhood SES)                                                                                        | Positive: Greater school greenness and total greenness (school, home, commute) associated with 12-month enhancement in working memory and attention. Greater commute route greenness associated with 12-month enhancement in working memory.<br>Null: No association between residential greenness and cognition, commute greenness and attention, or any greenness measure and alerting, orienting, executive processing. |

|    |                 |               |                |                   |                          |                              |                               |
|----|-----------------|---------------|----------------|-------------------|--------------------------|------------------------------|-------------------------------|
| 1  |                 |               |                |                   |                          |                              |                               |
| 2  |                 |               |                |                   |                          |                              |                               |
| 3  | Dadvand         | Infancia y    | 4-7 years      | Greenness (L):    | Cognition (L): Conners'  | Multivariable linear mixed   | Positive: Greater             |
| 4  | (2017)          | Medio         |                | NDVI and          | Kiddie Continuous        | effects regression (age,     | neighborhood greenness        |
| 5  | n=888 at 4-5    | Ambiente      | 49% female     | Vegetation        | Performance Test (4-5    | sex, preterm birth, maternal | (birth to 4-5 years old)      |
| 6  | year follow-up; | (INMA) cohort |                | Continuous Fields | year olds) (domain:      | cognitive performance,       | associated with attention     |
| 7  | n=987 at 7-     | (P)           | Race/ethnicity | (% woody          | attention);              | maternal smoking during      | at 4-5 years and greater      |
| 8  | year follow-up  |               | not specified  | vegetation >5 m   | Attentional Network Task | pregnancy, exposure to       | greenness (birth to 7         |
| 9  |                 |               |                | high)             | (7 year olds) (domain:   | environmental tobacco        | years old) associated with    |
| 10 | Sabadell and    |               |                | (Location:        | attention)               | smoke, maternal education,   | attention at 7 years old.     |
| 11 | Valencia,       |               |                | residential;      | Time period: childhood   | neighborhood SES)            | Null: % neighborhood          |
| 12 | Spain           |               |                | Boundary: 100m,   |                          |                              | woody vegetation >5m not      |
| 13 |                 |               |                | 300m, 500m        |                          |                              | associated with attention.    |
| 14 |                 |               |                | buffer)           |                          |                              |                               |
| 15 |                 |               |                | Time period:      |                          |                              |                               |
| 16 |                 |               |                | childhood         |                          |                              |                               |
| 16 | Dadvand         | Brain         | Mean: 8.4      | Greenness (L):    | Magnetic Resonance       | Adjusted voxel-wise          | Positive: Greater             |
| 17 | (2018)          | Development   | years          | NDVI              | Imaging (CS) of gray and | regression using statistical | neighborhood greenness        |
| 18 | n=253           | and Air       |                | (Location:        | white matter in regional | parametric maps (maternal    | exposure since birth          |
| 19 |                 | Pollution     | 49% female     | residential;      | clusters                 | education, neighborhood      | associated with left and      |
| 20 | Barcelona,      | Ultrafine     |                | Boundary: 100m,   | Time period: childhood   | SES- included one or the     | right prefrontal cortex, left |
| 21 | Spain           | Particles in  | Race/ethnicity | 500m buffer)      |                          | other in the analysis)       | premotor cortex, and          |
| 22 |                 | School        | not specified  | Time period:      |                          |                              | white matter.                 |
| 23 |                 | Children      |                | childhood         |                          |                              | Null: No associations         |
| 24 |                 | (BREATHE)     |                |                   |                          |                              | between greenness and         |
| 25 |                 |               |                |                   |                          |                              | other brain regions.          |
| 25 | Flouri (2019)   | UK Millenium  | Mean: 10.6     | Green space (CS): | Cognition (CS):          | Multivariable, multilevel    | Positive: Greater %           |
| 26 | n=4,758         | Cohort Study  | years          | % green space     | Cambridge                | linear regression (age in    | neighborhood green            |
| 27 |                 | (MCS) (P)     |                | (Location:        | Neuropsychological Test  | months, gender, family       | space associated with         |
| 28 | UK              |               | 49% female     | residential;      | Automated Battery SWM    | socioeconomic status,        | better spatial working        |
| 29 |                 |               |                | Boundary: ward)   | Test (domain: spatial    | ethnicity, sports            | memory.                       |
| 30 |                 |               | 74% white      | Time period:      | working memory)          | participation, computer      |                               |
| 31 |                 |               | 26% non-white  | childhood         | Time period: childhood   | gaming, residential mobility |                               |
| 32 |                 |               |                |                   |                          | since infancy, neighborhood  |                               |
| 33 |                 |               |                |                   |                          | deprivation)                 |                               |
| 34 |                 |               |                |                   |                          |                              |                               |
| 35 |                 |               |                |                   |                          |                              |                               |
| 36 |                 |               |                |                   |                          |                              |                               |
| 37 |                 |               |                |                   |                          |                              |                               |
| 38 |                 |               |                |                   |                          |                              |                               |
| 39 |                 |               |                |                   |                          |                              |                               |
| 40 |                 |               |                |                   |                          |                              |                               |
| 41 |                 |               |                |                   |                          |                              |                               |
| 42 |                 |               |                |                   |                          |                              |                               |
| 43 |                 |               |                |                   |                          |                              |                               |
| 44 |                 |               |                |                   |                          |                              |                               |
| 45 |                 |               |                |                   |                          |                              |                               |
| 46 |                 |               |                |                   |                          |                              |                               |
| 47 |                 |               |                |                   |                          |                              |                               |

1  
2  
3  
4  
5  
6  
7  
8  
9  
10  
11  
12  
13  
14  
15  
16  
17  
18  
19  
20  
21  
22  
23  
24  
25  
26  
27  
28  
29  
30  
31  
32  
33  
34  
35  
36  
37  
38  
39  
40  
41  
42  
43  
44  
45  
46  
47

|                          |                                                                          |                                                                               |                                                                                             |                                                                                                                                                                                                                                                                                                                                                                                       |                                                                                                                                                                                                                                                                                                                                           |                                                                                                                                                          |
|--------------------------|--------------------------------------------------------------------------|-------------------------------------------------------------------------------|---------------------------------------------------------------------------------------------|---------------------------------------------------------------------------------------------------------------------------------------------------------------------------------------------------------------------------------------------------------------------------------------------------------------------------------------------------------------------------------------|-------------------------------------------------------------------------------------------------------------------------------------------------------------------------------------------------------------------------------------------------------------------------------------------------------------------------------------------|----------------------------------------------------------------------------------------------------------------------------------------------------------|
| Liao (2019)<br>n=1,312   | Women and Children Medical and Healthcare Center of Wuhan                | Mean: 39 weeks<br><br>46% female<br><br>Race/ethnicity not specified          | Greenness (CS): NDVI (Location: residential; Boundary: 300m buffer) Time period: childhood  | Cognition (CS): Bayley Scales of Infant Development – Mental Development Index (Domain: perceptual acuities, memory, learning and problem solving, abstract thinking) Time period: childhood                                                                                                                                                                                          | Multivariable, multiple linear regression (household income, maternal age, maternal education, maternal pre-pregnancy BMI, maternal passive smoking during pregnancy, gestational age, birth weight, residence areas)                                                                                                                     | Positive: Greater neighborhood greenness at birth associated with better Mental Development Index scores.                                                |
| Reuben (2019)<br>n=1,658 | Environmental Risk (E-Risk) Longitudinal Study (same sex twin study) (P) | Age 5, 12, and 18<br><br>52% female<br><br>Race/ethnicity not specified       | Greenness (L): NDVI (Location: residential; Boundary: 1-mile buffer) Time period: childhood | Cognition (L): Wechsler Preschool and Primary Scale of Intelligence-Revised, Wechsler Intelligence Scale for Children-IV, Wechsler Adult Intelligence Scale-IV (domain: crystallized and fluid cognitive ability); Spatial Span test (domain: executive function); Spatial Working Memory test (domain: working memory); Rapid Visual Information Processing test (domain: attention) | Multivariable analysis of covariance model for longitudinal model (sex, polygenic score for educational attainment, family socioeconomic status, neighborhood socioeconomic status)<br><br>Multivariable information maximum likelihood (FIML) estimated regression, accounting for missing data (same covariates as longitudinal models) | Null: Neighborhood greenness not associated with fluid ability, crystallized ability, executive function, attention, or working memory measured any age. |
| Ward (2016)<br>n=72      | Three intermediate schools                                               | 11-14 years (mean=12.7)<br><br>59% female<br><br>Race/ethnicity not specified | Time spent in green space from GPS (CS) Time period: childhood                              | Cognition (CS): CNS Vital Signs (domain: visual memory, verbal memory, processing speed, psychomotor speed, reaction time, cognitive flexibility, executive function) Time period: childhood                                                                                                                                                                                          | Multivariable generalized linear mixed regression (sex, age, school)                                                                                                                                                                                                                                                                      | Null: % time spent in greenspace not associated with any cognitive domain.                                                                               |

Abbreviations: CS = cross-sectional; L= longitudinal; UK = United Kingdom; P = population-based/random sampling  
<sup>a</sup> Full list of papers found in Supplemental Text 1

Supplemental Table 2. Green space and brain health studies including adults aged 18-64 years

| Citation <sup>a</sup> , sample size, location | Sample source                            | Age, sex, race/ethnicity                                                               | Green space measure                                                                                                                                   | Brain health measure                                                                                                                                                                                                                                                               | Statistical Method (covariates)                                                                                                                                                                           | Associations (positive, inverse, null)                                                                                                                                                      |
|-----------------------------------------------|------------------------------------------|----------------------------------------------------------------------------------------|-------------------------------------------------------------------------------------------------------------------------------------------------------|------------------------------------------------------------------------------------------------------------------------------------------------------------------------------------------------------------------------------------------------------------------------------------|-----------------------------------------------------------------------------------------------------------------------------------------------------------------------------------------------------------|---------------------------------------------------------------------------------------------------------------------------------------------------------------------------------------------|
| Cherrie (2018)                                | See Table 1                              |                                                                                        |                                                                                                                                                       |                                                                                                                                                                                                                                                                                    |                                                                                                                                                                                                           |                                                                                                                                                                                             |
| Clarke (2012)<br>n = 949<br>Chicago, US       | Chicago Community Adult Health Study (P) | ≥50 years<br>56% female<br>37% black, 18% Hispanic, 43% white, 3% other race/ethnicity | Park space (CS):<br>Park area in square miles (Location: residential; Boundary: US Census tract)<br>Time period: adulthood, older adulthood           | Cognition (CS):<br>Modified Telephone Instrument for Cognitive Status (domain: global cognition)<br>Time period: adulthood, older adulthood                                                                                                                                        | Multivariable, multilevel linear regression (age, gender, marital status, race/ethnicity, employment status, socioeconomic position, index of comorbid conditions, physical activity, social interaction) | Null: neighborhood park area not associated with global cognition.                                                                                                                          |
| De Keijzer (2018)<br>n=6,506<br>UK            | The Whitehall II study (P)               | 45-68 years<br>29% female<br>91% white<br>9% non-white                                 | Greenness (L): NDVI and EVI (Location: residential; Boundary: 500m, 1000m buffer around postcode centroid)<br>Time period: adulthood, older adulthood | Cognition (L): Alice Heim 4 test of intelligence (domain: reasoning); S words, Animal names (domain: phonemic and semantic verbal fluency); Free recall test (domain: short-term memory); Global cognition z-score derived from 4 tests<br>Time period: adulthood, older adulthood | Multivariable linear mixed effects regression (gender, ethnicity, education, time varying: age, marital status, employment grade, neighborhood SSES, diet, alcohol consumption, smoking status)           | Positive: Greater neighborhood greenness associated with slower decline in global cognition, reasoning, and fluency.<br>Null: Neighborhood greenness not associated with short-term memory. |

1  
2  
3  
4  
5  
6  
7  
8  
9  
10  
11  
12  
13  
14  
15  
16  
17  
18  
19  
20  
21  
22  
23  
24  
25  
26  
27  
28  
29  
30  
31  
32  
33  
34  
35  
36  
37  
38  
39  
40  
41  
42  
43  
44  
45  
46  
47

|                                               |                                  |                                                                      |                                                                                                                                            |                                                                                                                                                                                                                                                                                                                                                                                                                                                                                                         |                                                                                                                                                                                                                                              |                                                                                                                                                                                                                                                                                                                                                                                                                                                                                                                         |
|-----------------------------------------------|----------------------------------|----------------------------------------------------------------------|--------------------------------------------------------------------------------------------------------------------------------------------|---------------------------------------------------------------------------------------------------------------------------------------------------------------------------------------------------------------------------------------------------------------------------------------------------------------------------------------------------------------------------------------------------------------------------------------------------------------------------------------------------------|----------------------------------------------------------------------------------------------------------------------------------------------------------------------------------------------------------------------------------------------|-------------------------------------------------------------------------------------------------------------------------------------------------------------------------------------------------------------------------------------------------------------------------------------------------------------------------------------------------------------------------------------------------------------------------------------------------------------------------------------------------------------------------|
| Dzhambov (2019)<br>n=112<br>Plovdiv, Bulgaria | Convenience sample of volunteers | 45-55 years (mean: 50)<br>59% female<br>Race/ethnicity not specified | Greenness (CS):<br>NDVI<br>(Location: residential;<br>Boundary: 100m, 100m, 750m, 1000m buffer around residence)<br>Time period: adulthood | Cognition (CS):<br>Consortium to Establish a Registry for Alzheimer's Disease Neuropsychological Battery (CERAD-NB), including Verbal Fluency test (domain: fluency), modified Boston Naming Test (domain: naming), Word List Memory (domain: memory), Word List Recall (domain: memory), Word List Recognition; Montreal Cognitive Assessment (MoCA) (domain: global cognition); Magnetic Resonance Imaging (CS) of cortical thickness of multiple brain regions of interest<br>Time period: adulthood | Multivariable linear regression (age, sex, education, city, neighborhood population, smoking, alcohol consumption, waist circumference, blood pressure, cholesterol, blood glucose, nitrogen dioxide [NO <sub>2</sub> ], road traffic noise) | Positive: Greater greenness associated with better global cognition and verbal fluency. Greater greenness associated with greater cortical thickness in both hemispheres in the prefrontal cortex, bilateral fusiform gyrus, left precuneus and insula, and right cuneus.<br>Null: Greater greenness was not associated with scores on the subtests of the CERAD-NB except the Verbal Fluency Test. Greater greenness was not associated with cortical thickness in regions of the brain other than those listed above. |
| Hystad (2019)<br>n=6,658<br>Quebec, Canada    | CARTaGENE Cohort (P)             | 40-69 years (mean: 55)<br>55% female<br>81% white<br>19% non-white   | Greenness (L): NDVI<br>(Location: residential;<br>Boundary: 100m, 300m, 500m, 1000m buffer around postal codes)<br>Time period: adulthood  | Cognition (CS):<br>Reaction time test (domain: reaction time); Paired associates learning (domain: working memory); verbal and numeric reasoning (domain: executive function)<br>Time period: adulthood                                                                                                                                                                                                                                                                                                 | Multivariable linear regression (age, sex, household income, race, marital status, city, population density)                                                                                                                                 | Inverse: Five-year change in greenness associated with worse reasoning.<br>Null: Five-year average neighborhood greenness not associated with reaction time, reasoning, or working memory. Five-year change in greenness not associated with reaction time or working memory.                                                                                                                                                                                                                                           |

For peer review only

|    |                 |                  |                   |                         |                        |                           |                         |
|----|-----------------|------------------|-------------------|-------------------------|------------------------|---------------------------|-------------------------|
| 1  |                 |                  |                   |                         |                        |                           |                         |
| 2  |                 |                  |                   |                         |                        |                           |                         |
| 3  | Yuchi           | Medical Services | 45-84 years       | Greenness (L): NDVI     | Diagnosis (L):         | Multivariable Cox         | Positive: Greater       |
| 4  | (2020)          | Plan Physician   | Sex not provided  | (Location: residential; | Alzheimer's disease,   | proportion hazards model  | neighborhood            |
| 5  | n=678,000       | Visit and        | for entire sample | Boundary: 100m          | non-Alzheimer's        | for non-Alzheimer's       | greenness associated    |
| 6  | Vancouver,      | Hospital         | Race/ethnicity    | buffer)                 | disease; and           | disease and Parkinson's   | with lower hazard ratio |
| 7  | British         | Discharge data   | not specified     | Time period:            | Parkinson's disease    | disease (age, sex,        | for non-Alzheimer's     |
| 8  | Columbia,       | (P)              |                   | adulthood, older        | (source: hospital      | comorbidities,            | disease and             |
| 9  | Canada          |                  |                   | adulthood               | records, physician     | neighborhood household    | Parkinson's disease.    |
| 10 |                 |                  |                   |                         | visits, prescription   | income, neighborhood      | Inverse: Greater        |
| 11 |                 |                  |                   |                         | history)               | education, neighborhood   | neighborhood            |
| 12 |                 |                  |                   |                         | Time period:           | ethnicity);               | greenness associated    |
| 13 |                 |                  |                   |                         | adulthood, older       | Multivariable conditional | with increased odds of  |
| 14 |                 |                  |                   |                         | adulthood              | logistic regression for   | Alzheimer's disease.    |
| 15 |                 |                  |                   |                         |                        | Alzheimer's disease       |                         |
| 16 |                 |                  |                   |                         |                        | (comorbidities,           |                         |
| 17 |                 |                  |                   |                         |                        | neighborhood household    |                         |
| 18 |                 |                  |                   |                         |                        | income, neighborhood      |                         |
| 19 |                 |                  |                   |                         |                        | education, neighborhood   |                         |
| 20 | Zijlema (2017)  | Positive Health  | Mean: 48 years    | Greenness (CS):         | Cognition (CS): Color  | Multivariable, multilevel | Positive: Greater       |
| 21 | n=1,628         | Effects of the   | 54% female        | NDVI                    | Trails Test completion | linear and logistic       | residential distance to |
| 22 | Barcelona,      | Natural Outdoor  | Race/ethnicity    | (Location: residential; | time and errors        | regression (age, sex,     | natural outdoor         |
| 23 | Spain           | Environment in   | not specified     | Boundary: 100m,         | (domain: visual        | education, neighborhood   | environments            |
| 24 | Doetinchem,     | Typical          |                   | 300m, 500m buffer);     | attention/effortful    | socioeconomic status,     | associated with         |
| 25 | Netherlands     | Populations in   |                   | Other green space       | executive processing)  | time spent away from      | greater cognitive test  |
| 26 | Stoke-on-Trent, | Different        |                   | measures (CS):          | Time period:           | home, Color Trails Test   | completion time.        |
| 27 | UK              | Regions in       |                   | Residential distance    | adulthood, older       | quality)                  | Null: Residential       |
| 28 |                 | Europe           |                   | to natural outdoor      | adulthood              |                           | greenness,              |
| 29 |                 | (PHENOTYPE)      |                   | environment, self-      |                        |                           | percentage residential  |
| 30 |                 | (P)              |                   | reported amount of      |                        |                           | natural environment,    |
| 31 |                 |                  |                   | natural outdoor         |                        |                           | self-reported natural   |
| 32 |                 |                  |                   | environment; self-      |                        |                           | environment visits,     |
| 33 |                 |                  |                   | reported visits to      |                        |                           | and self-reported time  |
| 34 |                 |                  |                   | natural outdoor         |                        |                           | spent visiting natural  |
| 35 |                 |                  |                   | environment; self-      |                        |                           | environment not         |
| 36 |                 |                  |                   | reported time visiting  |                        |                           | associated with         |
| 37 |                 |                  |                   | natural outdoor         |                        |                           | cognition.              |
| 38 |                 |                  |                   | environment             |                        |                           |                         |
| 39 |                 |                  |                   | Time period:            |                        |                           |                         |
| 40 |                 |                  |                   | adulthood, later-       |                        |                           |                         |
| 41 |                 |                  |                   | adulthood               |                        |                           |                         |

Abbreviations: CS = cross-sectional; L = Longitudinal; P = population-based/random sampling; EVI = Enhanced Vegetation Index; UK = United Kingdom

<sup>a</sup> Full list of papers found in Supplemental Text 1



Supplemental Table 3. Green space and brain health studies including older adults aged ≥65 years

| Citation <sup>a</sup> , sample size, location | Sample source                                                 | Age, sex, race/ethnicity                                                 | Green space measure                                                                                                                                            | Brain health measure                                                                                                                                                                                                                                           | Statistical Method (covariates)                                                               | Associations (positive, inverse, null)                                                                                                                                                                                                           |
|-----------------------------------------------|---------------------------------------------------------------|--------------------------------------------------------------------------|----------------------------------------------------------------------------------------------------------------------------------------------------------------|----------------------------------------------------------------------------------------------------------------------------------------------------------------------------------------------------------------------------------------------------------------|-----------------------------------------------------------------------------------------------|--------------------------------------------------------------------------------------------------------------------------------------------------------------------------------------------------------------------------------------------------|
| Brown (2018)<br>n=249,405<br>Florida, US      | US Medicare Beneficiaries from Miami-Dade County, Florida (P) | Age: 65-111 years (mean: 76)<br>58% female<br>77% non-white<br>23% white | Greenness (CS): NDVI (Location: residential; Boundary: US Census block)<br>Time period: older adulthood                                                        | Diagnosis (CS): Alzheimer's disease (source: US Centers for Medicare and Medicaid Services)<br>Time period: older adulthood                                                                                                                                    | Multivariable, multilevel logistic regression (age, sex, race/ethnicity, neighborhood income) | Positive: Greater neighborhood greenness associated with lower odds of Alzheimer's disease.                                                                                                                                                      |
| Cherrie (2018)                                | See Table 1                                                   |                                                                          |                                                                                                                                                                |                                                                                                                                                                                                                                                                |                                                                                               |                                                                                                                                                                                                                                                  |
| Cherrie (2019)<br>n=281<br>Edinburgh, UK      | Lothian Birth Cohort (P)                                      | Age: 70-76 years<br>Female: 48%<br>Race/ethnicity not specified          | Park space (L): % park space (Location: residential, school, school route; Boundary: 1000m buffer around home, school, school route)<br>Time period: childhood | Cognition (L): Moray House Test No 12 (domain: intelligence)<br>Time period: older adulthood (sex, father's occupation, number per room in childhood household, childhood smoking status, adulthood occupation, alcohol consumption, adulthood smoking status) | Multivariable, multilevel linear regression                                                   | Positive: % park space at ages 11-18 near home, school, and school route associated with less cognitive change from 70 to 76 years.<br>Null: No association between % park space measures at ages 4-11 and cognitive change from 70 to 76 years. |
| Clarke (2012)                                 | See Table 2                                                   |                                                                          |                                                                                                                                                                |                                                                                                                                                                                                                                                                |                                                                                               |                                                                                                                                                                                                                                                  |
| De Keijzer (2018)                             | See Table 2                                                   |                                                                          |                                                                                                                                                                |                                                                                                                                                                                                                                                                |                                                                                               |                                                                                                                                                                                                                                                  |
| Kuhn (2017)<br>n=341<br>Berlin, Germany       | Berlin Aging Study II                                         | 61-82 years (mean: 70)<br>38% female<br>Race/ethnicity not specified     | Green space (CS): Amount of forest and urban green (Location: residential; Boundary: 1km surrounding residence)<br>Time period: older adulthood                | Magnetic Resonance Imaging (CS) of integrity of amygdala, pregenual anterior cingulate cortex (pACC), and dorsolateral prefrontal cortex (DLPFC) determined from                                                                                               | Structural Equation Modeling (SEM) (age, sex, years of education)                             | Positive: Greater amount of forest in neighborhood associated with greater amygdala integrity.<br>Null: No association between amount of forest and pACC or DLPFC integrity, or between amount                                                   |

1  
2  
3  
4  
5  
6  
7  
8  
9  
10  
11  
12  
13  
14  
15  
16  
17  
18  
19  
20  
21  
22  
23  
24  
25  
26  
27  
28  
29  
30  
31  
32  
33  
34  
35  
36  
37  
38  
39  
40  
41  
42  
43  
44  
45  
46  
47

indicators of brain structural integrity (grey matter volume, magnetization transfer ratio, mean diffusivity)  
Time period: Older adulthood

of urban green and any brain measure.

|                                            |                                                                     |                                                                          |                                                                                                                                                                 |                                                                                                                                                                                                                                                    |                                                                                                                                  |                                                                                                                                                                                                                                           |
|--------------------------------------------|---------------------------------------------------------------------|--------------------------------------------------------------------------|-----------------------------------------------------------------------------------------------------------------------------------------------------------------|----------------------------------------------------------------------------------------------------------------------------------------------------------------------------------------------------------------------------------------------------|----------------------------------------------------------------------------------------------------------------------------------|-------------------------------------------------------------------------------------------------------------------------------------------------------------------------------------------------------------------------------------------|
| Wang (2017)<br>n=3,544<br>Hong Kong, China | Community based-cohort                                              | ≥65 years (median: 72)<br>50% female<br>Race/ethnicity not specified     | Greenness (CS): NDVI (Location: residential; boundary: 300m buffer)<br>Time period: older adulthood                                                             | Cognition (CS): Mini Mental State Exam (domain: global cognition)<br>Time period: older adulthood                                                                                                                                                  | Spearman's correlation coefficients (unadjusted analysis)                                                                        | Null: no correlation between neighborhood greenness and global cognition.                                                                                                                                                                 |
| Wu (2015)<br>n=2,424<br>UK                 | Medical Research Council Cognitive Function and Ageing Study (P)    | Age ≥74 years (Mean: 82)<br>60.7% female<br>Race/ethnicity not specified | Green space (CS): % green space/private gardens (Location: residential; Boundary: Lower – Layer Super Output Area for postcode)<br>Time period: older adulthood | Cognitive status (CS): Cognitive impairment (source: Mini Mental State Exam ≤25)<br>Diagnosis (CS): dementia (source: Geriatric Mental Status and Automatic Geriatric Examination for Computer Assisting Taxonomy)<br>Time period: older adulthood | Multivariable, multilevel logistic regression (age, gender, education, social class, number chronic illnesses, area deprivation) | Inverse: Individuals living with highest quartile of neighborhood green space (versus lowest) had increased odds of cognitive impairment and dementia.                                                                                    |
| Wu (2017)<br>n=7,505<br>UK                 | Medical Research Council Cognitive Function and Ageing Study II (P) | Median: 74 years<br>54% female<br>Race/ethnicity not specified           | Green space (CS): % green space/private gardens (Location: residential; Boundary: Lower – Layer Super Output Area for postcode)<br>Time period: older adulthood | Cognitive status (CS): Cognitive impairment (source: Mini Mental State Exam ≤25)<br>Diagnosis (CS): dementia (source: Geriatric Mental Status and Automatic Geriatric Examination for Computer Assisting Taxonomy)<br>Time period: older adulthood | Multivariable, multilevel logistic regression (age, gender, education, number chronic illnesses, area deprivation)               | Inverse: Individuals living with highest quintile of neighborhood green space/private gardens (versus lowest) had increased odds of cognitive impairment.<br>Null: No associations between neighborhood green space and odds of dementia. |

1  
2  
3  
4  
5  
6  
7  
8  
9  
10  
11  
12  
13  
14  
15  
16  
17  
18  
19  
20  
21  
22  
23  
24  
25  
26  
27  
28  
29  
30  
31  
32  
33  
34  
35  
36  
37  
38  
39  
40  
41  
42  
43  
44  
45  
46  
47

|                                             |                                                                          |                                                                 |                                                                                                                                  |                                                                                                                             |                                                                                                                                                                                                                                                                                                      |                                                                                                                                |
|---------------------------------------------|--------------------------------------------------------------------------|-----------------------------------------------------------------|----------------------------------------------------------------------------------------------------------------------------------|-----------------------------------------------------------------------------------------------------------------------------|------------------------------------------------------------------------------------------------------------------------------------------------------------------------------------------------------------------------------------------------------------------------------------------------------|--------------------------------------------------------------------------------------------------------------------------------|
| Yu (2018)<br>n=3,240<br>Hong Kong,<br>China | Mr. and Ms. Os<br>(Hong Kong)<br>study                                   | Mean: 72 years<br>49% female<br>Race/ethnicity<br>not specified | Greenness (CS): NDVI<br>(Location: residential;<br>Boundary: 300m buffer)<br>Time period: older<br>adulthood                     | Cognition (CS): Mini<br>Mental State Exam<br>(domain: global<br>cognition)<br>Time period: older<br>adulthood               | Multivariable<br>regression path<br>analysis (age, sex,<br>marital status,<br>socioeconomic<br>status, alcohol intake,<br>diet quality, baseline<br>frailty status)                                                                                                                                  | Null: Greater neighborhood<br>greenness not directly<br>associated with cognition.                                             |
| Yuchi (2020)                                | See Table 2                                                              |                                                                 |                                                                                                                                  |                                                                                                                             |                                                                                                                                                                                                                                                                                                      |                                                                                                                                |
| Zhu (2020)<br>n=6,994<br>China              | Chinese<br>Longitudinal<br>Healthy<br>Longevity<br>Survey<br>(CLHLS) (P) | Mean: 80 years<br>51% female<br>Race/ethnicity<br>not specified | Greenness (L): NDVI<br>(Longitudinal: no;<br>Location: residential;<br>Boundary: 500m buffer)<br>Time period: older<br>adulthood | Cognitive status (L):<br>Cognitive impairment<br>(source: Mini Mental<br>State Exam <24)<br>Time period: older<br>adulthood | Multivariable logistic<br>regression using<br>generalized<br>estimating equations<br>(age, gender, marital<br>status, urban/rural<br>residence, education,<br>occupation, financial<br>support, social and<br>leisure activity,<br>smoking status,<br>alcohol consumption,<br>and physical activity) | Positive: Individuals living in<br>highest quartile of<br>neighborhood greenness<br>had lower odds of cognitive<br>impairment. |
| Zijlema<br>(2017)                           | See Table 2                                                              |                                                                 |                                                                                                                                  |                                                                                                                             |                                                                                                                                                                                                                                                                                                      |                                                                                                                                |

---

Abbreviations: CS = cross-sectional; L = longitudinal; P = population-based/random sampling; UK = United Kingdom  
<sup>a</sup> Full list of papers found in Supplemental Text 1

Supplemental Table 4. Studies examining effect modification and mediation

| Citation <sup>a</sup> | Effect modifier examined                                                         | Effect modification findings                                                                                                                                                                                                                                                                                                                     | Mediator examined                                                     | Mediation findings                                                                                                                                                                                                           |
|-----------------------|----------------------------------------------------------------------------------|--------------------------------------------------------------------------------------------------------------------------------------------------------------------------------------------------------------------------------------------------------------------------------------------------------------------------------------------------|-----------------------------------------------------------------------|------------------------------------------------------------------------------------------------------------------------------------------------------------------------------------------------------------------------------|
| Brown (2018)          | Neighborhood income level                                                        | No effect modification                                                                                                                                                                                                                                                                                                                           | None                                                                  | N/A                                                                                                                                                                                                                          |
| Cherrie (2018)        | Sex<br>APOE ε4 allele<br>Adult occupational class<br>Adulthood park availability | Association between greater childhood park availability and slower cognitive decline from 70-76 years strongest in those with greater adulthood park availability, and these associations were stronger for women, APOE ε4 non-carriers, and individuals who had skilled/unskilled jobs (versus professional).                                   | None                                                                  | N/A                                                                                                                                                                                                                          |
| Cherrie (2019)        | Sex<br>Traffic Accident Density                                                  | No effect modification by sex. Association between childhood park activity space was not associated with cognitive aging differentially by traffic accident density; however, association between greater adolescent park activity space and better cognitive aging was restricted to those with lower traffic accident density (versus higher). | None                                                                  | N/A                                                                                                                                                                                                                          |
| Clarke (2012)         | None                                                                             | N/A                                                                                                                                                                                                                                                                                                                                              | Physical activity<br>Social interaction                               | No mediation                                                                                                                                                                                                                 |
| Dadvand (2015)        | Maternal education<br>Neighborhood SES                                           | Not effect modification                                                                                                                                                                                                                                                                                                                          | Traffic Related Air Pollution (elemental carbon, residential indoors) | Elemental carbon explained 20-65% of associations between school greenness and cognitive changes and resulted in changed (no longer significant) associations between school greenness and working memory and attentiveness. |
| Dadvand (2017)        | Cohort location (Sabadell versus Valencia)                                       | No effect modification                                                                                                                                                                                                                                                                                                                           | None                                                                  | N/A                                                                                                                                                                                                                          |

1  
2  
3  
4  
5  
6  
7  
8  
9  
10  
11  
12  
13  
14  
15  
16  
17  
18  
19  
20  
21  
22  
23  
24  
25  
26  
27  
28  
29  
30  
31  
32  
33  
34  
35  
36  
37  
38  
39  
40  
41  
42  
43  
44  
45  
46  
47

|                   |                                                                                                             |                                                                                                                                                                                                                                         |                                                                                                                    |                                                                                                                        |
|-------------------|-------------------------------------------------------------------------------------------------------------|-----------------------------------------------------------------------------------------------------------------------------------------------------------------------------------------------------------------------------------------|--------------------------------------------------------------------------------------------------------------------|------------------------------------------------------------------------------------------------------------------------|
| De Keijzer (2018) | Sex<br>Education<br>Area level deprivation                                                                  | Association between greater greenness and slower decline in global cognition found for women but not men, stronger in those with higher education (versus lower), and stronger among those with higher area deprivation (versus lower). | Physical activity<br>Air pollution<br>Social support                                                               | No mediation                                                                                                           |
| Dzhambov (2019)   | None                                                                                                        | N/A                                                                                                                                                                                                                                     | Waist circumference<br>Systolic blood pressure<br>Total cholesterol<br>Glucose<br>Air pollution (NO <sub>2</sub> ) | Lower waist circumference mediated association between greater greenness and higher CERAD-NB score (global cognition). |
| Flouri (2019)     | Neighborhood deprivation<br>Residential stability                                                           | No effect modification                                                                                                                                                                                                                  | None                                                                                                               | N/A                                                                                                                    |
| Hystad (2019)     | Education<br>Sex<br>Age<br>Household income<br>Race<br>Marital status<br>Years in current residence<br>City | Adjusted models were stratified but no statistical tests for differences between strata (i.e., no interaction terms used). Associations appeared to vary by sex, age, and education.                                                    | None                                                                                                               | N/A                                                                                                                    |
| Liao (2019)       | Household income<br>Pre-pregnancy body mass index<br>Infant sex                                             | Greater greenness associated with better cognition among children of mothers with pre-pregnancy BMI < 24 kg/m <sup>2</sup> .                                                                                                            | Traffic related air pollution (PM <sub>2.5</sub> )<br>Physical outdoor activities                                  | No mediation                                                                                                           |
| Wu (2017)         | Urbanicity                                                                                                  | Among those living conurbation areas with higher % green space, lower odds of cognitive impairment. Among those living in rural areas, those with higher % green space associated with greater odds of cognitive impairment.            | None                                                                                                               | N/A                                                                                                                    |
| Yu (2018)         | None                                                                                                        | N/A                                                                                                                                                                                                                                     | Physical activity<br>Depression                                                                                    | Physical activity mediated association between greater greenness and global cognition.                                 |

|    |         |                                                         |                                                         |                           |              |
|----|---------|---------------------------------------------------------|---------------------------------------------------------|---------------------------|--------------|
| 1  |         |                                                         |                                                         |                           |              |
| 2  |         |                                                         |                                                         |                           |              |
| 3  | Zhu     | Age (65-79 years; 80+ years)                            | Greater greenspace associated with lower odds           | None                      | N/A          |
| 4  | (2020)  | APOE genotype ( $\epsilon$ 4 carriers vs. non-carriers) | of cognitive impairment among 65-79 year olds           |                           |              |
| 5  |         |                                                         | but not 80+ year olds, and among APOE $\epsilon$ 4 non- |                           |              |
| 6  |         |                                                         | carriers but not $\epsilon$ 4 carriers.                 |                           |              |
| 7  |         |                                                         | These are stratified results, no interaction terms      |                           |              |
| 8  | Zijlema | None                                                    | had $p < 0.05$ .                                        | Physical activity         | No mediation |
| 9  | (2017)  |                                                         | N/A                                                     | Social interaction        |              |
| 10 |         |                                                         |                                                         | Loneliness                |              |
| 11 |         |                                                         |                                                         | Neighborhood social       |              |
| 12 |         |                                                         |                                                         | cohesion                  |              |
| 13 |         |                                                         |                                                         | Perceived mental health   |              |
| 14 |         |                                                         |                                                         | Traffic noise annoyance   |              |
| 15 |         |                                                         |                                                         | Worry about air pollution |              |

Abbreviations: APOE = apolipoprotein E; BMI = body mass index; PM = particulate matter

<sup>a</sup> Full list of papers found in Supplemental Text 1

## Preferred Reporting Items for Systematic reviews and Meta-Analyses extension for Scoping Reviews (PRISMA-ScR) Checklist

| SECTION                                               | ITEM | PRISMA-ScR CHECKLIST ITEM                                                                                                                                                                                                                                                                                  | REPORTED ON PAGE #      |
|-------------------------------------------------------|------|------------------------------------------------------------------------------------------------------------------------------------------------------------------------------------------------------------------------------------------------------------------------------------------------------------|-------------------------|
| <b>TITLE</b>                                          |      |                                                                                                                                                                                                                                                                                                            |                         |
| Title                                                 | 1    | Identify the report as a scoping review.                                                                                                                                                                                                                                                                   | 1                       |
| <b>ABSTRACT</b>                                       |      |                                                                                                                                                                                                                                                                                                            |                         |
| Structured summary                                    | 2    | Provide a structured summary that includes (as applicable): background, objectives, eligibility criteria, sources of evidence, charting methods, results, and conclusions that relate to the review questions and objectives.                                                                              | 2                       |
| <b>INTRODUCTION</b>                                   |      |                                                                                                                                                                                                                                                                                                            |                         |
| Rationale                                             | 3    | Describe the rationale for the review in the context of what is already known. Explain why the review questions/objectives lend themselves to a scoping review approach.                                                                                                                                   | 5-6                     |
| Objectives                                            | 4    | Provide an explicit statement of the questions and objectives being addressed with reference to their key elements (e.g., population or participants, concepts, and context) or other relevant key elements used to conceptualize the review questions and/or objectives.                                  | 6                       |
| <b>METHODS</b>                                        |      |                                                                                                                                                                                                                                                                                                            |                         |
| Protocol and registration                             | 5    | Indicate whether a review protocol exists; state if and where it can be accessed (e.g., a Web address); and if available, provide registration information, including the registration number.                                                                                                             | N/A                     |
| Eligibility criteria                                  | 6    | Specify characteristics of the sources of evidence used as eligibility criteria (e.g., years considered, language, and publication status), and provide a rationale.                                                                                                                                       | 7-8                     |
| Information sources*                                  | 7    | Describe all information sources in the search (e.g., databases with dates of coverage and contact with authors to identify additional sources), as well as the date the most recent search was executed.                                                                                                  | 7-8                     |
| Search                                                | 8    | Present the full electronic search strategy for at least 1 database, including any limits used, such that it could be repeated.                                                                                                                                                                            | 7-8, Suppl Fig 1, Fig 1 |
| Selection of sources of evidence†                     | 9    | State the process for selecting sources of evidence (i.e., screening and eligibility) included in the scoping review.                                                                                                                                                                                      | 7-8                     |
| Data charting process‡                                | 10   | Describe the methods of charting data from the included sources of evidence (e.g., calibrated forms or forms that have been tested by the team before their use, and whether data charting was done independently or in duplicate) and any processes for obtaining and confirming data from investigators. | 8                       |
| Data items                                            | 11   | List and define all variables for which data were sought and any assumptions and simplifications made.                                                                                                                                                                                                     | 8                       |
| Critical appraisal of individual sources of evidence§ | 12   | If done, provide a rationale for conducting a critical appraisal of included sources of evidence; describe the methods used and how this information was used in any data synthesis (if appropriate).                                                                                                      | n/a                     |



| SECTION                                       | ITEM | PRISMA-ScR CHECKLIST ITEM                                                                                                                                                                       | REPORTED ON PAGE #         |
|-----------------------------------------------|------|-------------------------------------------------------------------------------------------------------------------------------------------------------------------------------------------------|----------------------------|
| Synthesis of results                          | 13   | Describe the methods of handling and summarizing the data that were charted.                                                                                                                    | 8                          |
| <b>RESULTS</b>                                |      |                                                                                                                                                                                                 |                            |
| Selection of sources of evidence              | 14   | Give numbers of sources of evidence screened, assessed for eligibility, and included in the review, with reasons for exclusions at each stage, ideally using a flow diagram.                    | Fig 1                      |
| Characteristics of sources of evidence        | 15   | For each source of evidence, present characteristics for which data were charted and provide the citations.                                                                                     | 8-14                       |
| Critical appraisal within sources of evidence | 16   | If done, present data on critical appraisal of included sources of evidence (see item 12).                                                                                                      | n/a                        |
| Results of individual sources of evidence     | 17   | For each included source of evidence, present the relevant data that were charted that relate to the review questions and objectives.                                                           | Table 1-3, Suppl table 1-4 |
| Synthesis of results                          | 18   | Summarize and/or present the charting results as they relate to the review questions and objectives.                                                                                            | Table 1-3, Suppl table 1-4 |
| <b>DISCUSSION</b>                             |      |                                                                                                                                                                                                 |                            |
| Summary of evidence                           | 19   | Summarize the main results (including an overview of concepts, themes, and types of evidence available), link to the review questions and objectives, and consider the relevance to key groups. | 14-19                      |
| Limitations                                   | 20   | Discuss the limitations of the scoping review process.                                                                                                                                          | 20                         |
| Conclusions                                   | 21   | Provide a general interpretation of the results with respect to the review questions and objectives, as well as potential implications and/or next steps.                                       | 21                         |
| <b>FUNDING</b>                                |      |                                                                                                                                                                                                 |                            |
| Funding                                       | 22   | Describe sources of funding for the included sources of evidence, as well as sources of funding for the scoping review. Describe the role of the funders of the scoping review.                 | 4                          |

JBI = Joanna Briggs Institute; PRISMA-ScR = Preferred Reporting Items for Systematic reviews and Meta-Analyses extension for Scoping Reviews.

\* Where *sources of evidence* (see second footnote) are compiled from, such as bibliographic databases, social media platforms, and Web sites.

† A more inclusive/heterogeneous term used to account for the different types of evidence or data sources (e.g., quantitative and/or qualitative research, expert opinion, and policy documents) that may be eligible in a scoping review as opposed to only studies. This is not to be confused with *information sources* (see first footnote).

‡ The frameworks by Arksey and O'Malley (6) and Levac and colleagues (7) and the JBI guidance (4, 5) refer to the process of data extraction in a scoping review as data charting.

§ The process of systematically examining research evidence to assess its validity, results, and relevance before using it to inform a decision. This term is used for items 12 and 19 instead of "risk of bias" (which is more applicable to systematic reviews of interventions) to include and acknowledge the various sources of evidence that may be used in a scoping review (e.g., quantitative and/or qualitative research, expert opinion, and policy document).

From: Tricco AC, Lillie E, Zarin W, O'Brien KK, Colquhoun H, Levac D, et al. PRISMA Extension for Scoping Reviews (PRISMA-ScR): Checklist and Explanation. *Ann Intern Med.* 2018;169:467–473. doi: [10.7326/M18-0850](https://doi.org/10.7326/M18-0850).



St. Michael's

Inspired Care.  
Inspiring Science.

For peer review only - <http://bmjopen.bmj.com/site/about/guidelines.xhtml>
