# Supplementary material for: Outdoor green space exposure and brain health measures related to Alzheimer’s disease: a rapid review
Source: PubMed Central journal article supplement — BMJ Open. 2021 May 3;11(5):e043456. doi: 10.1136/bmjopen-2020-043456 (PMC8098949; doi:10.1136/bmjopen-2020-043456), 2021-05-03
Supplement: bmjopen-2020-043456supp001.pdf [file bmjopen-2020-043456supp001.pdf]

**Supplemental Figure 1.** Detailed diagram of literature search strategy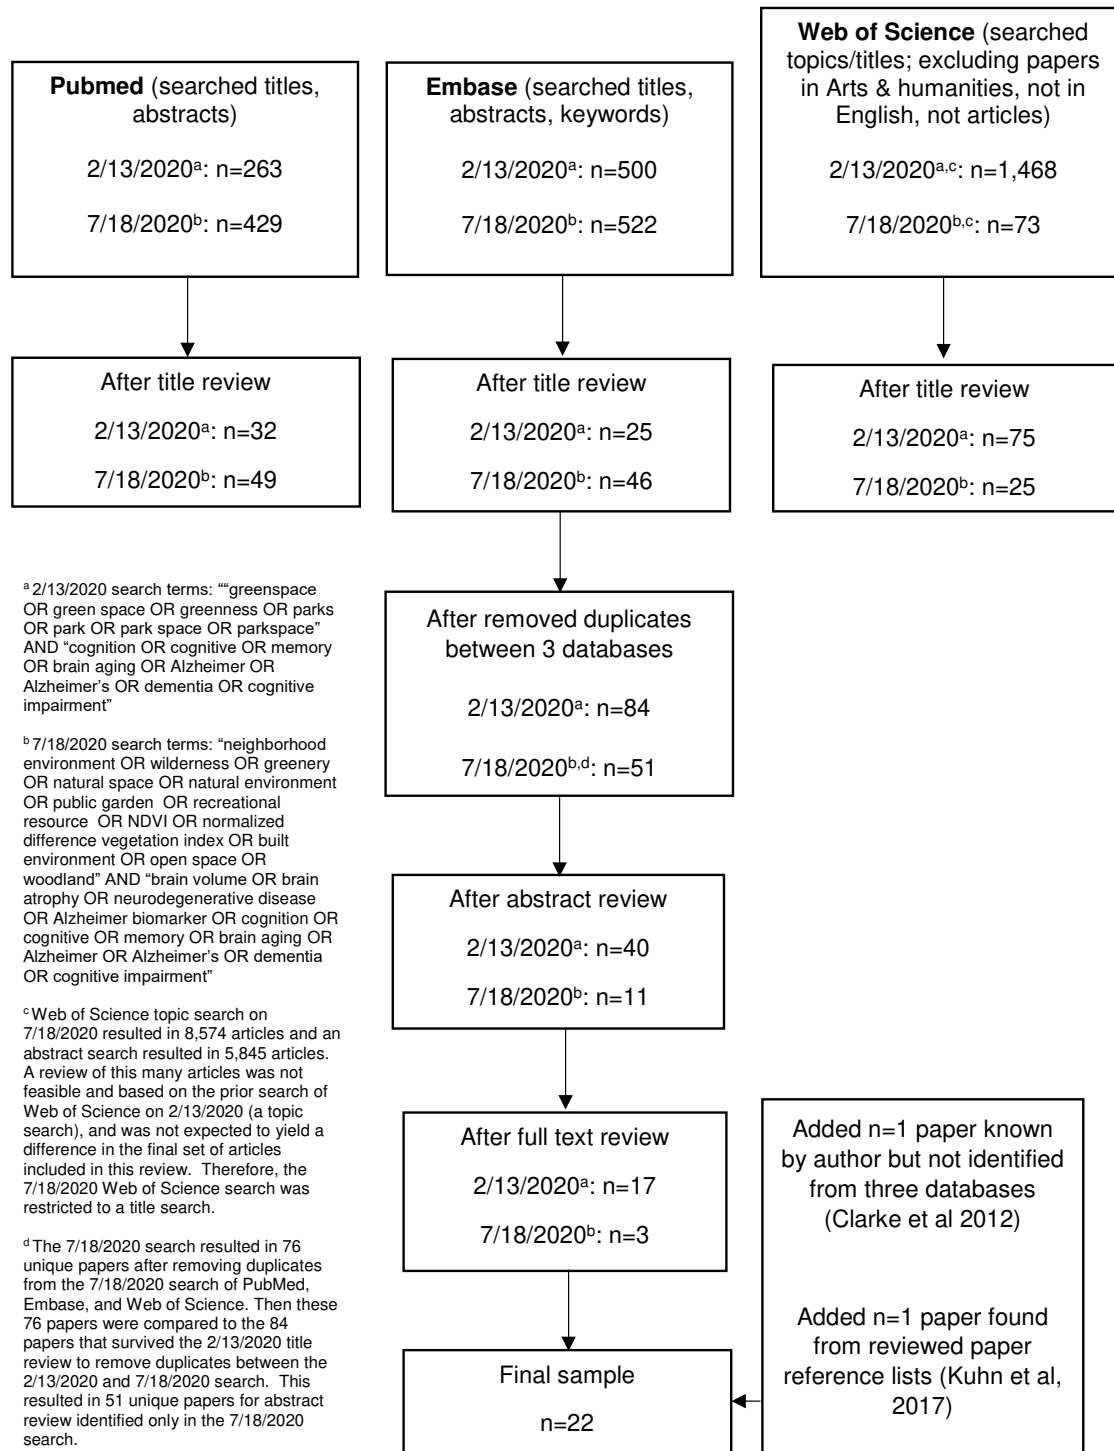

**Supplemental Text 1. List of 22 papers included in systematic review**

- Brown SC et al. (2018) Health Disparities in the Relationship of Neighborhood Greenness to Mental Health Outcomes in 249,405 U.S. Medicare Beneficiaries *Int J Environ Res Public Health* 15 doi:10.3390/ijerph15030430
- Cherrie MPC et al. (2018) Green space and cognitive ageing: A retrospective life course analysis in the Lothian Birth Cohort 1936 *Soc Sci Med* 196:56-65 doi:10.1016/j.socscimed.2017.10.038
- Cherrie MPC, Shortt NK, Ward Thompson C, Deary IJ, Pearce JR (2019) Association Between the Activity Space Exposure to Parks in Childhood and Adolescence and Cognitive Aging in Later Life *Int J Environ Res Public Health* 16 doi:10.3390/ijerph16040632
- Clarke PJ, Ailshire JA, House JS, Morenoff JD, King K, Melendez R, Langa KM (2012) Cognitive function in the community setting: the neighbourhood as a source of 'cognitive reserve'? *J Epidemiol Community Health* 66:730-736 doi:10.1136/jech.2010.128116
- Dadvand P et al. (2015) Green spaces and cognitive development in primary schoolchildren *Proc Natl Acad Sci U S A* 112:7937-7942 doi:10.1073/pnas.1503402112
- Dadvand P et al. (2018) The Association between Lifelong Greenspace Exposure and 3-Dimensional Brain Magnetic Resonance Imaging in Barcelona Schoolchildren *Environ Health Perspect* 126:027012 doi:10.1289/EHP1876
- Dadvand P et al. (2017) Lifelong Residential Exposure to Green Space and Attention: A Population-based Prospective Study *Environ Health Perspect* 125:097016 doi:10.1289/EHP694
- Dzhambov AM, Bahchevanov KM, Chompalov KA, Atanassova PA (2019) A feasibility study on the association between residential greenness and neurocognitive function in middle-aged Bulgarians *Arh Hig Rada Toksikol* 70:173-185 doi:10.2478/aiht-2019-70-3326
- de Keijzer C et al. (2018) Residential Surrounding Greenness and Cognitive Decline: A 10-Year Follow-up of the Whitehall II Cohort *Environ Health Perspect* 126:077003 doi:10.1289/EHP2875
- Flouri E, Papachristou E, Midouhas E (2019) The role of neighbourhood greenspace in children's spatial working memory *The British journal of educational psychology* 89:359-373 doi:10.1111/bjep.12243
- Hystad P PY, Noisel N, Boileau C (2019) Green space associations with mental health and cognitive function: Results from the Quebec CARTaGENE cohort *Environmental Epidemiology* 3:e040
- Kuhn S et al. (2017) In search of features that constitute an "enriched environment" in humans: Associations between geographical properties and brain structure *Scientific reports* 7 doi:ARTN 11920
- Liao J et al. (2019) Residential exposure to green space and early childhood neurodevelopment *Environment international* 128:70-76 doi:10.1016/j.envint.2019.03.070
- Reuben A et al. (2019) Residential neighborhood greenery and children's cognitive development *Social science & medicine* (1982) 230:271-279 doi:10.1016/j.socscimed.2019.04.029
- Wang D, Lau KK, Yu R, Wong SYS, Kwok TTY, Woo J (2017) Neighbouring green space and mortality in community-dwelling elderly Hong Kong Chinese: a cohort study *BMJ open* 7:e015794 doi:10.1136/bmjopen-2016-015794
- Ward JS, Duncan JS, Jarden A, Stewart T (2016) The impact of children's exposure to greenspace on physical activity, cognitive development, emotional wellbeing, and ability to appraise risk *Health Place* 40:44-50 doi:10.1016/j.healthplace.2016.04.015
- Wu YT, Prina AM, Jones A, Matthews FE, Brayne C, Collaboration MRCCF, Study A (2017) The Built Environment and Cognitive Disorders: Results From the Cognitive Function and Ageing Study II *Am J Prev Med* doi:10.1016/j.amepre.2016.11.020
- Wu YT et al. (2015) Community environment, cognitive impairment and dementia in later life: results from the Cognitive Function and Ageing Study *Age Ageing* 44:1005-1011 doi:10.1093/ageing/afv137
- Yu R, Wang D, Leung J, Lau K, Kwok T, Woo J (2018) Is Neighborhood Green Space Associated With Less Frailty? Evidence From the Mr. and Ms. Os (Hong Kong) Study *Journal of the American Medical Directors Association* 19:528-534 doi:10.1016/j.jamda.2017.12.015
- Yuchi W, Sbihi H, Davies H, Tamburic L, Brauer M (2020) Road proximity, air pollution, noise, green space and neurologic disease incidence: a population-based cohort study *Environmental health : a global access science source* 19:8 doi:10.1186/s12940-020-0565-4
- Zhu A, Yan L, Shu C, Zeng Y, Ji JS (2020) APOE epsilon4 Modifies Effect of Residential Greenness on Cognitive Function among Older Adults: A Longitudinal Analysis in China *Scientific reports* 10:82 doi:10.1038/s41598-019-57082-7
- Zijlema WL et al. (2017) The relationship between natural outdoor environments and cognitive functioning and its mediators *Environ Res* 155:268-275 doi:10.1016/j.envres.2017.02.017

Supplemental Table 1. Green space and brain health studies including children and adolescents (&lt;18 year olds)

| Citation <sup>a</sup> , sample size, location      | Sample source                   | Age, sex, race/ethnicity                                                    | Green space measure                                                                                                                                                 | Brain health measure                                                                                                                                                                          | Statistical Method (covariates)                                                                                                                                                                   | Associations (positive, inverse, null)                                                                                                                                                                                                                                                                                                                                                                                     |
|----------------------------------------------------|---------------------------------|-----------------------------------------------------------------------------|---------------------------------------------------------------------------------------------------------------------------------------------------------------------|-----------------------------------------------------------------------------------------------------------------------------------------------------------------------------------------------|---------------------------------------------------------------------------------------------------------------------------------------------------------------------------------------------------|----------------------------------------------------------------------------------------------------------------------------------------------------------------------------------------------------------------------------------------------------------------------------------------------------------------------------------------------------------------------------------------------------------------------------|
| Cherrie (2018)<br>n=281<br><br>Edinburgh, Scotland | Lothian Birth Cohort (P)        | 11-78 years<br><br>48% female<br><br>Race/ethnicity not specified           | Park space (L): % park space (Location: residential; Boundary: 500m, 1000m, 1500m buffer) Time period: childhood, adulthood, older adulthood                        | Cognition (L): Moray House Test No 12 (domain: intelligence) Time period: childhood, adulthood, older adulthood                                                                               | Multivariable linear regression (sex, father's occupation, number per room in childhood household, childhood smoking status, adulthood occupation, alcohol consumption, adulthood smoking status) | Positive: Greater neighborhood % park space in childhood and adulthood associated with less cognitive change from 70 to 76 years.<br>Null: Greater neighborhood % park space in childhood, adulthood, and older adulthood not associated with cognitive change from age 11 to 70. No association between % park space in late-life and cognitive change from 70 to 76 years.                                               |
| Dadvand (2015)<br>n=2,593<br><br>Barcelona, Spain  | 36 primary schools in Barcelona | 7-10 years (mean=8.5)<br><br>50% female<br><br>16% not Spanish, 84% Spanish | Greenness (CS): NDVI (Location: residential, school, school commute; Boundary: residential-250m buffer, school and commute route-50m buffer) Time period: childhood | Cognition (L): Computerized n-back test (domain: working memory); Computerized attentional network test (domain: attention, alerting, orienting, executive processing) Time period: childhood | Multivariable linear mixed effects regression (age, sex, maternal education, residential neighborhood SES)                                                                                        | Positive: Greater school greenness and total greenness (school, home, commute) associated with 12-month enhancement in working memory and attention. Greater commute route greenness associated with 12-month enhancement in working memory.<br>Null: No association between residential greenness and cognition, commute greenness and attention, or any greenness measure and alerting, orienting, executive processing. |

|                                                                          |                                                                                      |                                                               |                                                                                                                                                                             |                                                                                                                                                                                      |                                                                                                                                                                                                                           |                                                                                                                                                                                                                                                                             |
|--------------------------------------------------------------------------|--------------------------------------------------------------------------------------|---------------------------------------------------------------|-----------------------------------------------------------------------------------------------------------------------------------------------------------------------------|--------------------------------------------------------------------------------------------------------------------------------------------------------------------------------------|---------------------------------------------------------------------------------------------------------------------------------------------------------------------------------------------------------------------------|-----------------------------------------------------------------------------------------------------------------------------------------------------------------------------------------------------------------------------------------------------------------------------|
| Dadvand (2017)<br>n=888 at 4-5 year follow-up; n=987 at 7-year follow-up | Infancia y Medio Ambiente (INMA) cohort (P)                                          | 4-7 years<br>49% female<br>Race/ethnicity not specified       | Greenness (L): NDVI and Vegetation Continuous Fields (% woody vegetation >5 m high)<br>(Location: residential; Boundary: 100m, 300m, 500m buffer)<br>Time period: childhood | Cognition (L): Conners' Kiddie Continuous Performance Test (4-5 year olds) (domain: attention); Attentional Network Task (7 year olds) (domain: attention)<br>Time period: childhood | Multivariable linear mixed effects regression (age, sex, preterm birth, maternal cognitive performance, maternal smoking during pregnancy, exposure to environmental tobacco smoke, maternal education, neighborhood SES) | Positive: Greater neighborhood greenness (birth to 4-5 years old) associated with attention at 4-5 years and greater greenness (birth to 7 years old) associated with attention at 7 years old.<br>Null: % neighborhood woody vegetation >5m not associated with attention. |
| Dadvand (2018)<br>n=253                                                  | Brain Development and Air Pollution Ultrafine Particles in School Children (BREATHE) | Mean: 8.4 years<br>49% female<br>Race/ethnicity not specified | Greenness (L): NDVI<br>(Location: residential; Boundary: 100m, 500m buffer)<br>Time period: childhood                                                                       | Magnetic Resonance Imaging (CS) of gray and white matter in regional clusters<br>Time period: childhood                                                                              | Adjusted voxel-wise regression using statistical parametric maps (maternal education, neighborhood SES- included one or the other in the analysis)                                                                        | Positive: Greater neighborhood greenness exposure since birth associated with left and right prefrontal cortex, left premotor cortex, and white matter.<br>Null: No associations between greenness and other brain regions.                                                 |
| Flouri (2019)<br>n=4,758                                                 | UK Millenium Cohort Study (MCS) (P)                                                  | Mean: 10.6 years<br>49% female<br>74% white<br>26% non-white  | Green space (CS): % green space<br>(Location: residential; Boundary: ward)<br>Time period: childhood                                                                        | Cognition (CS): Cambridge Neuropsychological Test Automated Battery SWM Test (domain: spatial working memory)<br>Time period: childhood                                              | Multivariable, multilevel linear regression (age in months, gender, family socioeconomic status, ethnicity, sports participation, computer gaming, residential mobility since infancy, neighborhood deprivation)          | Positive: Greater % neighborhood green space associated with better spatial working memory.                                                                                                                                                                                 |

|                          |                                                                          |                                                                               |                                                                                                   |                                                                                                                                                                                                                                                                                                                                                                                       |                                                                                                                                                                                                                                                                                                                                           |                                                                                                                                                          |
|--------------------------|--------------------------------------------------------------------------|-------------------------------------------------------------------------------|---------------------------------------------------------------------------------------------------|---------------------------------------------------------------------------------------------------------------------------------------------------------------------------------------------------------------------------------------------------------------------------------------------------------------------------------------------------------------------------------------|-------------------------------------------------------------------------------------------------------------------------------------------------------------------------------------------------------------------------------------------------------------------------------------------------------------------------------------------|----------------------------------------------------------------------------------------------------------------------------------------------------------|
| Liao (2019)<br>n=1,312   | Women and Children<br>Medical and Healthcare Center of Wuhan             | Mean: 39 weeks<br><br>46% female<br><br>Race/ethnicity not specified          | Greenness (CS): NDVI<br>(Location: residential; Boundary: 300m buffer)<br>Time period: childhood  | Cognition (CS): Bayley Scales of Infant Development – Mental Development Index (Domain: perceptual acuities, memory, learning and problem solving, abstract thinking)<br>Time period: childhood                                                                                                                                                                                       | Multivariable, multiple linear regression (household income, maternal age, maternal education, maternal pre-pregnancy BMI, maternal passive smoking during pregnancy, gestational age, birth weight, residence areas)                                                                                                                     | Positive: Greater neighborhood greenness at birth associated with better Mental Development Index scores.                                                |
| Reuben (2019)<br>n=1,658 | Environmental Risk (E-Risk) Longitudinal Study (same sex twin study) (P) | Age 5, 12, and 18<br><br>52% female<br><br>Race/ethnicity not specified       | Greenness (L): NDVI<br>(Location: residential; Boundary: 1-mile buffer)<br>Time period: childhood | Cognition (L): Wechsler Preschool and Primary Scale of Intelligence-Revised, Wechsler Intelligence Scale for Children-IV, Wechsler Adult Intelligence Scale-IV (domain: crystallized and fluid cognitive ability); Spatial Span test (domain: executive function); Spatial Working Memory test (domain: working memory); Rapid Visual Information Processing test (domain: attention) | Multivariable analysis of covariance model for longitudinal model (sex, polygenic score for educational attainment, family socioeconomic status, neighborhood socioeconomic status)<br><br>Multivariable information maximum likelihood (FIML) estimated regression, accounting for missing data (same covariates as longitudinal models) | Null: Neighborhood greenness not associated with fluid ability, crystallized ability, executive function, attention, or working memory measured any age. |
| Ward (2016)<br>n=72      | Three intermediate schools                                               | 11-14 years (mean=12.7)<br><br>59% female<br><br>Race/ethnicity not specified | Time spent in green space from GPS (CS) Time period: childhood                                    | Cognition (CS): CNS Vital Signs (domain: visual memory, verbal memory, processing speed, psychomotor speed, reaction time, cognitive flexibility, executive function)<br>Time period: childhood                                                                                                                                                                                       | Multivariable generalized linear mixed regression (sex, age, school)                                                                                                                                                                                                                                                                      | Null: % time spent in greenspace not associated with any cognitive domain.                                                                               |

Abbreviations: CS = cross-sectional; L= longitudinal; UK = United Kingdom; P = population-based/random sampling

<sup>a</sup> Full list of papers found in Supplemental Text 1

Supplemental Table 2. Green space and brain health studies including adults aged 18-64 years

| Citation <sup>a</sup> , sample size, location | Sample source                            | Age, sex, race/ethnicity                                                               | Green space measure                                                                                                                                   | Brain health measure                                                                                                                                                                                                                                                               | Statistical Method (covariates)                                                                                                                                                                           | Associations (positive, inverse, null)                                                                                                                                                      |
|-----------------------------------------------|------------------------------------------|----------------------------------------------------------------------------------------|-------------------------------------------------------------------------------------------------------------------------------------------------------|------------------------------------------------------------------------------------------------------------------------------------------------------------------------------------------------------------------------------------------------------------------------------------|-----------------------------------------------------------------------------------------------------------------------------------------------------------------------------------------------------------|---------------------------------------------------------------------------------------------------------------------------------------------------------------------------------------------|
| Cherrie (2018)                                | See Table 1                              |                                                                                        |                                                                                                                                                       |                                                                                                                                                                                                                                                                                    |                                                                                                                                                                                                           |                                                                                                                                                                                             |
| Clarke (2012)<br>n = 949<br>Chicago, US       | Chicago Community Adult Health Study (P) | ≥50 years<br>56% female<br>37% black, 18% Hispanic, 43% white, 3% other race/ethnicity | Park space (CS): Park area in square miles (Location: residential; Boundary: US Census tract)<br>Time period: adulthood, older adulthood              | Cognition (CS): Modified Telephone Instrument for Cognitive Status (domain: global cognition)<br>Time period: adulthood, older adulthood                                                                                                                                           | Multivariable, multilevel linear regression (age, gender, marital status, race/ethnicity, employment status, socioeconomic position, index of comorbid conditions, physical activity, social interaction) | Null: neighborhood park area not associated with global cognition.                                                                                                                          |
| De Keijzer (2018)<br>n=6,506<br>UK            | The Whitehall II study (P)               | 45-68 years<br>29% female<br>91% white<br>9% non-white                                 | Greenness (L): NDVI and EVI (Location: residential; Boundary: 500m, 1000m buffer around postcode centroid)<br>Time period: adulthood, older adulthood | Cognition (L): Alice Heim 4 test of intelligence (domain: reasoning); S words, Animal names (domain: phonemic and semantic verbal fluency); Free recall test (domain: short-term memory); Global cognition z-score derived from 4 tests<br>Time period: adulthood, older adulthood | Multivariable linear mixed effects regression (gender, ethnicity, education, time varying: age, marital status, employment grade, neighborhood SES, diet, alcohol consumption, smoking status)            | Positive: Greater neighborhood greenness associated with slower decline in global cognition, reasoning, and fluency.<br>Null: Neighborhood greenness not associated with short-term memory. |

|                                               |                                  |                                                                      |                                                                                                                                            |                                                                                                                                                                                                                                                                                                                                                                                                                                                                                                         |                                                                                                                                                                                                                                              |                                                                                                                                                                                                                                                                                                                                                                                                                                                                                                                         |
|-----------------------------------------------|----------------------------------|----------------------------------------------------------------------|--------------------------------------------------------------------------------------------------------------------------------------------|---------------------------------------------------------------------------------------------------------------------------------------------------------------------------------------------------------------------------------------------------------------------------------------------------------------------------------------------------------------------------------------------------------------------------------------------------------------------------------------------------------|----------------------------------------------------------------------------------------------------------------------------------------------------------------------------------------------------------------------------------------------|-------------------------------------------------------------------------------------------------------------------------------------------------------------------------------------------------------------------------------------------------------------------------------------------------------------------------------------------------------------------------------------------------------------------------------------------------------------------------------------------------------------------------|
| Dzhambov (2019)<br>n=112<br>Plovdiv, Bulgaria | Convenience sample of volunteers | 45-55 years (mean: 50)<br>59% female<br>Race/ethnicity not specified | Greenness (CS):<br>NDVI<br>(Location: residential;<br>Boundary: 100m, 100m, 750m, 1000m buffer around residence)<br>Time period: adulthood | Cognition (CS):<br>Consortium to Establish a Registry for Alzheimer's Disease Neuropsychological Battery (CERAD-NB), including Verbal Fluency test (domain: fluency), modified Boston Naming Test (domain: naming), Word List Memory (domain: memory), Word List Recall (domain: memory), Word List Recognition; Montreal Cognitive Assessment (MoCA) (domain: global cognition); Magnetic Resonance Imaging (CS) of cortical thickness of multiple brain regions of interest<br>Time period: adulthood | Multivariable linear regression (age, sex, education, city, neighborhood population, smoking, alcohol consumption, waist circumference, blood pressure, cholesterol, blood glucose, nitrogen dioxide [NO <sub>2</sub> ], road traffic noise) | Positive: Greater greenness associated with better global cognition and verbal fluency. Greater greenness associated with greater cortical thickness in both hemispheres in the prefrontal cortex, bilateral fusiform gyrus, left precuneus and insula, and right cuneus.<br>Null: Greater greenness was not associated with scores on the subtests of the CERAD-NB except the Verbal Fluency Test. Greater greenness was not associated with cortical thickness in regions of the brain other than those listed above. |
| Hystad (2019)<br>n=6,658<br>Quebec, Canada    | CARTaGENE Cohort (P)             | 40-69 years (mean: 55)<br>55% female<br>81% white<br>19% non-white   | Greenness (L): NDVI<br>(Location: residential;<br>Boundary: 100m, 300m, 500m, 1000m buffer around postal codes)<br>Time period: adulthood  | Cognition (CS):<br>Reaction time test (domain: reaction time); Paired associates learning (domain: working memory); verbal and numeric reasoning (domain: executive function)<br>Time period: adulthood                                                                                                                                                                                                                                                                                                 | Multivariable linear regression (age, sex, household income, race, marital status, city, population density)                                                                                                                                 | Inverse: Five-year change in greenness associated with worse reasoning.<br>Null: Five-year average neighborhood greenness not associated with reaction time, reasoning, or working memory. Five-year change in greenness not associated with reaction time or working memory.                                                                                                                                                                                                                                           |

|                                                                                                |                                                                                                                                  |                                                                                   |                                                                                                                                                                                                                                                                                                                                                                                        |                                                                                                                                                                                                    |                                                                                                                                                                                                                                                                                                                                                                                  |                                                                                                                                                                                                                                                                                                                                               |
|------------------------------------------------------------------------------------------------|----------------------------------------------------------------------------------------------------------------------------------|-----------------------------------------------------------------------------------|----------------------------------------------------------------------------------------------------------------------------------------------------------------------------------------------------------------------------------------------------------------------------------------------------------------------------------------------------------------------------------------|----------------------------------------------------------------------------------------------------------------------------------------------------------------------------------------------------|----------------------------------------------------------------------------------------------------------------------------------------------------------------------------------------------------------------------------------------------------------------------------------------------------------------------------------------------------------------------------------|-----------------------------------------------------------------------------------------------------------------------------------------------------------------------------------------------------------------------------------------------------------------------------------------------------------------------------------------------|
| Yuchi (2020)<br>n=678,000<br>Vancouver, British Columbia, Canada                               | Medical Services Plan Physician Visit and Hospital Discharge data (P)                                                            | 45-84 years<br>Sex not provided for entire sample<br>Race/ethnicity not specified | Greenness (L): NDVI (Location: residential; Boundary: 100m buffer)<br>Time period: adulthood, older adulthood                                                                                                                                                                                                                                                                          | Diagnosis (L): Alzheimer's disease, non-Alzheimer's disease; and Parkinson's disease (source: hospital records, physician visits, prescription history)<br>Time period: adulthood, older adulthood | Multivariable Cox proportion hazards model for non-Alzheimer's disease and Parkinson's disease (age, sex, comorbidities, neighborhood household income, neighborhood education, neighborhood ethnicity);<br>Multivariable conditional logistic regression for Alzheimer's disease (comorbidities, neighborhood household income, neighborhood education, neighborhood ethnicity) | Positive: Greater neighborhood greenness associated with lower hazard ratio for non-Alzheimer's disease and Parkinson's disease.<br>Inverse: Greater neighborhood greenness associated with increased odds of Alzheimer's disease.                                                                                                            |
| Zijlema (2017)<br>n=1,628<br>Barcelona, Spain<br>Doetinchem, Netherlands<br>Stoke-on-Trent, UK | Positive Health Effects of the Natural Outdoor Environment in Typical Populations in Different Regions in Europe (PHENOTYPE) (P) | Mean: 48 years<br>54% female<br>Race/ethnicity not specified                      | Greenness (CS): NDVI (Location: residential; Boundary: 100m, 300m, 500m buffer);<br>Other green space measures (CS): Residential distance to natural outdoor environment, self-reported amount of natural outdoor environment; self-reported visits to natural outdoor environment; self-reported time visiting natural outdoor environment<br>Time period: adulthood, later-adulthood | Cognition (CS): Color Trails Test completion time and errors (domain: visual attention/effortful executive processing)<br>Time period: adulthood, older adulthood                                  | Multivariable, multilevel linear and logistic regression (age, sex, education, neighborhood socioeconomic status, time spent away from home, Color Trails Test quality)                                                                                                                                                                                                          | Positive: Greater residential distance to natural outdoor environments associated with greater cognitive test completion time.<br>Null: Residential greenness, percentage residential natural environment, self-reported natural environment visits, and self-reported time spent visiting natural environment not associated with cognition. |

Abbreviations: CS = cross-sectional; L = Longitudinal; P = population-based/random sampling; EVI = Enhanced Vegetation Index; UK = United Kingdom

<sup>a</sup> Full list of papers found in Supplemental Text 1



Supplemental Table 3. Green space and brain health studies including older adults aged ≥65 years

| Citation <sup>a</sup> , sample size, location | Sample source                                                 | Age, sex, race/ethnicity                                                 | Green space measure                                                                                                                                            | Brain health measure                                                                                                                                                                                                                                           | Statistical Method (covariates)                                                               | Associations (positive, inverse, null)                                                                                                                                                                                                           |
|-----------------------------------------------|---------------------------------------------------------------|--------------------------------------------------------------------------|----------------------------------------------------------------------------------------------------------------------------------------------------------------|----------------------------------------------------------------------------------------------------------------------------------------------------------------------------------------------------------------------------------------------------------------|-----------------------------------------------------------------------------------------------|--------------------------------------------------------------------------------------------------------------------------------------------------------------------------------------------------------------------------------------------------|
| Brown (2018)<br>n=249,405<br>Florida, US      | US Medicare Beneficiaries from Miami-Dade County, Florida (P) | Age: 65-111 years (mean: 76)<br>58% female<br>77% non-white<br>23% white | Greenness (CS): NDVI (Location: residential; Boundary: US Census block)<br>Time period: older adulthood                                                        | Diagnosis (CS): Alzheimer's disease (source: US Centers for Medicare and Medicaid Services)<br>Time period: older adulthood                                                                                                                                    | Multivariable, multilevel logistic regression (age, sex, race/ethnicity, neighborhood income) | Positive: Greater neighborhood greenness associated with lower odds of Alzheimer's disease.                                                                                                                                                      |
| Cherrie (2018)                                | See Table 1                                                   |                                                                          |                                                                                                                                                                |                                                                                                                                                                                                                                                                |                                                                                               |                                                                                                                                                                                                                                                  |
| Cherrie (2019)<br>n=281<br>Edinburgh, UK      | Lothian Birth Cohort (P)                                      | Age: 70-76 years<br>Female: 48%<br>Race/ethnicity not specified          | Park space (L): % park space (Location: residential, school, school route; Boundary: 1000m buffer around home, school, school route)<br>Time period: childhood | Cognition (L): Moray House Test No 12 (domain: intelligence)<br>Time period: older adulthood (sex, father's occupation, number per room in childhood household, childhood smoking status, adulthood occupation, alcohol consumption, adulthood smoking status) | Multivariable, multilevel linear regression                                                   | Positive: % park space at ages 11-18 near home, school, and school route associated with less cognitive change from 70 to 76 years.<br>Null: No association between % park space measures at ages 4-11 and cognitive change from 70 to 76 years. |
| Clarke (2012)                                 | See Table 2                                                   |                                                                          |                                                                                                                                                                |                                                                                                                                                                                                                                                                |                                                                                               |                                                                                                                                                                                                                                                  |
| De Keijzer (2018)                             | See Table 2                                                   |                                                                          |                                                                                                                                                                |                                                                                                                                                                                                                                                                |                                                                                               |                                                                                                                                                                                                                                                  |
| Kuhn (2017)<br>n=341<br>Berlin, Germany       | Berlin Aging Study II                                         | 61-82 years (mean: 70)<br>38% female<br>Race/ethnicity not specified     | Green space (CS): Amount of forest and urban green (Location: residential; Boundary: 1km surrounding residence)<br>Time period: older adulthood                | Magnetic Resonance Imaging (CS) of integrity of amygdala, pregenual anterior cingulate cortex (pACC), and dorsolateral prefrontal cortex (DLPFC) determined from                                                                                               | Structural Equation Modeling (SEM) (age, sex, years of education)                             | Positive: Greater amount of forest in neighborhood associated with greater amygdala integrity.<br>Null: No association between amount of forest and pACC or DLPFC integrity, or between amount                                                   |

|                                            |                                                                     |                                                                          |                                                                                                                                                                 | indicators of brain structural integrity (grey matter volume, magnetization transfer ratio, mean diffusivity)<br>Time period:<br>Older adulthood                                                                                                   |                                                                                                                                  | of urban green and any brain measure.                                                                                                                                                                                                     |
|--------------------------------------------|---------------------------------------------------------------------|--------------------------------------------------------------------------|-----------------------------------------------------------------------------------------------------------------------------------------------------------------|----------------------------------------------------------------------------------------------------------------------------------------------------------------------------------------------------------------------------------------------------|----------------------------------------------------------------------------------------------------------------------------------|-------------------------------------------------------------------------------------------------------------------------------------------------------------------------------------------------------------------------------------------|
| Wang (2017)<br>n=3,544<br>Hong Kong, China | Community based-cohort                                              | ≥65 years (median: 72)<br>50% female<br>Race/ethnicity not specified     | Greenness (CS): NDVI (Location: residential; boundary: 300m buffer)<br>Time period: older adulthood                                                             | Cognition (CS): Mini Mental State Exam (domain: global cognition)<br>Time period: older adulthood                                                                                                                                                  | Spearman's correlation coefficients (unadjusted analysis)                                                                        | Null: no correlation between neighborhood greenness and global cognition.                                                                                                                                                                 |
| Wu (2015)<br>n=2,424<br>UK                 | Medical Research Council Cognitive Function and Ageing Study (P)    | Age ≥74 years (Mean: 82)<br>60.7% female<br>Race/ethnicity not specified | Green space (CS): % green space/private gardens (Location: residential; Boundary: Lower – Layer Super Output Area for postcode)<br>Time period: older adulthood | Cognitive status (CS): Cognitive impairment (source: Mini Mental State Exam ≤25)<br>Diagnosis (CS): dementia (source: Geriatric Mental Status and Automatic Geriatric Examination for Computer Assisting Taxonomy)<br>Time period: older adulthood | Multivariable, multilevel logistic regression (age, gender, education, social class, number chronic illnesses, area deprivation) | Inverse: Individuals living with highest quartile of neighborhood green space (versus lowest) had increased odds of cognitive impairment and dementia.                                                                                    |
| Wu (2017)<br>n=7,505<br>UK                 | Medical Research Council Cognitive Function and Ageing Study II (P) | Median: 74 years<br>54% female<br>Race/ethnicity not specified           | Green space (CS): % green space/private gardens (Location: residential; Boundary: Lower – Layer Super Output Area for postcode)<br>Time period: older adulthood | Cognitive status (CS): Cognitive impairment (source: Mini Mental State Exam ≤25)<br>Diagnosis (CS): dementia (source: Geriatric Mental Status and Automatic Geriatric Examination for Computer Assisting Taxonomy)<br>Time period: older adulthood | Multivariable, multilevel logistic regression (age, gender, education, number chronic illnesses, area deprivation)               | Inverse: Individuals living with highest quintile of neighborhood green space/private gardens (versus lowest) had increased odds of cognitive impairment.<br>Null: No associations between neighborhood green space and odds of dementia. |

|                                             |                                                                          |                                                                 |                                                                                                                                  |                                                                                                                             |                                                                                                                                                                                                                                                                                                      |                                                                                                                                |
|---------------------------------------------|--------------------------------------------------------------------------|-----------------------------------------------------------------|----------------------------------------------------------------------------------------------------------------------------------|-----------------------------------------------------------------------------------------------------------------------------|------------------------------------------------------------------------------------------------------------------------------------------------------------------------------------------------------------------------------------------------------------------------------------------------------|--------------------------------------------------------------------------------------------------------------------------------|
| Yu (2018)<br>n=3,240<br>Hong Kong,<br>China | Mr. and Ms. Os<br>(Hong Kong)<br>study                                   | Mean: 72 years<br>49% female<br>Race/ethnicity<br>not specified | Greenness (CS): NDVI<br>(Location: residential;<br>Boundary: 300m buffer)<br>Time period: older<br>adulthood                     | Cognition (CS): Mini<br>Mental State Exam<br>(domain: global<br>cognition)<br>Time period: older<br>adulthood               | Multivariable<br>regression path<br>analysis (age, sex,<br>marital status,<br>socioeconomic<br>status, alcohol intake,<br>diet quality, baseline<br>frailty status)                                                                                                                                  | Null: Greater neighborhood<br>greenness not directly<br>associated with cognition.                                             |
| Yuchi (2020)                                | See Table 2                                                              |                                                                 |                                                                                                                                  |                                                                                                                             |                                                                                                                                                                                                                                                                                                      |                                                                                                                                |
| Zhu (2020)<br>n=6,994<br>China              | Chinese<br>Longitudinal<br>Healthy<br>Longevity<br>Survey<br>(CLHLS) (P) | Mean: 80 years<br>51% female<br>Race/ethnicity<br>not specified | Greenness (L): NDVI<br>(Longitudinal: no;<br>Location: residential;<br>Boundary: 500m buffer)<br>Time period: older<br>adulthood | Cognitive status (L):<br>Cognitive impairment<br>(source: Mini Mental<br>State Exam <24)<br>Time period: older<br>adulthood | Multivariable logistic<br>regression using<br>generalized<br>estimating equations<br>(age, gender, marital<br>status, urban/rural<br>residence, education,<br>occupation, financial<br>support, social and<br>leisure activity,<br>smoking status,<br>alcohol consumption,<br>and physical activity) | Positive: Individuals living in<br>highest quartile of<br>neighborhood greenness<br>had lower odds of cognitive<br>impairment. |
| Zijlema<br>(2017)                           | See Table 2                                                              |                                                                 |                                                                                                                                  |                                                                                                                             |                                                                                                                                                                                                                                                                                                      |                                                                                                                                |

Abbreviations: CS = cross-sectional; L = longitudinal; P = population-based/random sampling; UK = United Kingdom

<sup>a</sup> Full list of papers found in Supplemental Text 1

Supplemental Table 4. Studies examining effect modification and mediation

| Citation <sup>a</sup> | Effect modifier examined                                                         | Effect modification findings                                                                                                                                                                                                                                                                                                                     | Mediator examined                                                     | Mediation findings                                                                                                                                                                                                           |
|-----------------------|----------------------------------------------------------------------------------|--------------------------------------------------------------------------------------------------------------------------------------------------------------------------------------------------------------------------------------------------------------------------------------------------------------------------------------------------|-----------------------------------------------------------------------|------------------------------------------------------------------------------------------------------------------------------------------------------------------------------------------------------------------------------|
| Brown (2018)          | Neighborhood income level                                                        | No effect modification                                                                                                                                                                                                                                                                                                                           | None                                                                  | N/A                                                                                                                                                                                                                          |
| Cherrie (2018)        | Sex<br>APOE ε4 allele<br>Adult occupational class<br>Adulthood park availability | Association between greater childhood park availability and slower cognitive decline from 70-76 years strongest in those with greater adulthood park availability, and these associations were stronger for women, APOE ε4 non-carriers, and individuals who had skilled/unskilled jobs (versus professional).                                   | None                                                                  | N/A                                                                                                                                                                                                                          |
| Cherrie (2019)        | Sex<br>Traffic Accident Density                                                  | No effect modification by sex. Association between childhood park activity space was not associated with cognitive aging differentially by traffic accident density; however, association between greater adolescent park activity space and better cognitive aging was restricted to those with lower traffic accident density (versus higher). | None                                                                  | N/A                                                                                                                                                                                                                          |
| Clarke (2012)         | None                                                                             | N/A                                                                                                                                                                                                                                                                                                                                              | Physical activity<br>Social interaction                               | No mediation                                                                                                                                                                                                                 |
| Dadvand (2015)        | Maternal education<br>Neighborhood SES                                           | Not effect modification                                                                                                                                                                                                                                                                                                                          | Traffic Related Air Pollution (elemental carbon, residential indoors) | Elemental carbon explained 20-65% of associations between school greenness and cognitive changes and resulted in changed (no longer significant) associations between school greenness and working memory and attentiveness. |
| Dadvand (2017)        | Cohort location (Sabadell versus Valencia)                                       | No effect modification                                                                                                                                                                                                                                                                                                                           | None                                                                  | N/A                                                                                                                                                                                                                          |

|                   |                                                                                                             |                                                                                                                                                                                                                                         |                                                                                                                    |                                                                                                                        |
|-------------------|-------------------------------------------------------------------------------------------------------------|-----------------------------------------------------------------------------------------------------------------------------------------------------------------------------------------------------------------------------------------|--------------------------------------------------------------------------------------------------------------------|------------------------------------------------------------------------------------------------------------------------|
| De Keijzer (2018) | Sex<br>Education<br>Area level deprivation                                                                  | Association between greater greenness and slower decline in global cognition found for women but not men, stronger in those with higher education (versus lower), and stronger among those with higher area deprivation (versus lower). | Physical activity<br>Air pollution<br>Social support                                                               | No mediation                                                                                                           |
| Dzhambov (2019)   | None                                                                                                        | N/A                                                                                                                                                                                                                                     | Waist circumference<br>Systolic blood pressure<br>Total cholesterol<br>Glucose<br>Air pollution (NO <sub>2</sub> ) | Lower waist circumference mediated association between greater greenness and higher CERAD-NB score (global cognition). |
| Flouri (2019)     | Neighborhood deprivation<br>Residential stability                                                           | No effect modification                                                                                                                                                                                                                  | None                                                                                                               | N/A                                                                                                                    |
| Hystad (2019)     | Education<br>Sex<br>Age<br>Household income<br>Race<br>Marital status<br>Years in current residence<br>City | Adjusted models were stratified but no statistical tests for differences between strata (i.e., no interaction terms used). Associations appeared to vary by sex, age, and education.                                                    | None                                                                                                               | N/A                                                                                                                    |
| Liao (2019)       | Household income<br>Pre-pregnancy body mass index<br>Infant sex                                             | Greater greenness associated with better cognition among children of mothers with pre-pregnancy BMI < 24 kg/m <sup>2</sup> .                                                                                                            | Traffic related air pollution (PM <sub>2.5</sub> )<br>Physical outdoor activities                                  | No mediation                                                                                                           |
| Wu (2017)         | Urbanicity                                                                                                  | Among those living in conurbation areas with higher % green space, lower odds of cognitive impairment. Among those living in rural areas, those with higher % green space associated with greater odds of cognitive impairment.         | None                                                                                                               | N/A                                                                                                                    |
| Yu (2018)         | None                                                                                                        | N/A                                                                                                                                                                                                                                     | Physical activity<br>Depression                                                                                    | Physical activity mediated association between greater greenness and global cognition.                                 |

|                |                                                                                         |                                                                                                                                                                                                                                                                   |                                                                                                                                                                          |              |
|----------------|-----------------------------------------------------------------------------------------|-------------------------------------------------------------------------------------------------------------------------------------------------------------------------------------------------------------------------------------------------------------------|--------------------------------------------------------------------------------------------------------------------------------------------------------------------------|--------------|
| Zhu (2020)     | Age (65-79 years; 80+ years)<br>APOE genotype ( $\epsilon$ 4 carriers vs. non-carriers) | Greater greenspace associated with lower odds of cognitive impairment among 65-79 year olds but not 80+ year olds, and among APOE $\epsilon$ 4 non-carriers but not $\epsilon$ 4 carriers.<br>These are stratified results, no interaction terms had $p < 0.05$ . | None                                                                                                                                                                     | N/A          |
| Zijlema (2017) | None                                                                                    | N/A                                                                                                                                                                                                                                                               | Physical activity<br>Social interaction<br>Loneliness<br>Neighborhood social cohesion<br>Perceived mental health<br>Traffic noise annoyance<br>Worry about air pollution | No mediation |

Abbreviations: APOE = apolipoprotein E; BMI = body mass index; PM = particulate matter

<sup>a</sup> Full list of papers found in Supplemental Text 1
